# Supplementary material for: Copper-catalysed cross-couplings of arylboronate esters with aryl and heteroaryl iodides and bromides
Source: Royal Society of Chemistry journal article supplement (doi:10.1039/c4qo00331d), 2015-01-01

## **Copper-Catalyzed Cross-Coupling of Arylboronate Esters with Aryl and Heteroaryl Iodides and Bromides**

Santosh K. Gurung, Surendra Thapa, Bijay Shrestha, Ramesh Giri\*

*Department of Chemistry & Chemical Biology, The University of New Mexico, Albuquerque, NM 87131*

### **Contents**

|                                                                                                   |    |
|---------------------------------------------------------------------------------------------------|----|
| 1. General Information .....                                                                      | 2  |
| 2. Experimental Section.....                                                                      | 3  |
| 2.1. Screening of Various Organoboron Reagents with Aryl Bromides and Reaction Optimization ..... | 3  |
| 2.2. General Procedure A (in the Presence of Ligand PN) .....                                     | 4  |
| 2.3. General Procedure B (in the Absence of Ligand) .....                                         | 4  |
| 2.4. Characterization Data for New Compounds .....                                                | 4  |
| 3. Reference .....                                                                                | 13 |
| 4. NMR Spectra .....                                                                              | 14 |

## 1. General Information

All the reactions and handling of chemicals were done inside a nitrogen-filled glovebox unless stated otherwise. All the glassware including 1-dram borosilicate (Kimble-Chase) vials for screening reactions and pressure vessels for large scale reactions for isolation were properly dried in an oven before use. Bulk solvents were obtained from EMD and anhydrous solvents (DMF, dioxane) were obtained from Sigma-Aldrich (Sure/Seal<sup>TM</sup>) and were used directly without further purification. Deuterated solvents were purchased from the Cambridge Isotope. Aryl halides were purchased from Acros, Sigma-Aldrich, Oakwood, TCI-America, Matrix and Alfa-Aesar. CuI (99.999%) and CsF (99.9%) were procured from Sigma-Aldrich and Alfa-Aesar, respectively. Arylboronate esters were prepared by following the literature procedure from arylboronic acids.<sup>1</sup> P,N ligand (**PN**) was purchased from Sigma-Aldrich and was purified by three successive runs through silica gel columns using first 3% diethyl ether in hexanes, and then the second and third times 6% triethylamine in hexanes. 2-(Phenyl)pyridine (**16**) (Table 2, entry 8) arising from the cross-coupling of phenylboronic acid neopentylglycol ester with 2-Bromopyridine was identified by comparing <sup>1</sup>H and <sup>13</sup>C NMR spectra of the isolated compounds with the commercially available standard sample. <sup>1</sup>H, <sup>13</sup>C <sup>19</sup>F and <sup>11</sup>B NMR spectra were recorded on a Bruker instrument (300, 75, 282 and 96 MHz, respectively) and internally referenced to the residual solvent signals of CDCl<sub>3</sub> at 7.26 ppm for <sup>1</sup>H NMR, CDCl<sub>3</sub> at 77.16 ppm for <sup>13</sup>C, C<sub>6</sub>D<sub>6</sub> at 7.15 ppm for <sup>1</sup>H NMR, C<sub>6</sub>F<sub>6</sub> at -164.9 ppm for <sup>19</sup>F NMR, and boric acid at 36.0 ppm for <sup>11</sup>B NMR. NMR chemical shifts and the coupling constants (*J*) for <sup>1</sup>H, <sup>13</sup>C and <sup>19</sup>F NMR are reported in δ parts per millions (ppm) and in Hertz respectively. The following conventions are used for multiplicities: s, singlet; d, doublet; t, triplet; m, multiplet; dd, doublet of doublet; dt, doublet of triplet; ddd, doublet of double doublet. High resolution mass and NMR spectra for new compounds were recorded at the Mass Spectrometry and NMR Facilities, Department of Chemistry and Chemical Biology, University of New Mexico.

## 2. Experimental Section

### 2.1. Screening of Various Organoboron Reagents with Aryl Bromides and Reaction Optimization

In a glovebox, arylboron reagents (0.10 mmol), aryl halide (0.10 mmol), CsF (22.8 mg, 0.15 mmol), CuI (0.9 mg, 0.0050 mmol, or 1.90 mg, 0.010 mmol) and PN ligand (1.4 mg, 0.0050 mmol, or 2.7 mg, 0.010 mmol) were weighed in a 1 dram vial and dissolved in DMF/dioxane (0.5 mL, 1:1). For reactions with 2-bromopyridine, PN ligand was not used. The vial was then tightly capped, taken out of the glovebox and placed in an oil bath pre-heated to 120 °C with vigorous stirring. After 36-48 h, the reaction mixture was cooled down to room temperature, diluted with ethyl acetate (2 mL), filtered through a pad of Silica gel in a pipette and analyzed by GC using 2-nitrobiphenyl as a standard. The percentage yields of the products are tabulated below:

|                                                                                     | Ph-B(OH) <sub>2</sub> | Ph-BF <sub>3</sub> K | 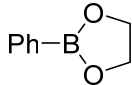 |  |  |
|-------------------------------------------------------------------------------------|-----------------------|----------------------|-----------------------------------------------------------------------------------|------------------------------------------------------------------------------------|-------------------------------------------------------------------------------------|
|  | 11%                   | 0%                   | 26%                                                                               | 10%                                                                                | 74%                                                                                 |
|  | trace                 | 0%                   | 65%                                                                               | 0%                                                                                 | 47%                                                                                 |

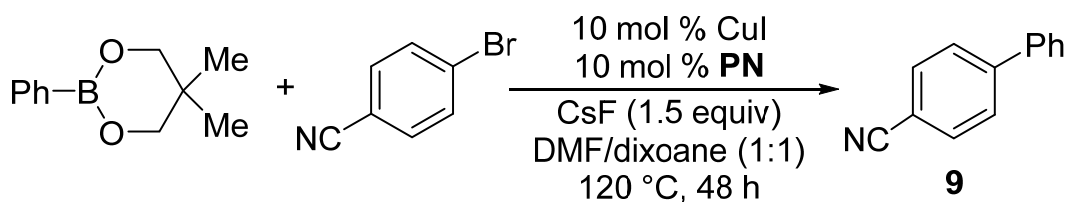

| entry | modified conditions                                                     | yield (%) <sup>b</sup> |
|-------|-------------------------------------------------------------------------|------------------------|
| 1     | none                                                                    | 74 (69)                |
| 2     | 2-(diphenylphosphino)- <i>N,N</i> -dimethylaniline instead of <b>PN</b> | 43                     |
| 3     | 1,10-phenanthroline instead of <b>PN</b>                                | 52                     |
| 4     | without <b>PN</b>                                                       | 36                     |
| 5     | without CsF                                                             | 0                      |
| 6     | without CuI                                                             | 0                      |
| 7     | NaOMe, KF or K <sub>2</sub> CO <sub>3</sub> instead of CsF              | 0                      |

## 2.2. General Procedure A (in the Presence of Ligand PN)

In a glovebox, arylboronate ester (1.0 mmol), aryl halide (1.0 mmol), CsF (228 mg, 1.5 mmol), CuI (9.5 mg, 0.050 mmol, or 19.0 mg, 0.10 mmol) and **PN** ligand (13.5 mg, 0.050 mmol, or 27 mg, 0.10 mmol) were weighed in a 15-mL pressure vessel and dissolved in DMF/dioxane (5 mL, 1:1). The pressure vessel was then tightly capped, taken out of the glovebox and placed in an oil bath pre-heated to 120 °C with vigorous stirring. After 48 h, the reaction mixture was cooled down to room temperature, diluted with H<sub>2</sub>O (10 mL) and extracted with ethyl acetate (5 mL × 3). The combined organic fraction was dried over Na<sub>2</sub>SO<sub>4</sub>, cotton-filtered and the solvent was removed in a rotary evaporator. The product was purified by silica gel column chromatography using hexanes and a combination of hexanes with diethyl ether or ethyl acetate as an eluting solvent.

## 2.3. General Procedure B (in the Absence of Ligand)

In a glovebox, arylboronate ester (1.0 mmol), aryl halide (1.0 mmol), CsF (228 mg, 1.5 mmol) and CuI (9.5 mg, 0.050 mmol, or 19.0 mg, 0.1 mmol) were weighed were weighed in a 15-mL pressure vessel and dissolved in DMF (5 mL). The pressure vessel was then tightly capped, taken out of the glovebox and placed in an oil bath pre-heated to 120 °C with vigorous stirring. After 24 h, the reaction mixture was cooled down to room temperature, diluted with H<sub>2</sub>O (10 mL) and extracted with ethyl acetate (5 mL × 3). The combined organic fraction was dried over Na<sub>2</sub>SO<sub>4</sub>, cotton-filtered and the solvent was removed in a rotary evaporator. The product was purified by silica gel column chromatography using hexanes and a combination of hexanes and ethyl acetate as an eluting solvent.

## 2.4. Characterization Data for New Compounds

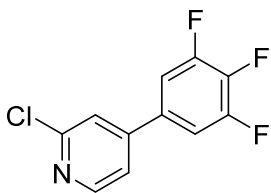

*2-Chloro-4-(3,4,5-trifluorophenyl)pyridine (1)*: The title compound **1** was obtained as a white solid (171 mg, 70% yield) after purification by silica gel column chromatography.

<sup>1</sup>H NMR (300 MHz, CDCl<sub>3</sub>) δ 7.15-7.20 (m, 2H), 7.26 (dd, *J* = 5.1, 1.5 Hz, 1H), 7.38 (d,

$J = 1.5$  Hz, 1H), 8.39 (d,  $J = 5.4$  Hz, 1H);  $^{13}\text{C}$  NMR (75 MHz,  $\text{CDCl}_3$ )  $\delta$  111.6 (dd,  $J_{\text{CF}} = 7.7$  Hz), 120.2, 121.9, 133.1 (q,  $J_{\text{CF}} = 8.4$  Hz), 140.8 (dt,  $J_{\text{CF}} = 254.5, 14.9$  Hz), 148.5, 150.5, 151.8 (ddd,  $J_{\text{CF}} = 250.7, 10.4, 4.2$  Hz), 152.7;  $^{19}\text{F}$  NMR (282 Hz,  $\text{CDCl}_3$ )  $\delta$  -158.0 (t,  $J_{\text{FF}} = 22.6$  Hz), -132.2 (d,  $J_{\text{FF}} = 0.8$  Hz); HRMS (ESI) Calcd for  $\text{C}_{11}\text{H}_6\text{ClF}_3\text{N}$  ( $\text{MH}^+$ ) 244.0141, found 244.0135.

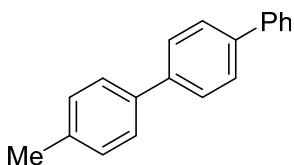

*4-(4-Methylphenyl)-biphenyl (2)*: The title compound **2** was obtained as a white solid (172 mg, 64% yield) after purification by silica gel column chromatography.  $^1\text{H}$  NMR (300 MHz,  $\text{CDCl}_3$ )  $\delta$  2.44 (s, 3H), 7.30(d,  $J = 8.1$ Hz, 2H), 7.38(t,  $J = 7.5$  Hz, 1H), 7.48 (t,  $J = 7.8$  Hz, 2H), 7.57 (d,  $J = 8.1$  Hz, 2H), 7.67 (d,  $J = 7.2$  Hz, 2H), 7.69 (s, 4H);  $^{13}\text{C}$  NMR (75 MHz,  $\text{CDCl}_3$ )  $\delta$  21.3, 127.0, 127.2, 127.4, 127.6, 128.9, 129.7, 137.3, 137.9, 140.0, 140.2, 140.9; HRMS (APPI) Calcd for  $\text{C}_{19}\text{H}_{16}$  ( $\text{M}^+$ ) 244.1252, found 244.1259.

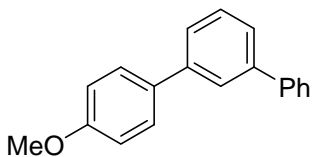

*3-(4-Methoxyphenyl)-biphenyl (3)*: The title compound **3** was obtained as a white solid (172 mg, 66% yield) after purification by silica gel column chromatography.  $^1\text{H}$  NMR (300 MHz,  $\text{CDCl}_3$ )  $\delta$  3.87 (s, 3H), 7.01(d,  $J = 8.7$ Hz, 2H), 7.35-7.67 (m, 10H), 7.77 (s, 1H);  $^{13}\text{C}$  NMR (75 MHz,  $\text{CDCl}_3$ )  $\delta$  55.4, 114.3, 125.6, 125.8, 127.3, 127.4, 128.3, 128.9, 129.2, 133.8, 141.4, 141.4, 141.8, 159.3; HRMS (APPI) Calcd for  $\text{C}_{19}\text{H}_{16}\text{O}$  ( $\text{M}^+$ ) 260.1201, found 260.1202.

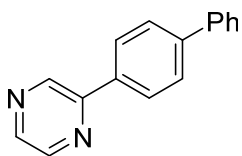

*2-(4-Biphenyl)-pyrazine (4)*: The title compound **4** was obtained as a white solid (160 mg, 69% yield) after purification by silica gel column chromatography.  $^1\text{H}$  NMR (300 MHz,  $\text{CDCl}_3$ )  $\delta$  7.36-7.42 (m, 1H), 7.46-7.51 (m, 2H), 7.66-7.68 (m, 2H), 7.74-7.77 (m, 2H), 8.10-8.13 (m, 2H), 8.52 (d,  $J = 2.4\text{Hz}$ , 1H), 8.65 (dd,  $J = 2.1, 1.5\text{ Hz}$ , 1H), 9.09 (d,  $J = 1.5\text{ Hz}$ , 1H);  $^{13}\text{C}$  NMR (75 MHz,  $\text{CDCl}_3$ )  $\delta$  127.2, 127.5, 127.8, 127.9, 129.0, 135.3, 140.3, 142.3, 142.8, 143.0, 144.3, 152.6; HRMS (ESI) Calcd for  $\text{C}_{16}\text{H}_{13}\text{N}_2$  ( $\text{MH}$ ) $^+$  233.1079, found 233.1082.

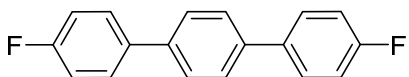

*4,4''-Difluoro-p-terphenyl (5)*: The title compound **5** was obtained as a white solid (184 mg, 69% yield) after purification by silica gel column chromatography.  $^1\text{H}$  NMR (300 MHz,  $\text{CDCl}_3$ )  $\delta$  7.11-7.19 (m, 4H), 7.56-7.62 (m, 8H);  $^{19}\text{F}$  NMR (282 Hz,  $\text{CDCl}_3$ )  $\delta$  -113.9; HRMS (APPI) Calcd for  $\text{C}_{18}\text{H}_{12}\text{F}_2$  ( $\text{M}$ ) $^+$  266.0907, found 266.090.

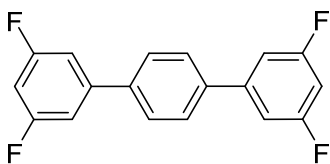

*3,3'',5,5''-Tetrafluoro-p-terphenyl (6)*: The title compound **6** was obtained as a white solid (215 mg, 71% yield) after purification by silica gel column chromatography.  $^1\text{H}$

NMR (300 MHz, CDCl<sub>3</sub>)  $\delta$  6.82 (t,  $J = 8.7$  Hz, 2H), 7.15 (d,  $J = 6.9$  Hz, 4H), 7.64 (s, 4H); <sup>13</sup>C NMR (75 MHz, CDCl<sub>3</sub>)  $\delta$  103.0 (t,  $J_{CF} = 25.2$  Hz), 110.0 (q,  $J_{CF} = 8.1$  Hz), 127.7, 139.1, 143.7 (t,  $J_{CF} = 9.4$  Hz), 163.6 (dd,  $J_{CF} = 246.8, 13.0$  Hz); <sup>19</sup>F NMR (282 Hz, CDCl<sub>3</sub>)  $\delta$  -107.8; HRMS (APPI) Calcd for C<sub>18</sub>H<sub>10</sub>F<sub>4</sub> (M)<sup>+</sup> 302.0719, found 302.0718.

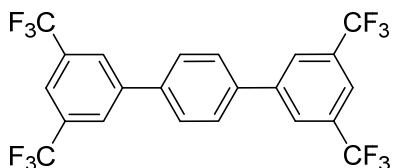

*3,3',5,5'-Tetrakis(trifluoromethyl)-p-terphenyl (7)*: The title compound **7** was obtained as a white solid (236 mg, 47% yield) after purification by silica gel column chromatography. <sup>1</sup>H NMR (300 MHz, CDCl<sub>3</sub>)  $\delta$  7.76 (s, 4H), 7.91 (s, 2H), 8.06 (s, 4H); <sup>13</sup>C NMR (75 MHz, CDCl<sub>3</sub>)  $\delta$  121.6 (t,  $J_{CF} = 4.4$  Hz), 125.3, 127.3, 128.3, 132.6 (q,  $J_{CF} = 33.1$  Hz), 138.9, 142.4; <sup>19</sup>F NMR (282 Hz, CDCl<sub>3</sub>)  $\delta$  -62.8; HRMS (APPI) Calcd for C<sub>22</sub>H<sub>10</sub>F<sub>12</sub> (M)<sup>+</sup> 502.0591, found 502.0589.

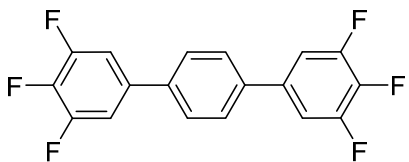

*3,4,5,3',4',5'-Hexafluoro-p-terphenyl (8)*: The title compound **8** was obtained as a white solid (247 mg, 73% yield) after purification by silica gel column chromatography. <sup>1</sup>H NMR (300 MHz, C<sub>6</sub>D<sub>6</sub>)  $\delta$  6.70-6.76 (m, 4H), 6.98 (s, 4H); <sup>19</sup>F NMR (282 Hz, C<sub>6</sub>D<sub>6</sub>)  $\delta$  -160.3 (t,  $J_{FF} = 17.5$  Hz), -132.1 (d,  $J_{FF} = 18.1$  Hz); HRMS (APPI) Calcd for C<sub>18</sub>H<sub>8</sub>F<sub>6</sub> (M)<sup>+</sup> 338.053, found 338.0526.

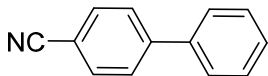

*4-phenylbenzonitrile (9)*: The title compound **9** was obtained as a white solid (124 mg, 69% yield) after purification by silica gel column chromatography.  $^1\text{H}$  NMR (300 MHz,  $\text{CDCl}_3$ )  $\delta$  7.40-7.52 (m, 3H), 7.58-7.61 (m, 2H), 7.67-7.74 (m, 4H);  $^{13}\text{C}$  NMR (75 MHz,  $\text{CDCl}_3$ )  $\delta$  111.0, 119.0, 127.3, 127.8, 128.8, 129.2, 132.7, 139.3, 145.8; HRMS (APPI) Calcd for  $\text{C}_{13}\text{H}_9\text{N}$  (M) $^+$  179.0735, found 179.0742.

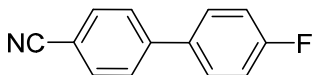

*4-(4-Fluorophenyl)benzonitrile (10)*: The title compound **10** was obtained as a white solid (97 mg, 49% yield) after purification by silica gel column chromatography.  $^1\text{H}$  NMR (300 MHz,  $\text{CDCl}_3$ )  $\delta$  7.18 (t,  $J = 8.7$  Hz, 2H), 7.56 (dd,  $J = 8.7, 5.4$  Hz, 2H), 7.64 (d,  $J = 8.4$  Hz, 2H), 7.73 (d,  $J = 8.4$  Hz, 2H);  $^{13}\text{C}$  NMR (75 MHz,  $\text{CDCl}_3$ )  $\delta$  111.1, 1116.3 (d,  $J_{\text{CF}} = 21.5$  Hz), 119.0, 127.7, 129.1 (d,  $J_{\text{CF}} = 8.2$  Hz), 132.8, 135.4, 144.8, 163.3 (d,  $J_{\text{CF}} = 247.0$  Hz);  $^{19}\text{F}$  NMR (282 Hz,  $\text{CDCl}_3$ )  $\delta$  -111.6; GCMS (M) 197.

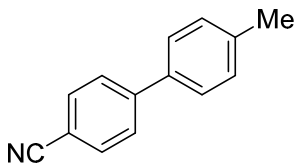

*4-(4-Tolyl)benzonitrile (11)*: The title compound **11** was obtained as a white solid (87 mg, 45% yield) after purification by silica gel column chromatography.  $^1\text{H}$  NMR (300 MHz,  $\text{CDCl}_3$ )  $\delta$  2.42 (s, 3H), 7.29 (d,  $J = 8.7$  Hz, 2H), 7.29 (d,  $J = 8.4$  Hz, 2H), 7.65-7.72 (m, 4H);  $^{13}\text{C}$  NMR (75 MHz,  $\text{CDCl}_3$ )  $\delta$  21.3, 110.7, 119.1, 127.1, 127.5, 129.9, 132.7, 136.4, 138.9, 145.7; HRMS (APPI) Calcd for  $\text{C}_{14}\text{H}_{11}\text{N}$  (M) $^+$  193.0891 found 193.0896.

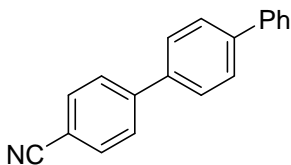

*4-Cyano-p-terphenyl (12)*: The title compound **12** was obtained as a white solid (123 mg, 48% yield) after purification by silica gel column chromatography.  $^1\text{H}$  NMR (300 MHz,



CDCl<sub>3</sub>)  $\delta$  7.37-7.42 (m, 1H), 7.46-7.51 (m, 2H), 7.63-7.73 (m, 6H), 7.74 (s, 4H); <sup>13</sup>C NMR (75 MHz, CDCl<sub>3</sub>)  $\delta$  111.1, 119.1, 127.2, 127.7, 127.8, 127.9, 128.0, 129.1, 132.8, 138.1, 140.3, 141.7, 145.3; HRMS (APPI) Calcd for C<sub>19</sub>H<sub>13</sub>N (M)<sup>+</sup> 255.1048, found 255.1050.

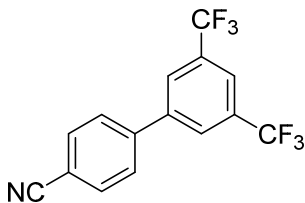

*4-(3,5-Bis(trifluoromethyl)phenyl)benzonitrile (13)*: The title compound **13** was obtained as a white solid (107 mg, 34% yield) after purification by silica gel column chromatography. <sup>1</sup>H NMR (300 MHz, CDCl<sub>3</sub>)  $\delta$  7.73 (d, *J* = 8.7 Hz, 2H), 7.82 (d, *J* = 8.4 Hz, 2H), 7.94 (s, 1H), 8.02 (s, 2H); <sup>13</sup>C NMR (75 MHz, CDCl<sub>3</sub>)  $\delta$  113.0, 118.4, 121.5, 122.4 (t, *J*<sub>CF</sub> = 3.4 Hz), 123.3 (d, *J*<sub>CF</sub> = 271.3 Hz), 127.5, 128.2, 132.8 (t, *J*<sub>CF</sub> = 28.7 Hz), 133.2, 141.5, 142.6; <sup>19</sup>F NMR (282 Hz, CDCl<sub>3</sub>)  $\delta$  -63.0; GCMS (M/z) 315.

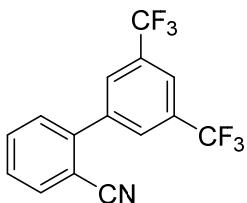

*2-(3,5-Bis(trifluoromethyl)phenyl)benzonitrile (14)*: The title compound **14** was obtained as a white solid (167 mg, 53% yield) after purification by silica gel column chromatography. <sup>1</sup>H NMR (300 MHz, CDCl<sub>3</sub>)  $\delta$  7.55-7.61 (m, 2H), 7.75 (td, *J* = 7.8, 1.2 Hz, 1H), 7.84 (d, *J* = 7.8 Hz, 1H), 7.98-8.02 (m, 3H); <sup>13</sup>C NMR (75 MHz, CDCl<sub>3</sub>)  $\delta$  111.7, 117.8, 122.7 (t, *J*<sub>CF</sub> = 3.8 Hz), 123.2 (d, *J*<sub>CF</sub> = 271.2 Hz), 129.3, 130.2, (127.6, 129.2, 129.5, 129.7, 132.4 (q, *J*<sub>CF</sub> = 33.8 Hz), 133.5, 134.1, 140.2, 142.4; <sup>19</sup>F NMR (282 Hz, CDCl<sub>3</sub>)  $\delta$  -61.3; GCMS (M/z) 315.

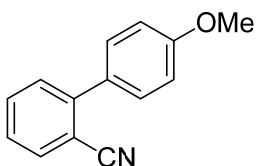

*2-(4-anisoyl)benzonitrile (15)*: The title compound **15** was obtained as a white solid (84 mg, 42% yield) after purification by silica gel column chromatography.  $^1\text{H}$  NMR (300 MHz,  $\text{CDCl}_3$ )  $\delta$  3.87 (s, 3H), 7.02 (d,  $J = 9.0$  Hz, 2H), 7.40 (dt,  $J = 7.5, 1.2$  Hz, 1H), 7.48-7.54 (m, 3H), 7.62 (dt,  $J = 7.8, 1.2$  Hz, 1H), 7.74 (dd,  $J = 7.5, 1.8$  Hz, 1H);  $^{13}\text{C}$  NMR (75 MHz,  $\text{CDCl}_3$ )  $\delta$  55.5, 111.2, 114.3, 119.1, 127.2, 130.0, 130.1, 130.6, 132.9, 133.9, 145.3, 160.2; HRMS (APPI) Calcd for  $\text{C}_{14}\text{H}_{11}\text{NO}$  (M) $^+$  209.0841, found 209.0843.

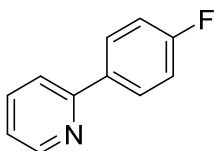

*2-(4-Fluorophenyl)pyridine (17)*: The title compound **17** was obtained as a colorless oil (128 mg, 74% yield) after purification by silica gel column chromatography.  $^1\text{H}$  NMR (300 MHz,  $\text{CDCl}_3$ )  $\delta$  7.12-7.26 (m, 3H), 7.65 (m, 2H), 7.95-8.01 (m, 2H), 8.66-8.68 (m, 1H);  $^{13}\text{C}$  NMR (75 MHz,  $\text{CDCl}_3$ )  $\delta$  115.8 (d,  $J_{\text{CF}} = 21.5$  Hz), 120.3, 122.2, 128.8 (d,  $J_{\text{CF}} = 8.3$  Hz), 135.7, 136.9, 149.8, 156.6, 163.7 (d,  $J_{\text{CF}} = 247.0$  Hz);  $^{19}\text{F}$  NMR (282 Hz,  $\text{CDCl}_3$ )  $\delta$  -111.6; HRMS (ESI) Calcd for  $\text{C}_{11}\text{H}_9\text{FN}$  (MH) $^+$  174.0719, found 174.0715.

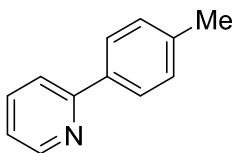

*2-(4-Tolyl)pyridine (18)*: The title compound **18** was obtained as a colorless oil (80 mg, 47% yield) after purification by silica gel column chromatography.  $^1\text{H}$  NMR (300 MHz,  $\text{CDCl}_3$ )  $\delta$  7.19-7.21 (m, 1H), 7.29 (d,  $J = 8.4$  Hz, 2H), 7.68-7.75 (m, 2H), 7.90 (d,  $J = 8.1$

Hz, 2H), 8.68 (dt,  $J = 3.9, 1.8$  Hz, 1H);  $^{13}\text{C}$  NMR (75 MHz,  $\text{CDCl}_3$ )  $\delta$  21.4, 120.3, 121.9, 126.9, 129.6, 136.8, 139.0, 149.7, 157.6; HRMS (ESI) Calcd for  $\text{C}_{12}\text{H}_{12}\text{N}$  ( $\text{MH}$ ) $^+$  170.0970, found 170.0964.

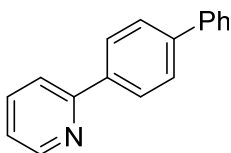

*2-(4-Biphenyl)pyridine (19)*: The title compound **19** was obtained as a white solid (141 mg, 61% yield) after purification by silica gel column chromatography.  $^1\text{H}$  NMR (300 MHz,  $\text{CDCl}_3$ )  $\delta$  7.05-7.09 (m, 1H), 7.18-7.23 (m, 1H), 7.27-7.33 (m, 2H), 7.48-7.90(m, 6H), 7.92 (d,  $J = 8.4$  Hz, 2H), 8.55 (dt,  $J = 4.8, 1.2$  Hz, 1H);  $^{13}\text{C}$  NMR (75 MHz,  $\text{CDCl}_3$ )  $\delta$  120.5, 122.2, 127.2, 127.4, 127.5, 127.6, 129.0, 136.8, 138.4, 140.7, 141.8, 149.8, 157.1; HRMS (ESI) Calcd for  $\text{C}_{17}\text{H}_{14}\text{N}$  ( $\text{MH}$ ) $^+$  232.1126, found 232.1120.

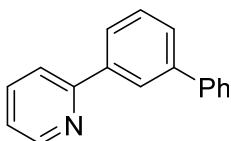

*2-(3-Biphenyl)pyridine (20)*: The title compound **20** was obtained as a greasy solid (194 mg, 84% yield) after purification by silica gel column chromatography.  $^1\text{H}$  NMR (300 MHz,  $\text{CDCl}_3$ )  $\delta$  7.34-7.39 (m, 1H), 7.46-7.52(m, 1H), 7.56-7.61 (m, 2H), 7.67 (t,  $J = 7.8$  Hz, 1H), 7.76-7.83 (m, 5H), 8.09 (dt,  $J = 7.5, 1.2$  Hz, 1H), 8.37 (t,  $J = 1.8$  Hz, 1H), 8.85 (ddd,  $J = 4.8, 2.4, 1.2$  Hz, 1H);  $^{13}\text{C}$  NMR (75 MHz,  $\text{CDCl}_3$ )  $\delta$  120.8, 122.4, 125.9, 126.0, 127.4, 127.5, 127.9, 128.9, 129.3, 136.9, 140.1, 141.2, 141.9, 149.8, 157.5; HRMS (ESI) Calcd for  $\text{C}_{17}\text{H}_{14}\text{N}$  ( $\text{MH}$ ) $^+$  232.1126, found 232.1125.

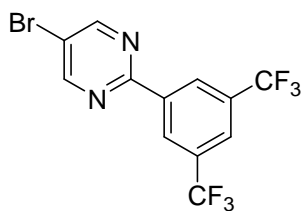

*5-Bromo-2-[3,5-bis(trifluoromethyl)phenyl]Pyrimidine (21)*: The title compound **21** was obtained as a white solid (204 mg, 55% yield) after purification by silica gel column chromatography.  $^1\text{H}$  NMR (300 MHz,  $\text{CDCl}_3$ )  $\delta$  8.00 (s, 1H), 8.90-8.92 (m, 4H);  $^{13}\text{C}$  NMR (75 MHz,  $\text{CDCl}_3$ )  $\delta$  118.0, 120.1, 121.6, 124.5, 125.2, 128.4, 132.4 (q,  $J_{\text{CF}} = 33.2$  Hz), 138.7, 158.4, 160.1;  $^{19}\text{F}$  NMR (282 Hz,  $\text{CDCl}_3$ )  $\delta$  -61.3; GCMS (M/z) 371.

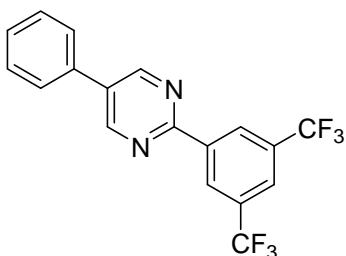

*5-Phenyl-2-[3,5-bis(trifluoromethyl)phenyl]Pyrimidine (22)*: The title compound **22** was obtained as a white solid (224.7 mg, 61% yield) after purification by silica gel column chromatography.  $^1\text{H}$  NMR (300 MHz,  $\text{CDCl}_3$ )  $\delta$  7.49-7.59 (m, 3H), 7.63-7.67 (m, 2H), 8.00 (s, 1H), 9.01 (s, 2H), 9.08 (s, 2H);  $^{13}\text{C}$  NMR (75 MHz,  $\text{CDCl}_3$ )  $\delta$  121.8, 124.2, 125.4, 127.1, 128.4, 129.4, 129.7, 132.3 (q,  $J_{\text{CF}} = 33.2$  Hz), 133.3, 134.1, 139.6, 155.6, 158.4, 160.7;  $^{19}\text{F}$  NMR (282 Hz,  $\text{CDCl}_3$ )  $\delta$  -61.3; GCMS (M/z) 368.

### 3. Reference

1. Berini, C.; Navarro, O.; *Chem. Commun.* **2012**, 48, 1538.

## 4. NMR Spectra

sg-4-187-col-47-1H.1.fid  
sg-4-187-col-47-1H

8.51  
8.50  
7.50  
7.50  
7.49  
7.49  
7.39  
7.38  
7.37  
7.36  
7.31  
7.30  
7.30  
7.29  
7.28  
7.28  
7.26  
7.26

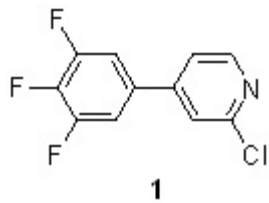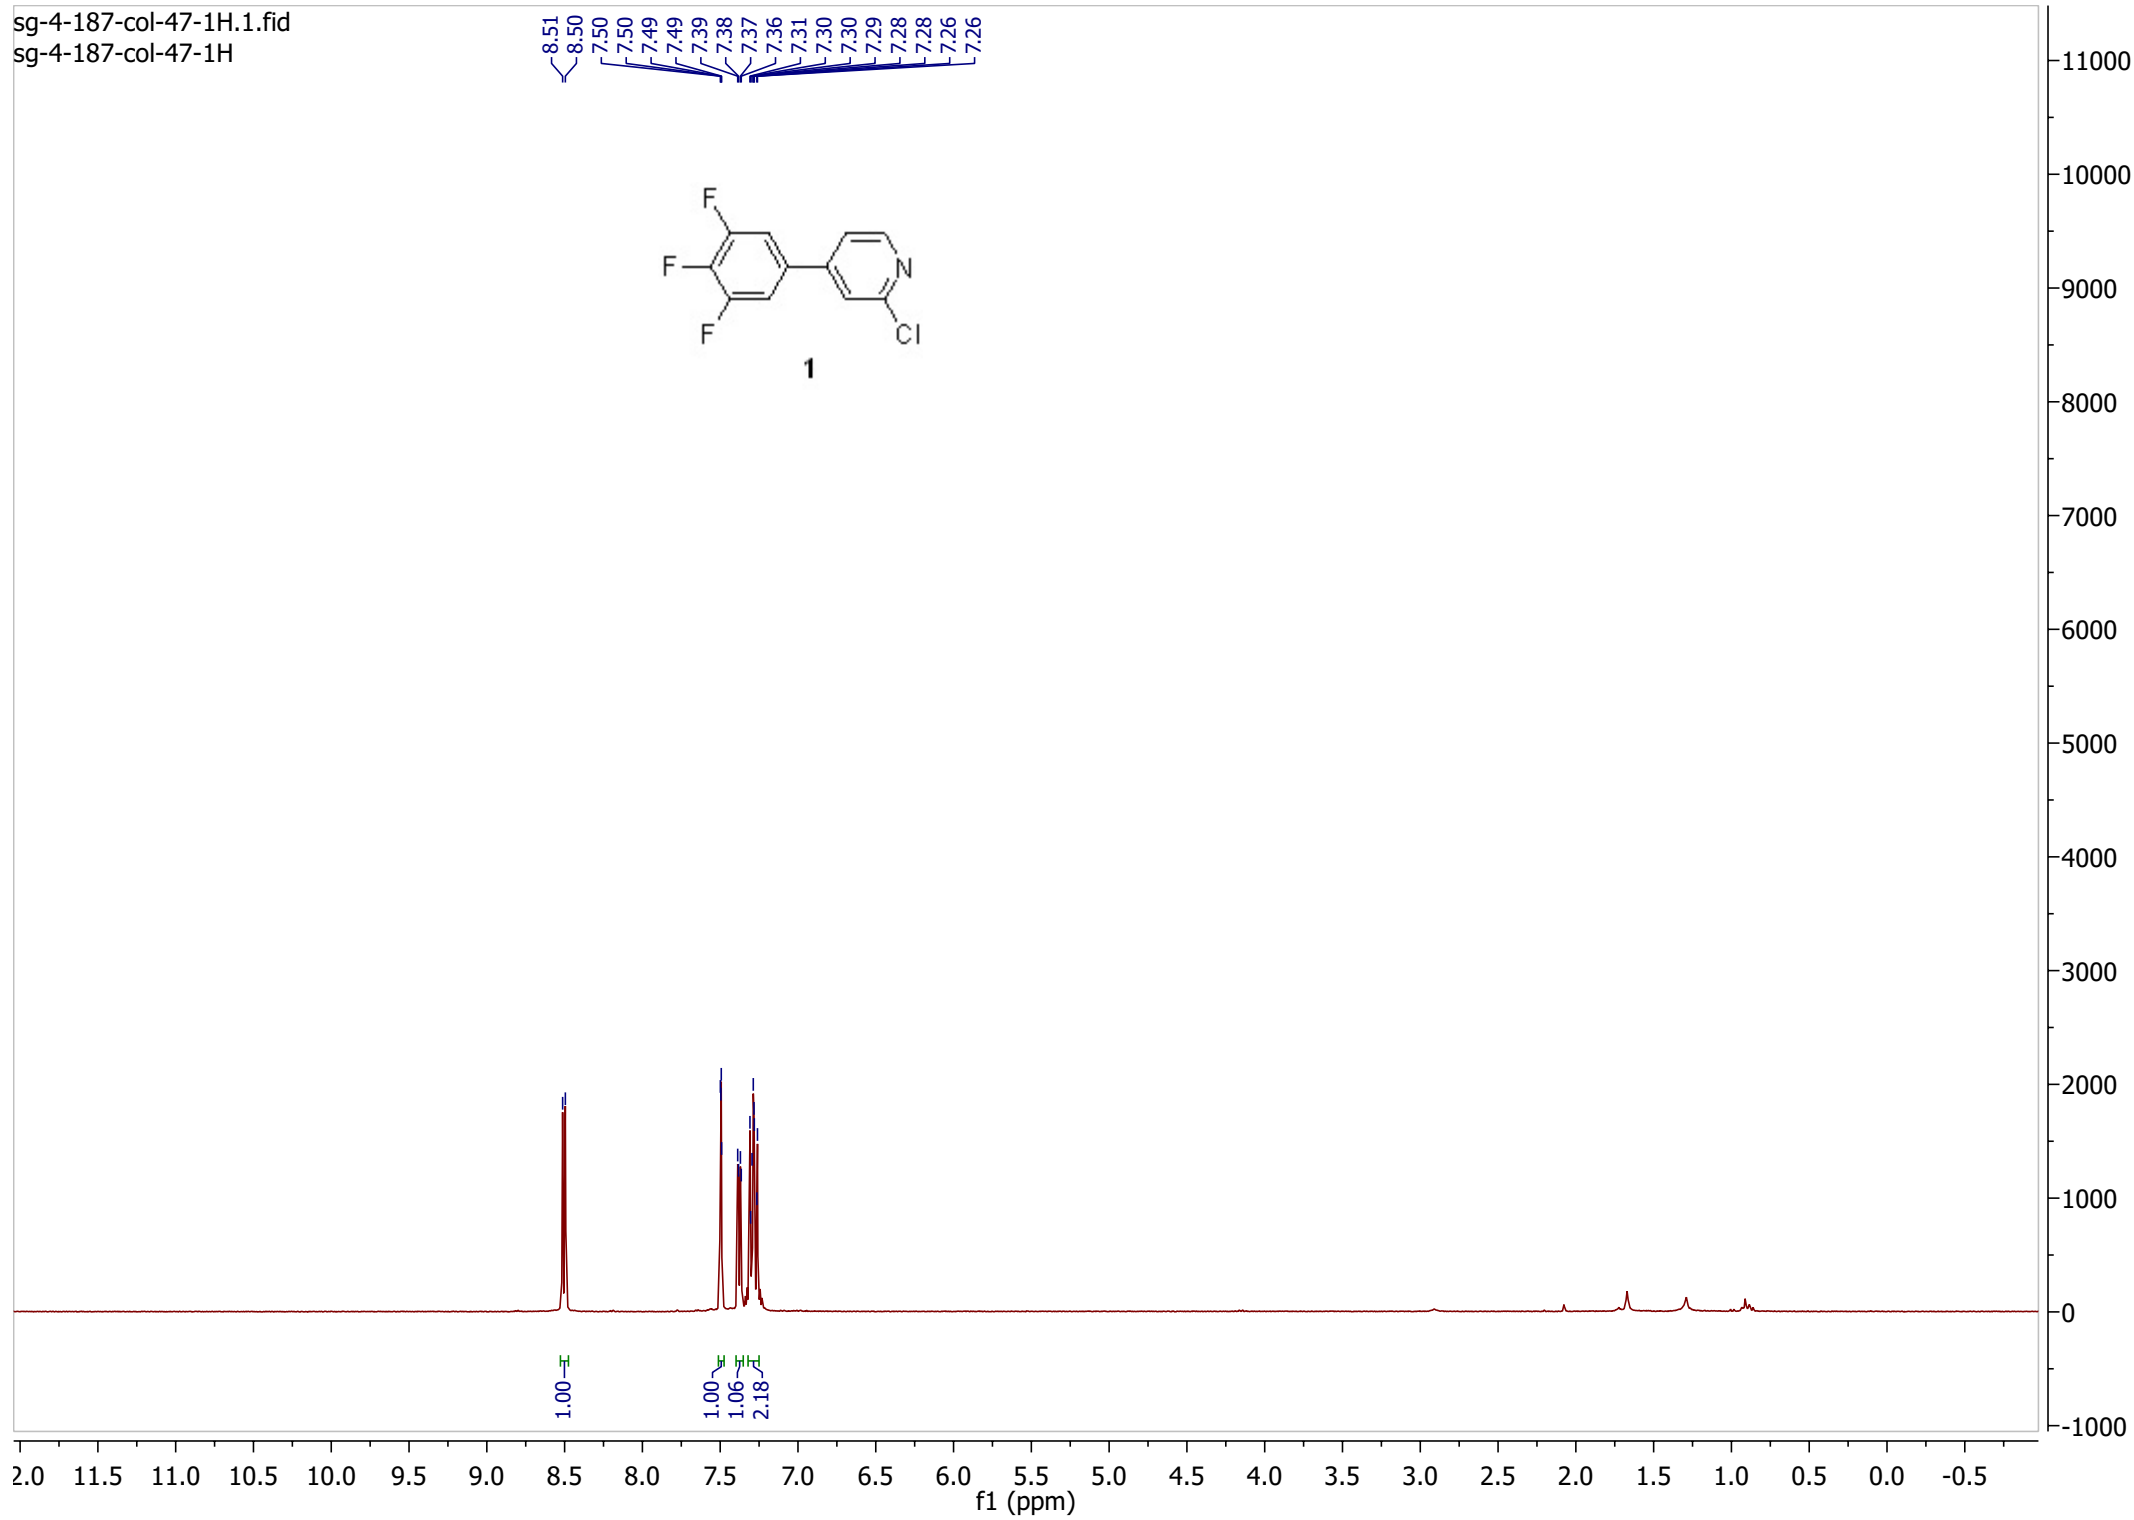

SG-4-187-13C-1.1.fid  
SG-4-187-13C-1

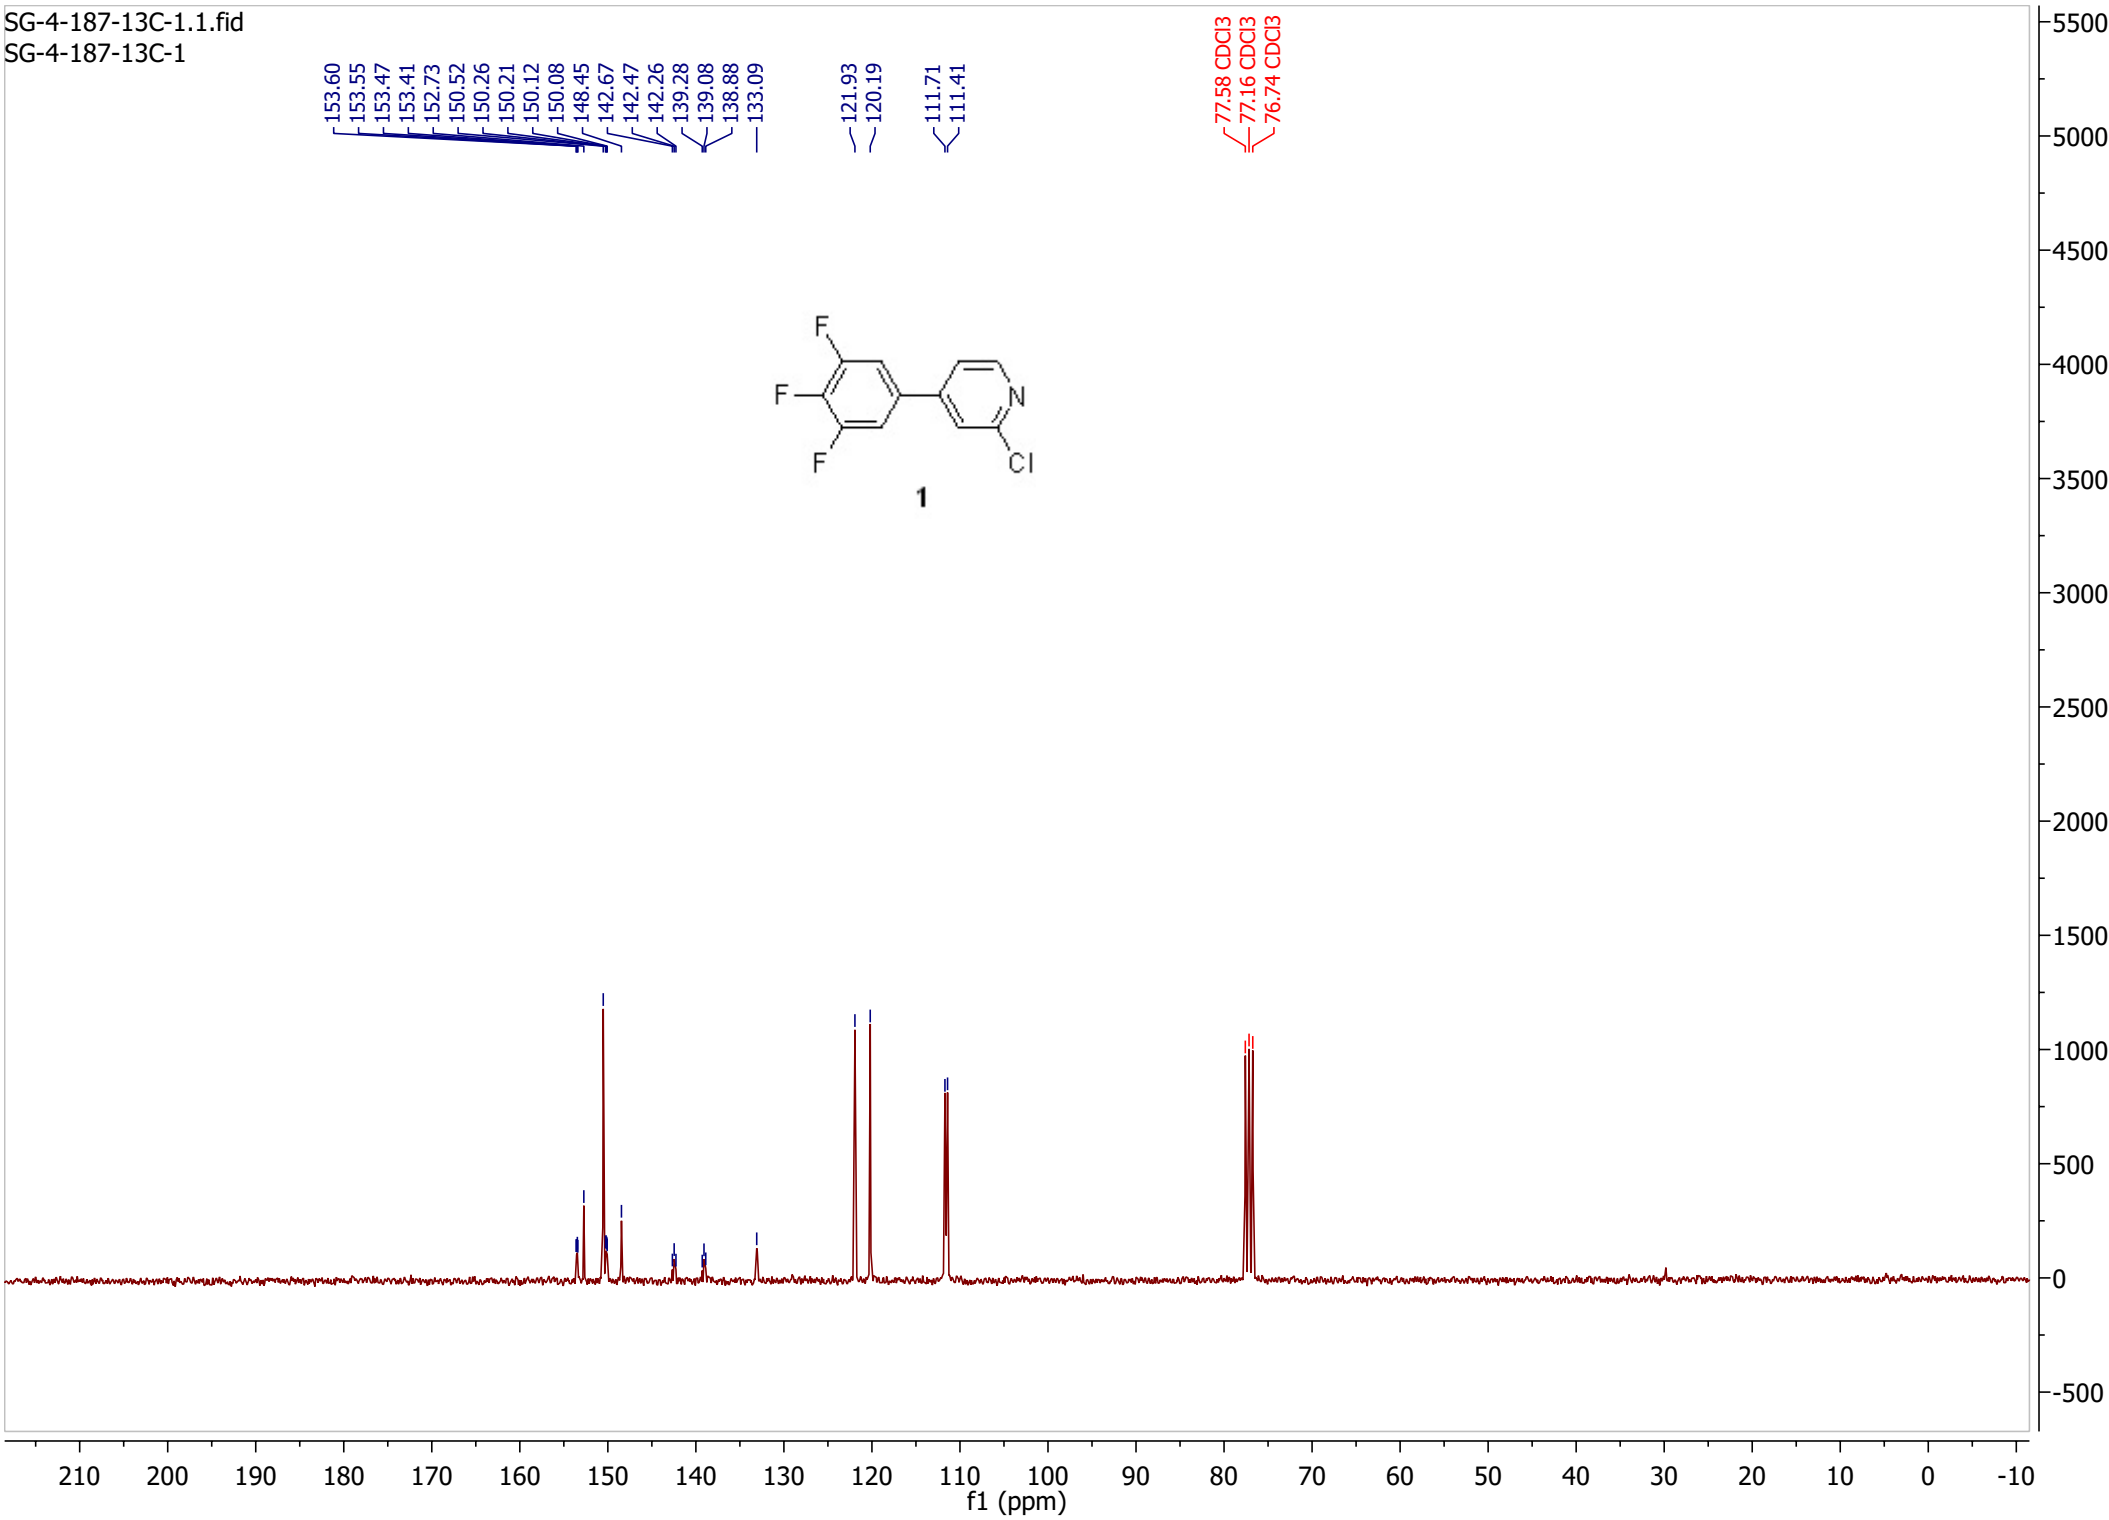



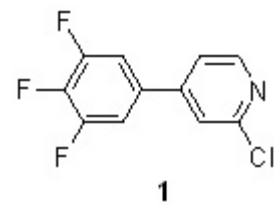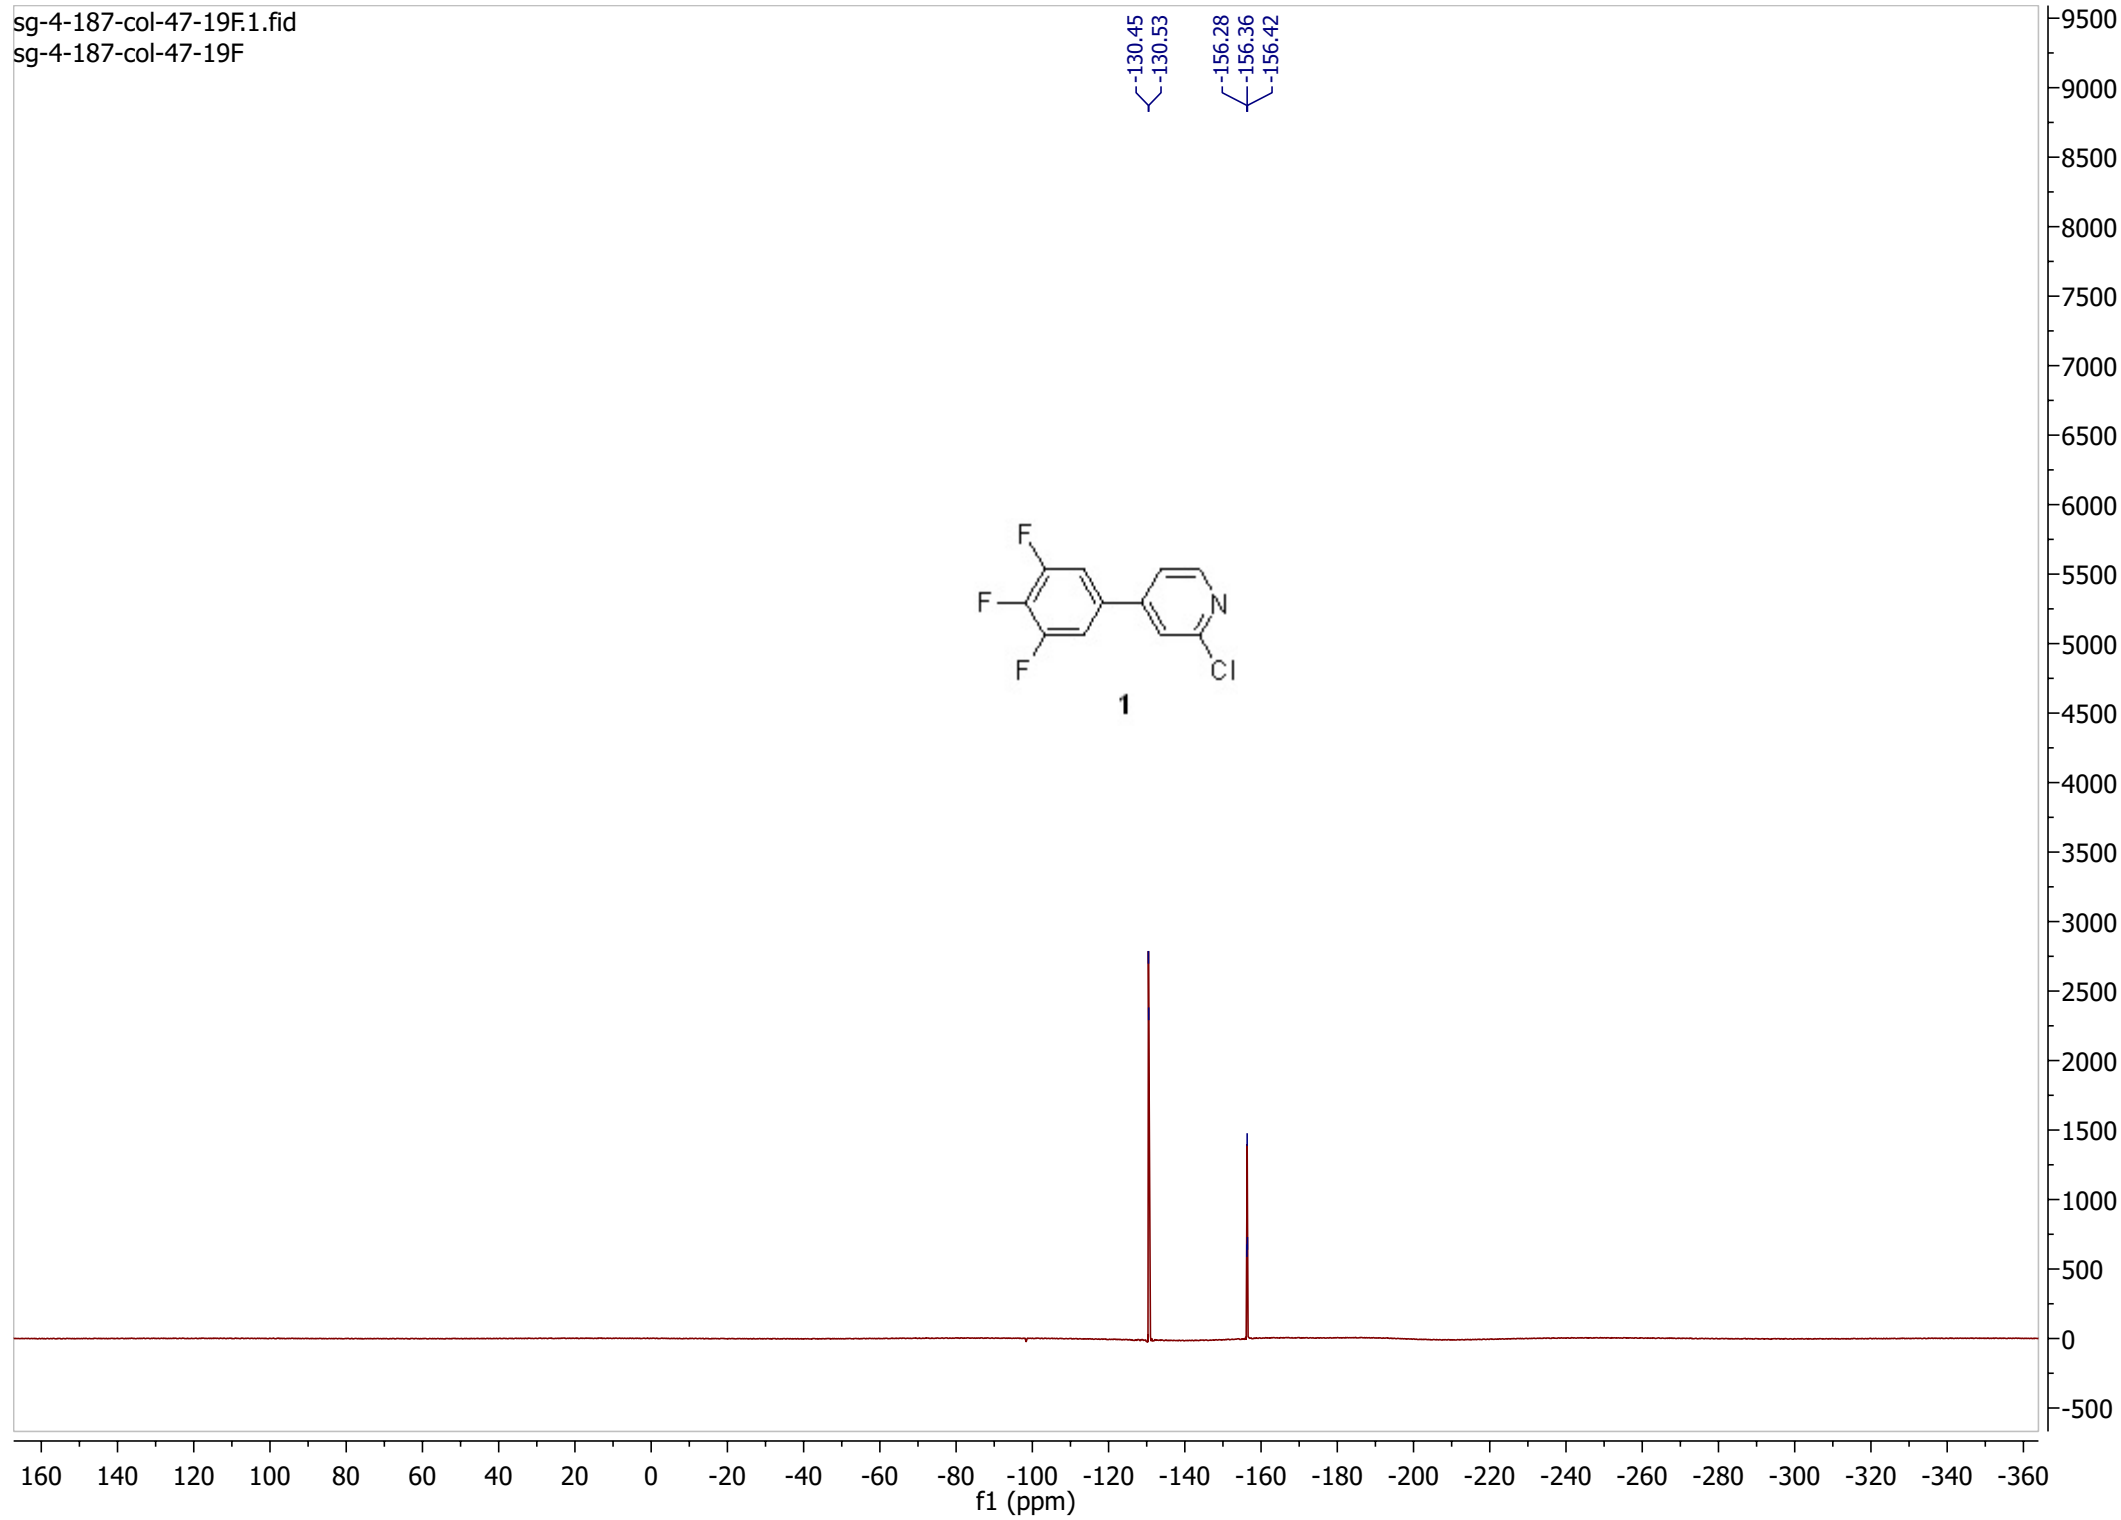

sg-4-184-col-67.1.fid  
sg-4-184-col-67

7.69  
7.69  
7.68  
7.65  
7.65  
7.59  
7.56  
7.51  
7.48  
7.48  
7.46  
7.41  
7.40  
7.39  
7.38  
7.37  
7.35  
7.31  
7.31  
7.31  
7.30  
7.29  
7.29  
7.28  
7.28  
7.28  
7.26  
7.26

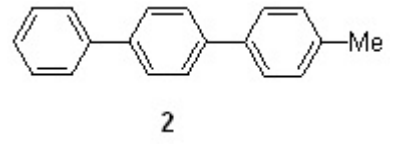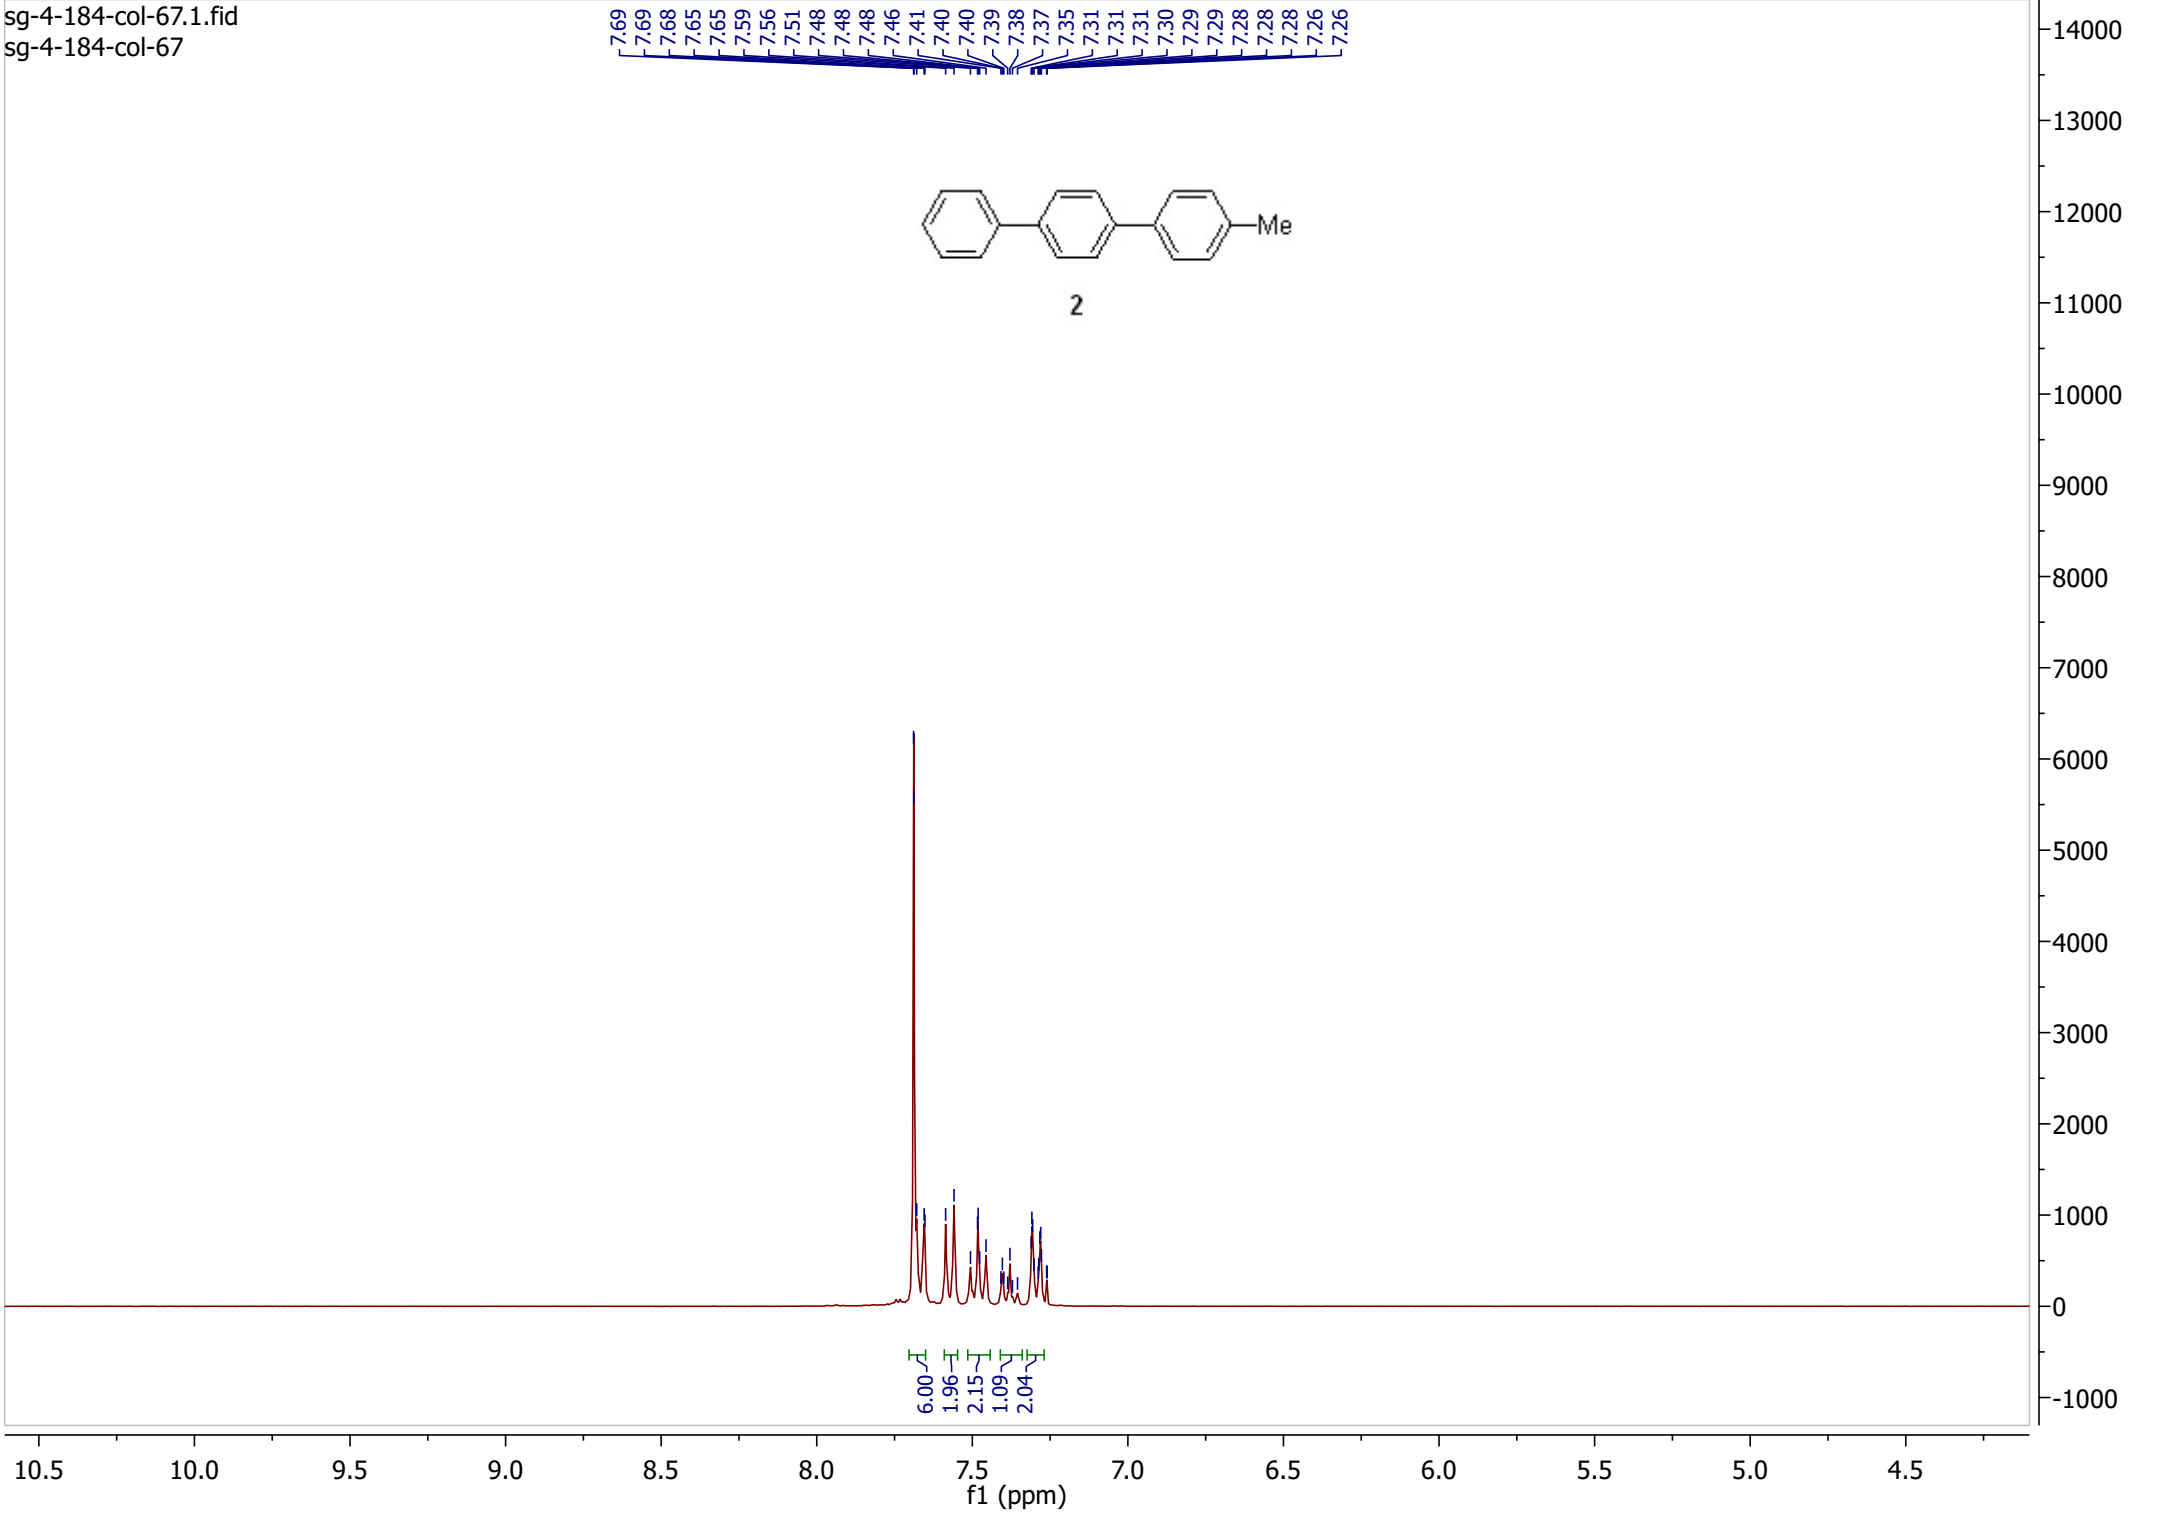

sg-4-184-13C.1.fid  
sg-4-184-13C

140.90  
140.18  
139.95  
137.93  
137.26  
129.68  
128.93  
127.59  
127.41  
127.15  
127.01

77.58 CDCl3  
77.16 CDCl3  
76.73 CDCl3

21.27

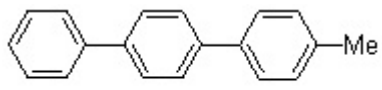

2

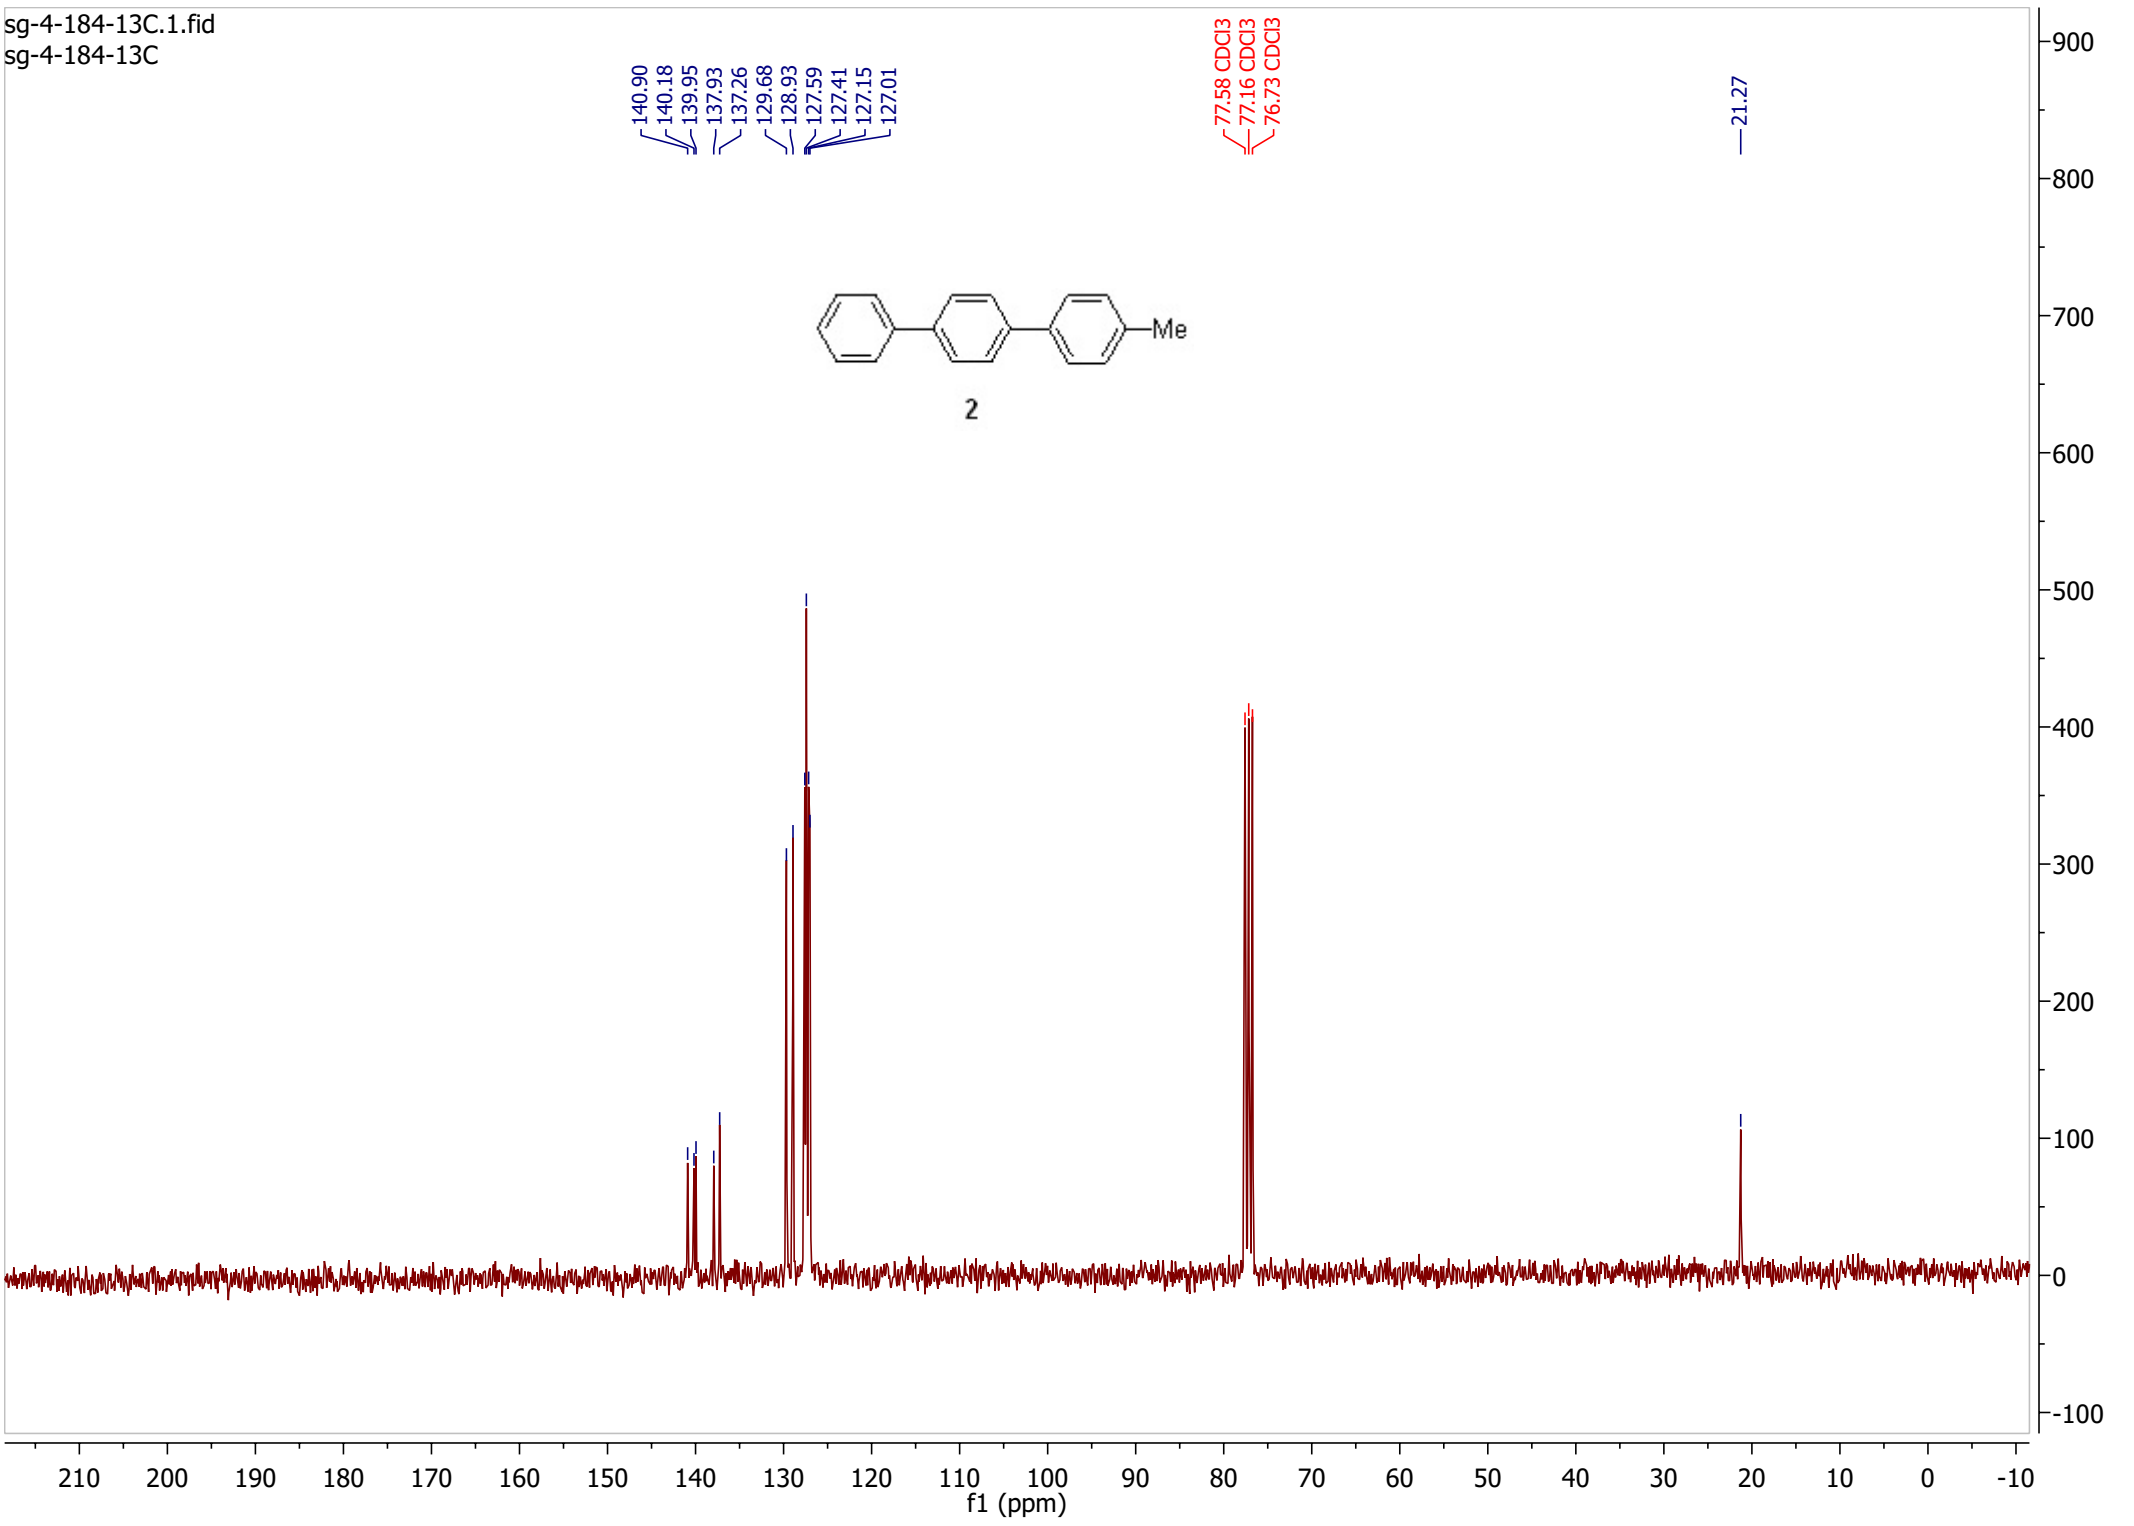

sg-4-180-col-165.1  
sg-4-180-col-165

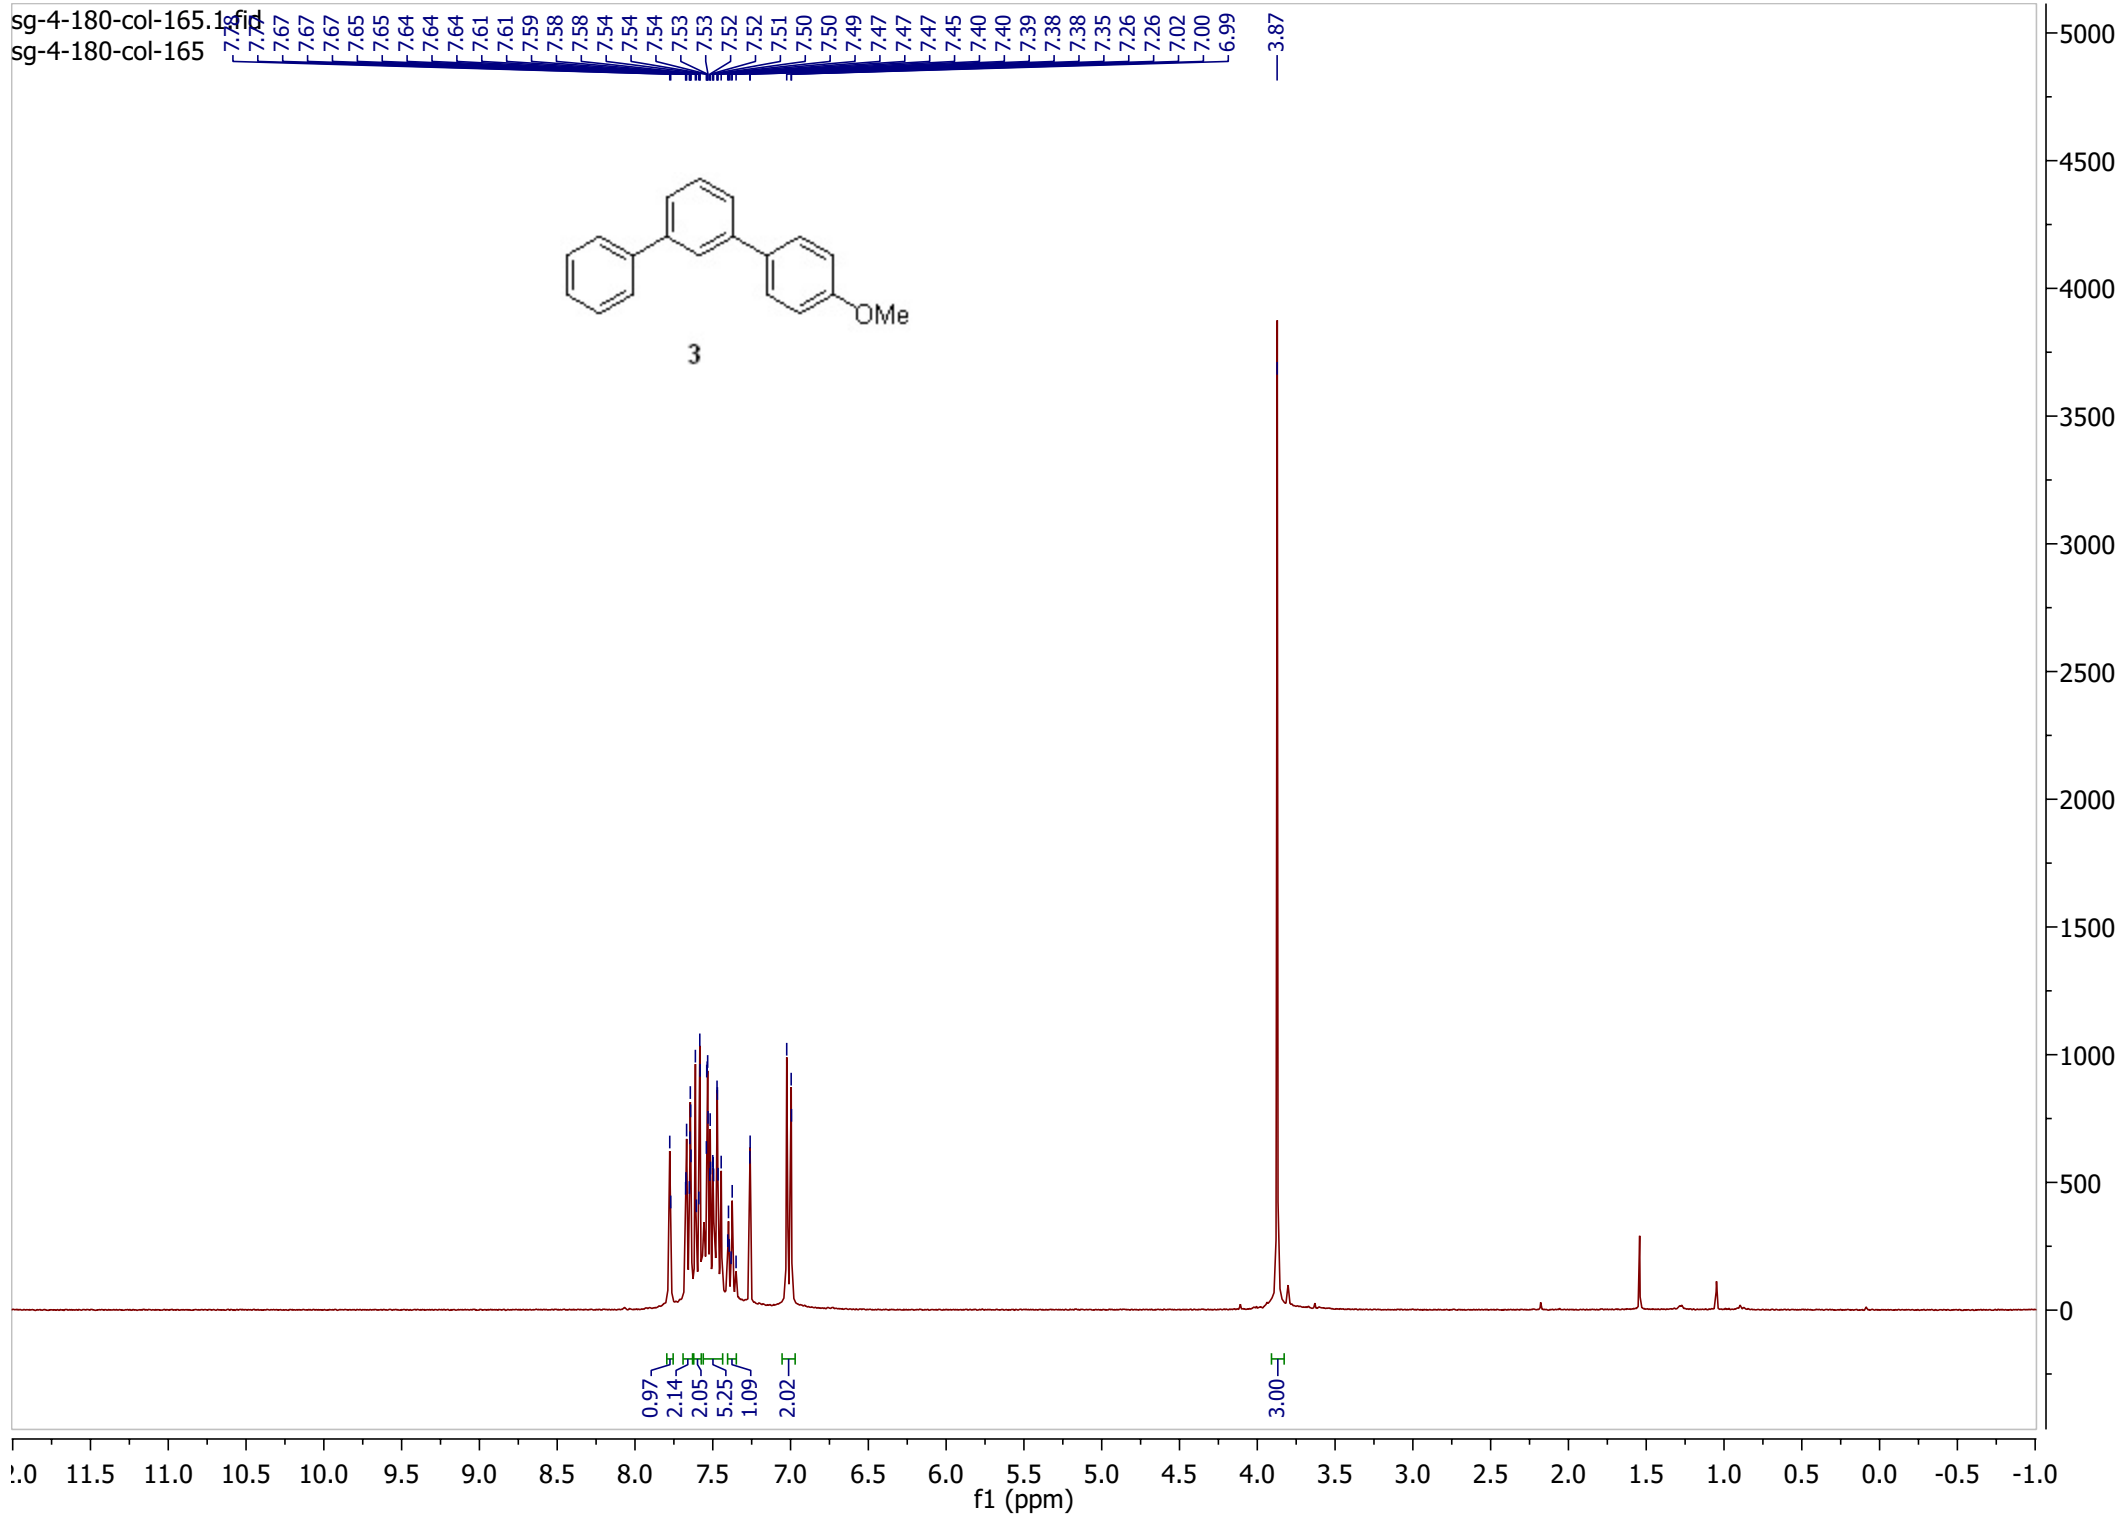

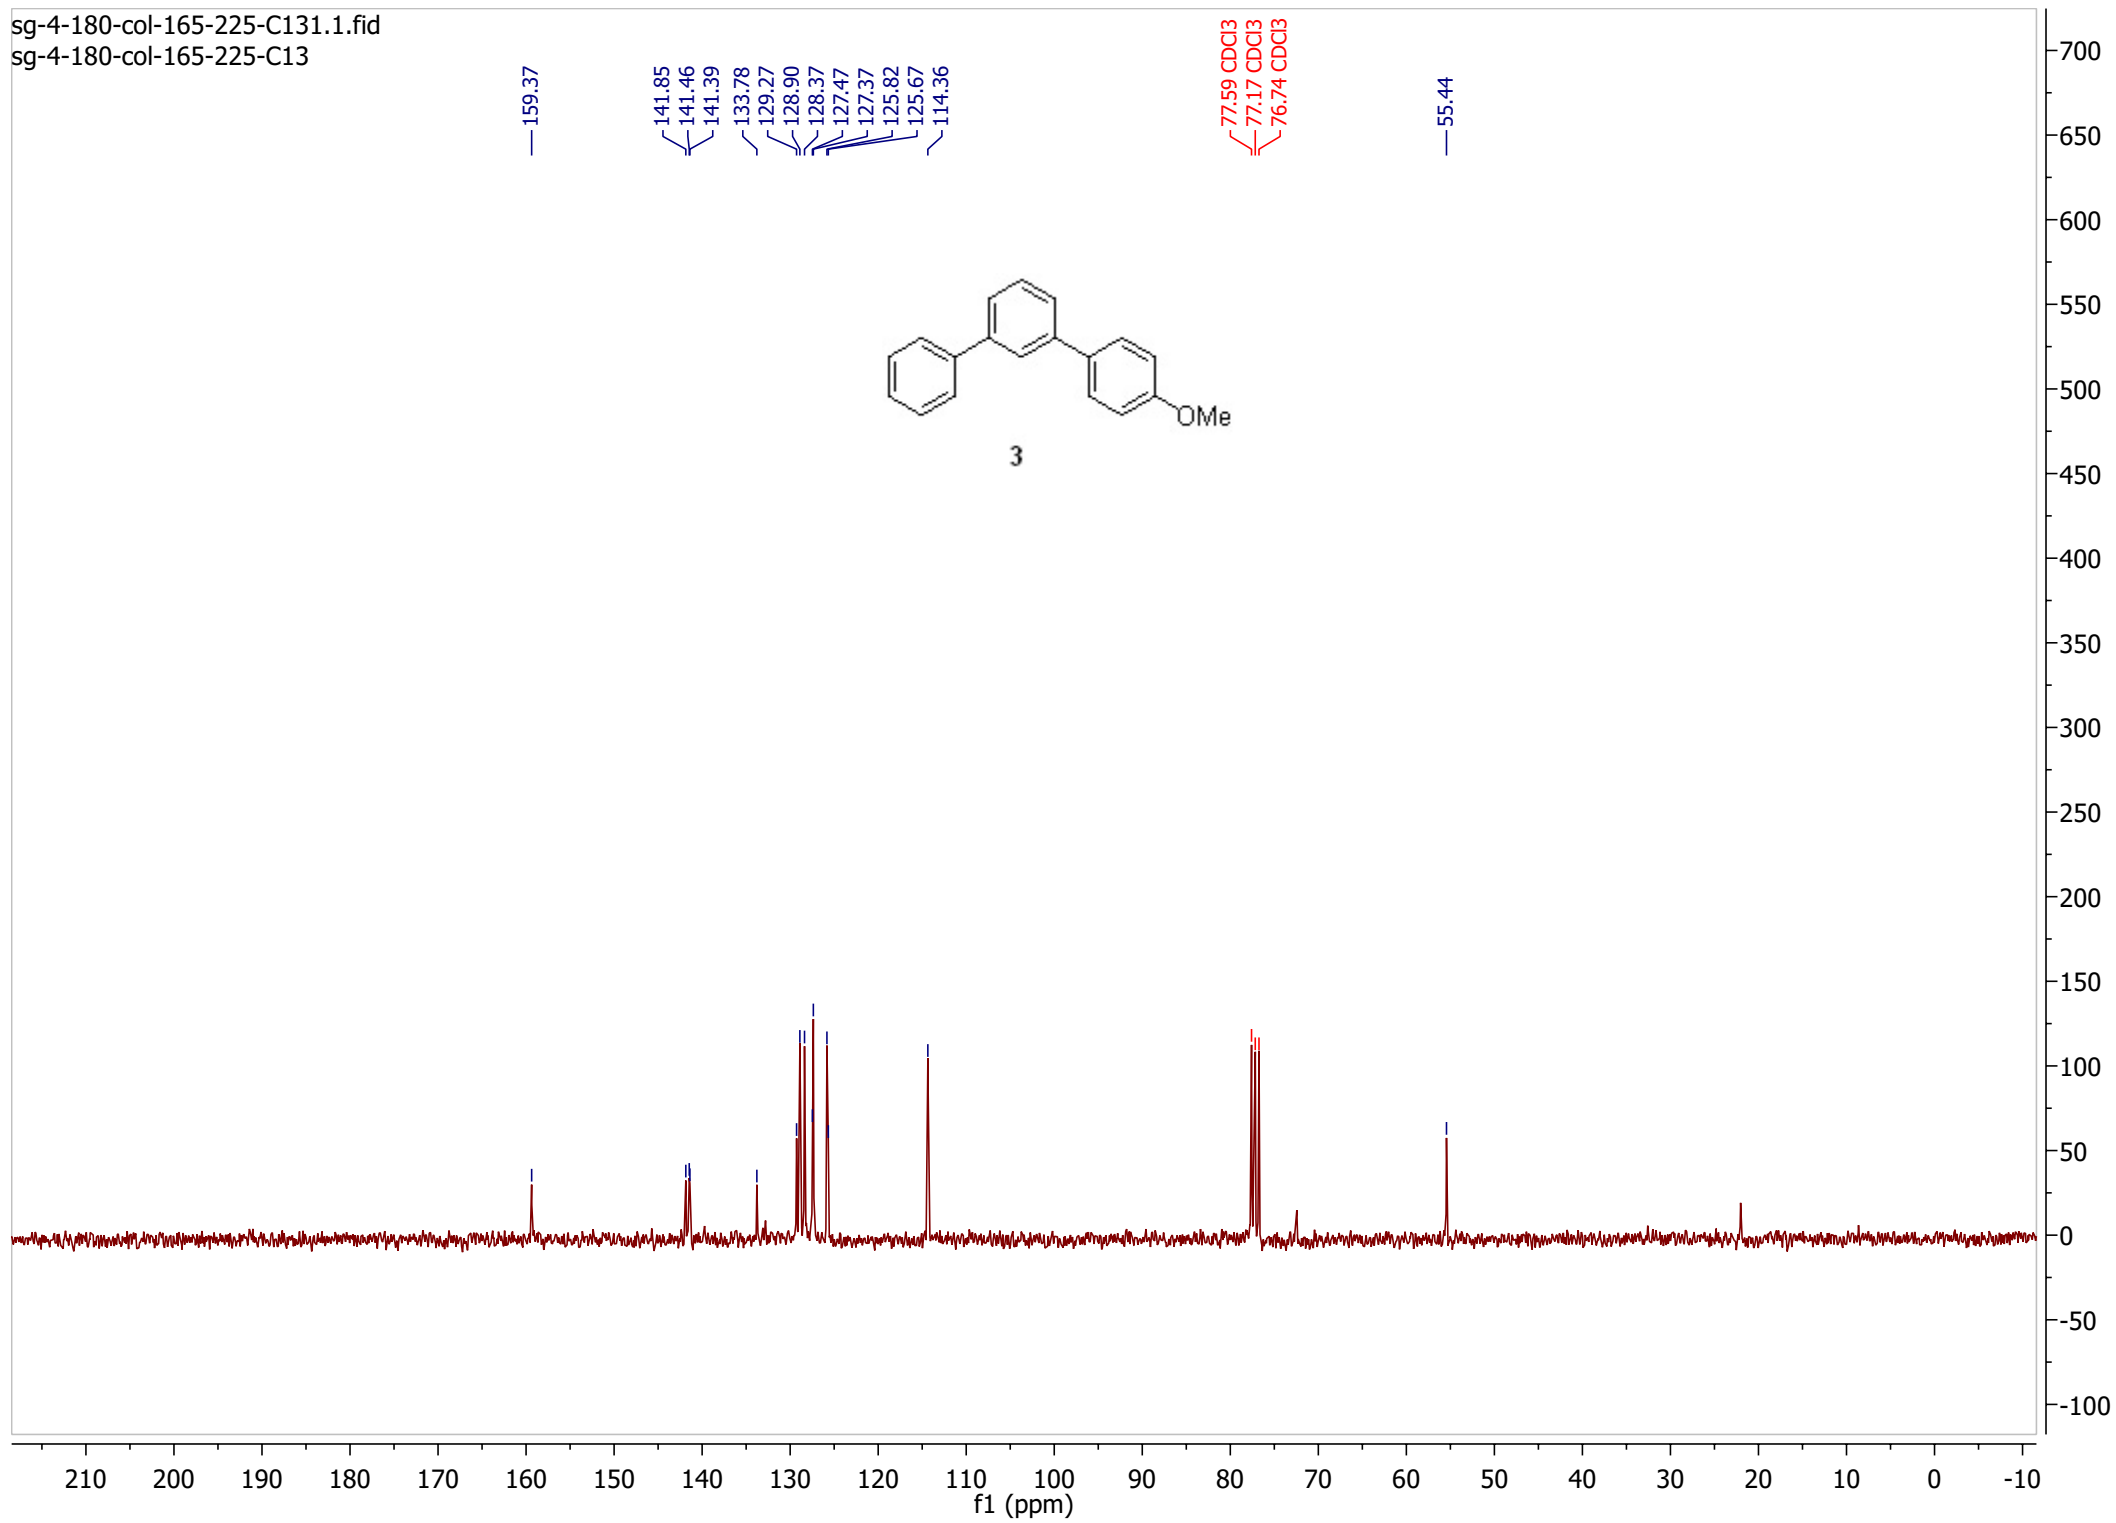

sg-4-185-col-79-81.1.fid  
sg-4-185-col-79-81

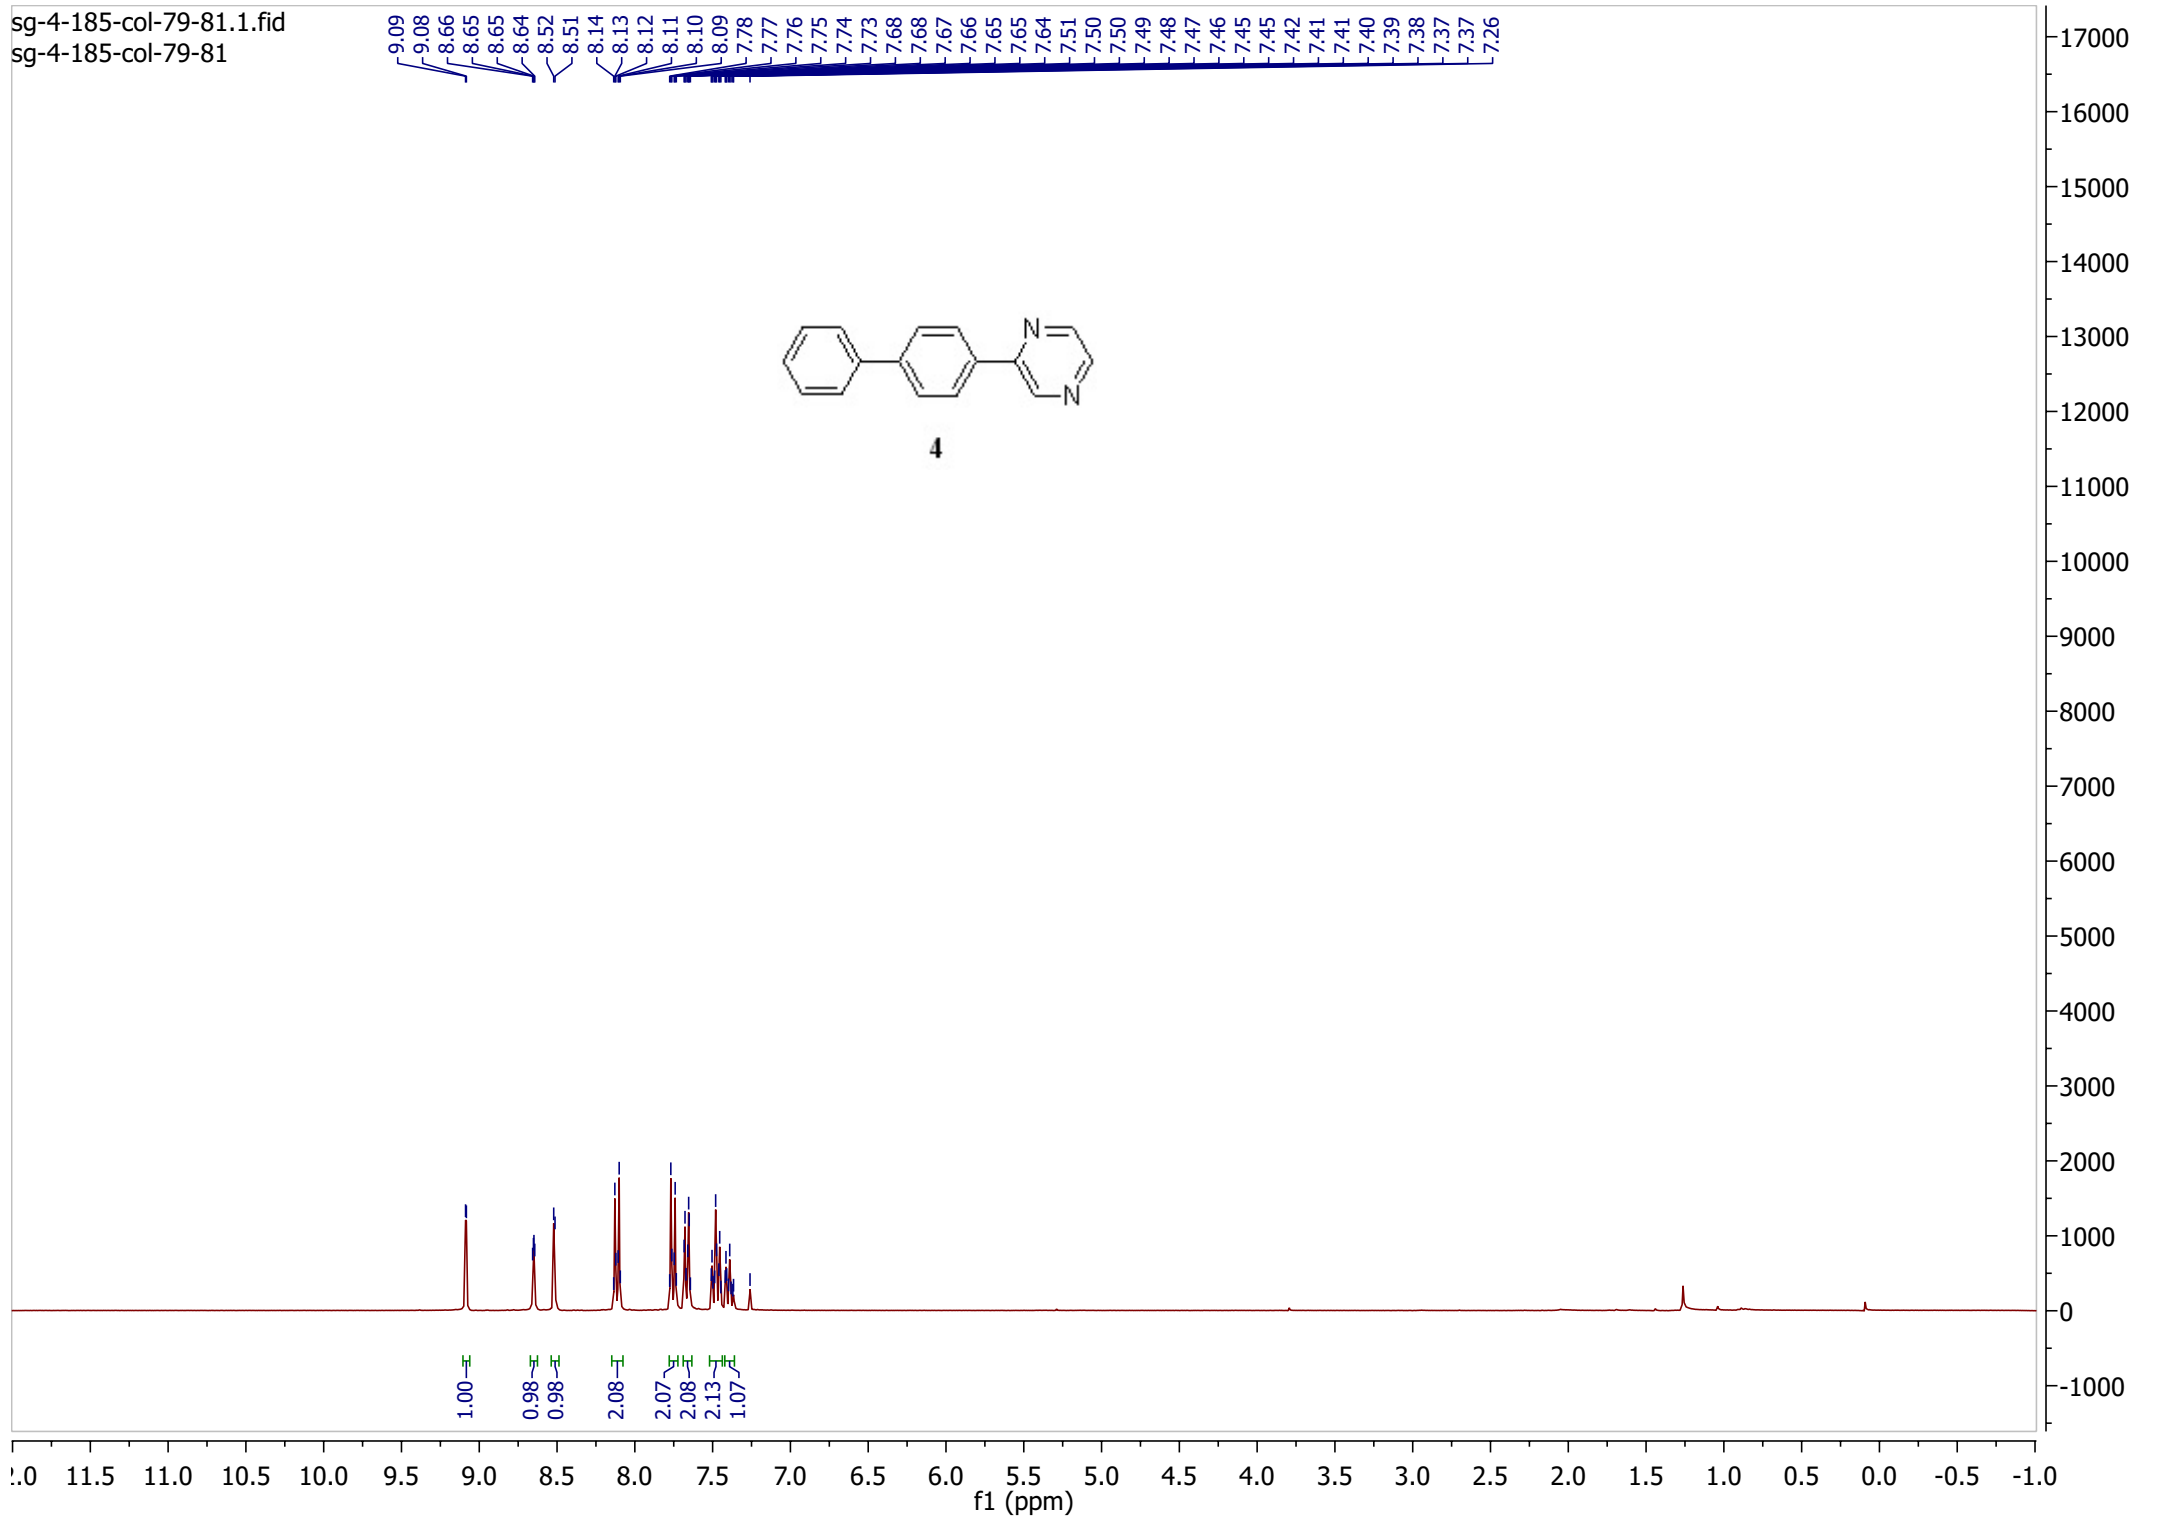

sg-4-185-col-79-81-13C.1.fid  
sg-4-185-col-79-81-13C

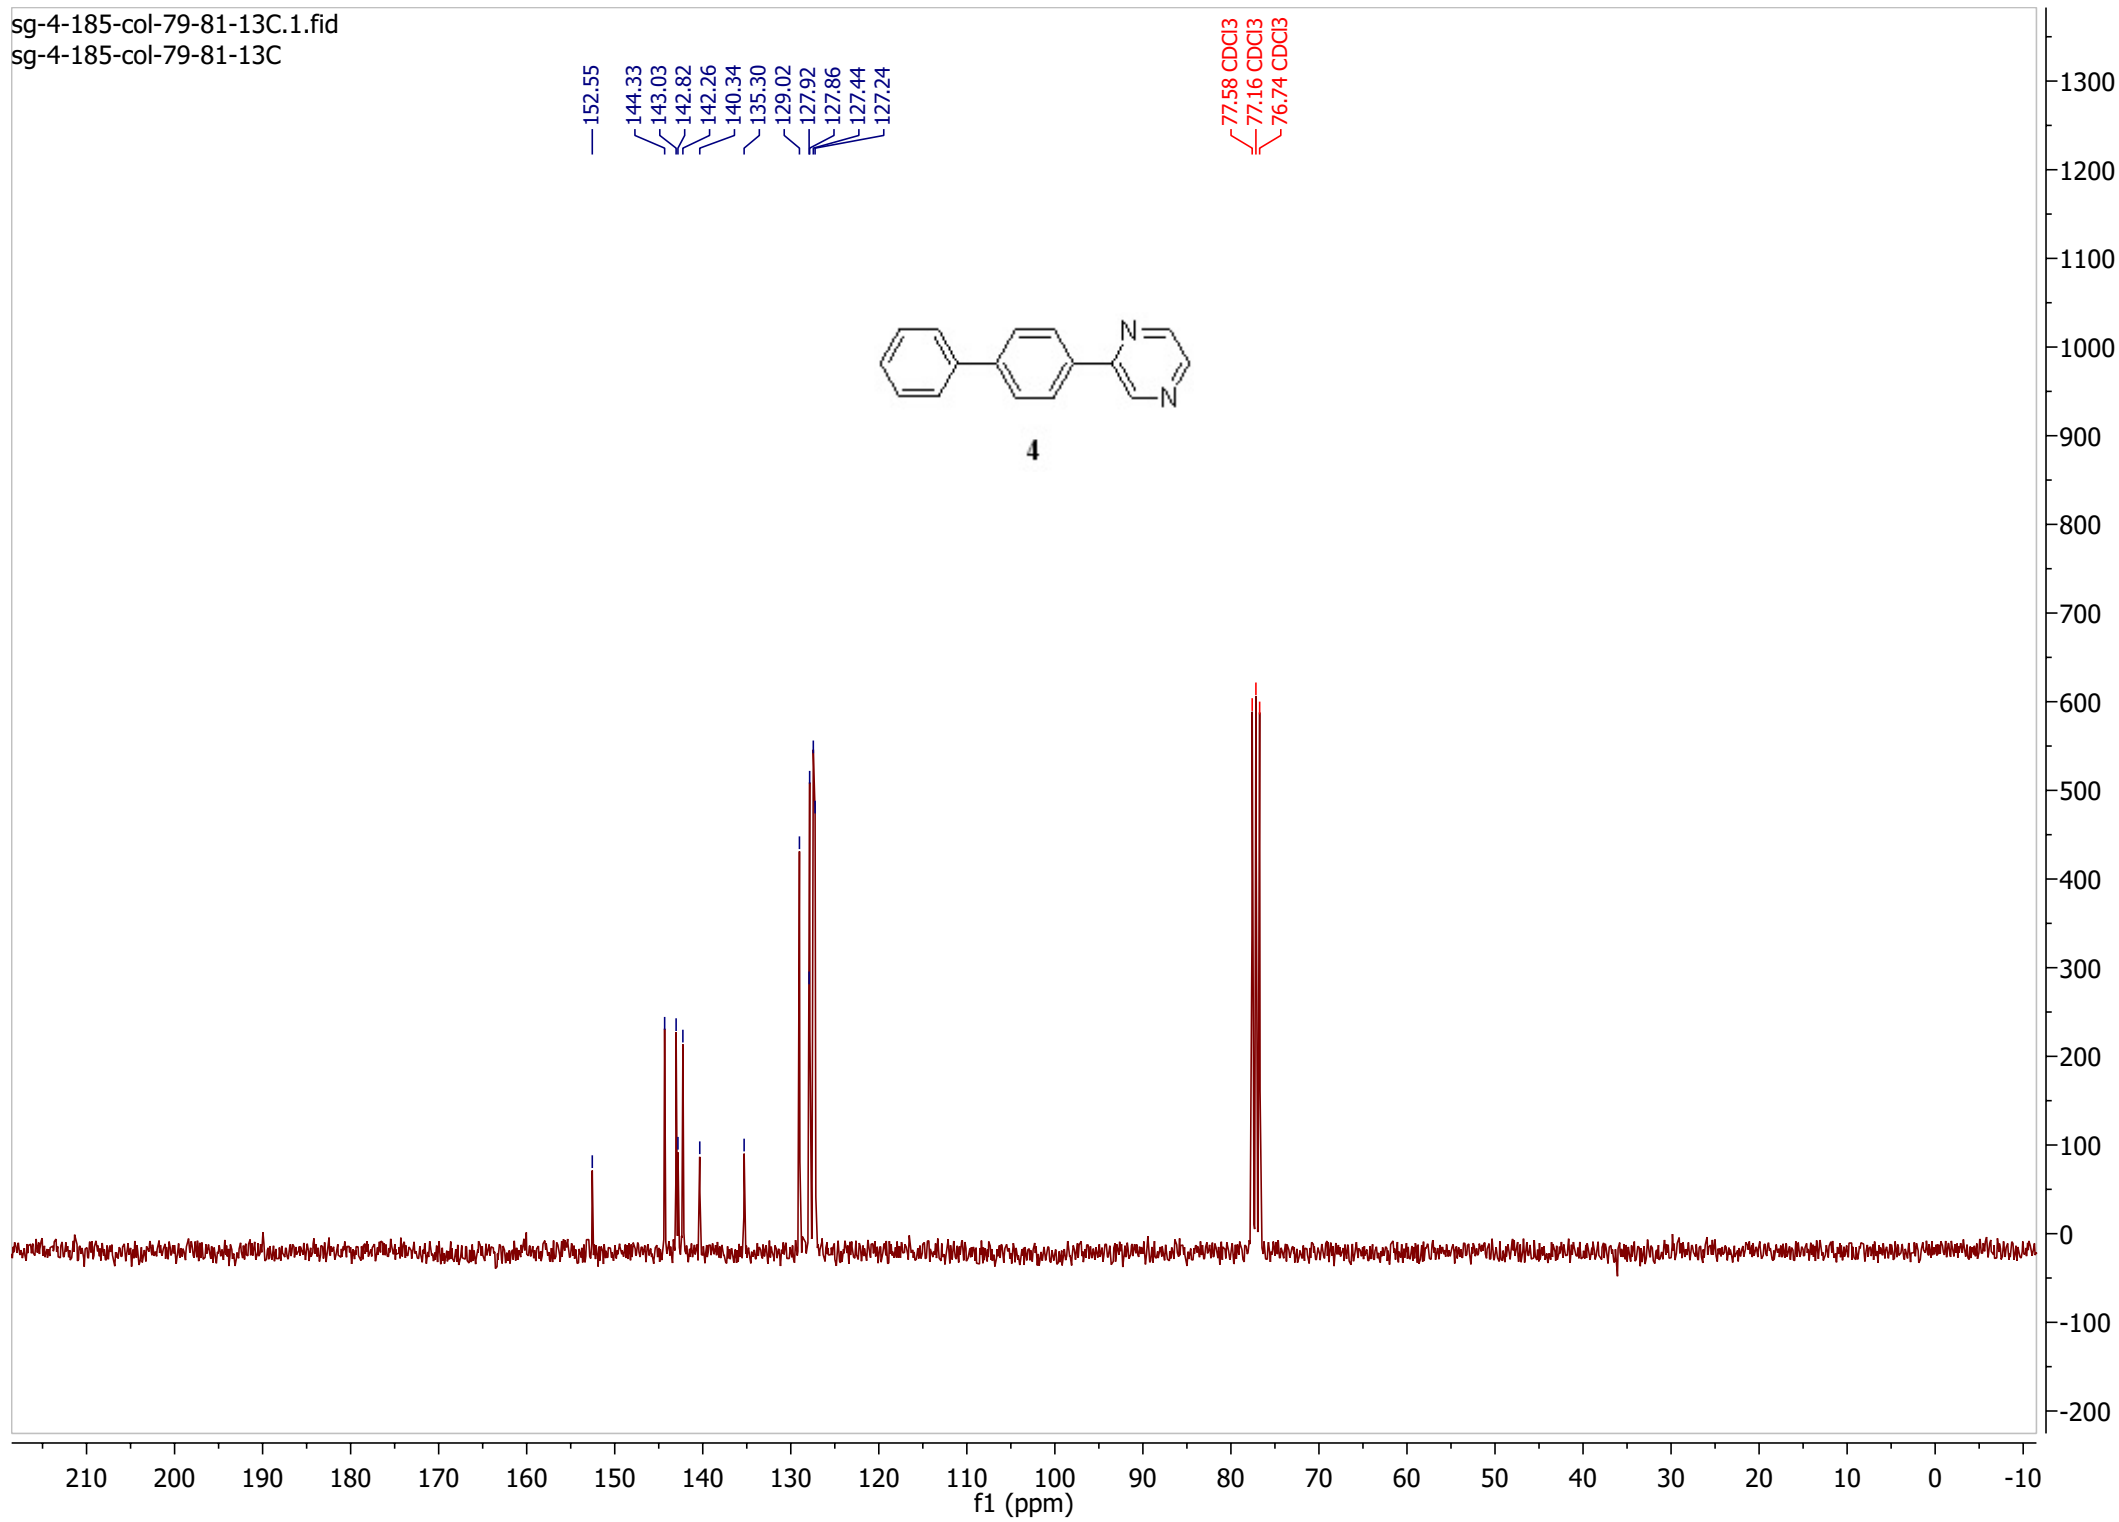

7.62  
7.60  
7.59  
7.57  
7.26  
7.18  
7.15  
7.12

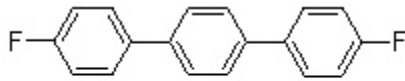

5

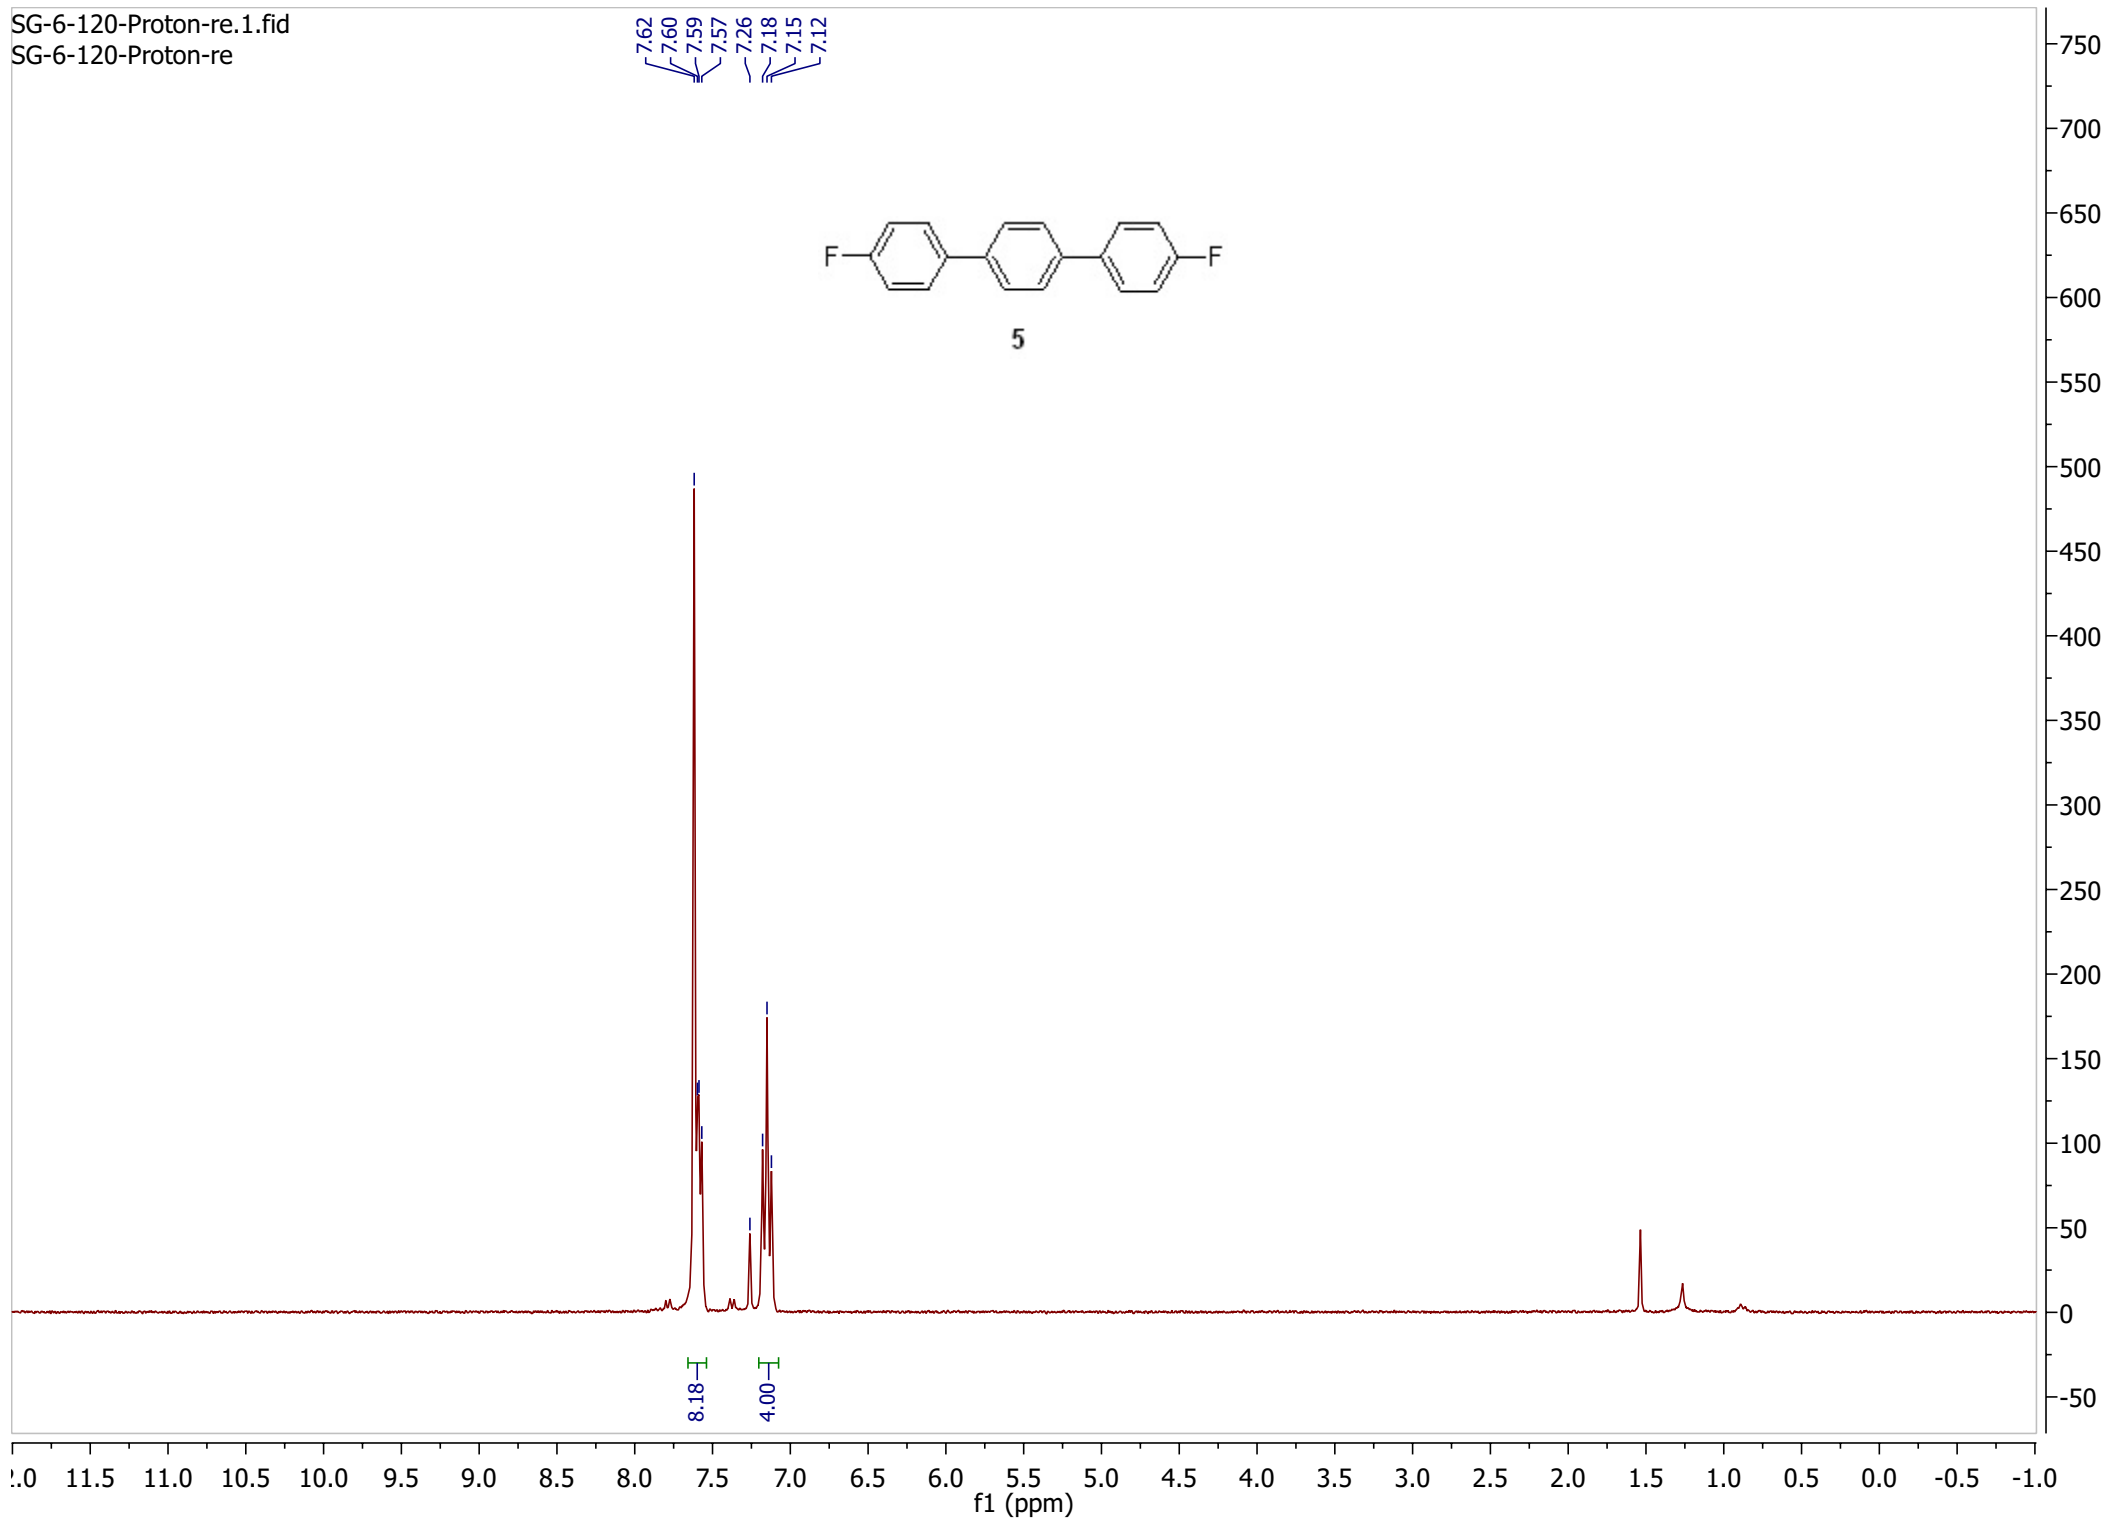



SG-6-120-19F.1.fid  
SG-6-120-19F

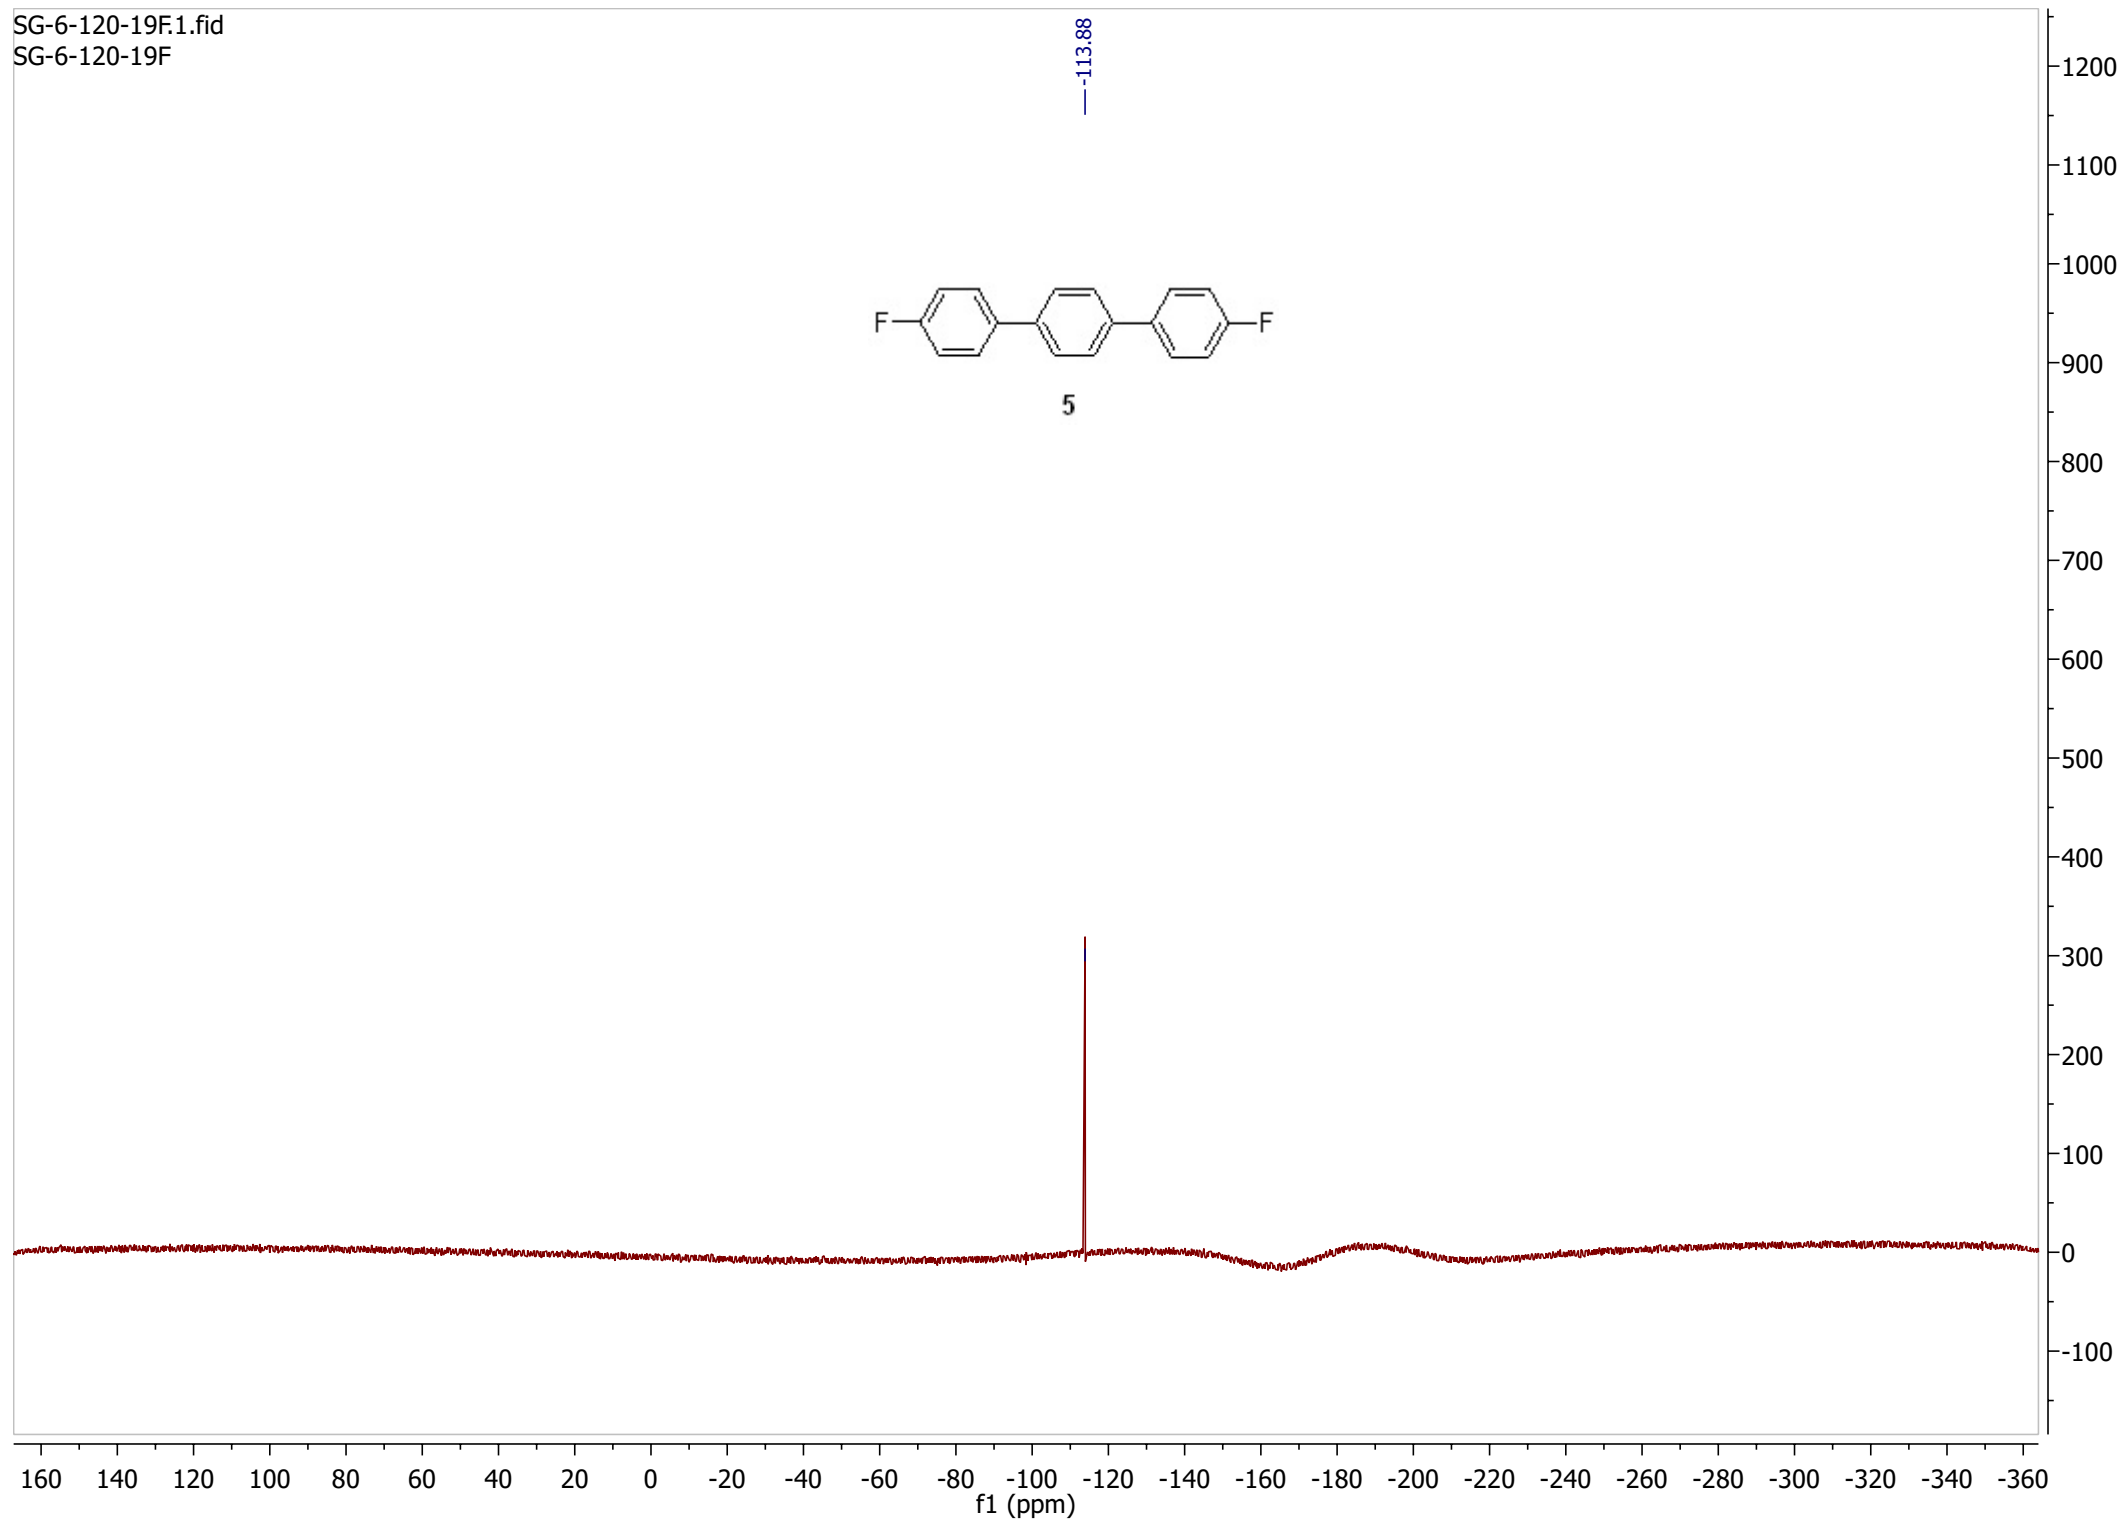

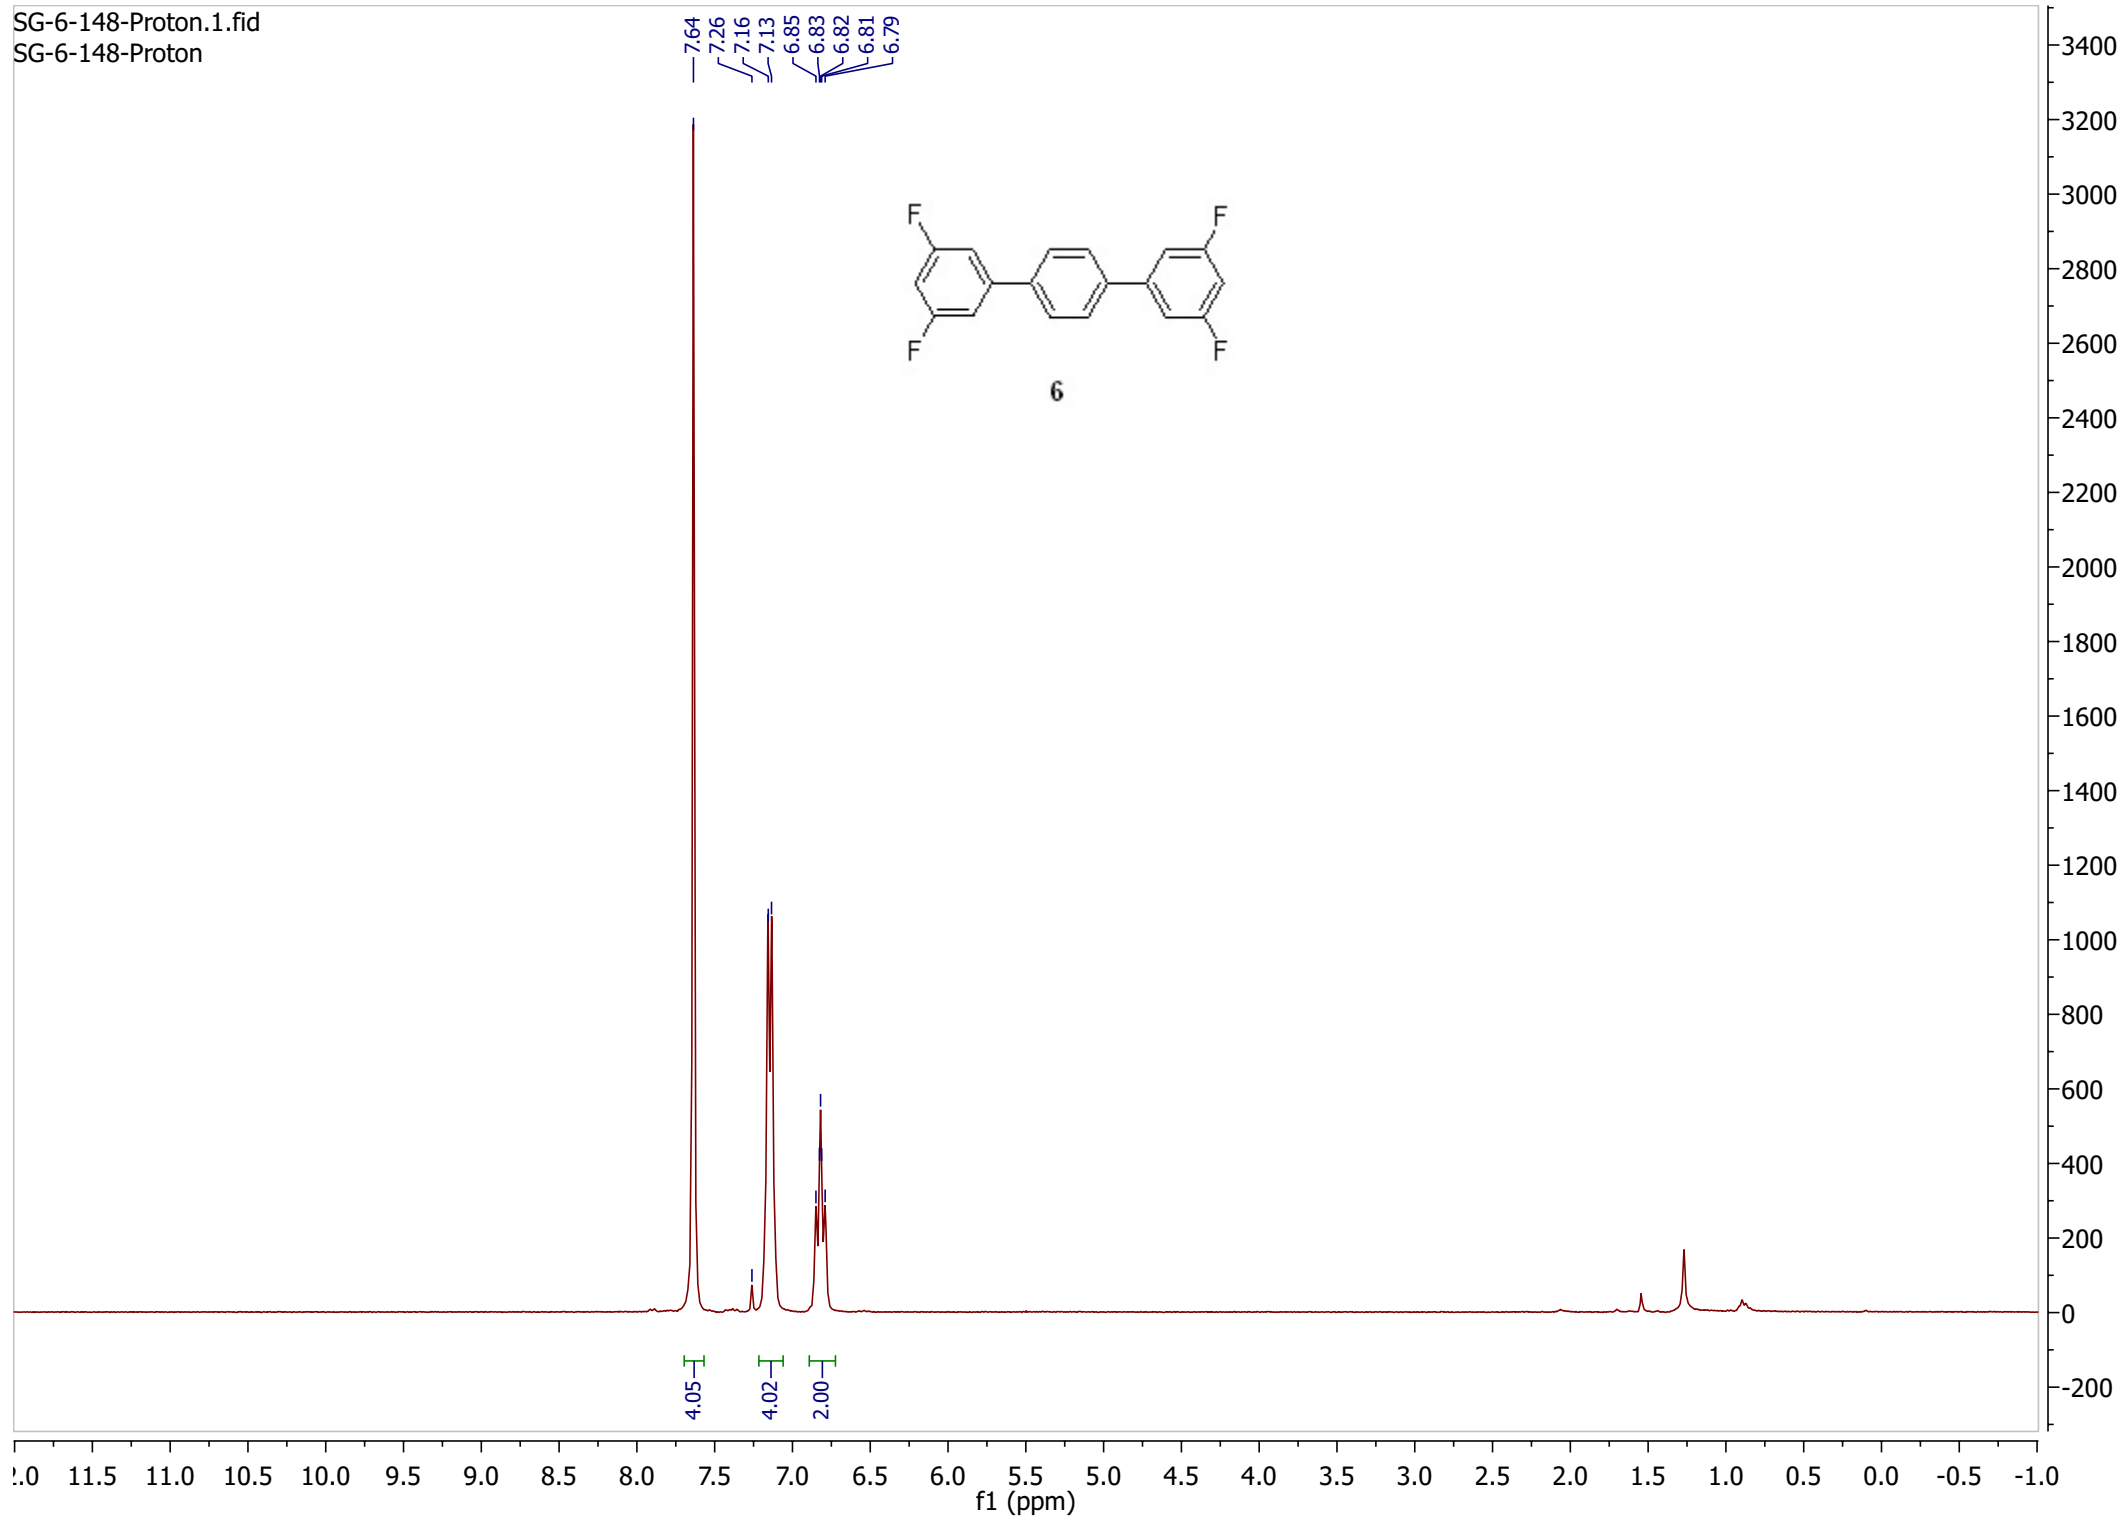

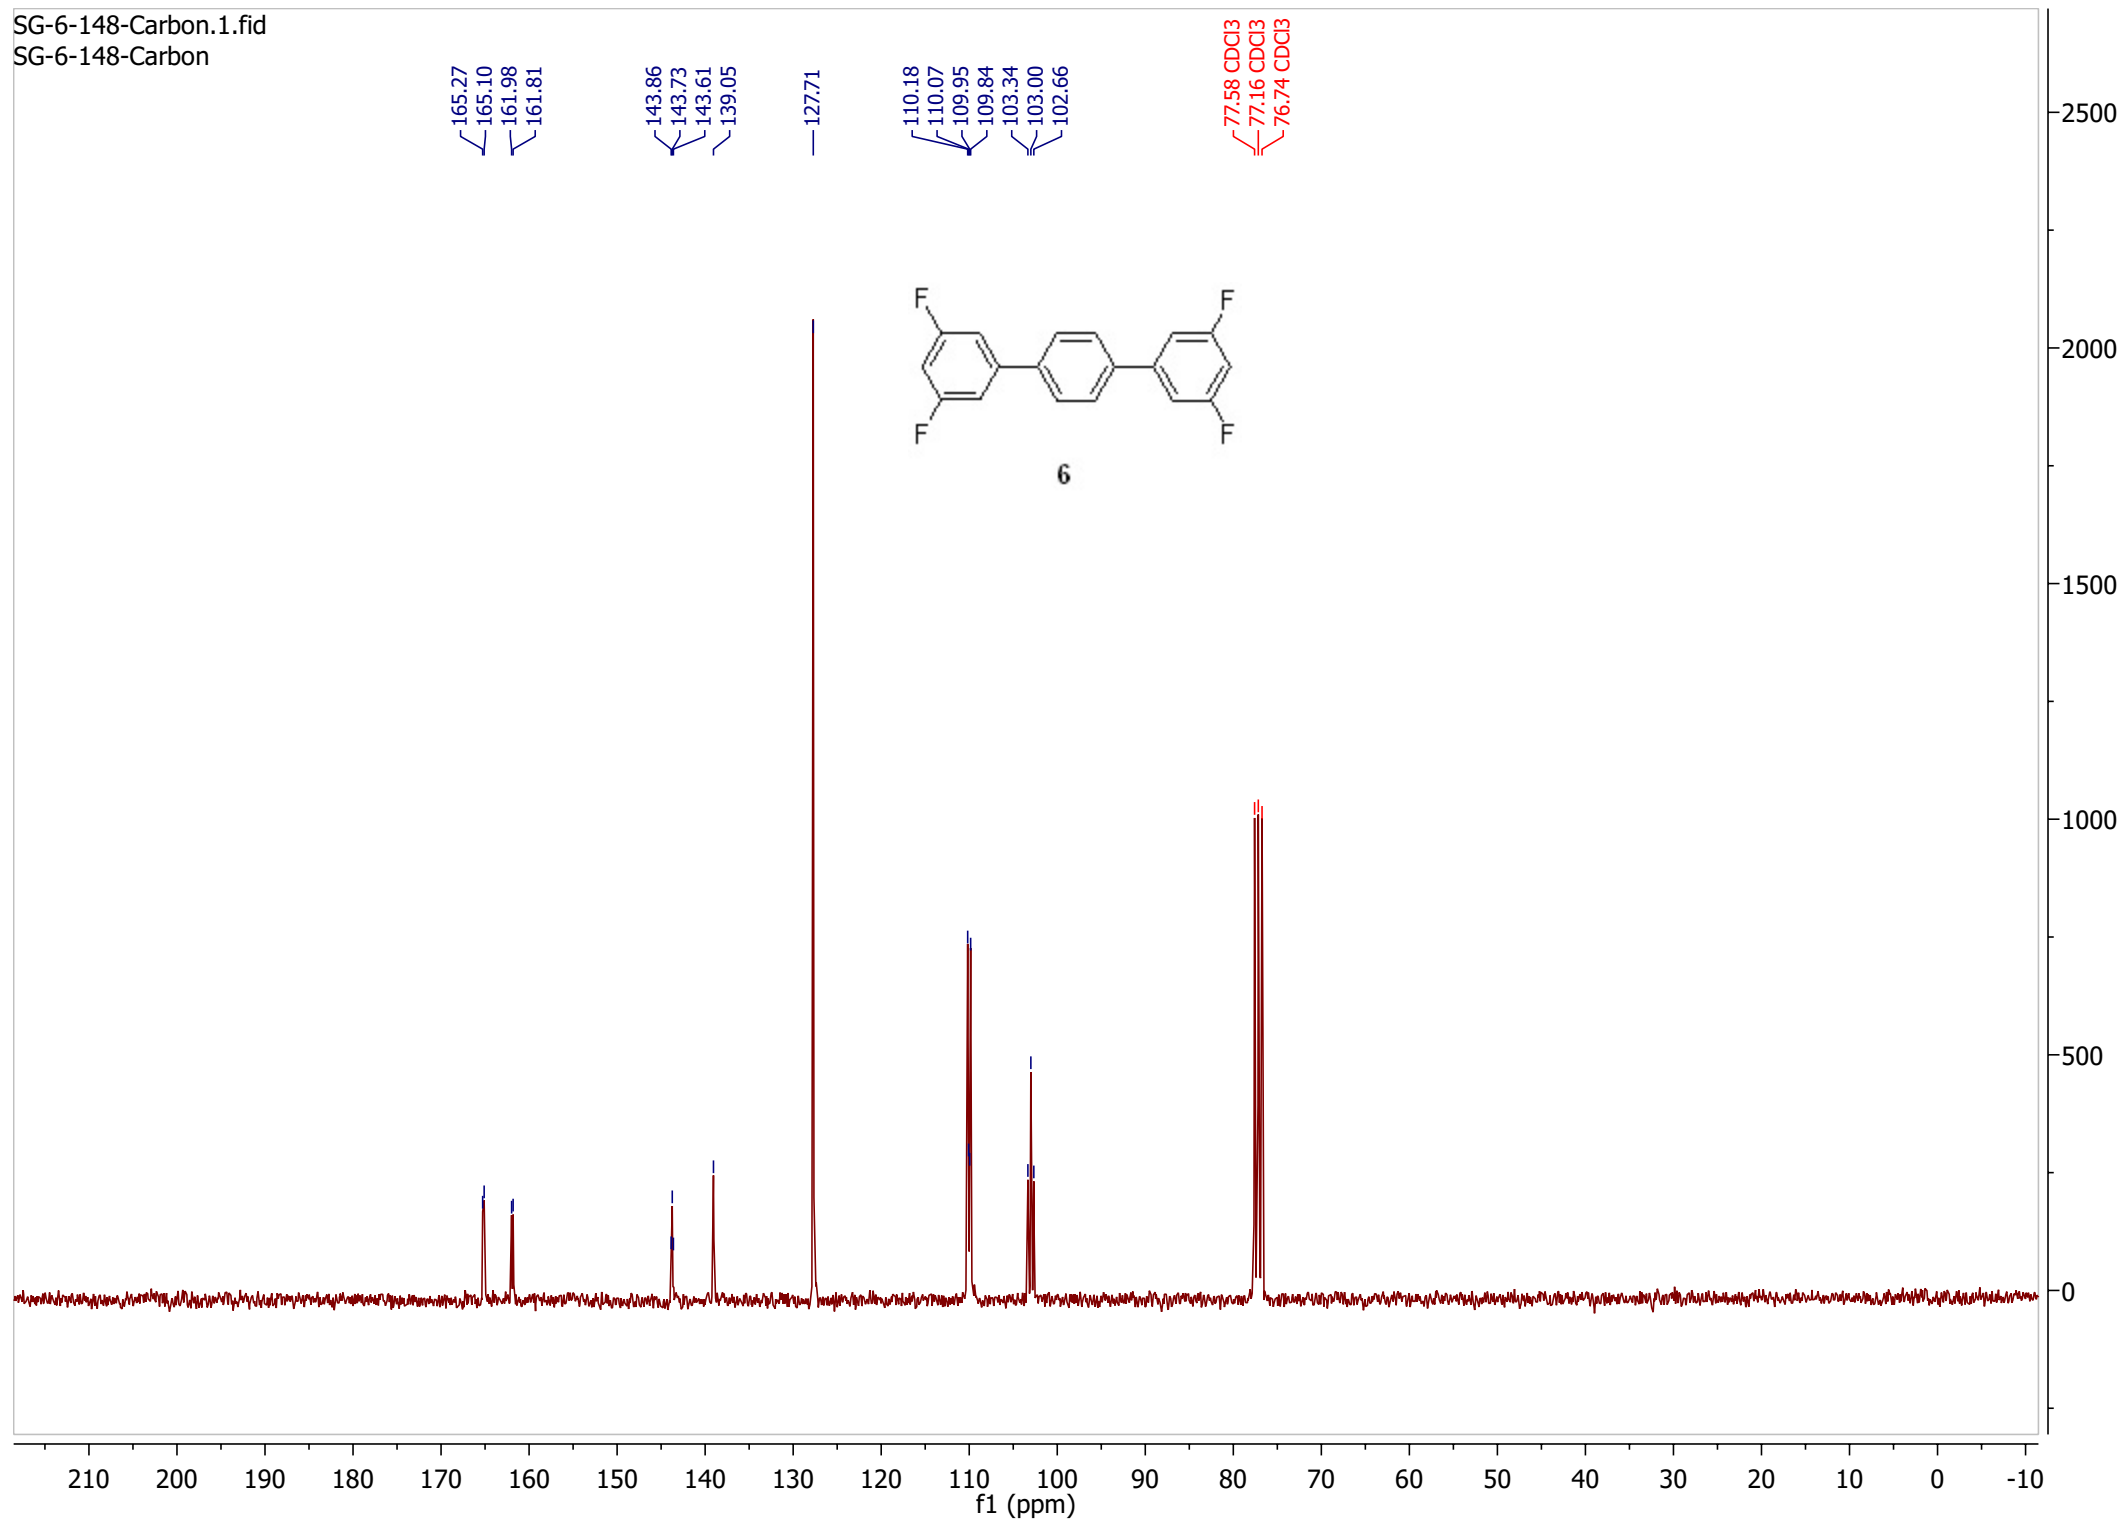

SG-6-148-19F.1.fid  
SG-6-148-19F

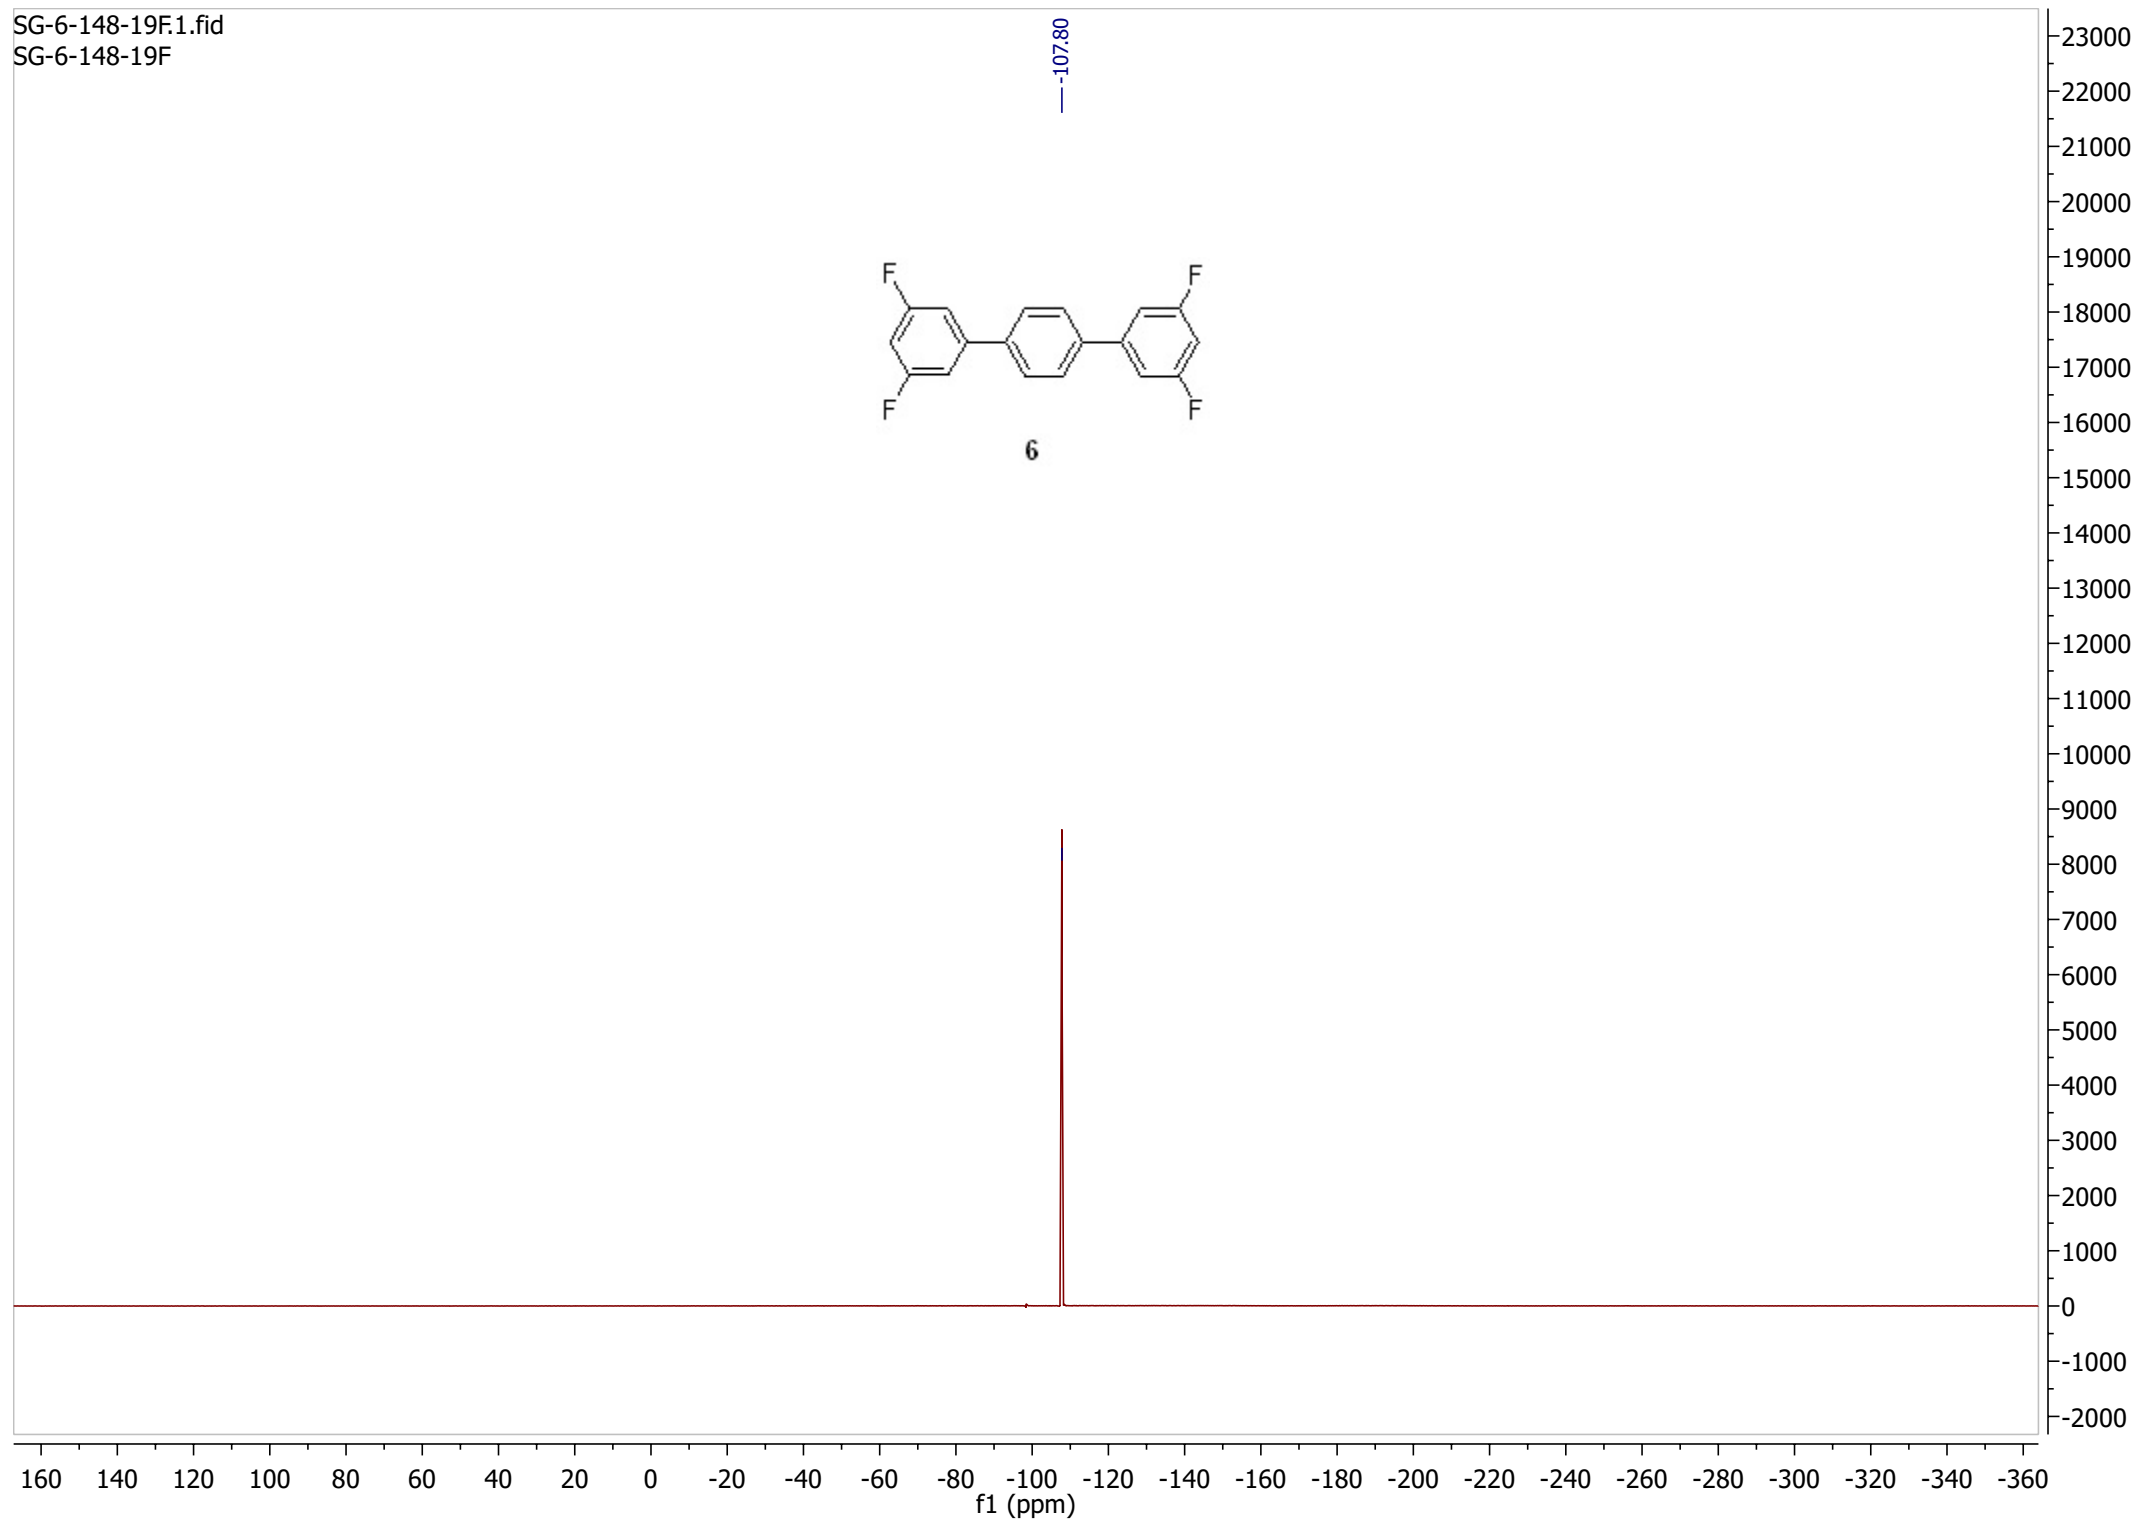

sg-4-147-col-34.1.fid  
sg-4-147-col-34

8.06  
7.91  
7.76  
7.26

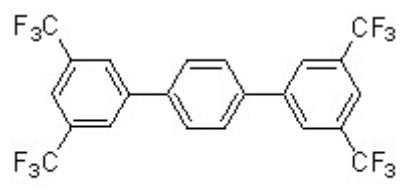

**7**

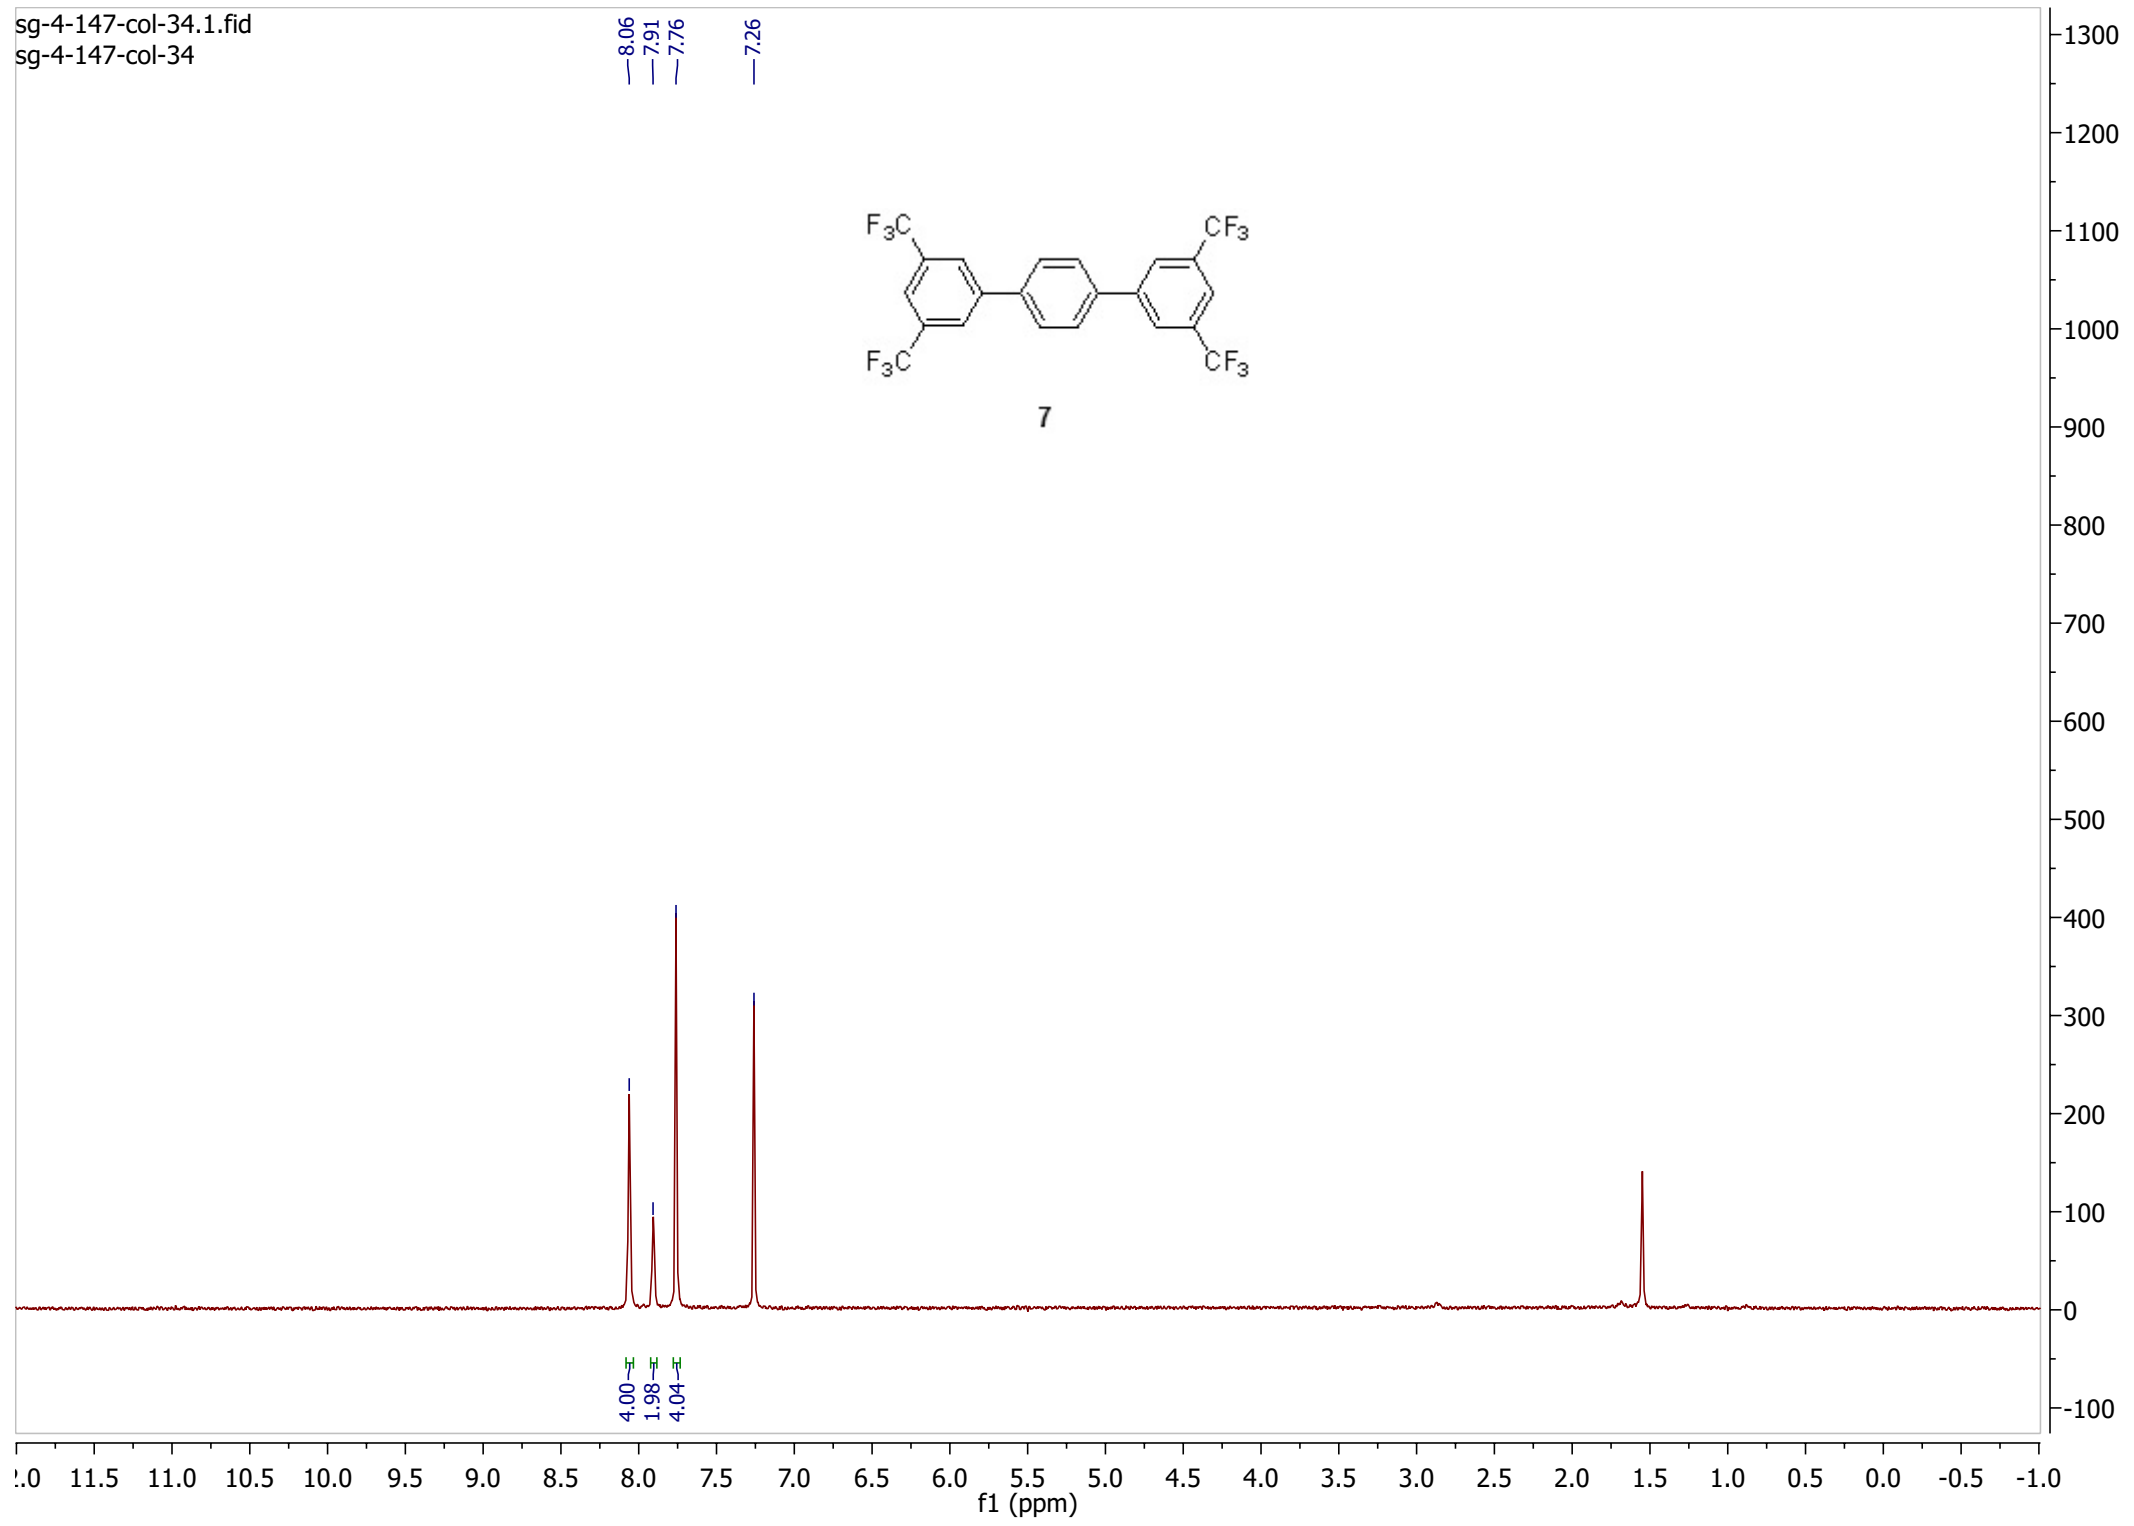

142.44  
138.90  
133.22  
132.77  
132.33  
131.89  
128.30  
127.34  
125.27  
121.65  
121.59  
121.56

77.58 CDCl3  
77.16 CDCl3  
76.74 CDCl3

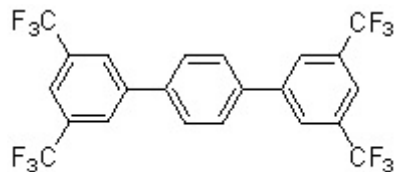

**7**

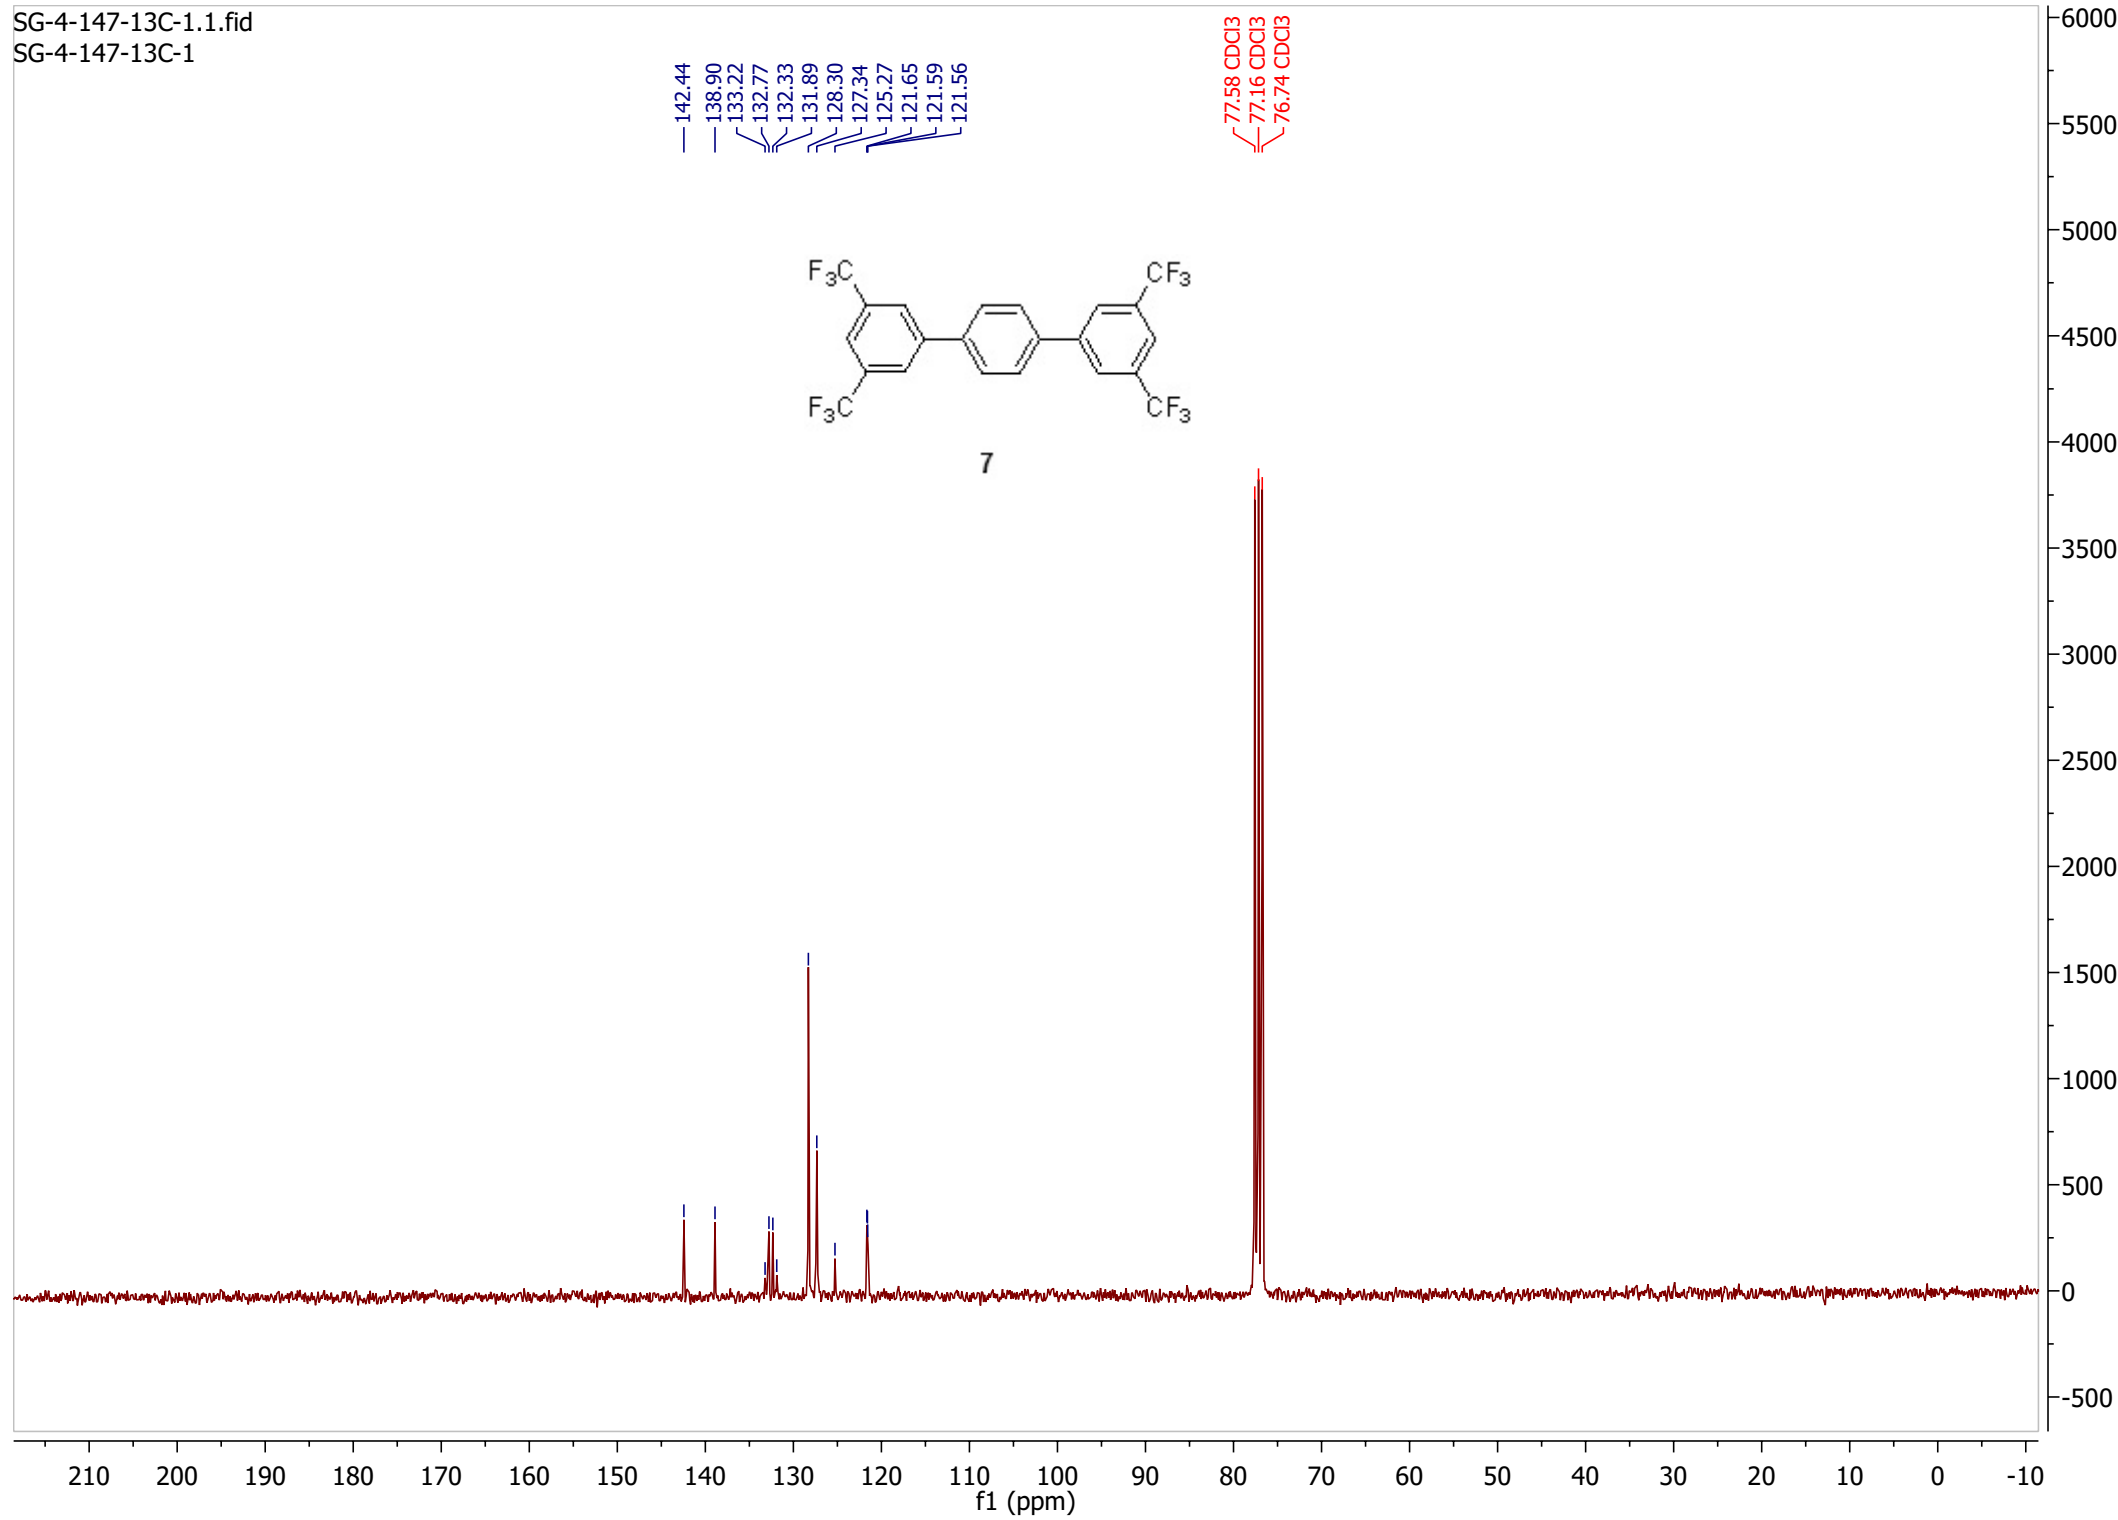

62.80

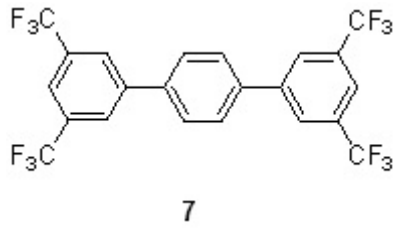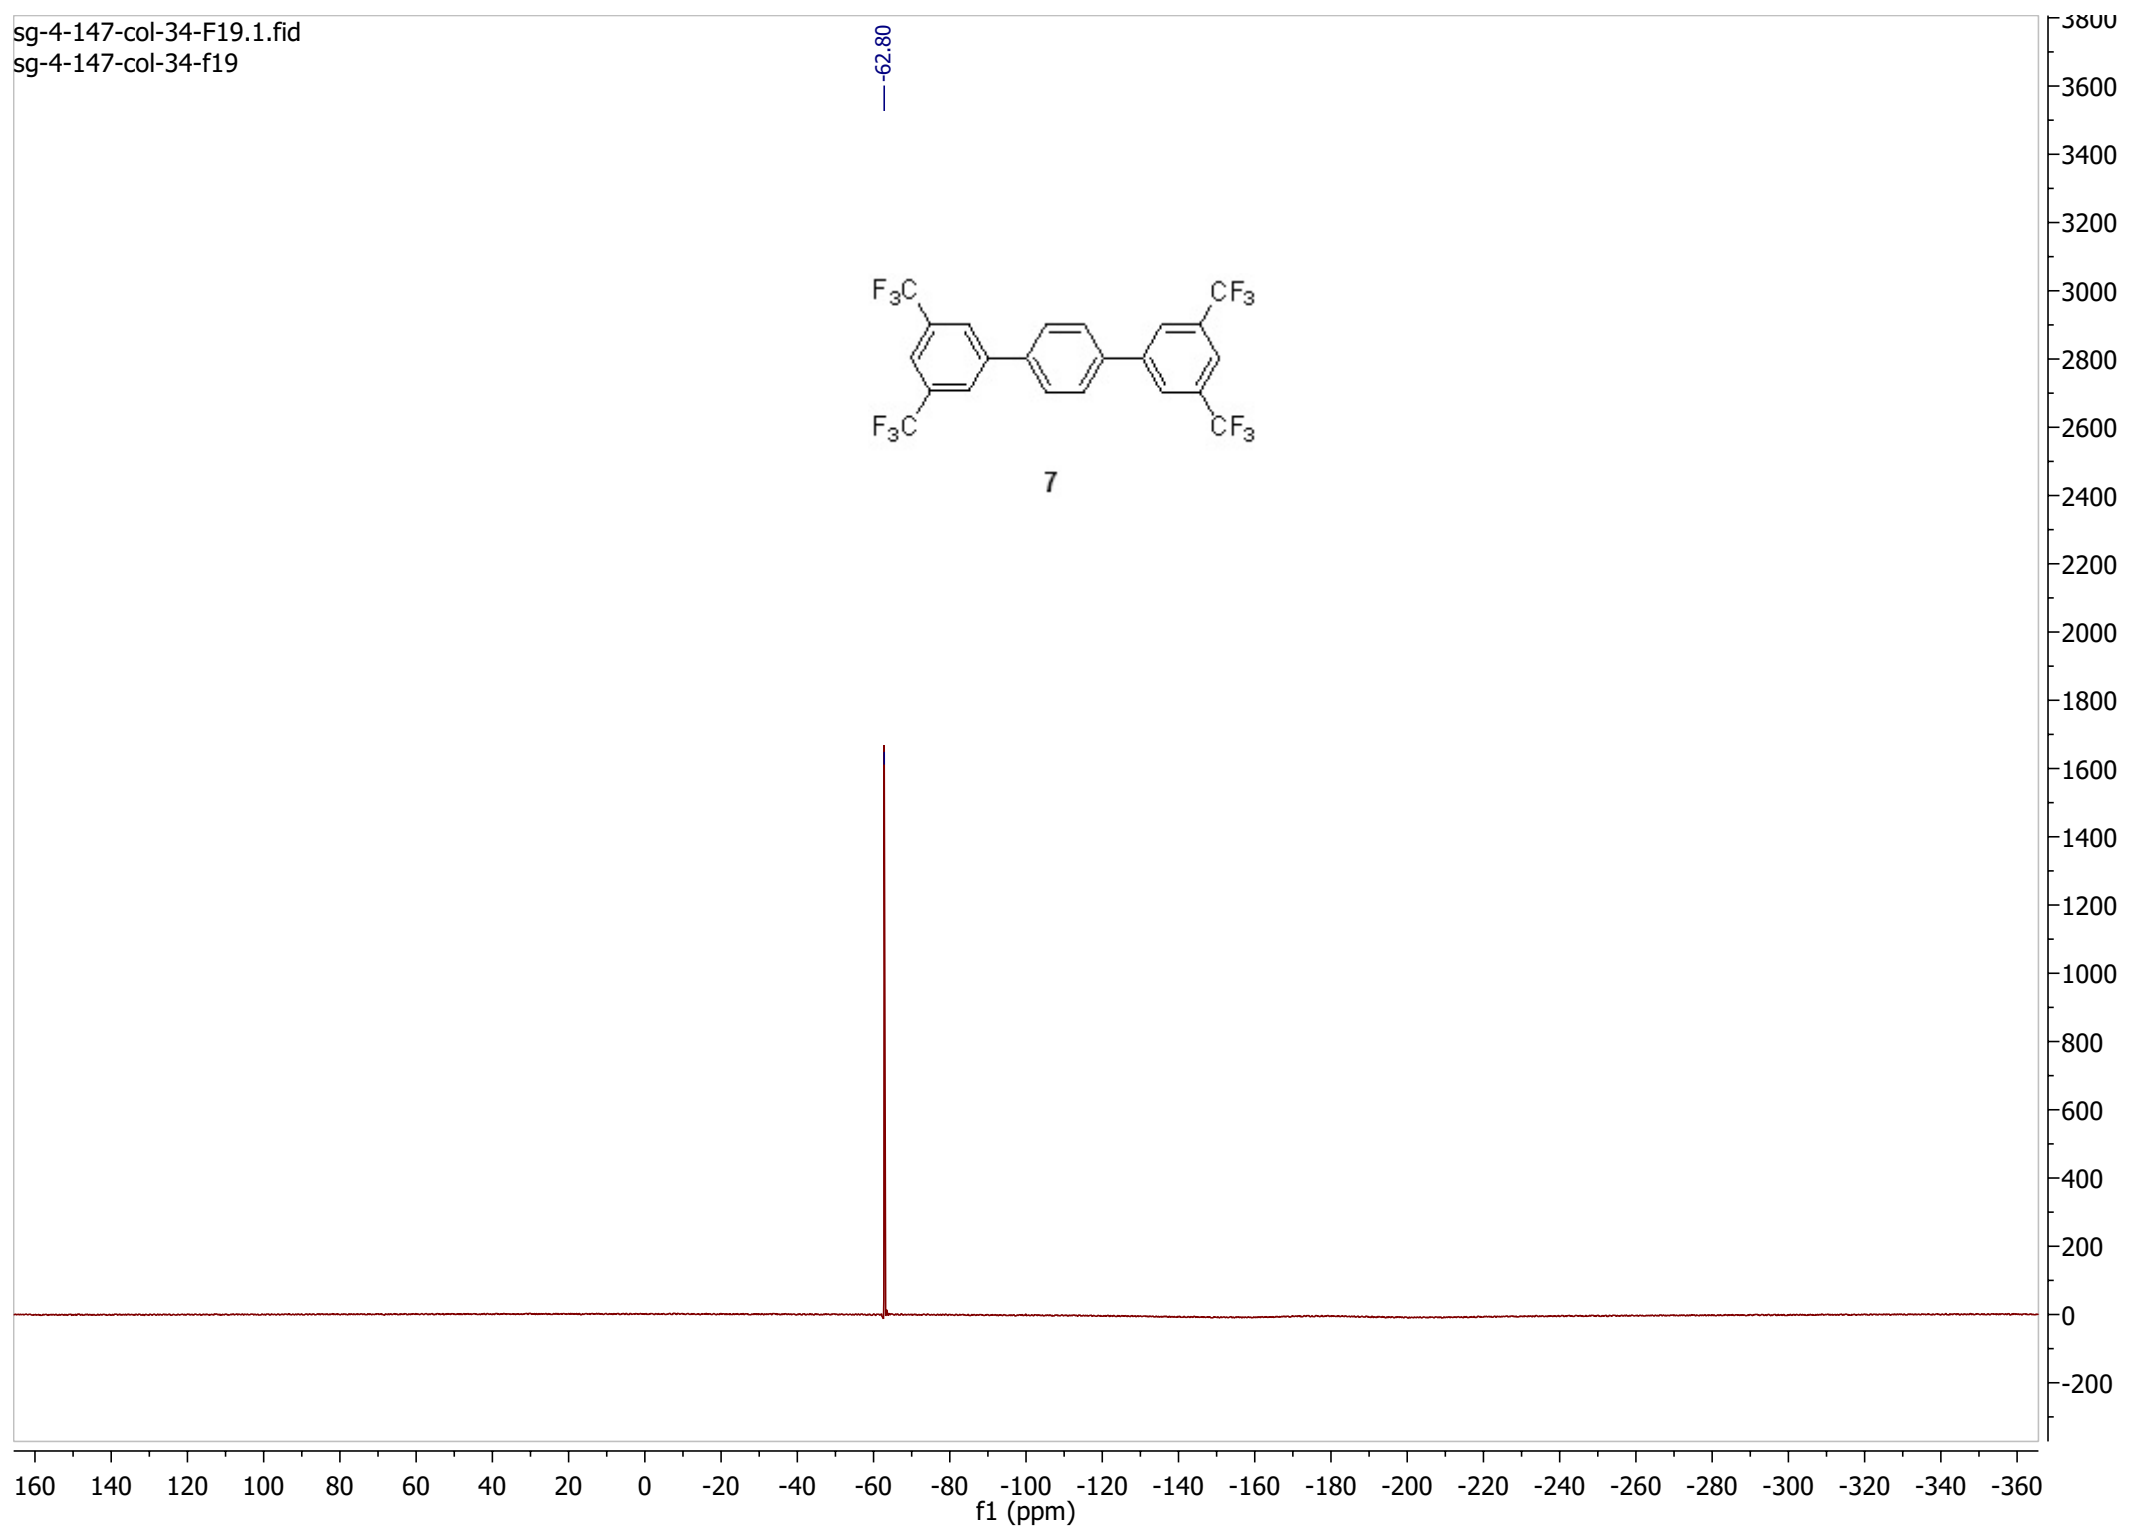

7.16  
6.99  
6.80  
6.79  
6.77  
6.75  
6.74  
6.72  
6.71  
6.69

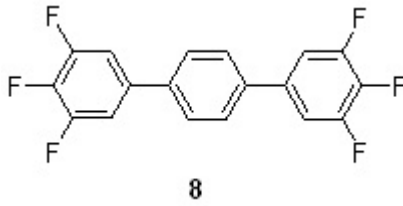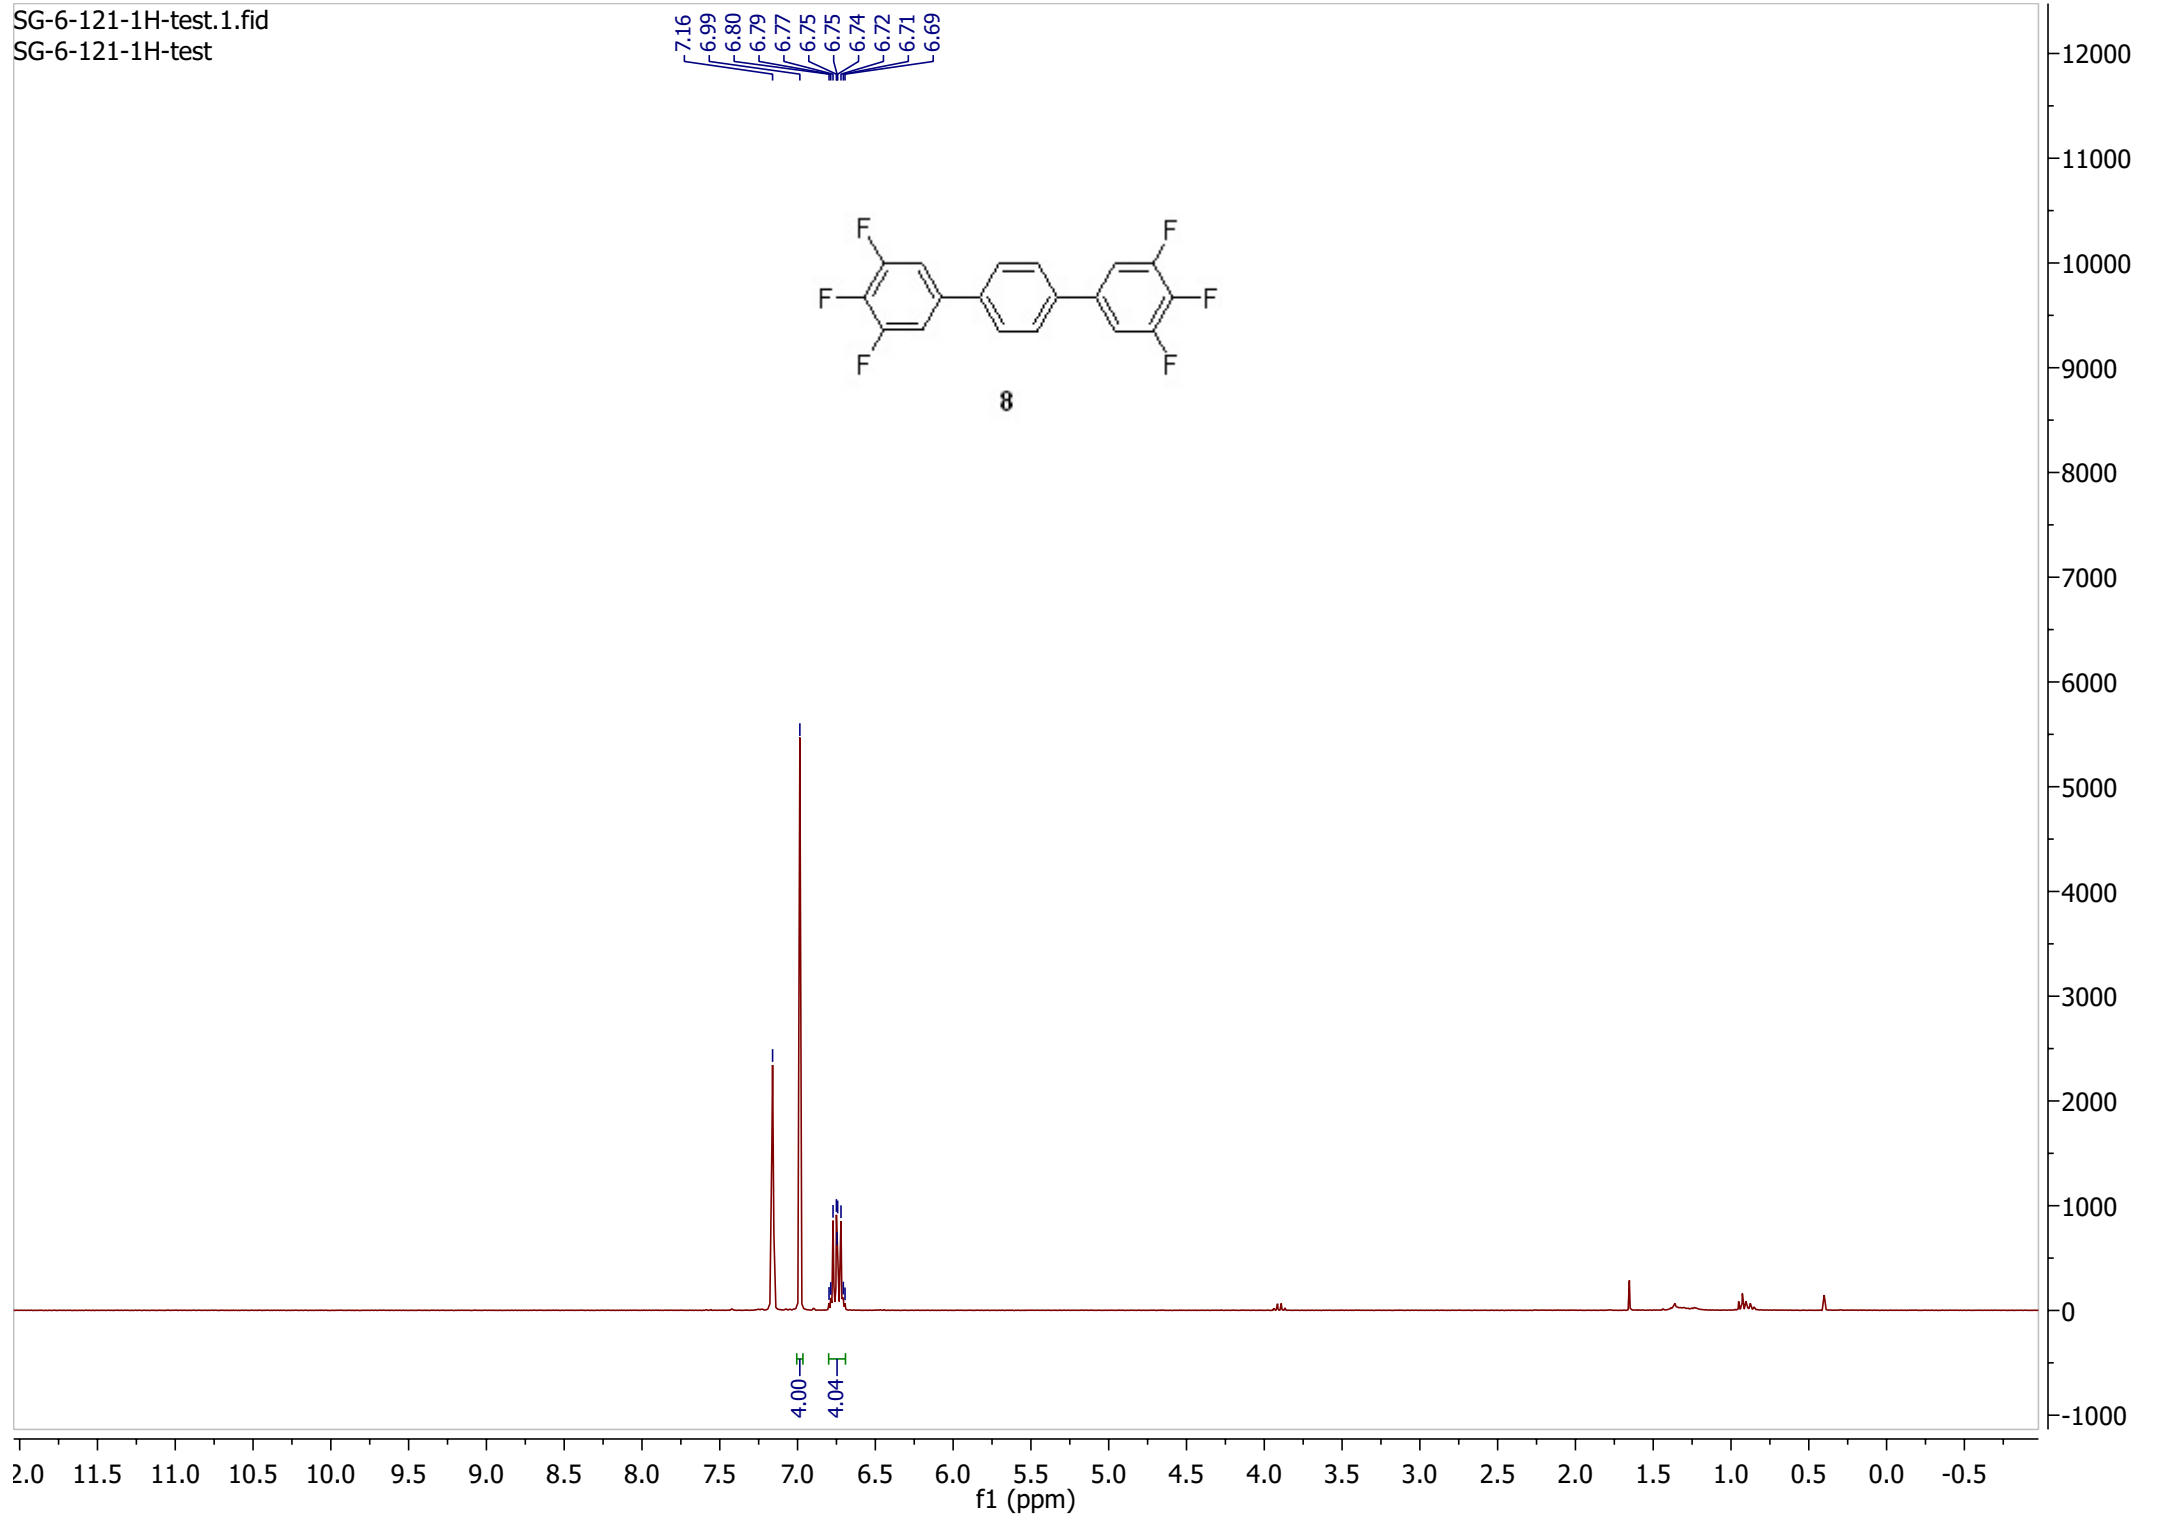



SG-6-121-19F.1.fid  
SG-6-121-19F

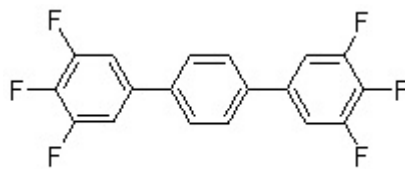

**8**

131.99  
132.06

160.19  
160.26  
160.33

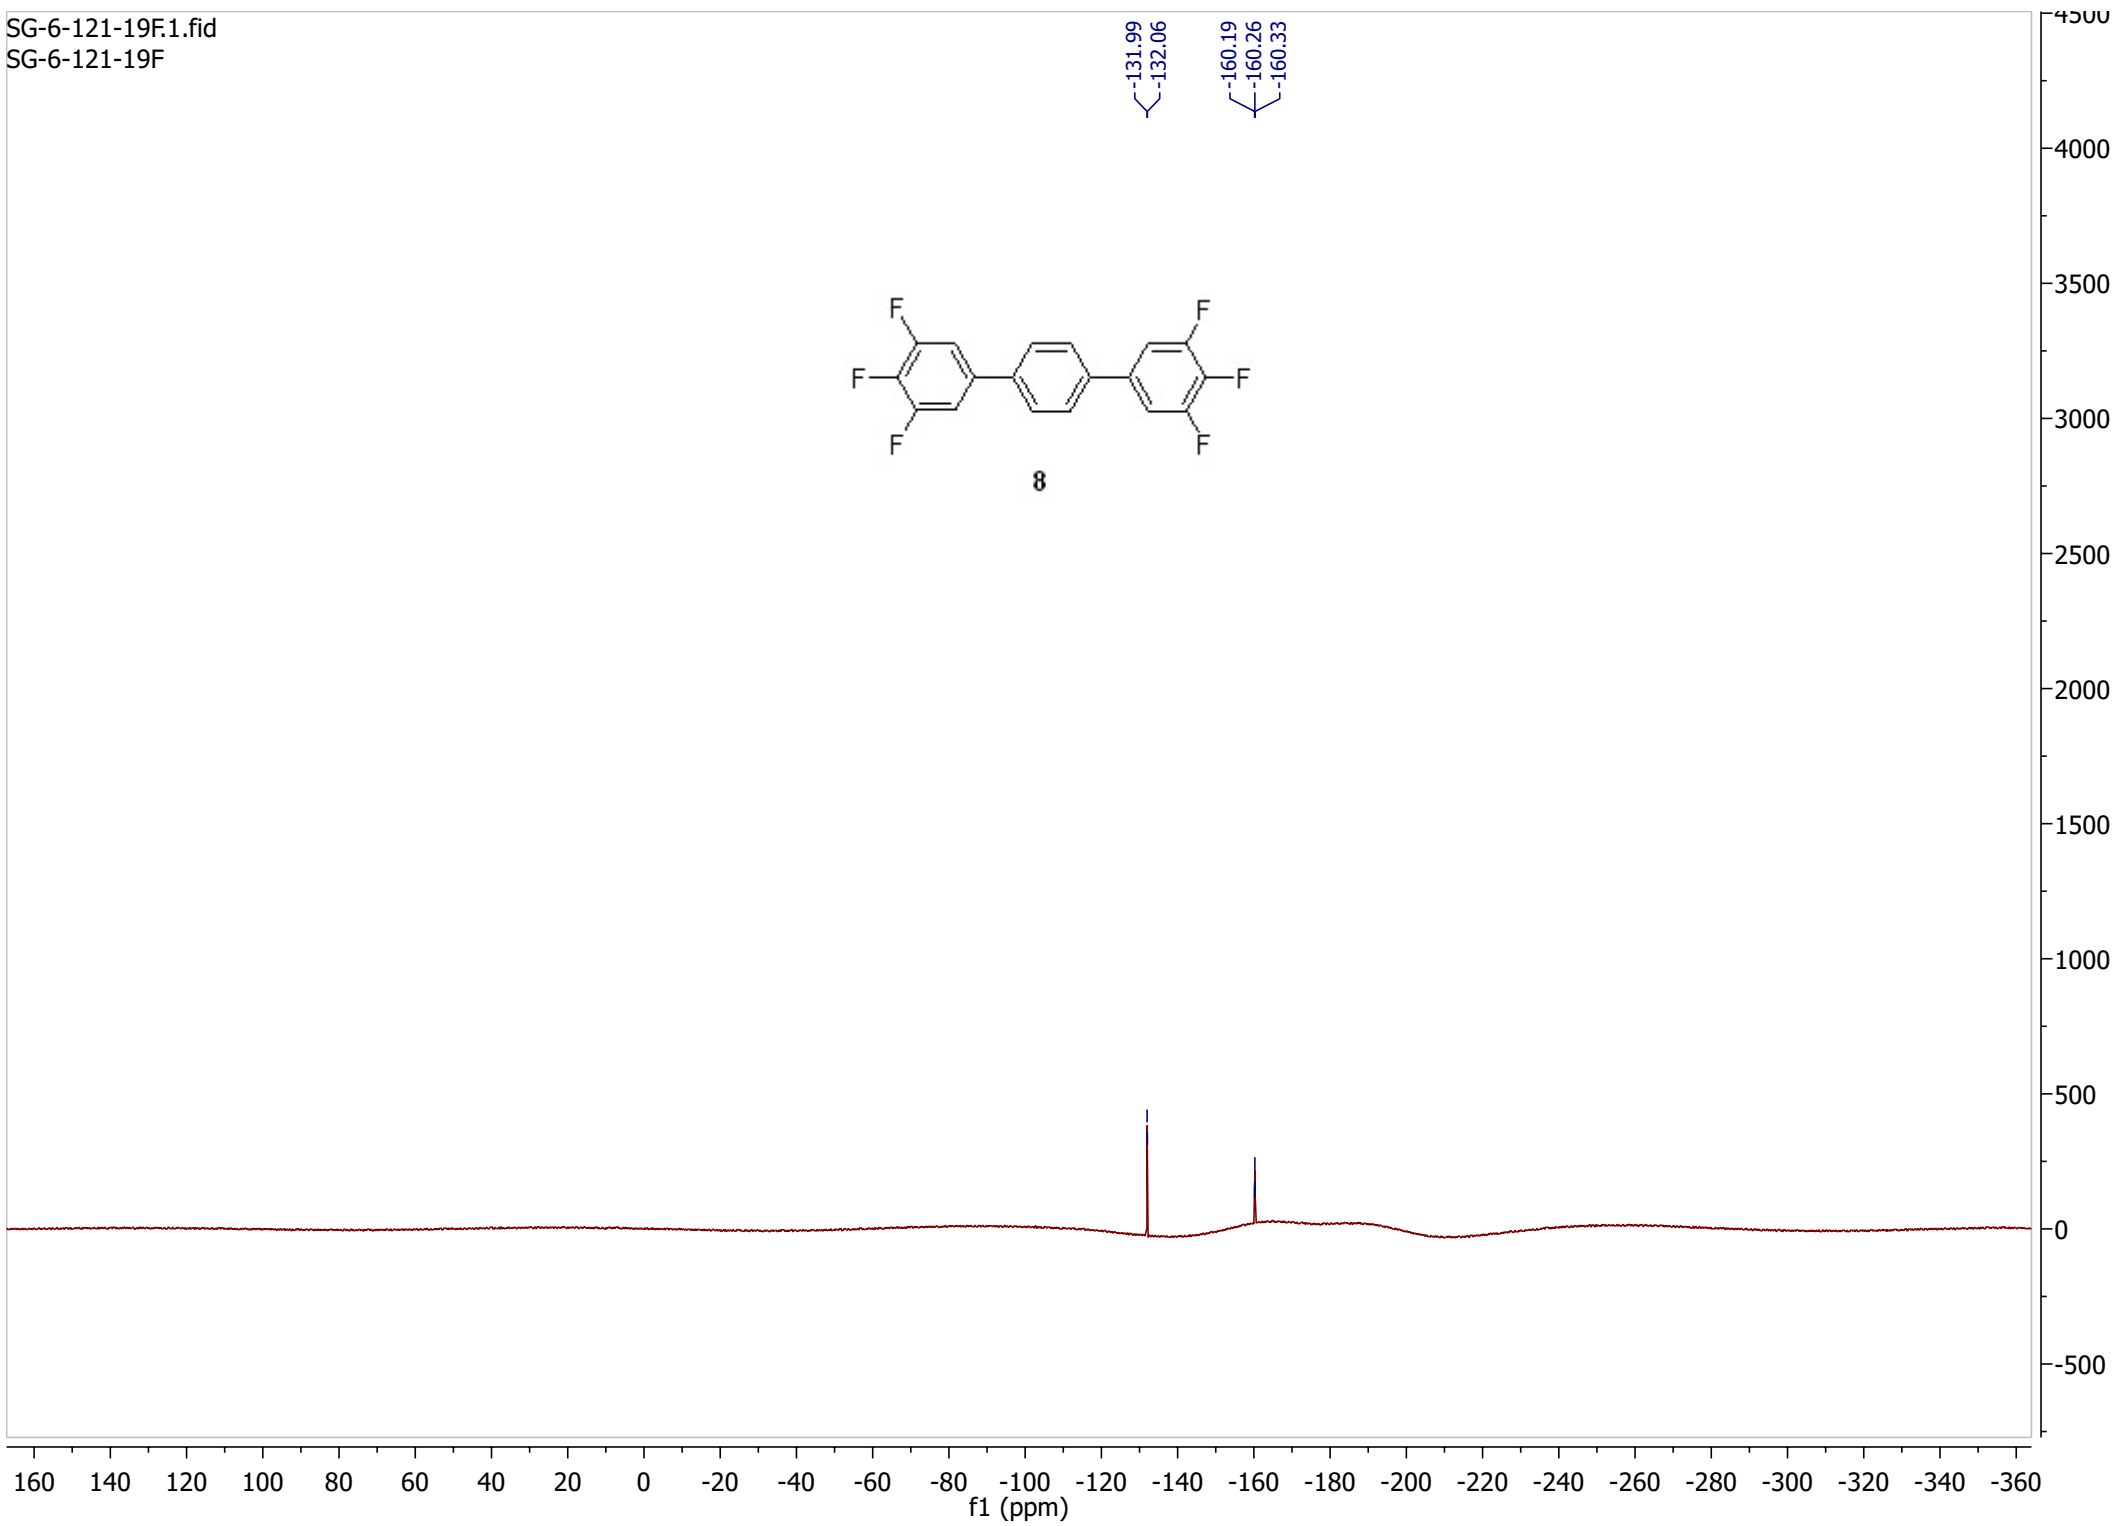

SG-6-78-Proton.1.fid  
SG-6-78-Proton

7.74  
7.72  
7.71  
7.70  
7.69  
7.67  
7.67  
7.61  
7.61  
7.59  
7.58  
7.58  
7.52  
7.51  
7.49  
7.47  
7.46  
7.45  
7.43  
7.40  
7.26

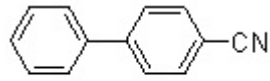

9

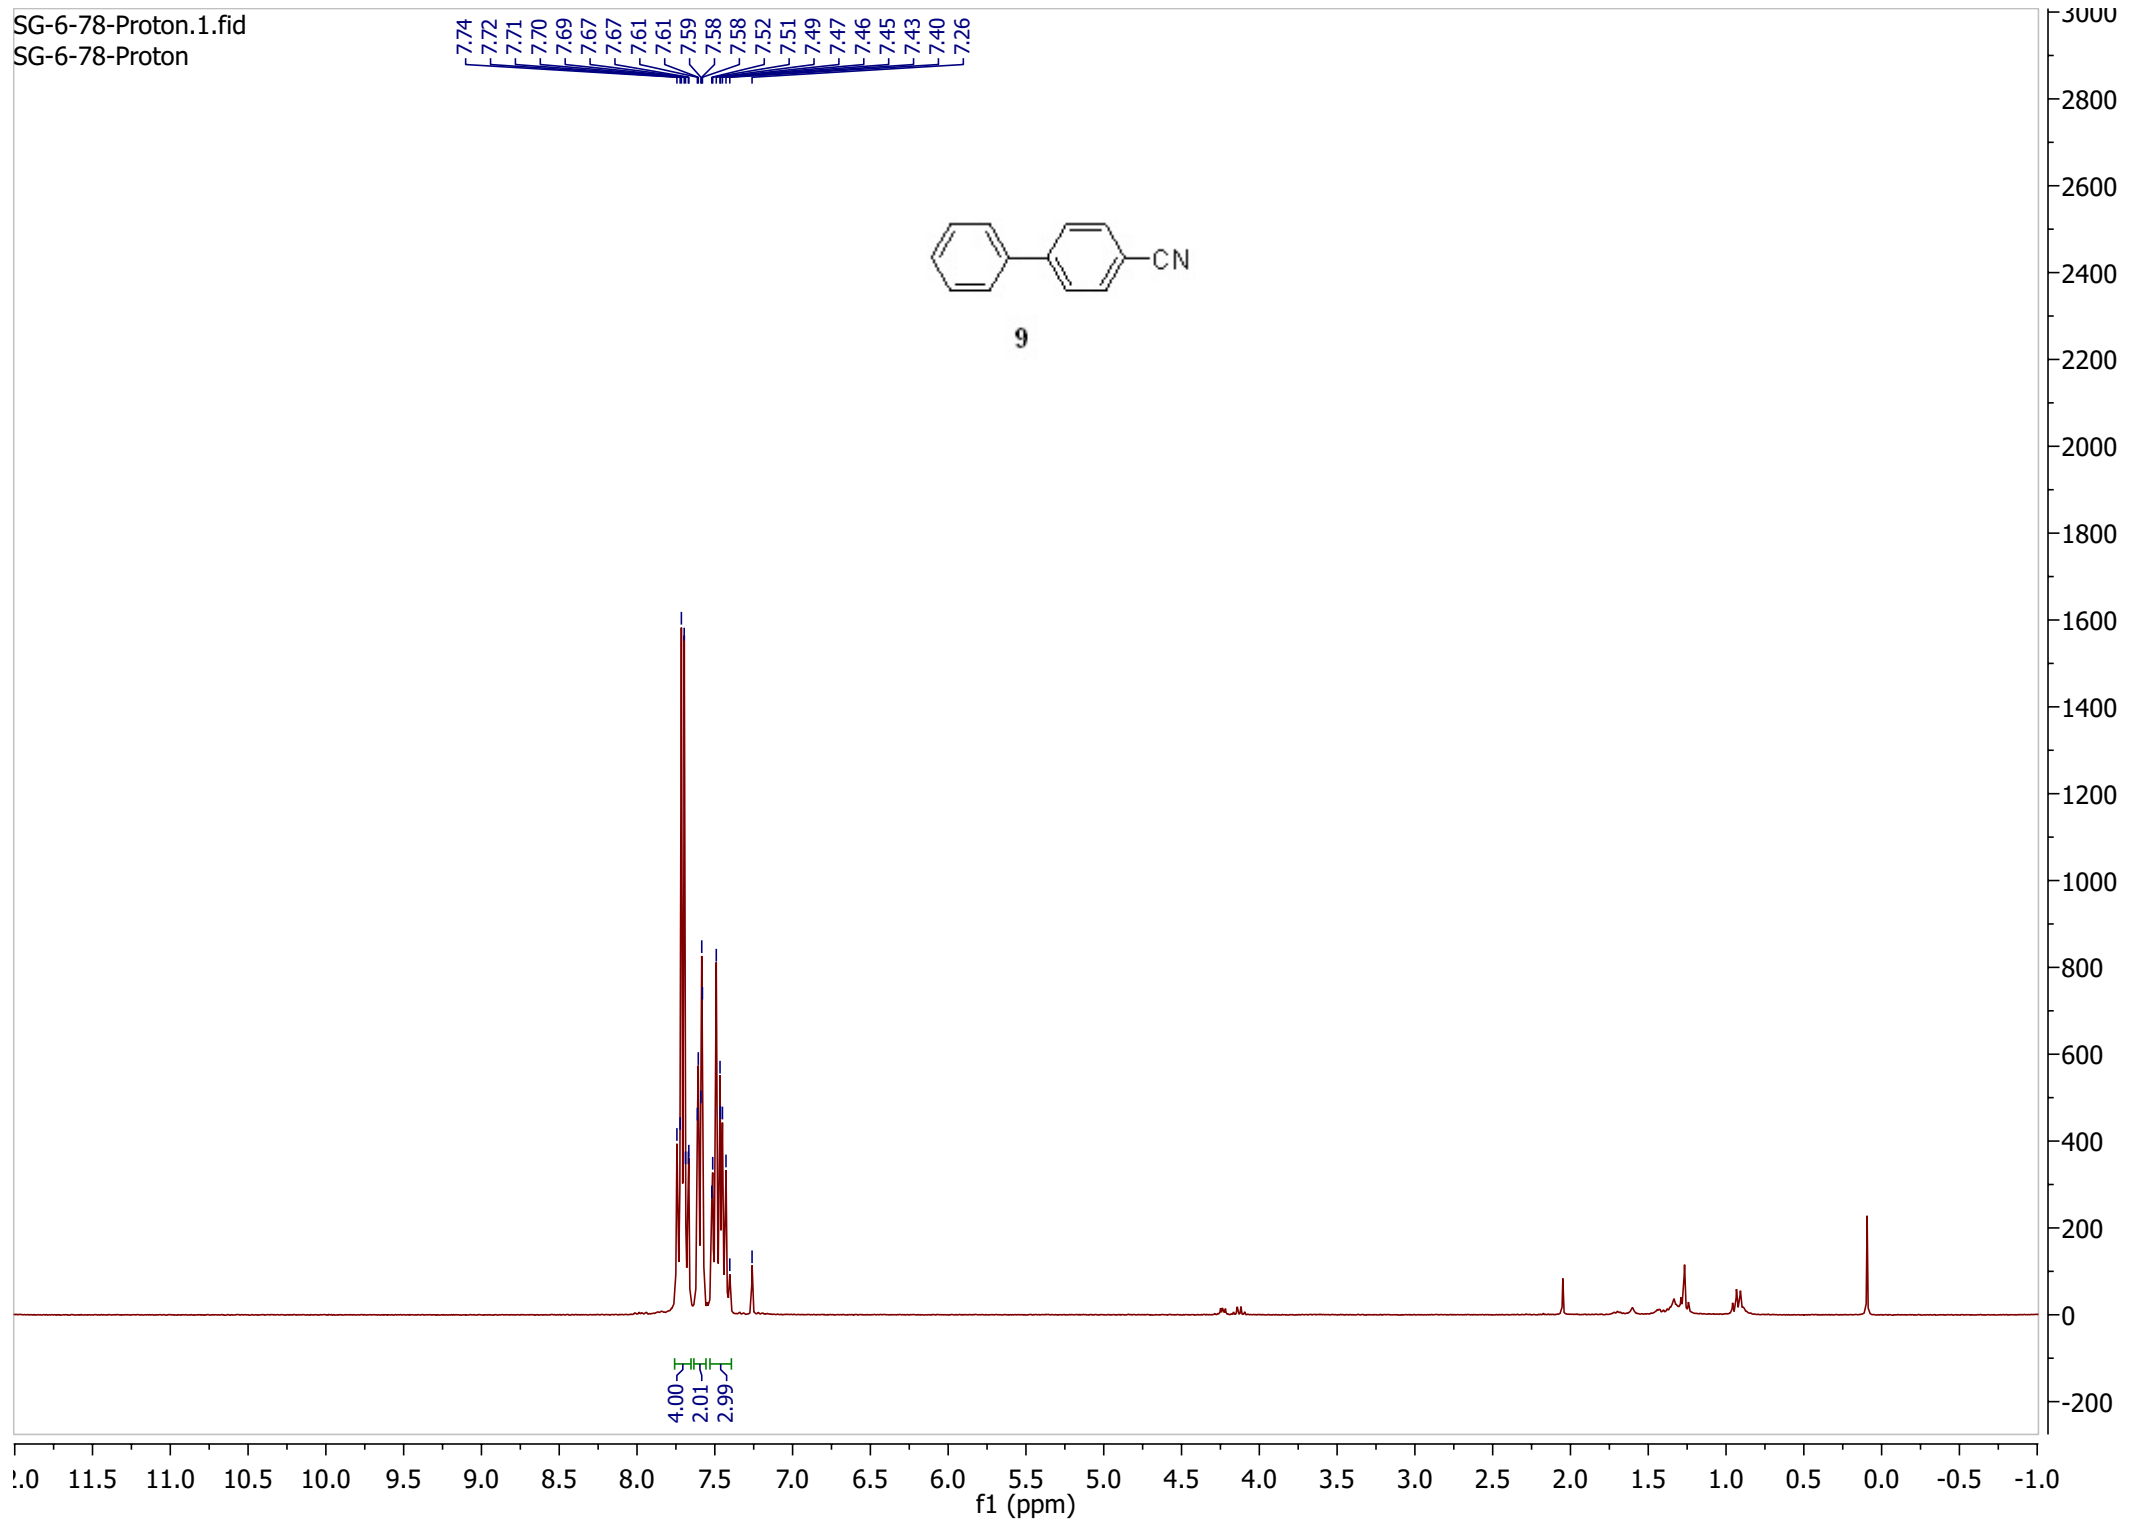

SG-6-78-Carbon.1.fid  
SG-6-78-Carbon

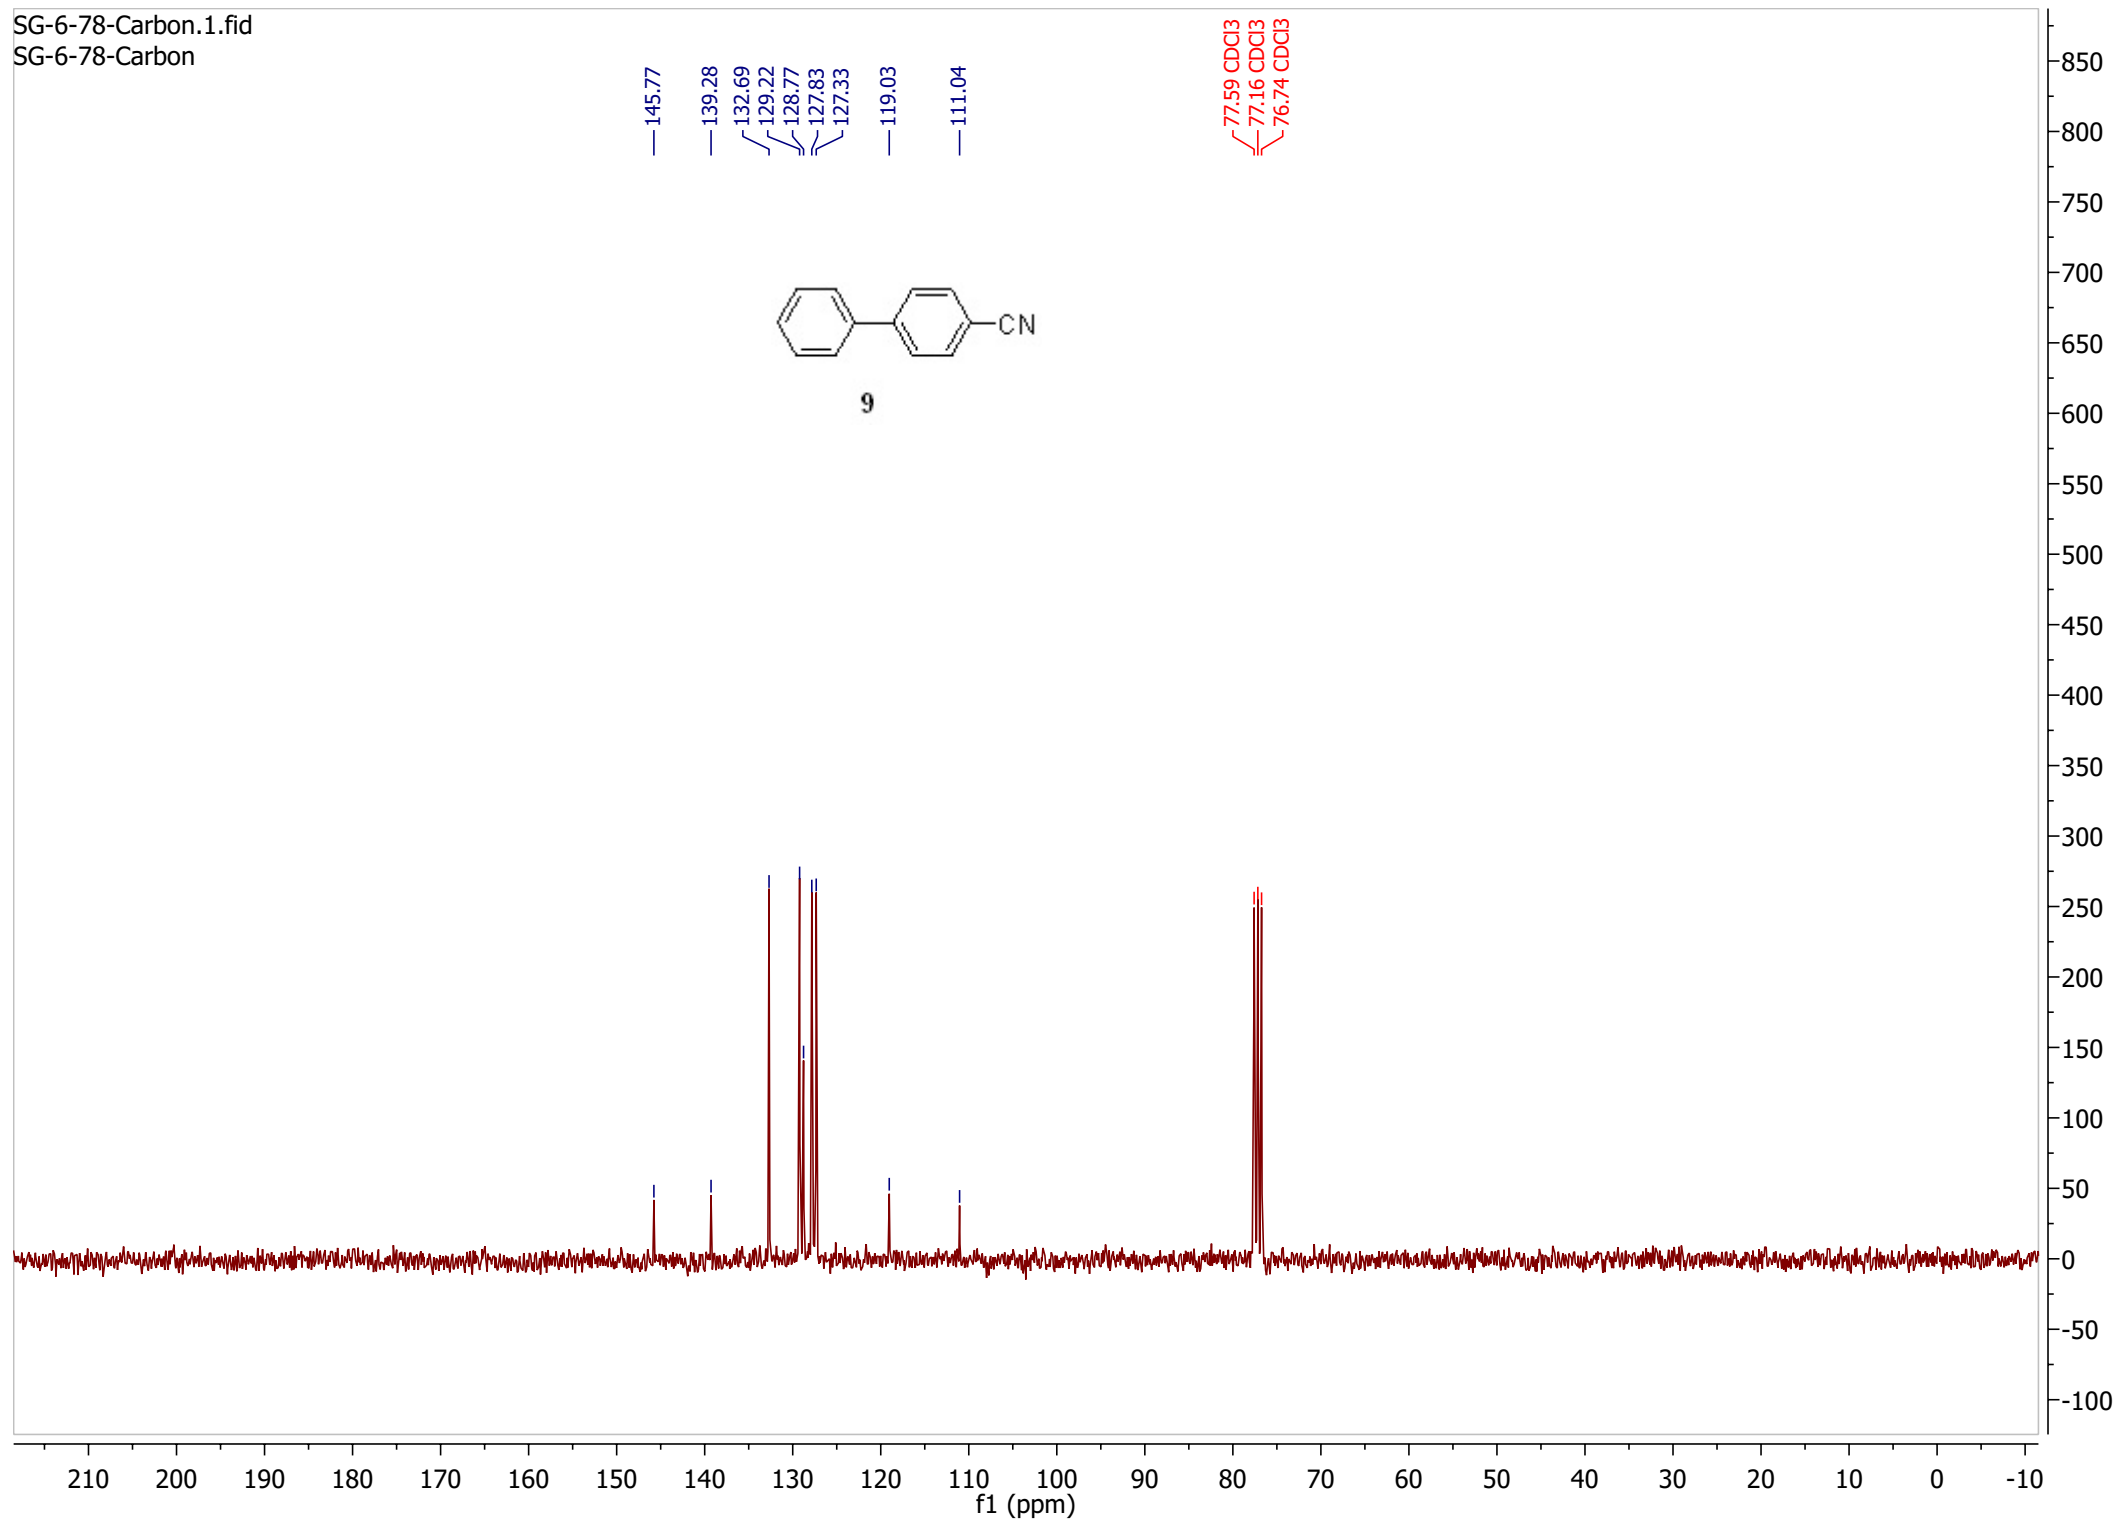

7.75  
7.74  
7.74  
7.73  
7.72  
7.71  
7.71  
7.67  
7.66  
7.65  
7.65  
7.63  
7.63  
7.62  
7.62  
7.59  
7.58  
7.58  
7.57  
7.56  
7.56  
7.55  
7.54  
7.54  
7.53  
7.26  
7.21  
7.20  
7.19  
7.18  
7.18  
7.17  
7.17  
7.16  
7.15  
7.14  
7.13

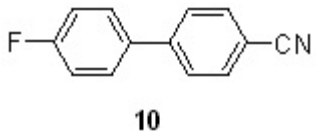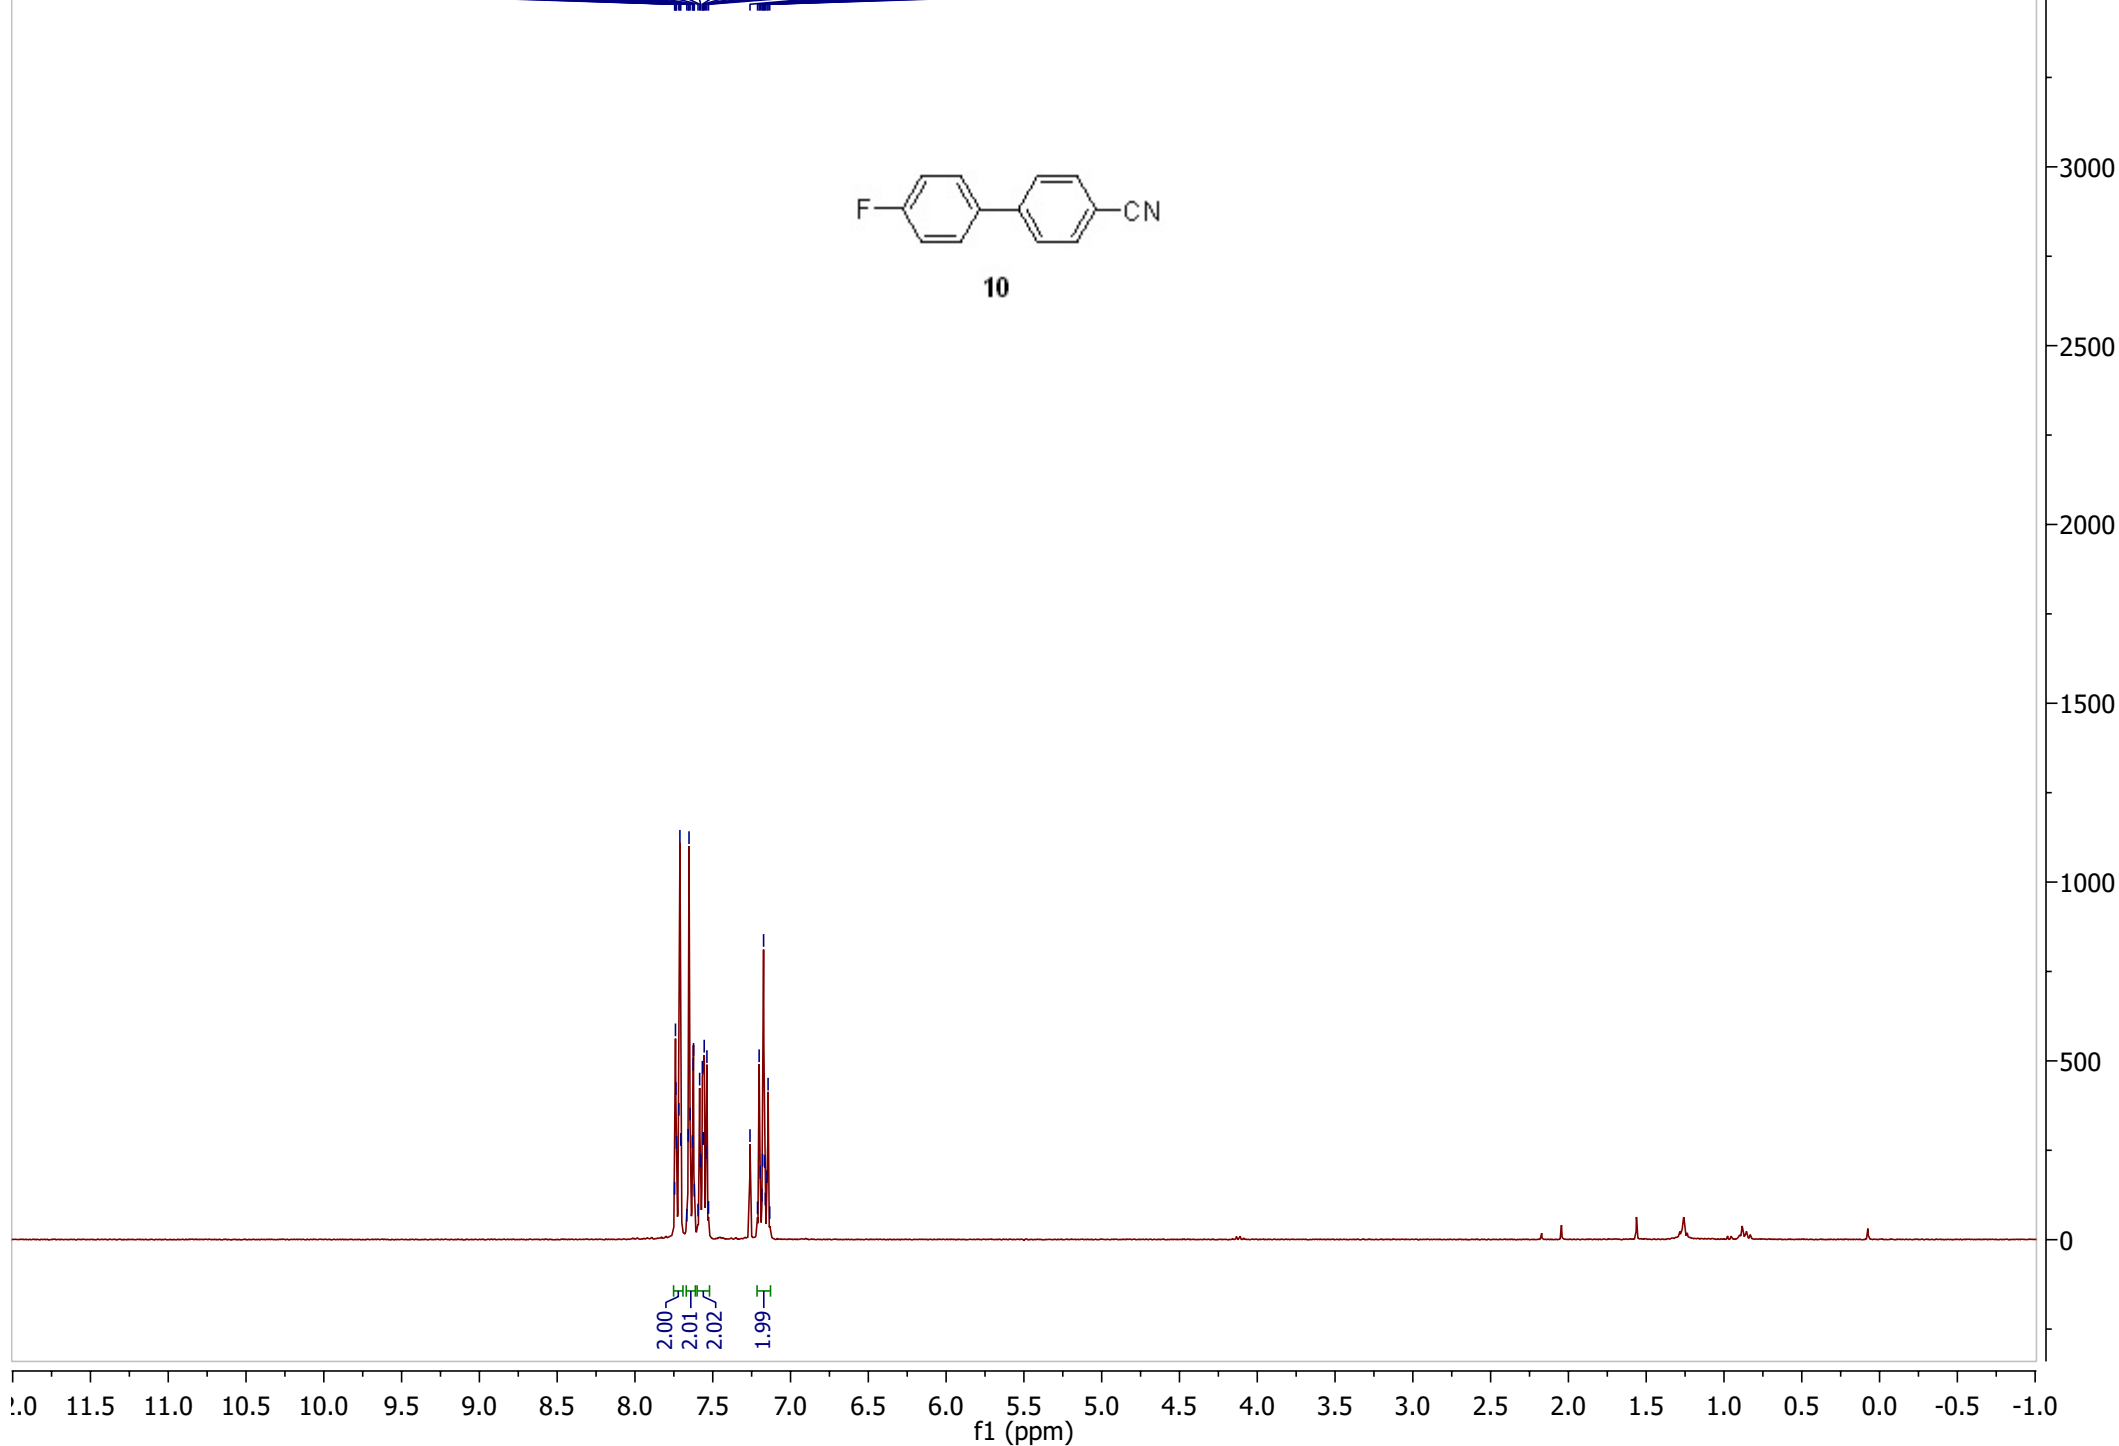

SG-6-73-13C.1.fid  
SG-6-73-13C

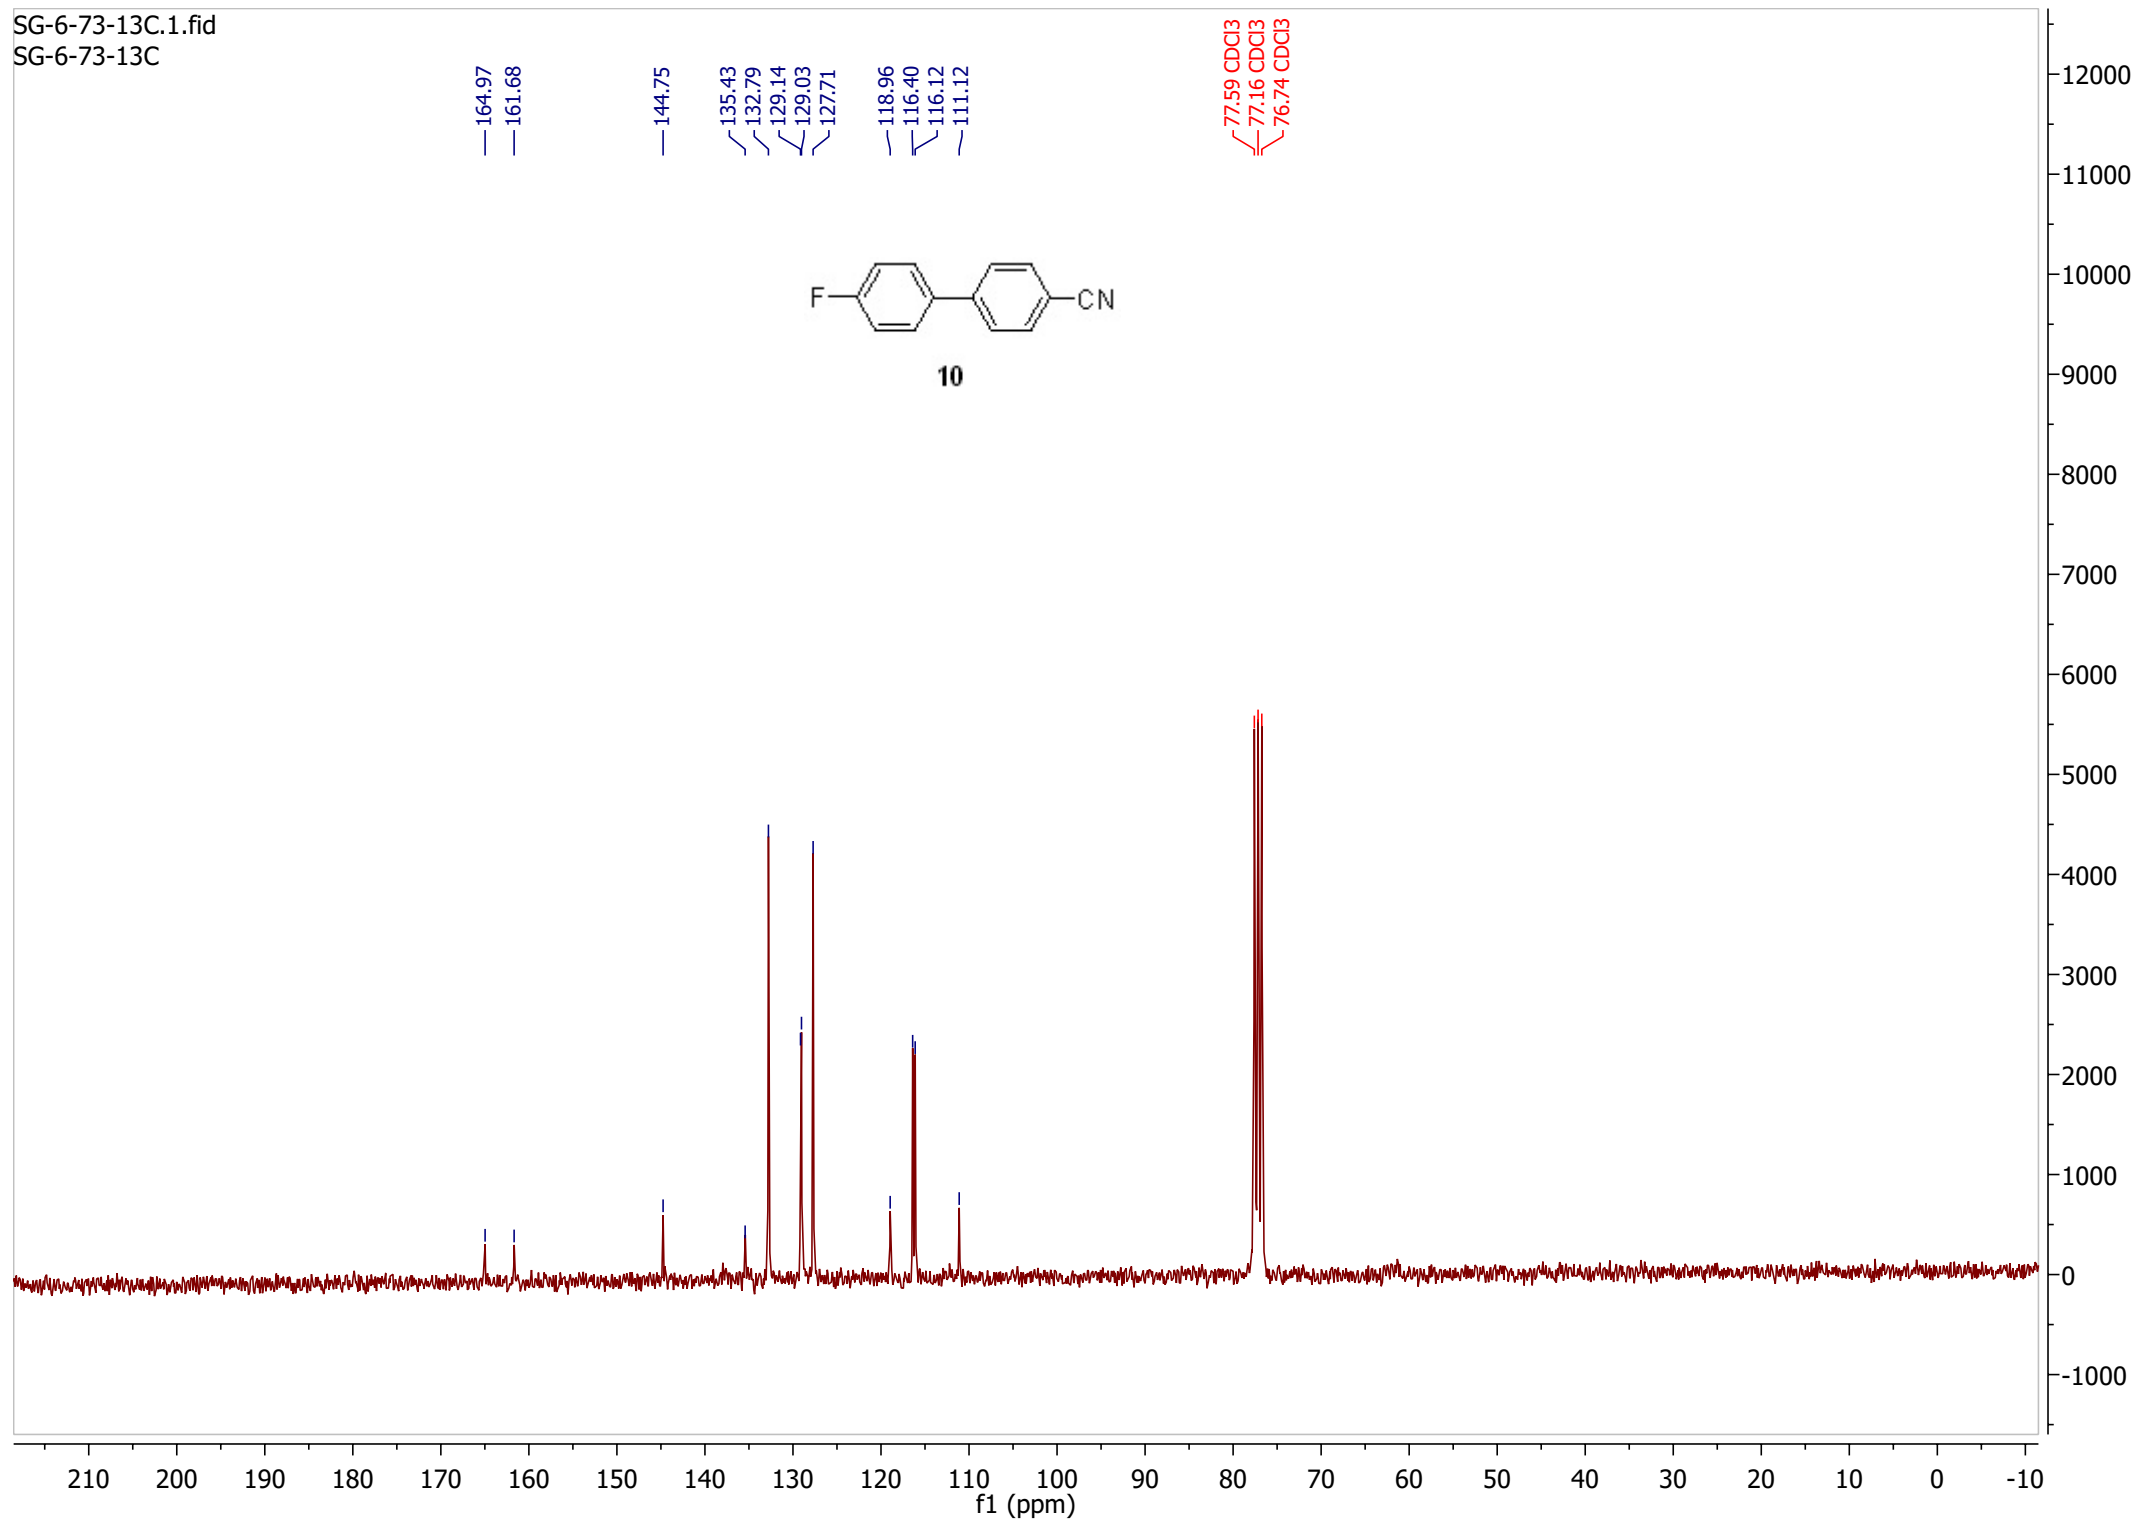

SG-6-73-1-19F1.fid  
SG-6-73-1-19F

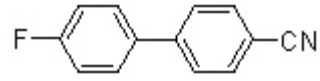

**10**

-111.59

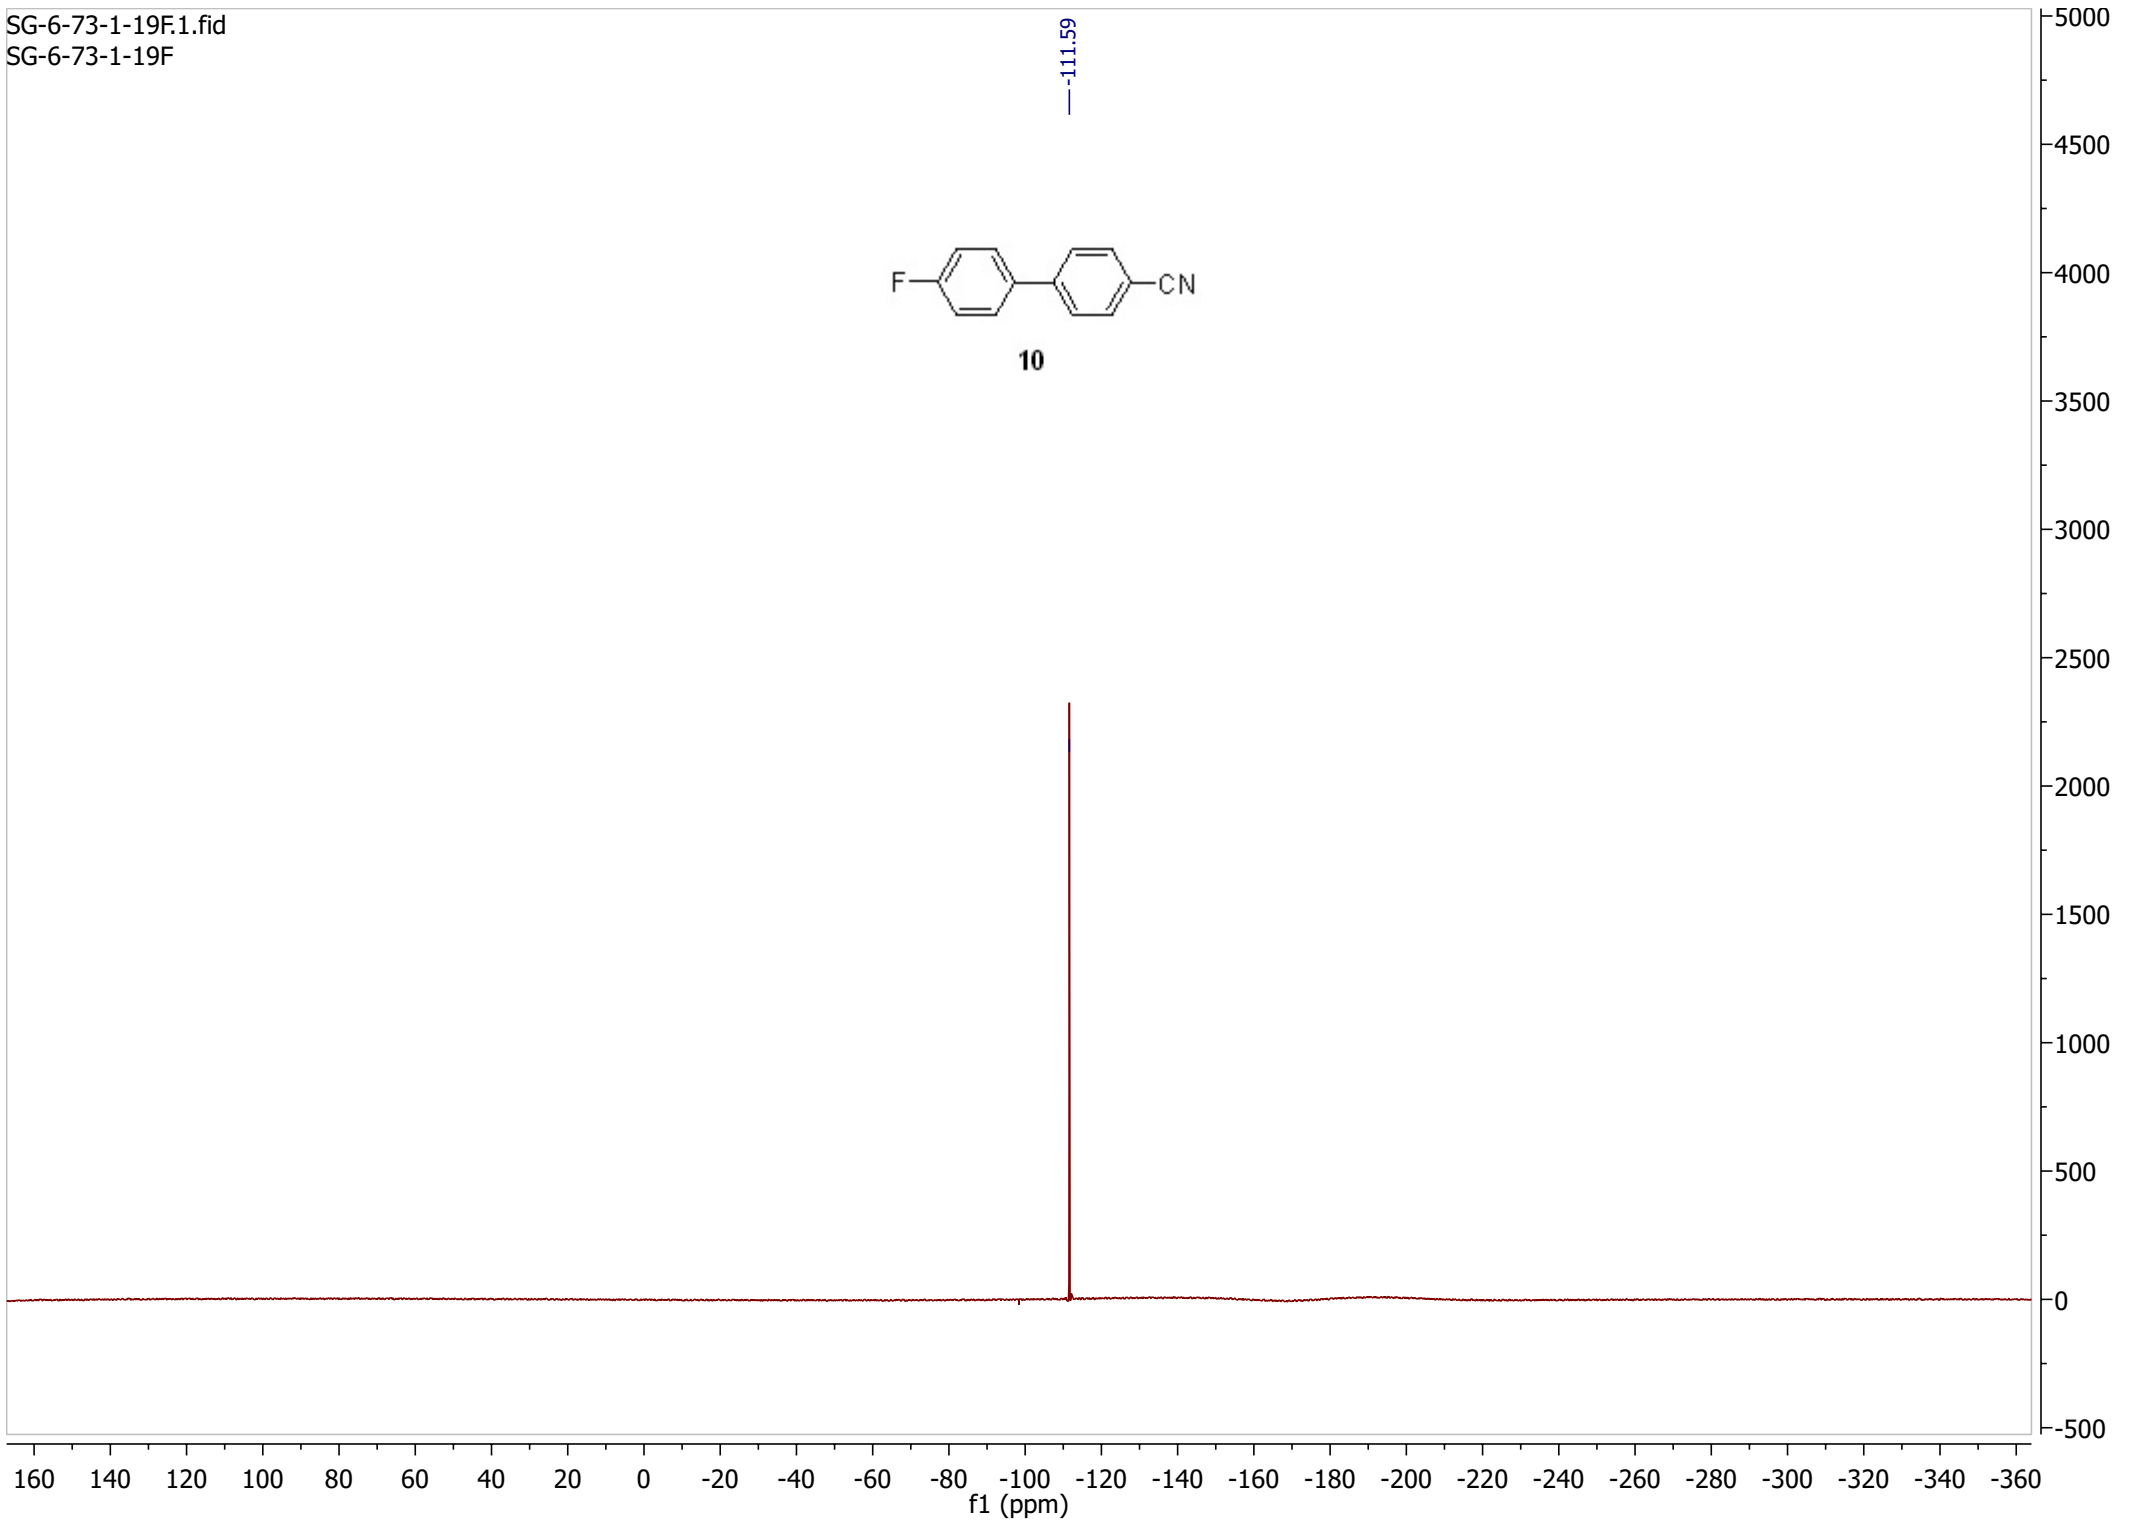

7.773  
7.772  
7.772  
7.771  
7.770  
7.699  
7.688  
7.688  
7.667  
7.666  
7.665  
7.665  
7.664  
7.552  
7.551  
7.550  
7.499  
7.498  
7.498  
7.432  
7.332  
7.331  
7.330  
7.329  
7.228  
7.228  
7.227  
7.226

2.42

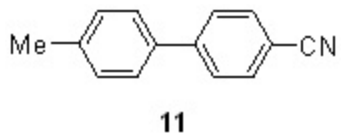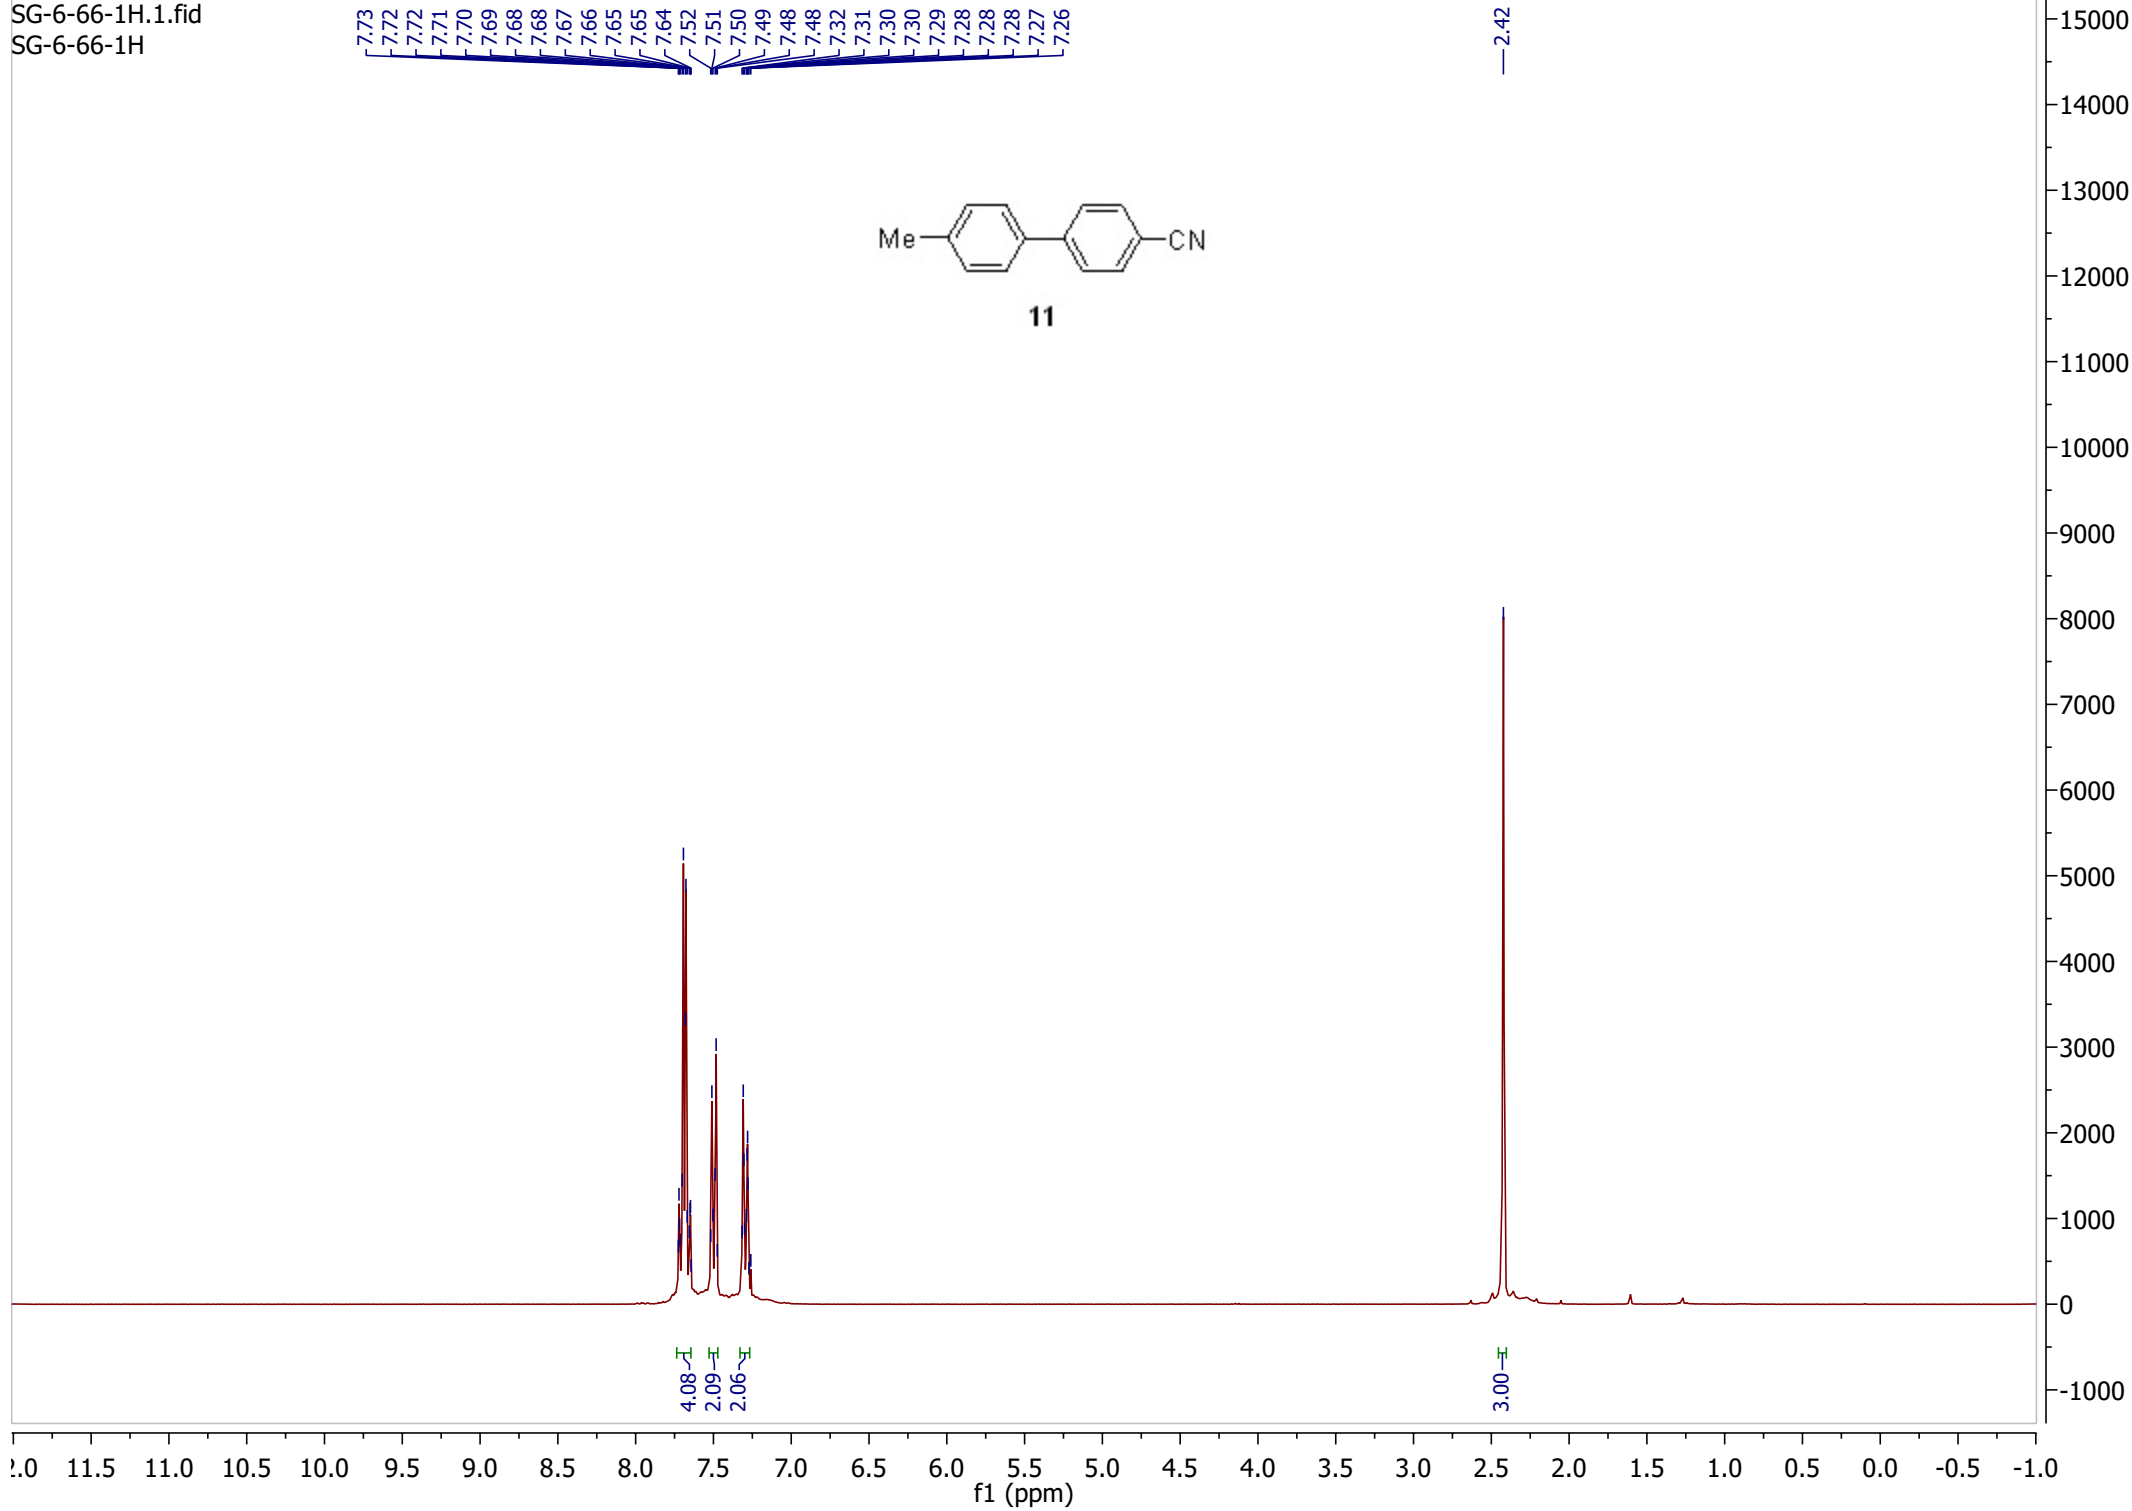

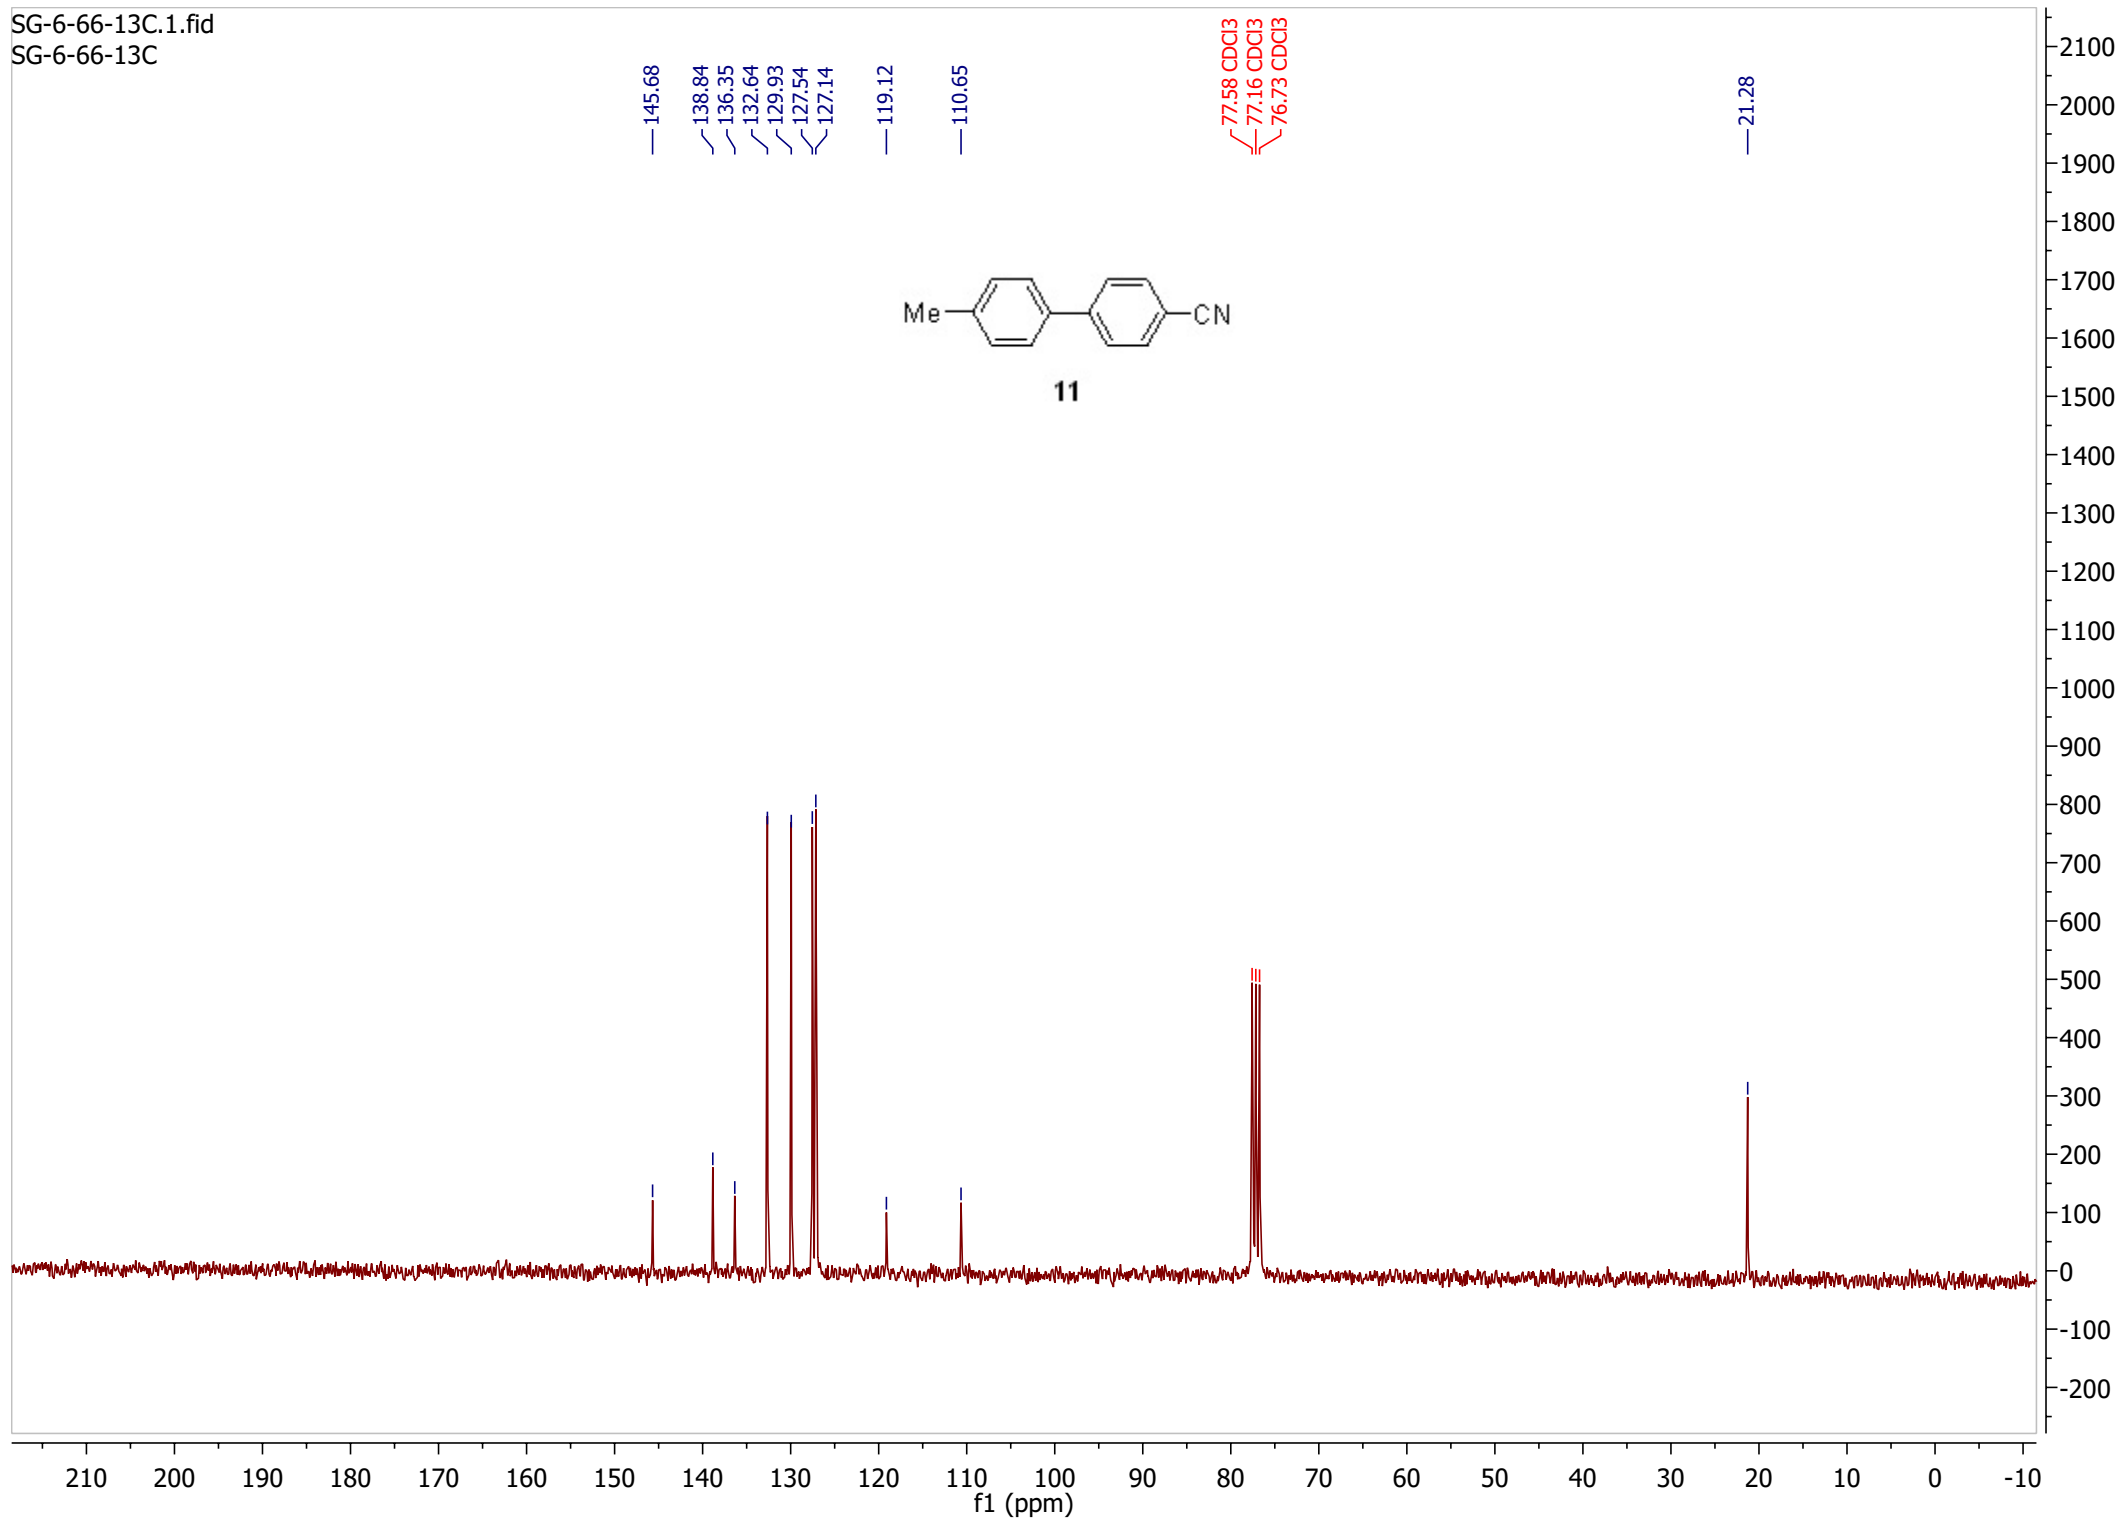



SG-6-81-113.1.fid  
SG-6-81-113

7.75  
7.75  
7.75  
7.74  
7.74  
7.72  
7.71  
7.71  
7.70  
7.69  
7.67  
7.67  
7.67  
7.66  
7.66  
7.64  
7.64  
7.64  
7.63  
7.51  
7.51  
7.50  
7.49  
7.49  
7.48  
7.48  
7.46  
7.46  
7.46  
7.42  
7.42  
7.41  
7.40  
7.39  
7.39  
7.37  
7.37  
7.26

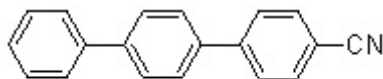

12

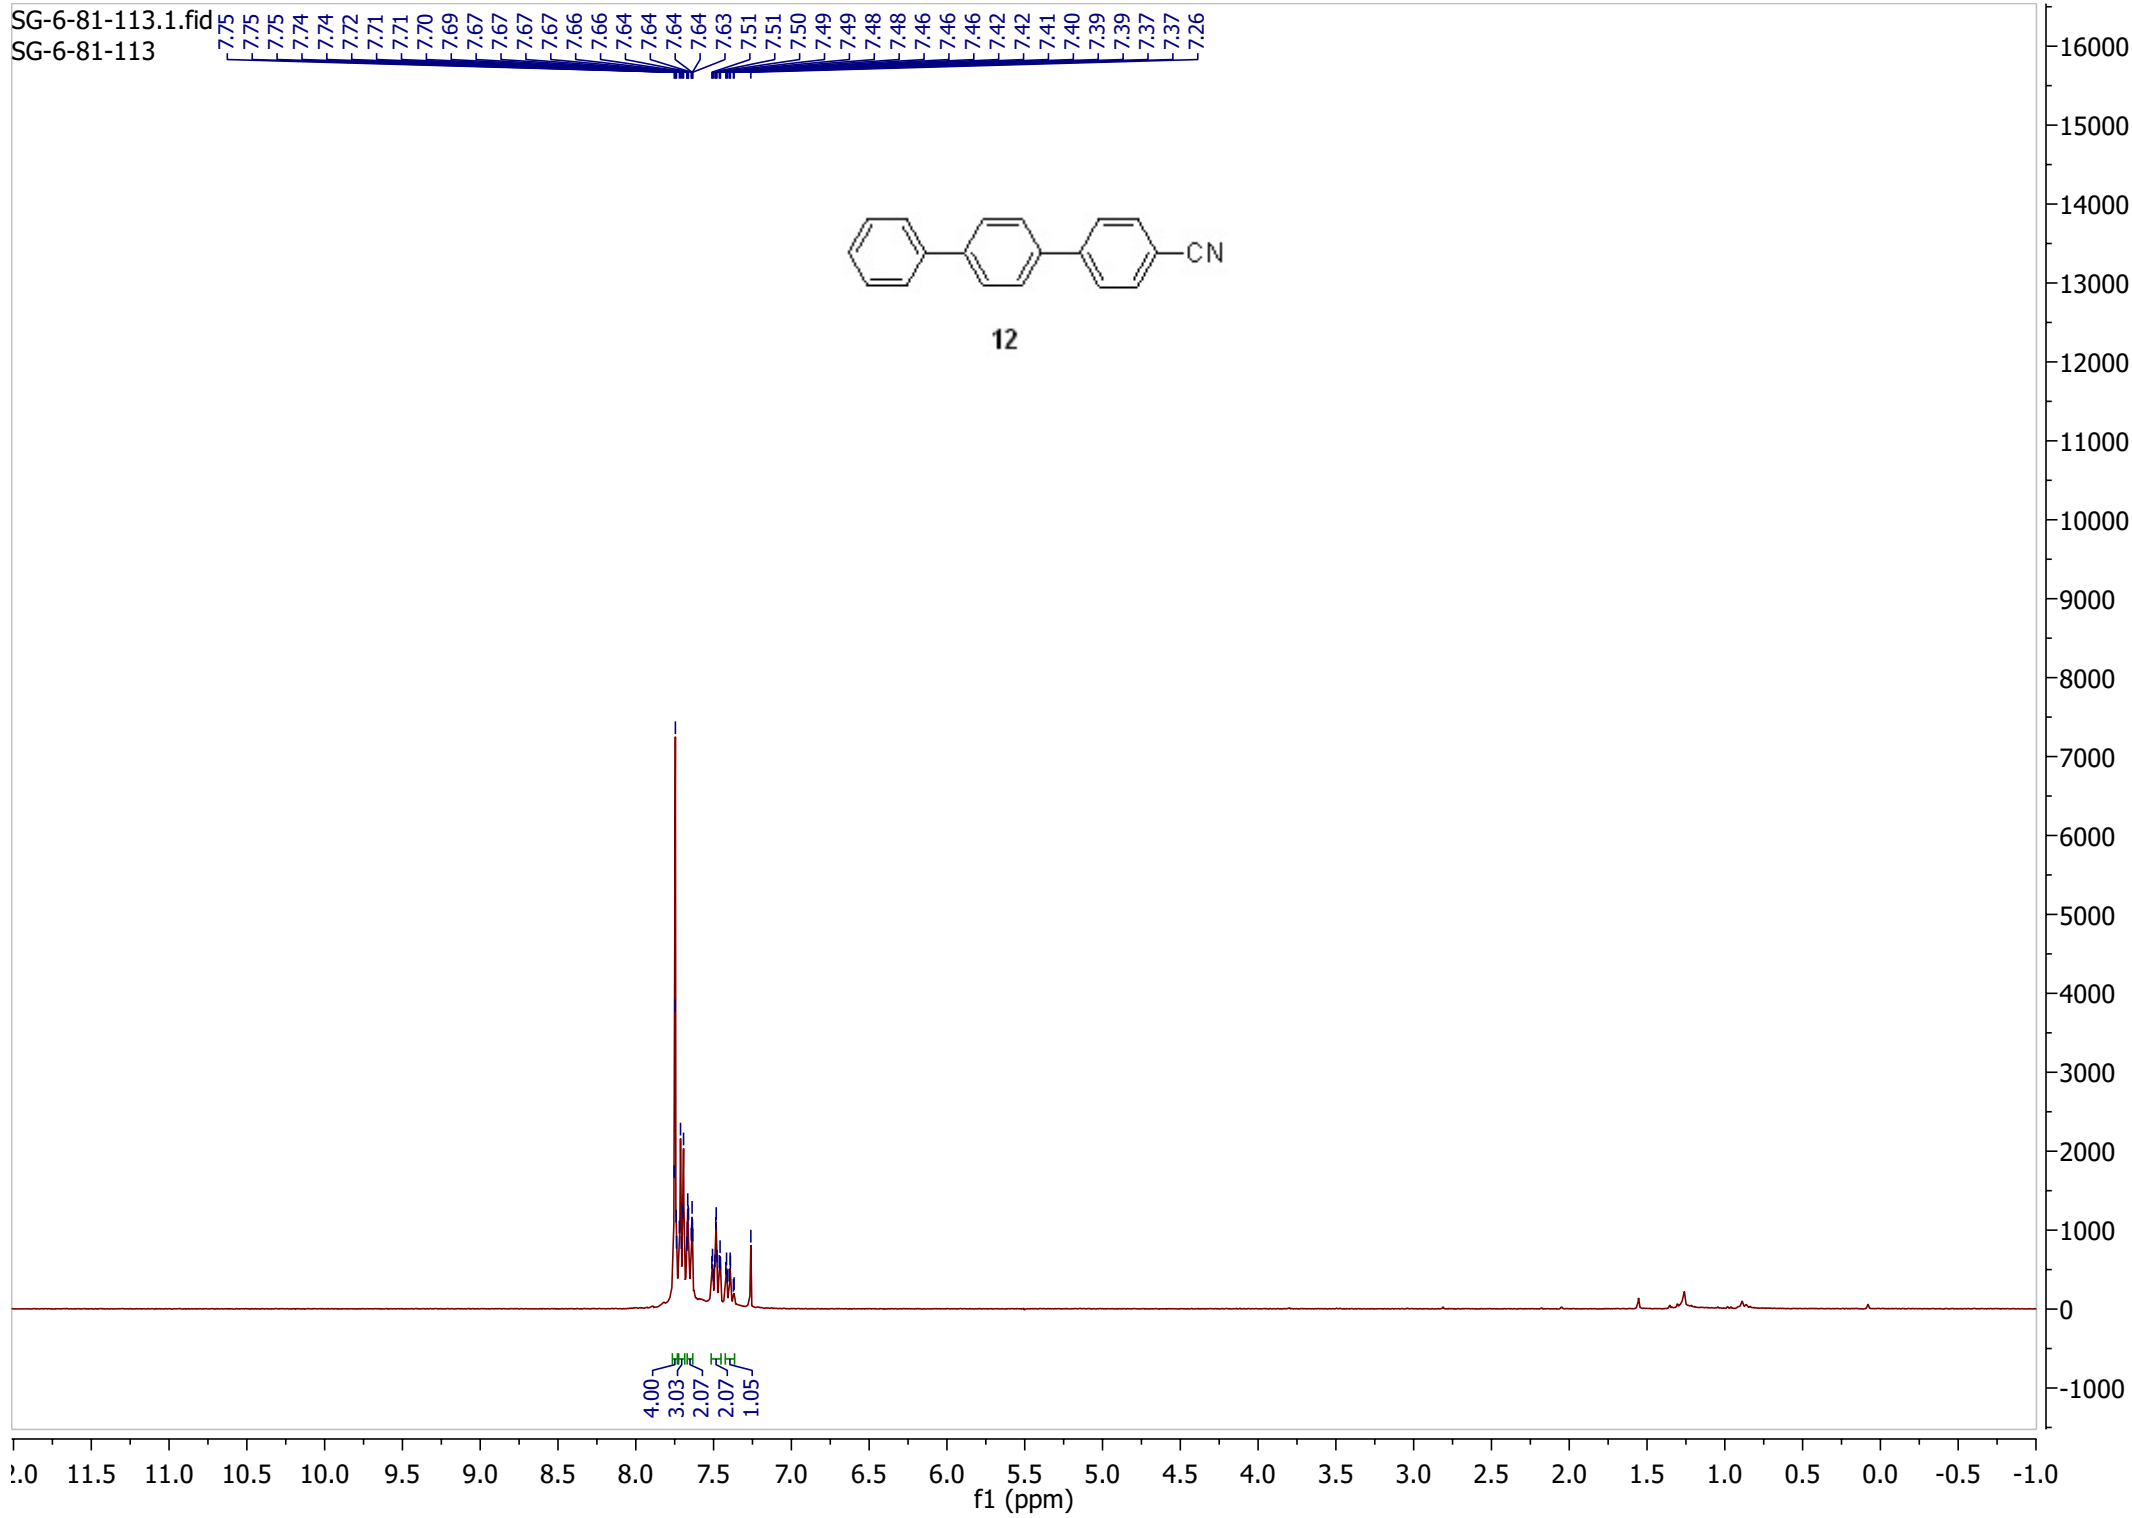

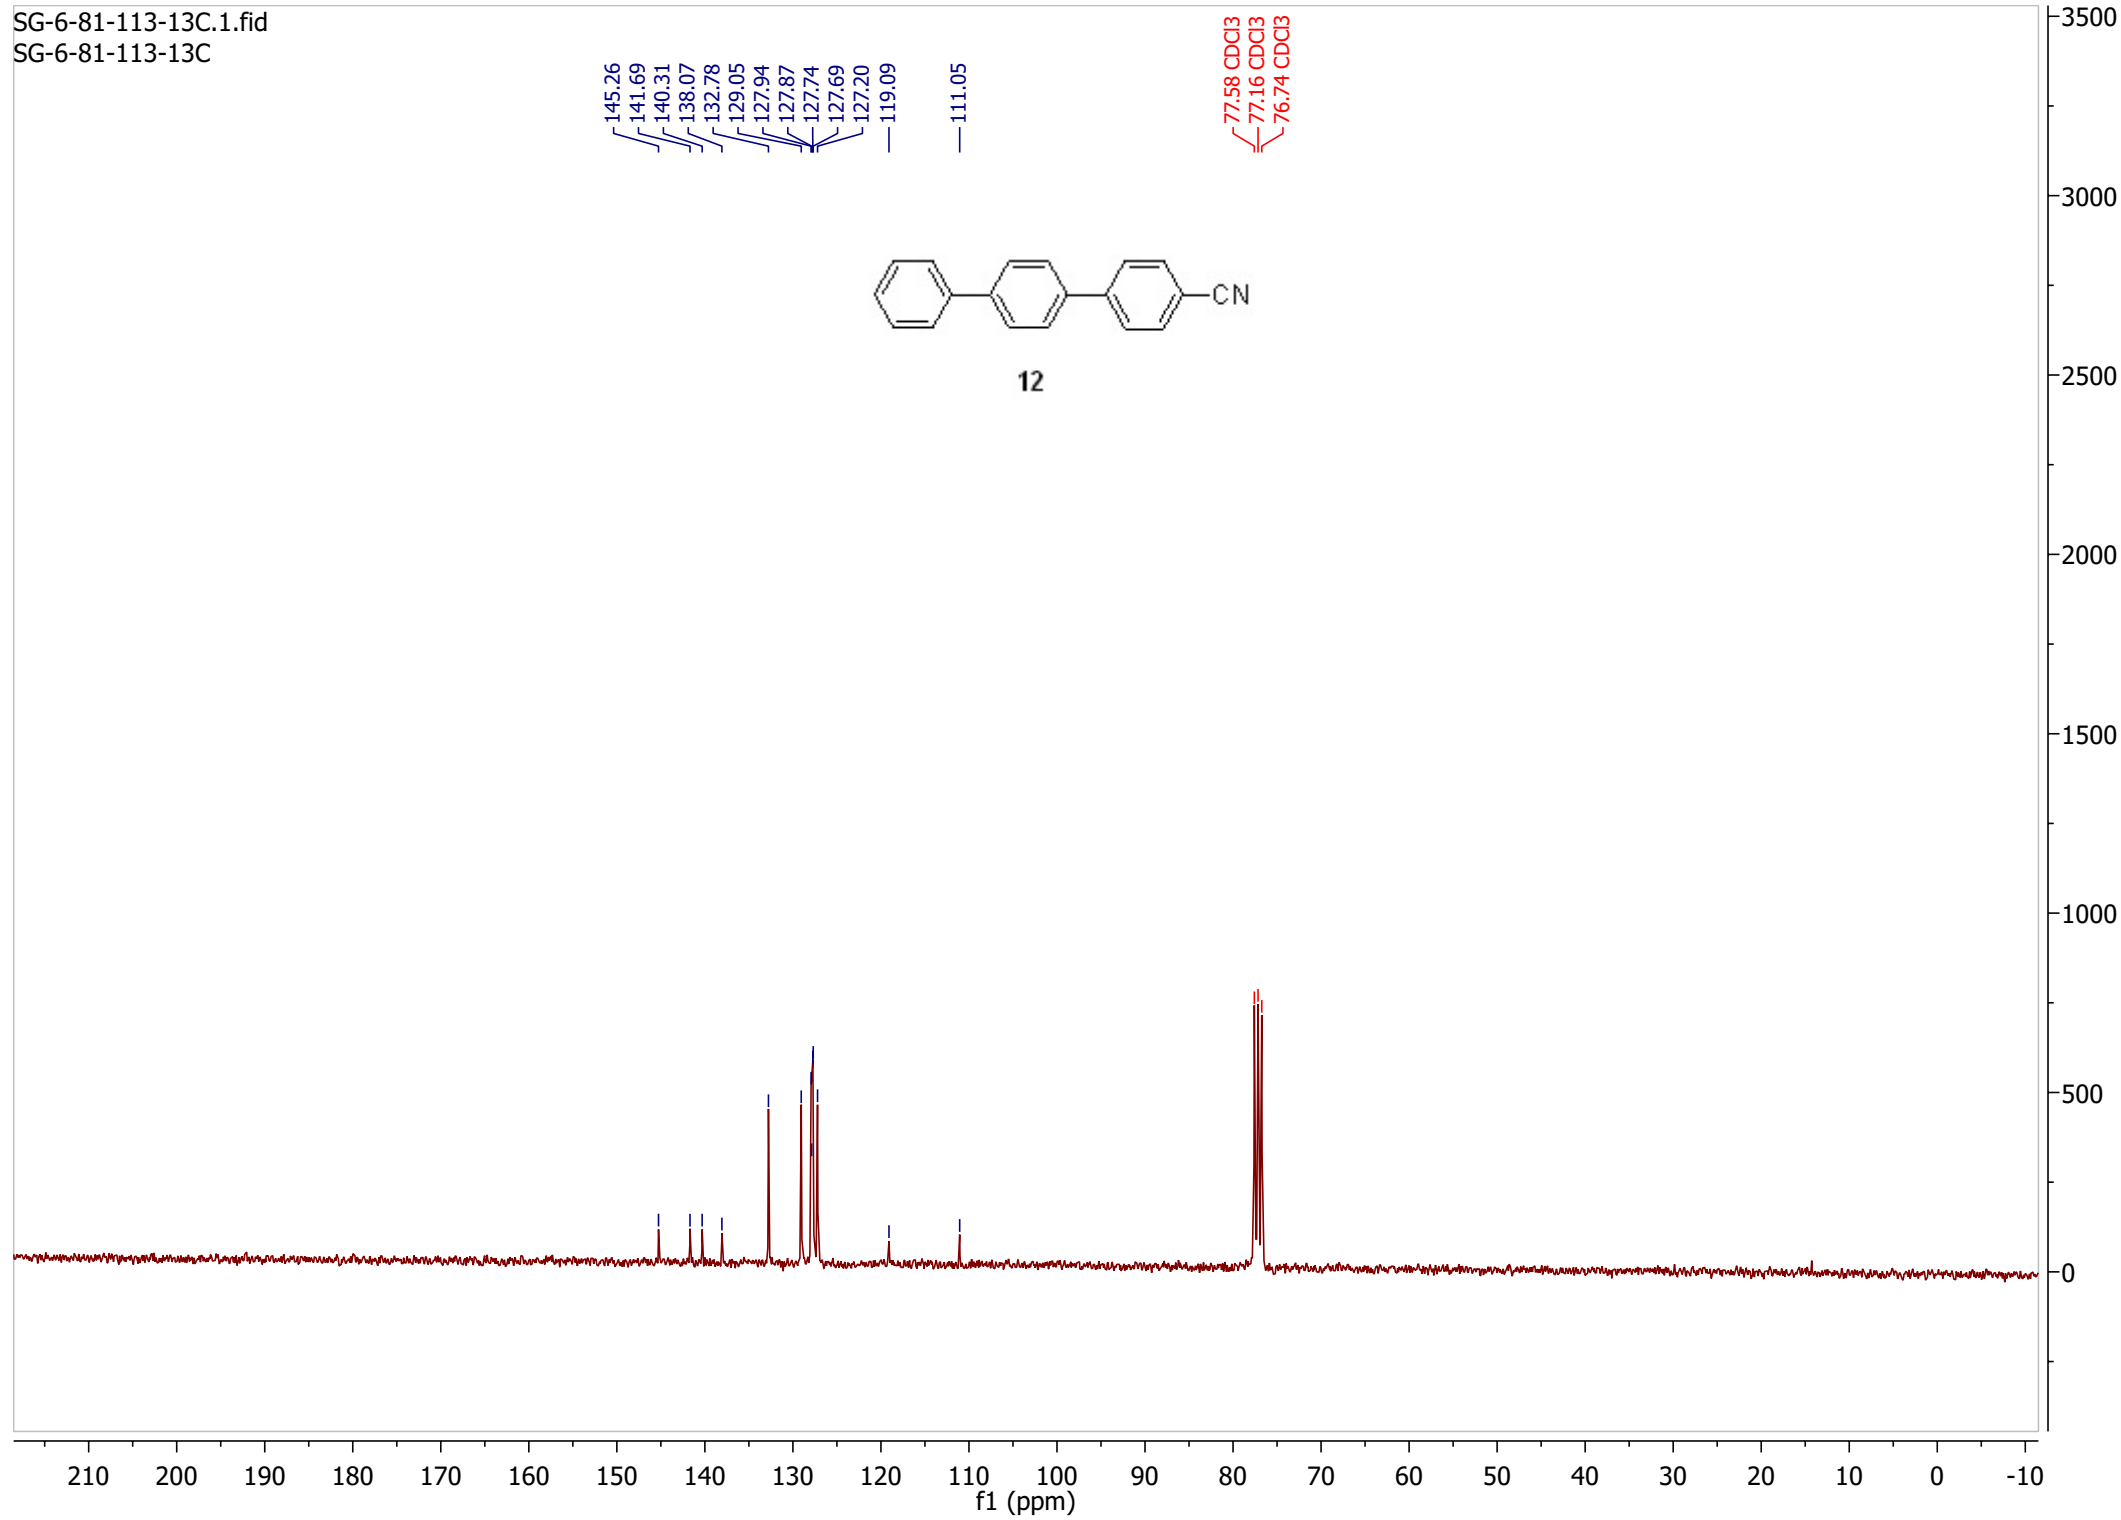

SG-6-93-1.1.fid  
SG-6-93-1

8.02  
7.94  
7.94  
7.83  
7.83  
7.81  
7.81  
7.80  
7.75  
7.75  
7.74  
7.73  
7.72  
7.72  
7.26

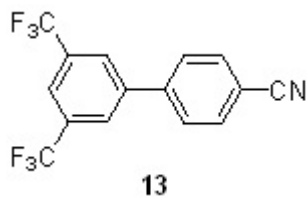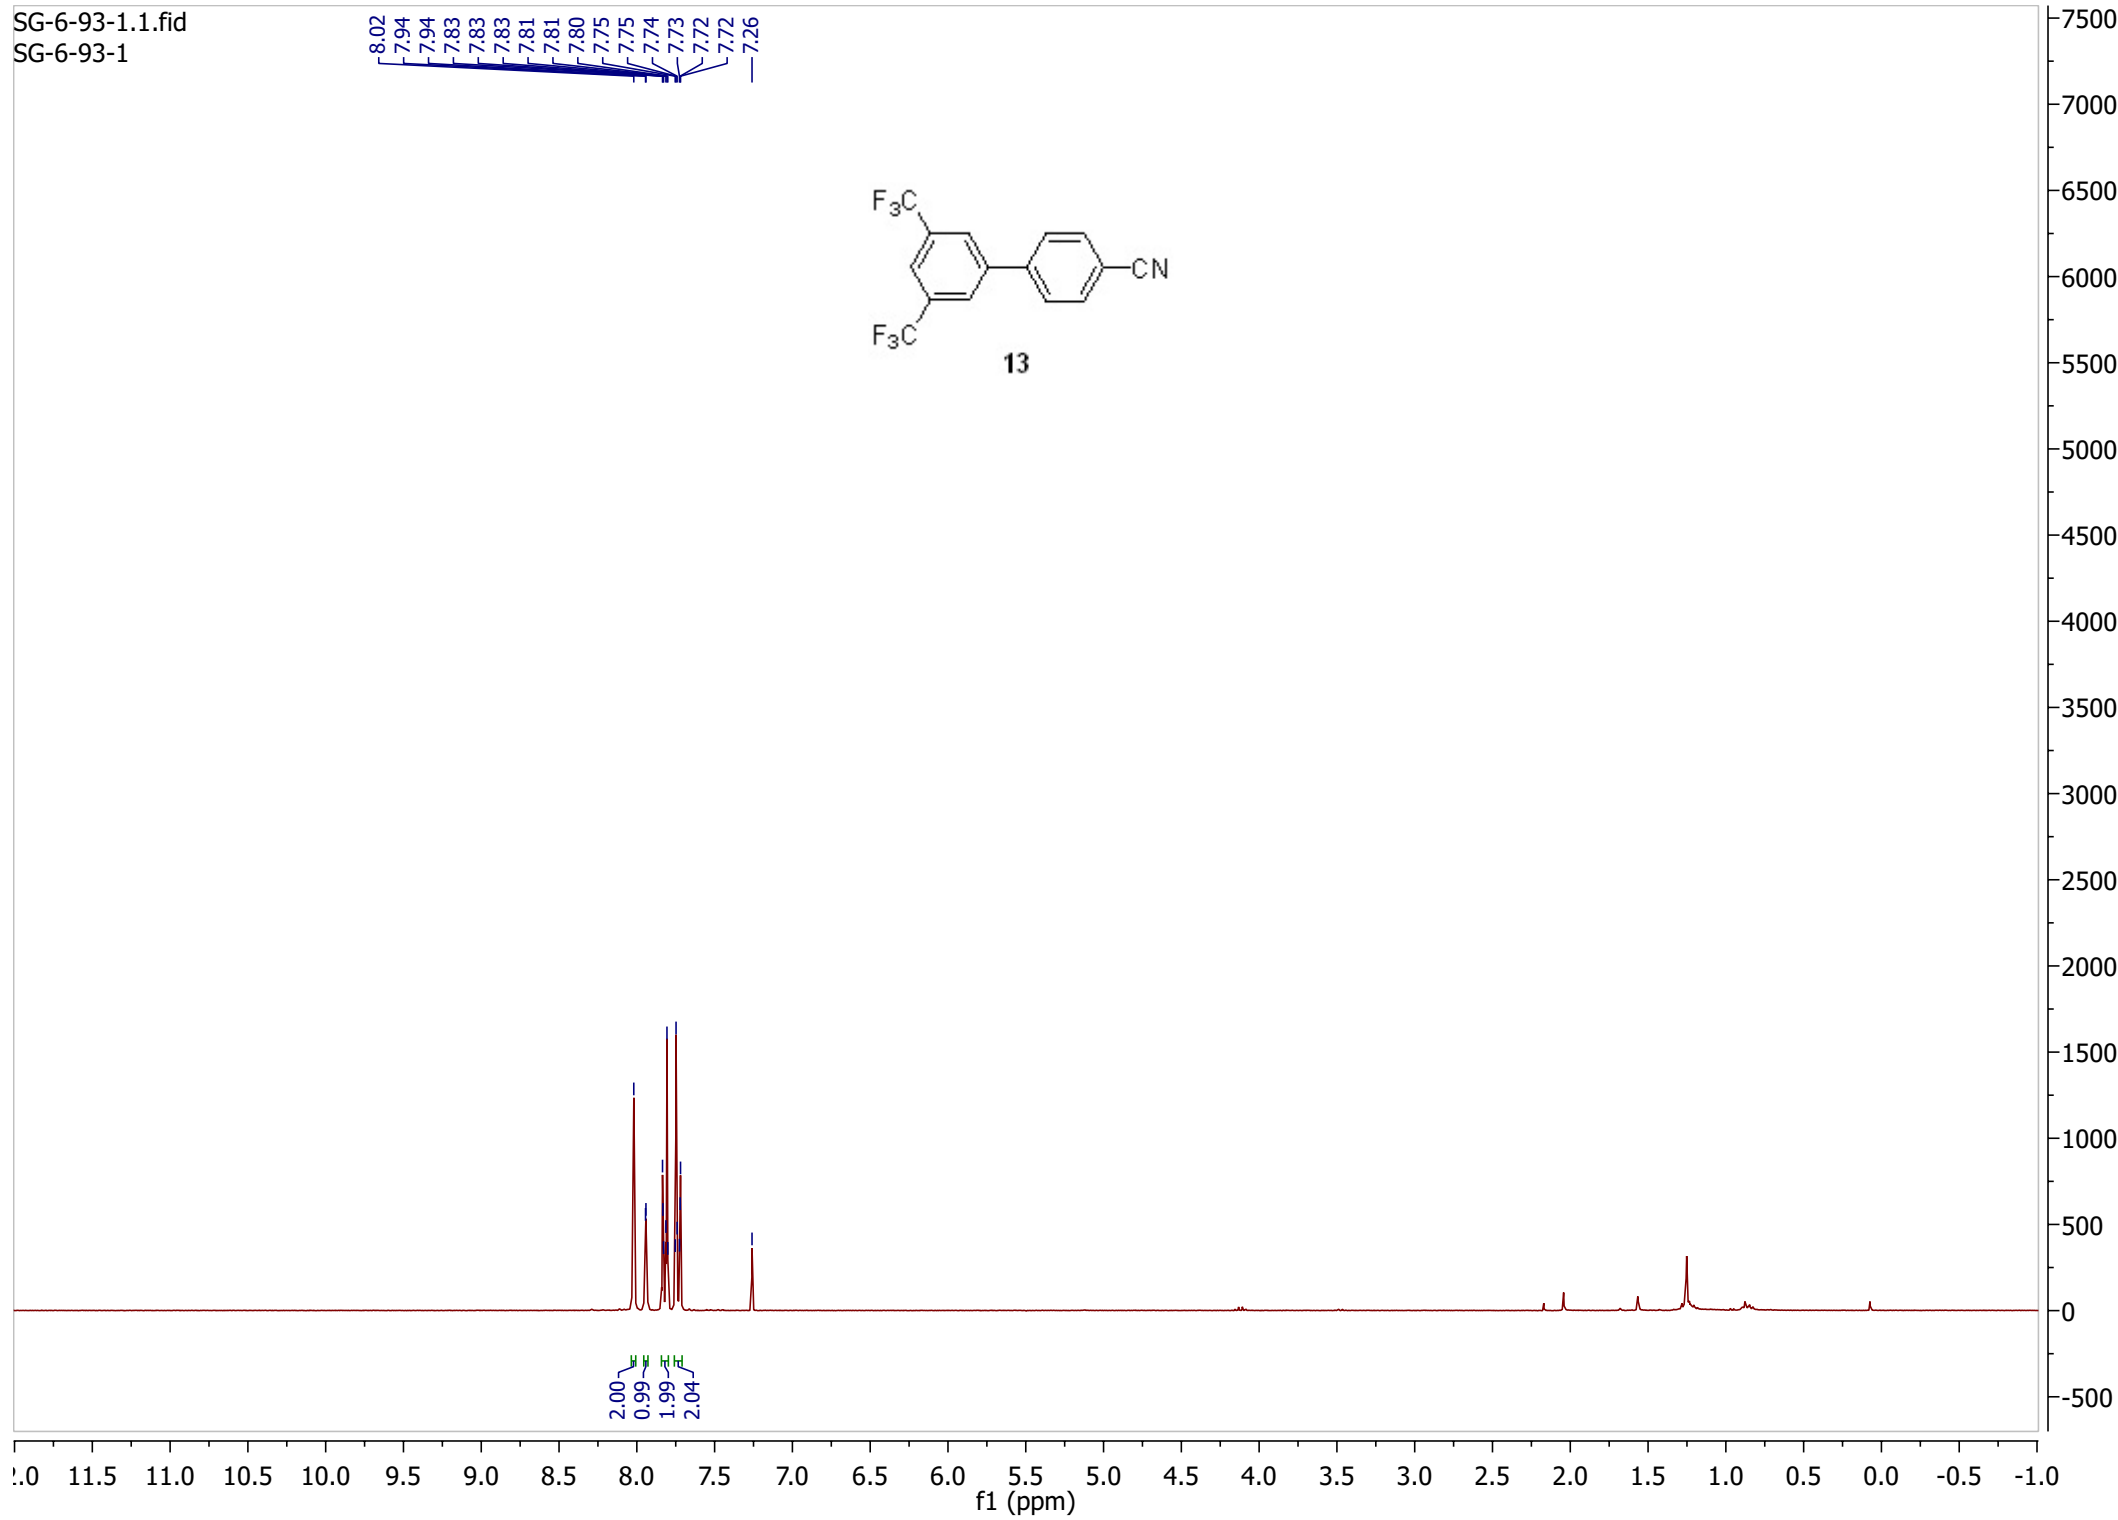

142.63  
141.48  
133.46  
133.20  
133.02  
132.57  
132.13  
128.16  
127.53  
125.06  
122.47  
122.42  
122.36  
121.44  
118.36  
113.01

77.58 CDCl3  
77.16 CDCl3  
76.74 CDCl3

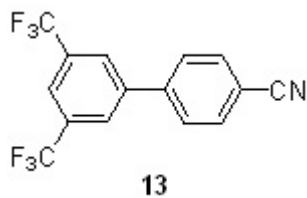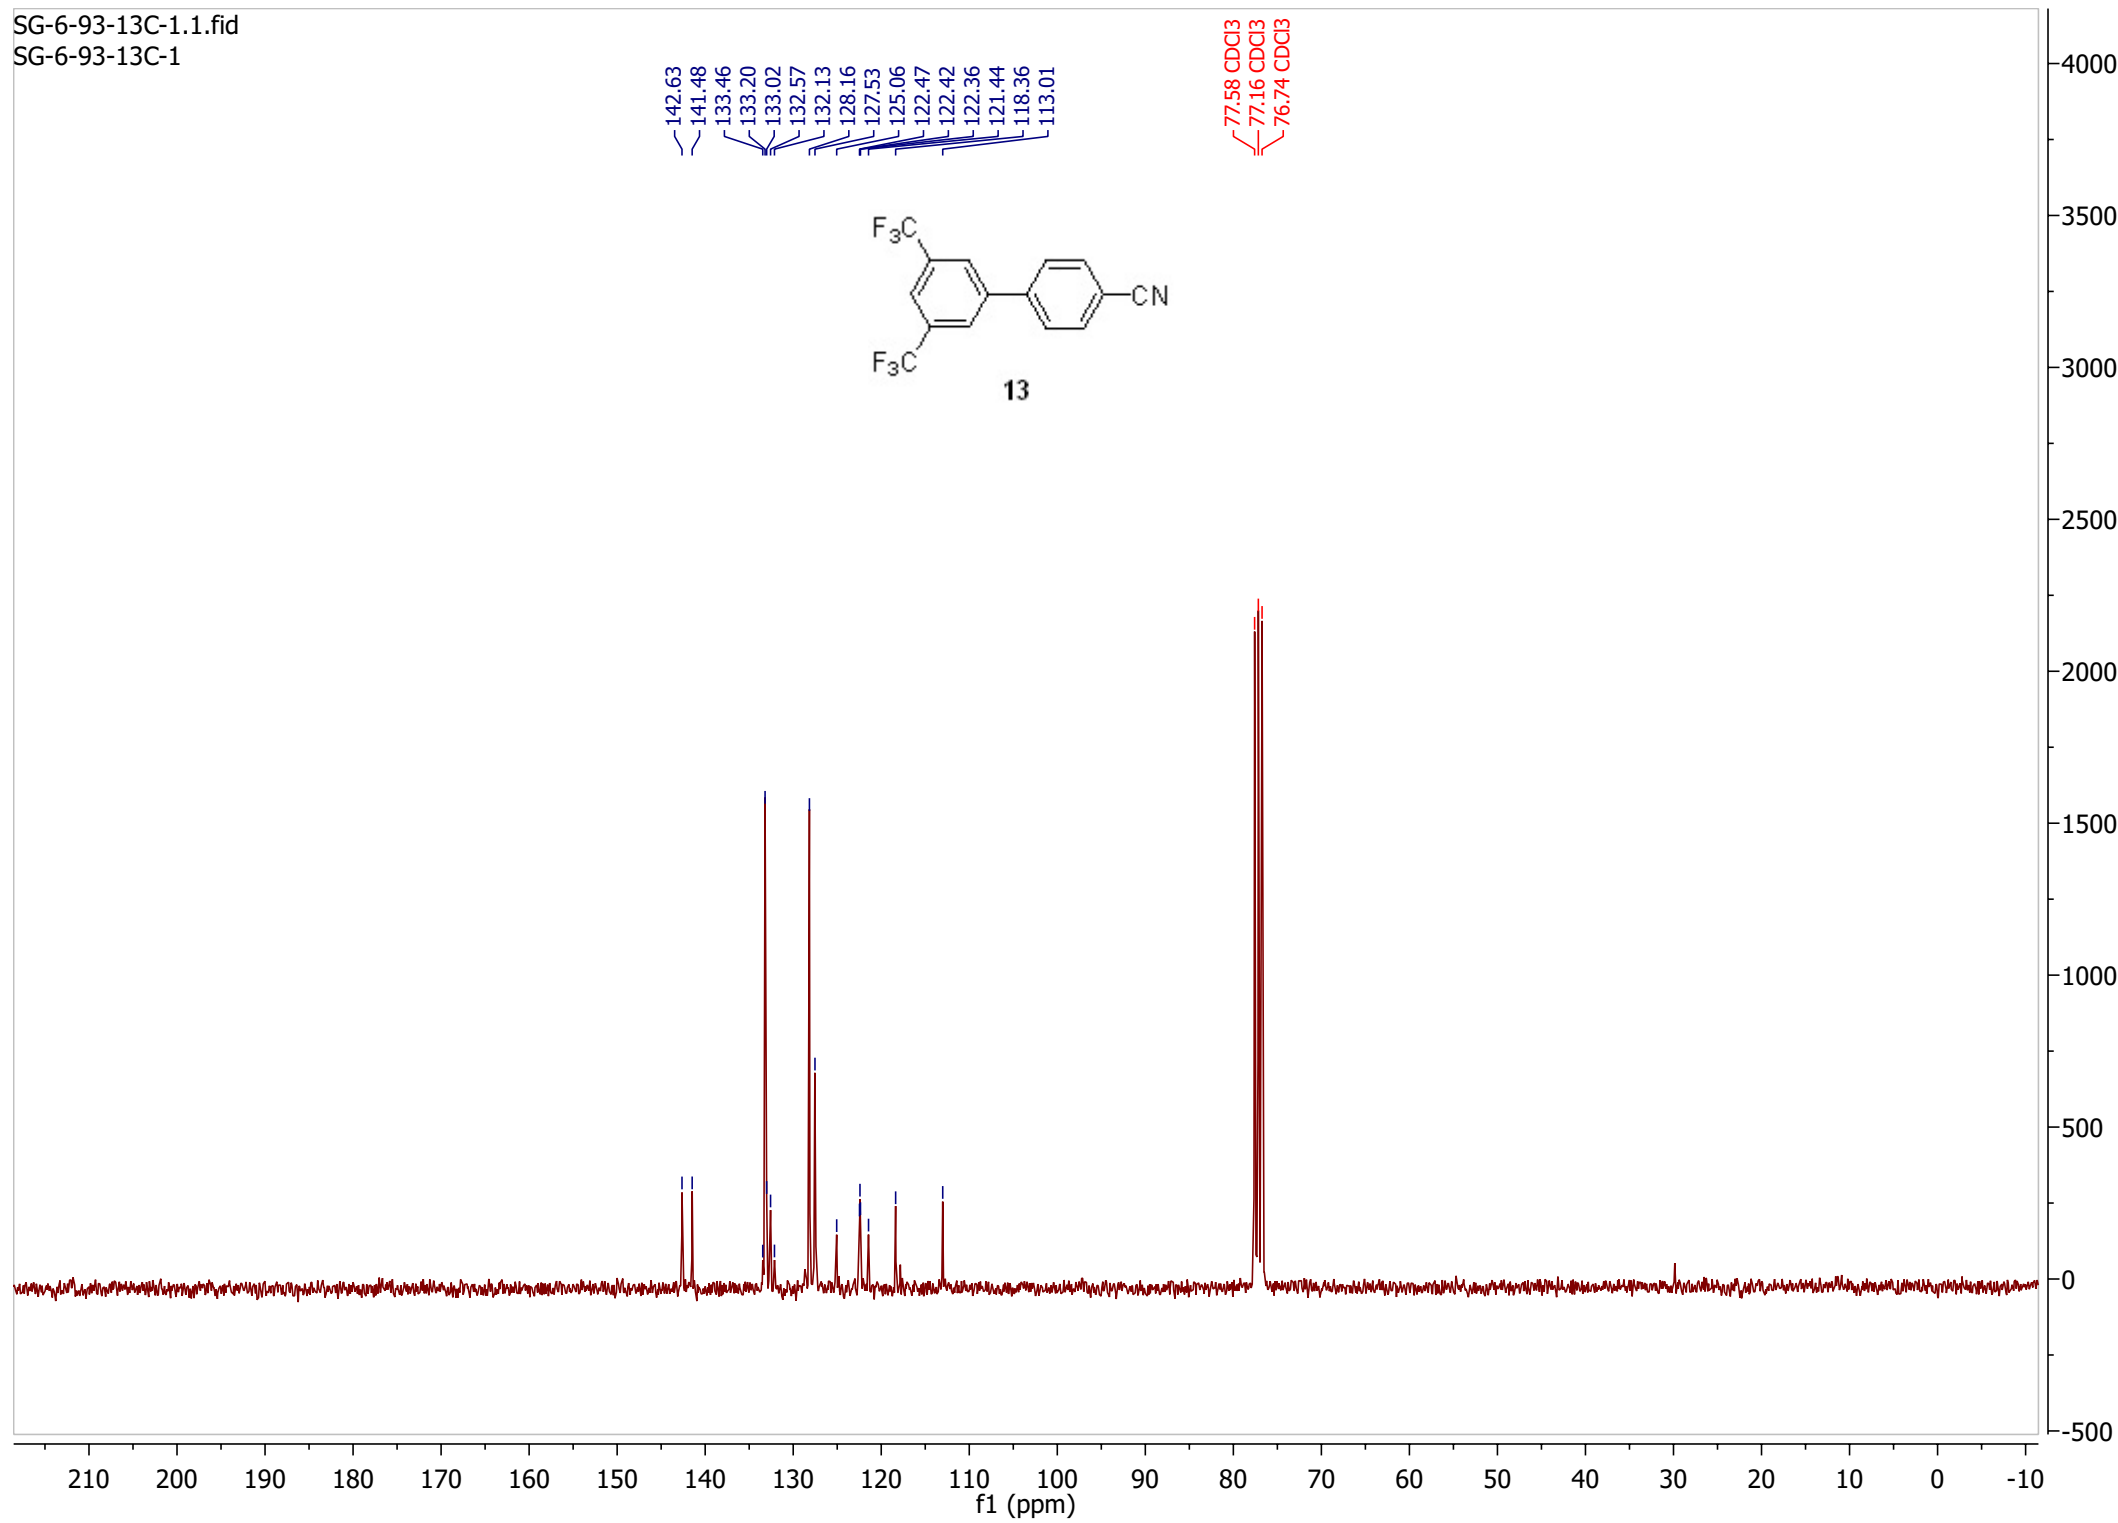

-61.28

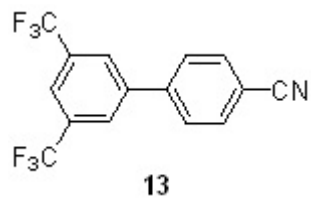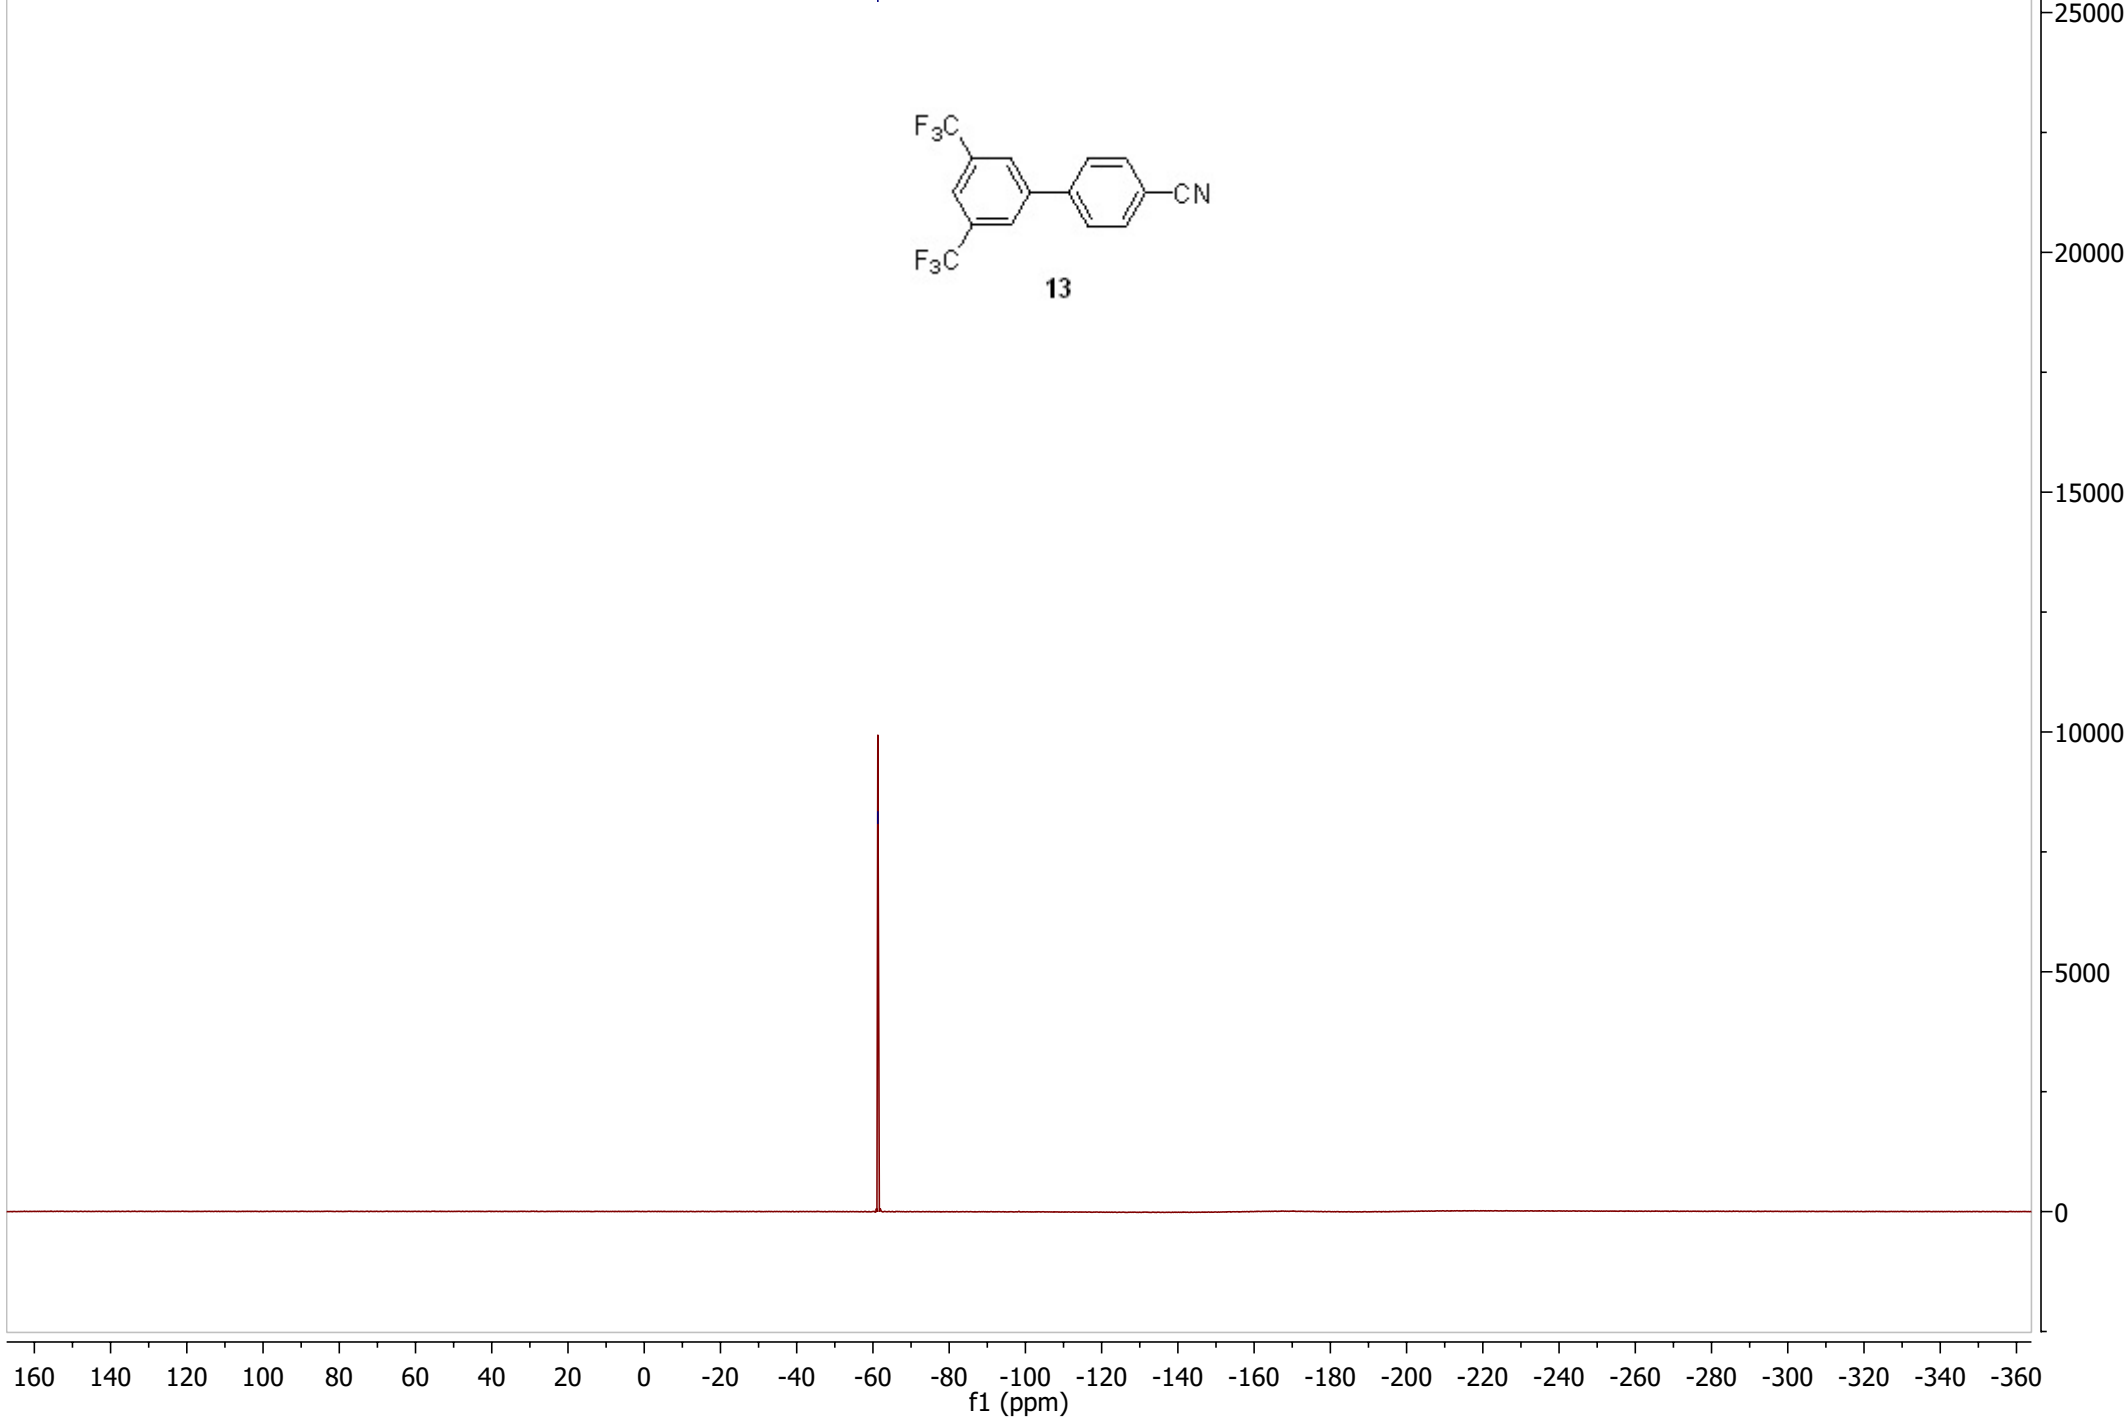

8.02  
7.98  
7.86  
7.86  
7.83  
7.83  
7.77  
7.77  
7.75  
7.74  
7.74  
7.72  
7.72  
7.61  
7.60  
7.58  
7.58  
7.57  
7.55  
7.55  
7.26

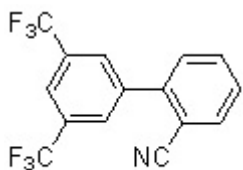

14

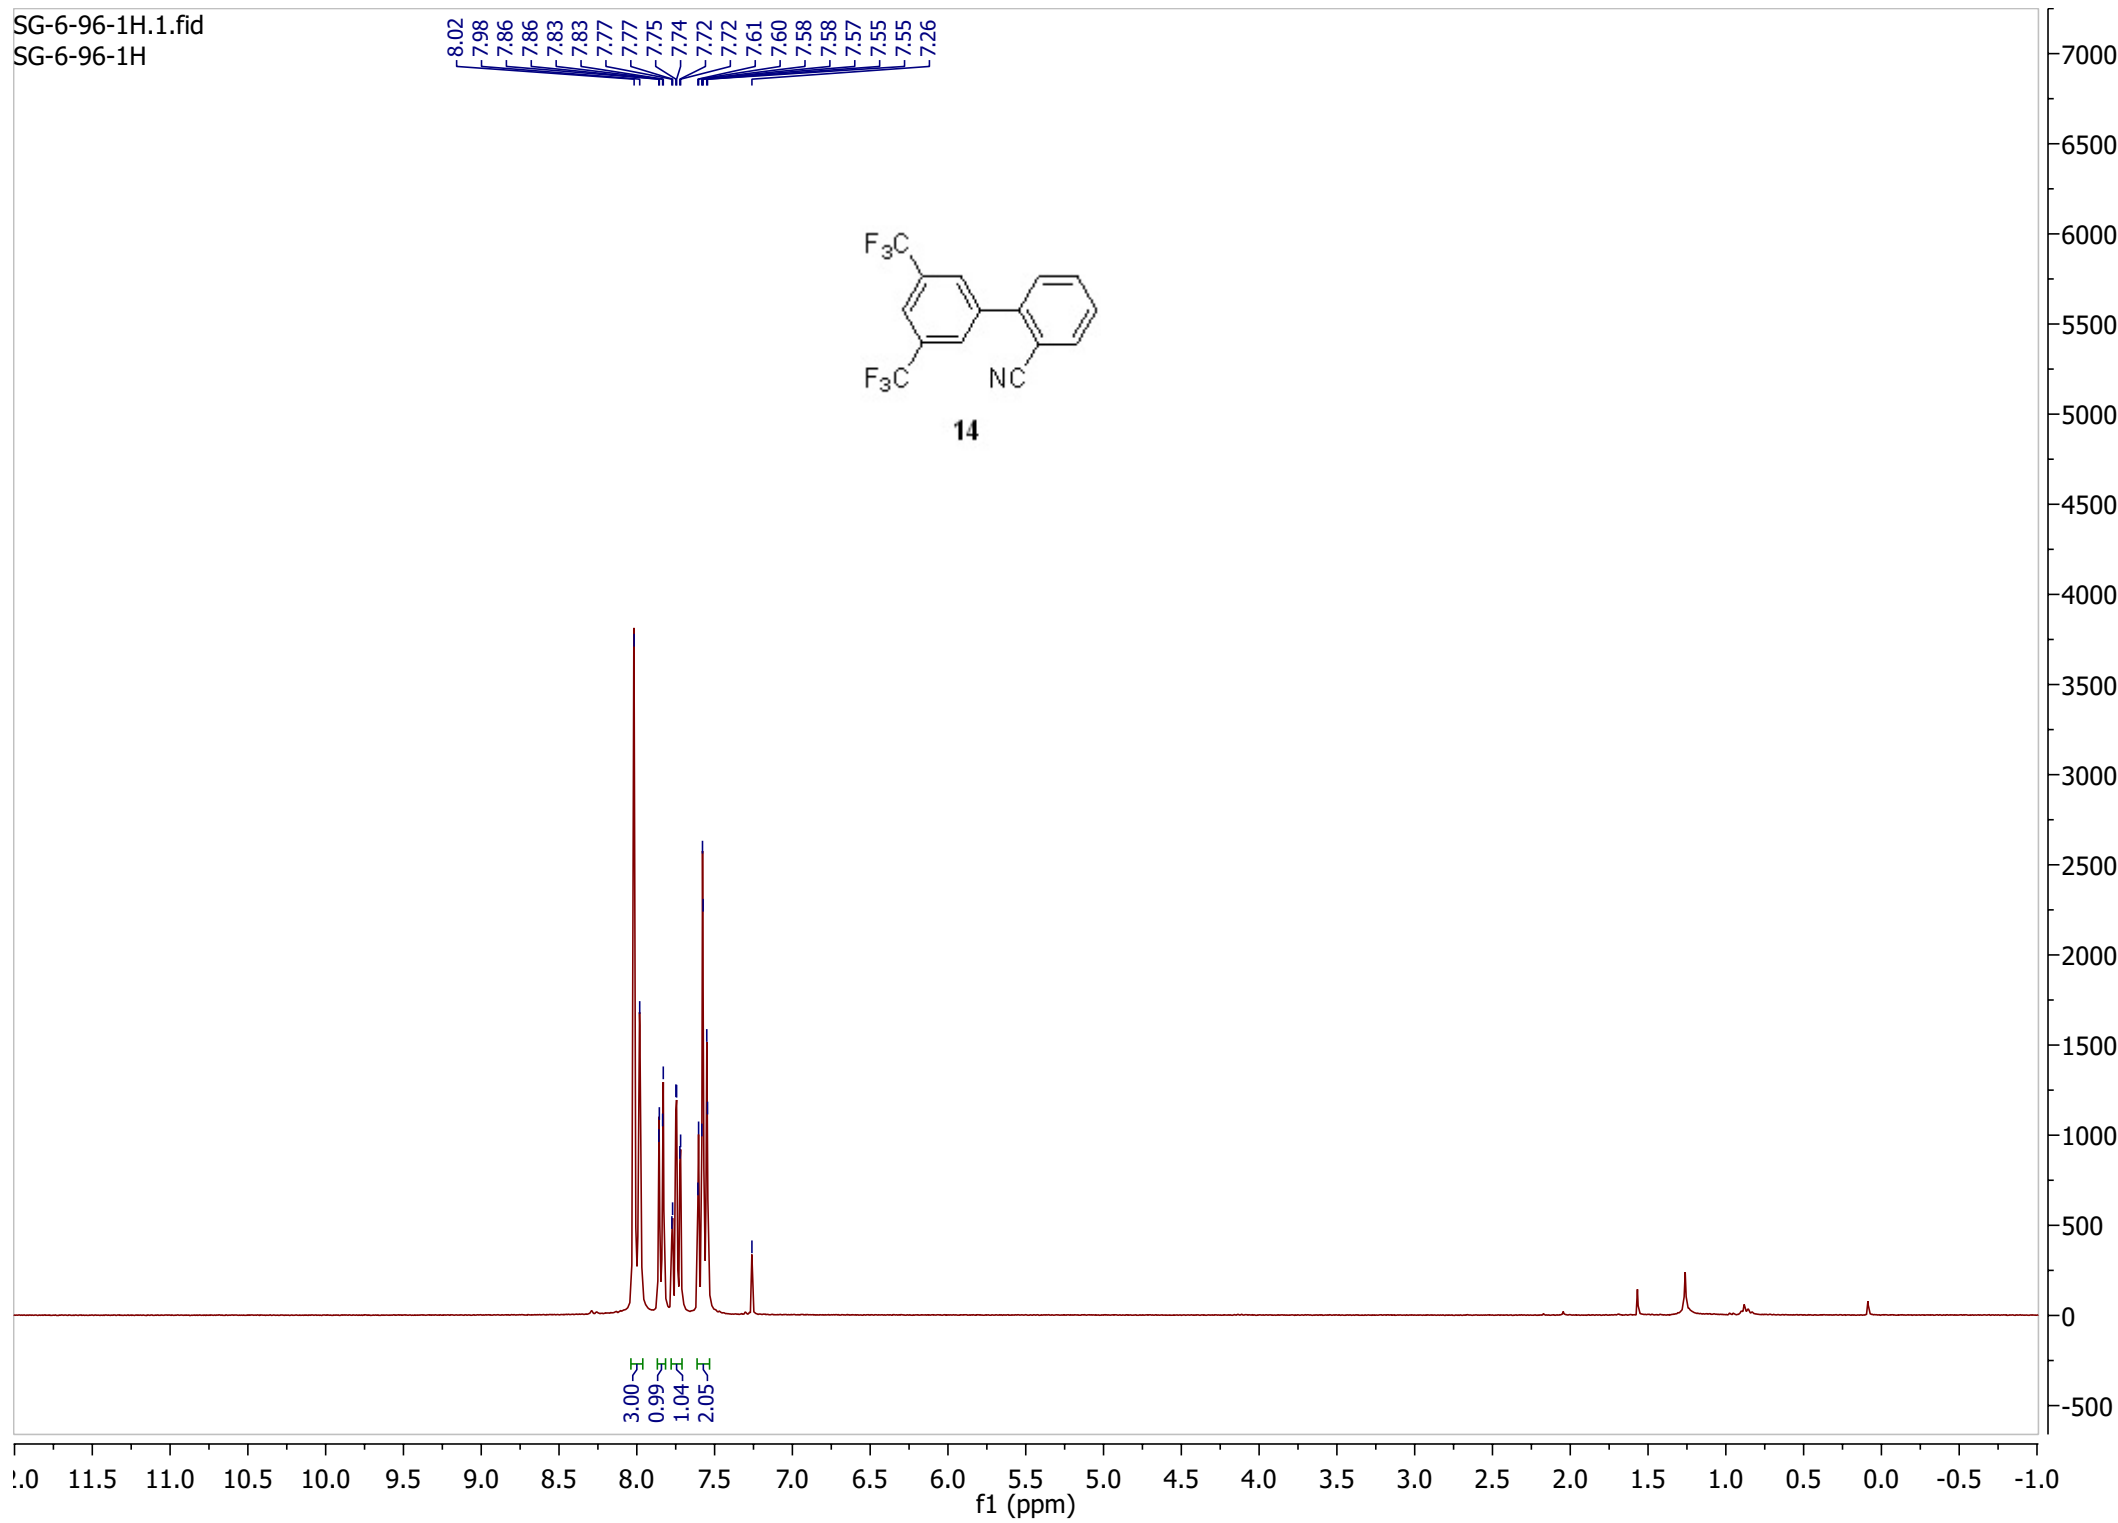

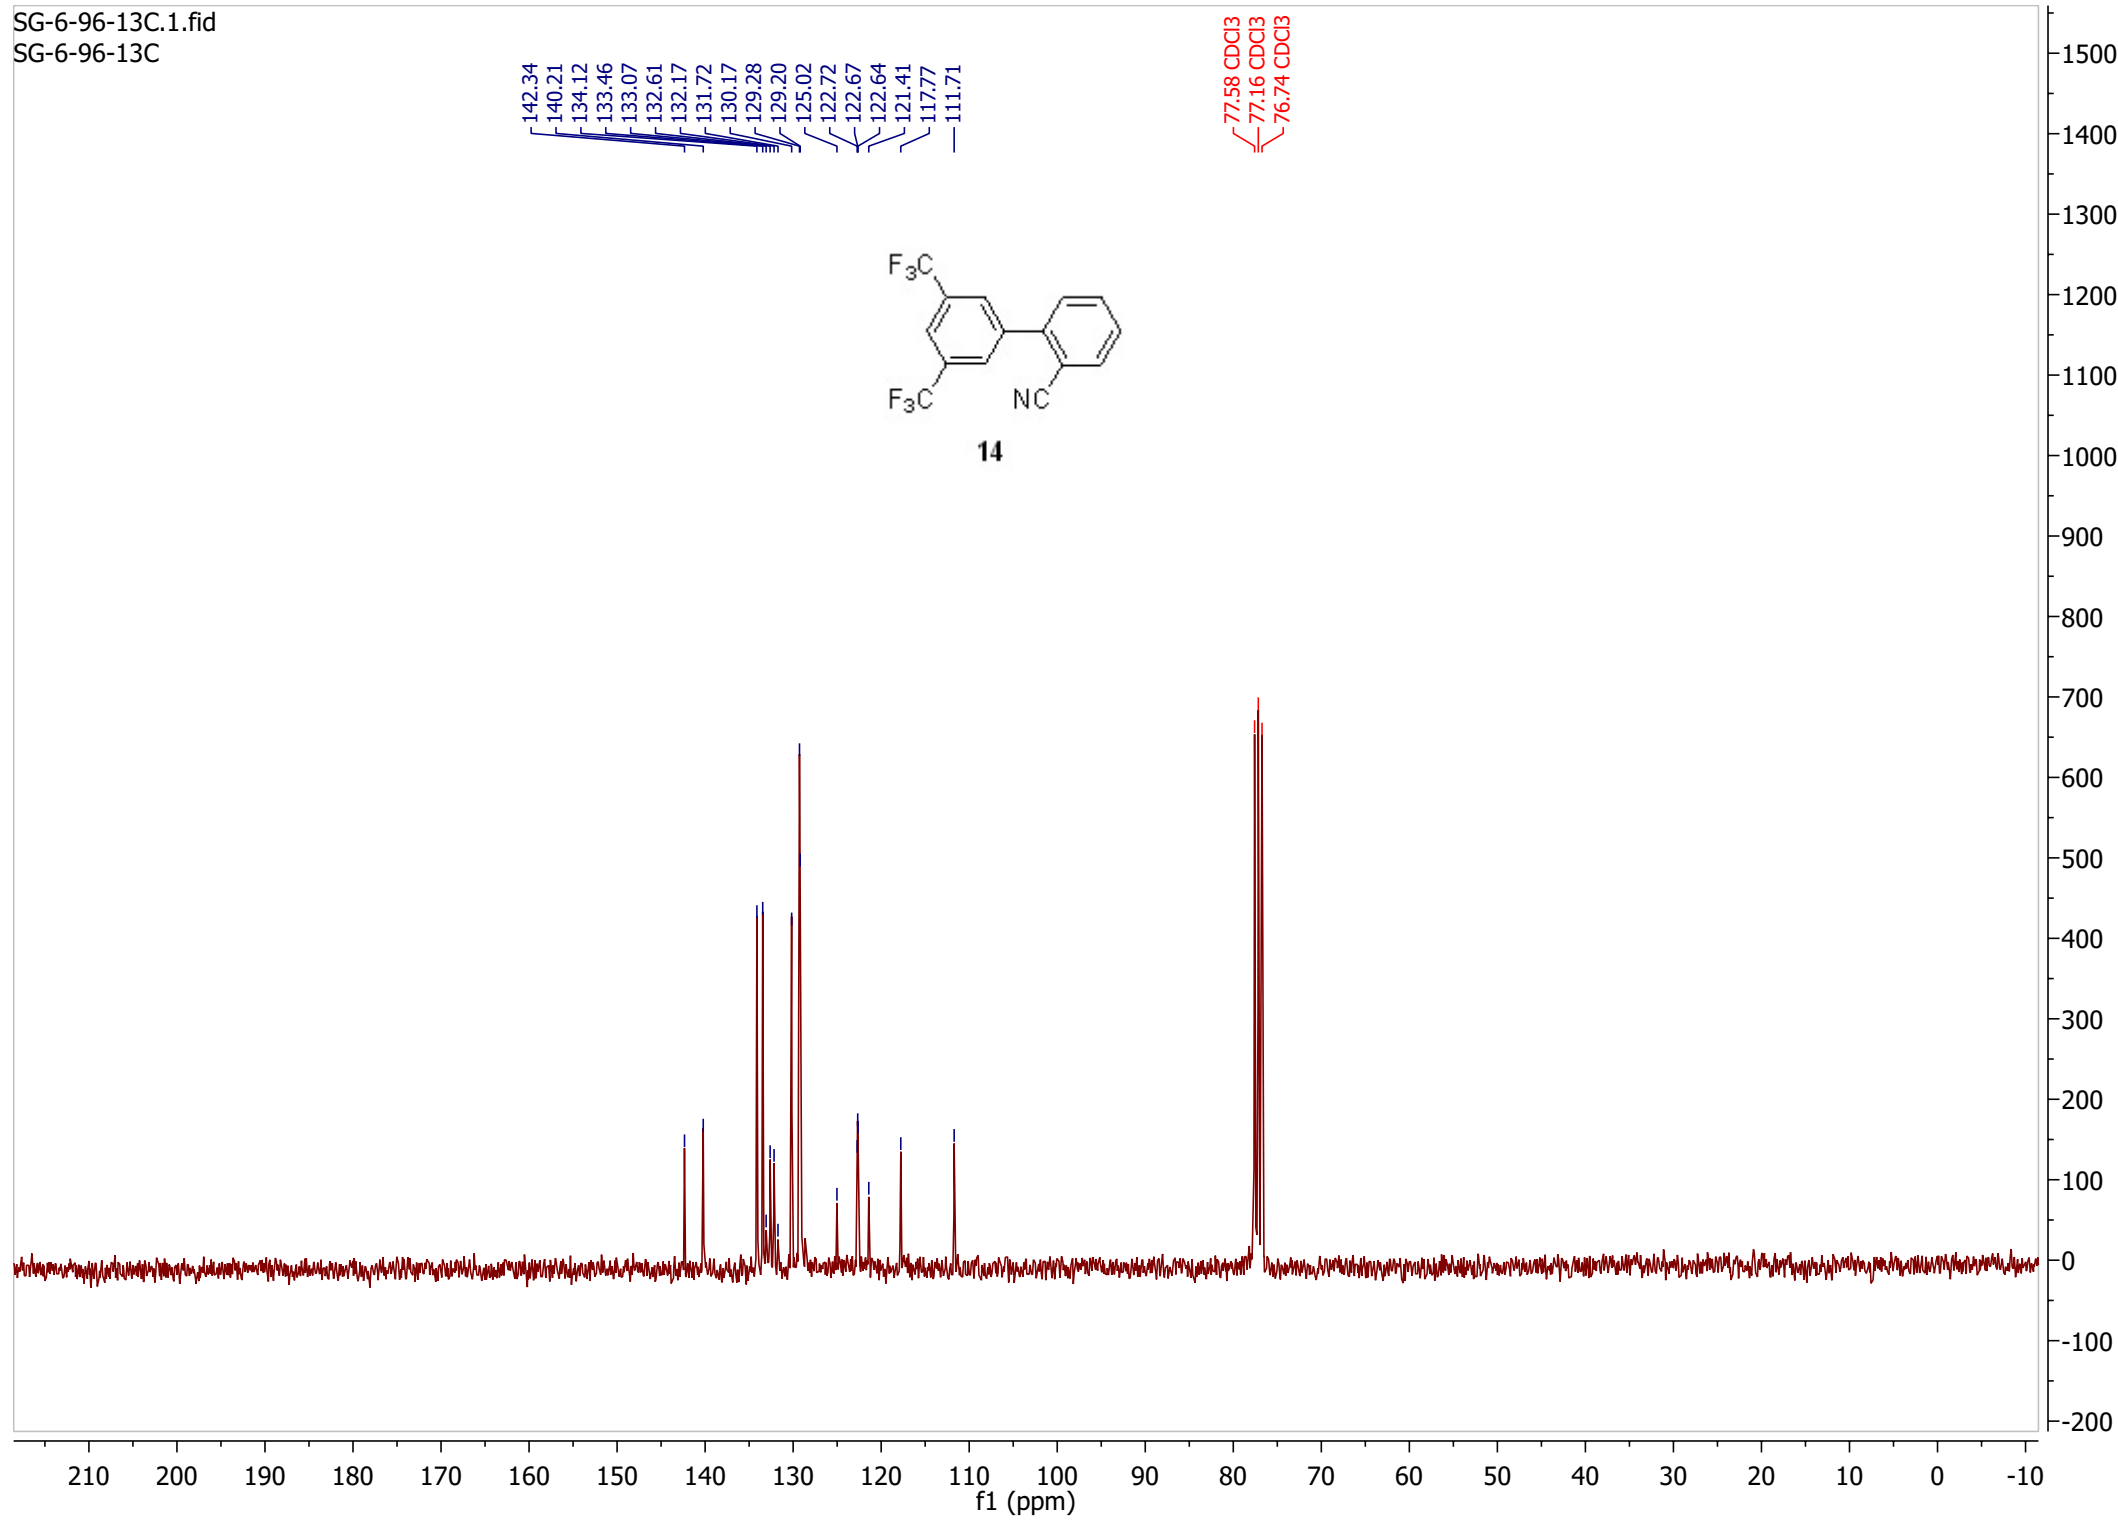

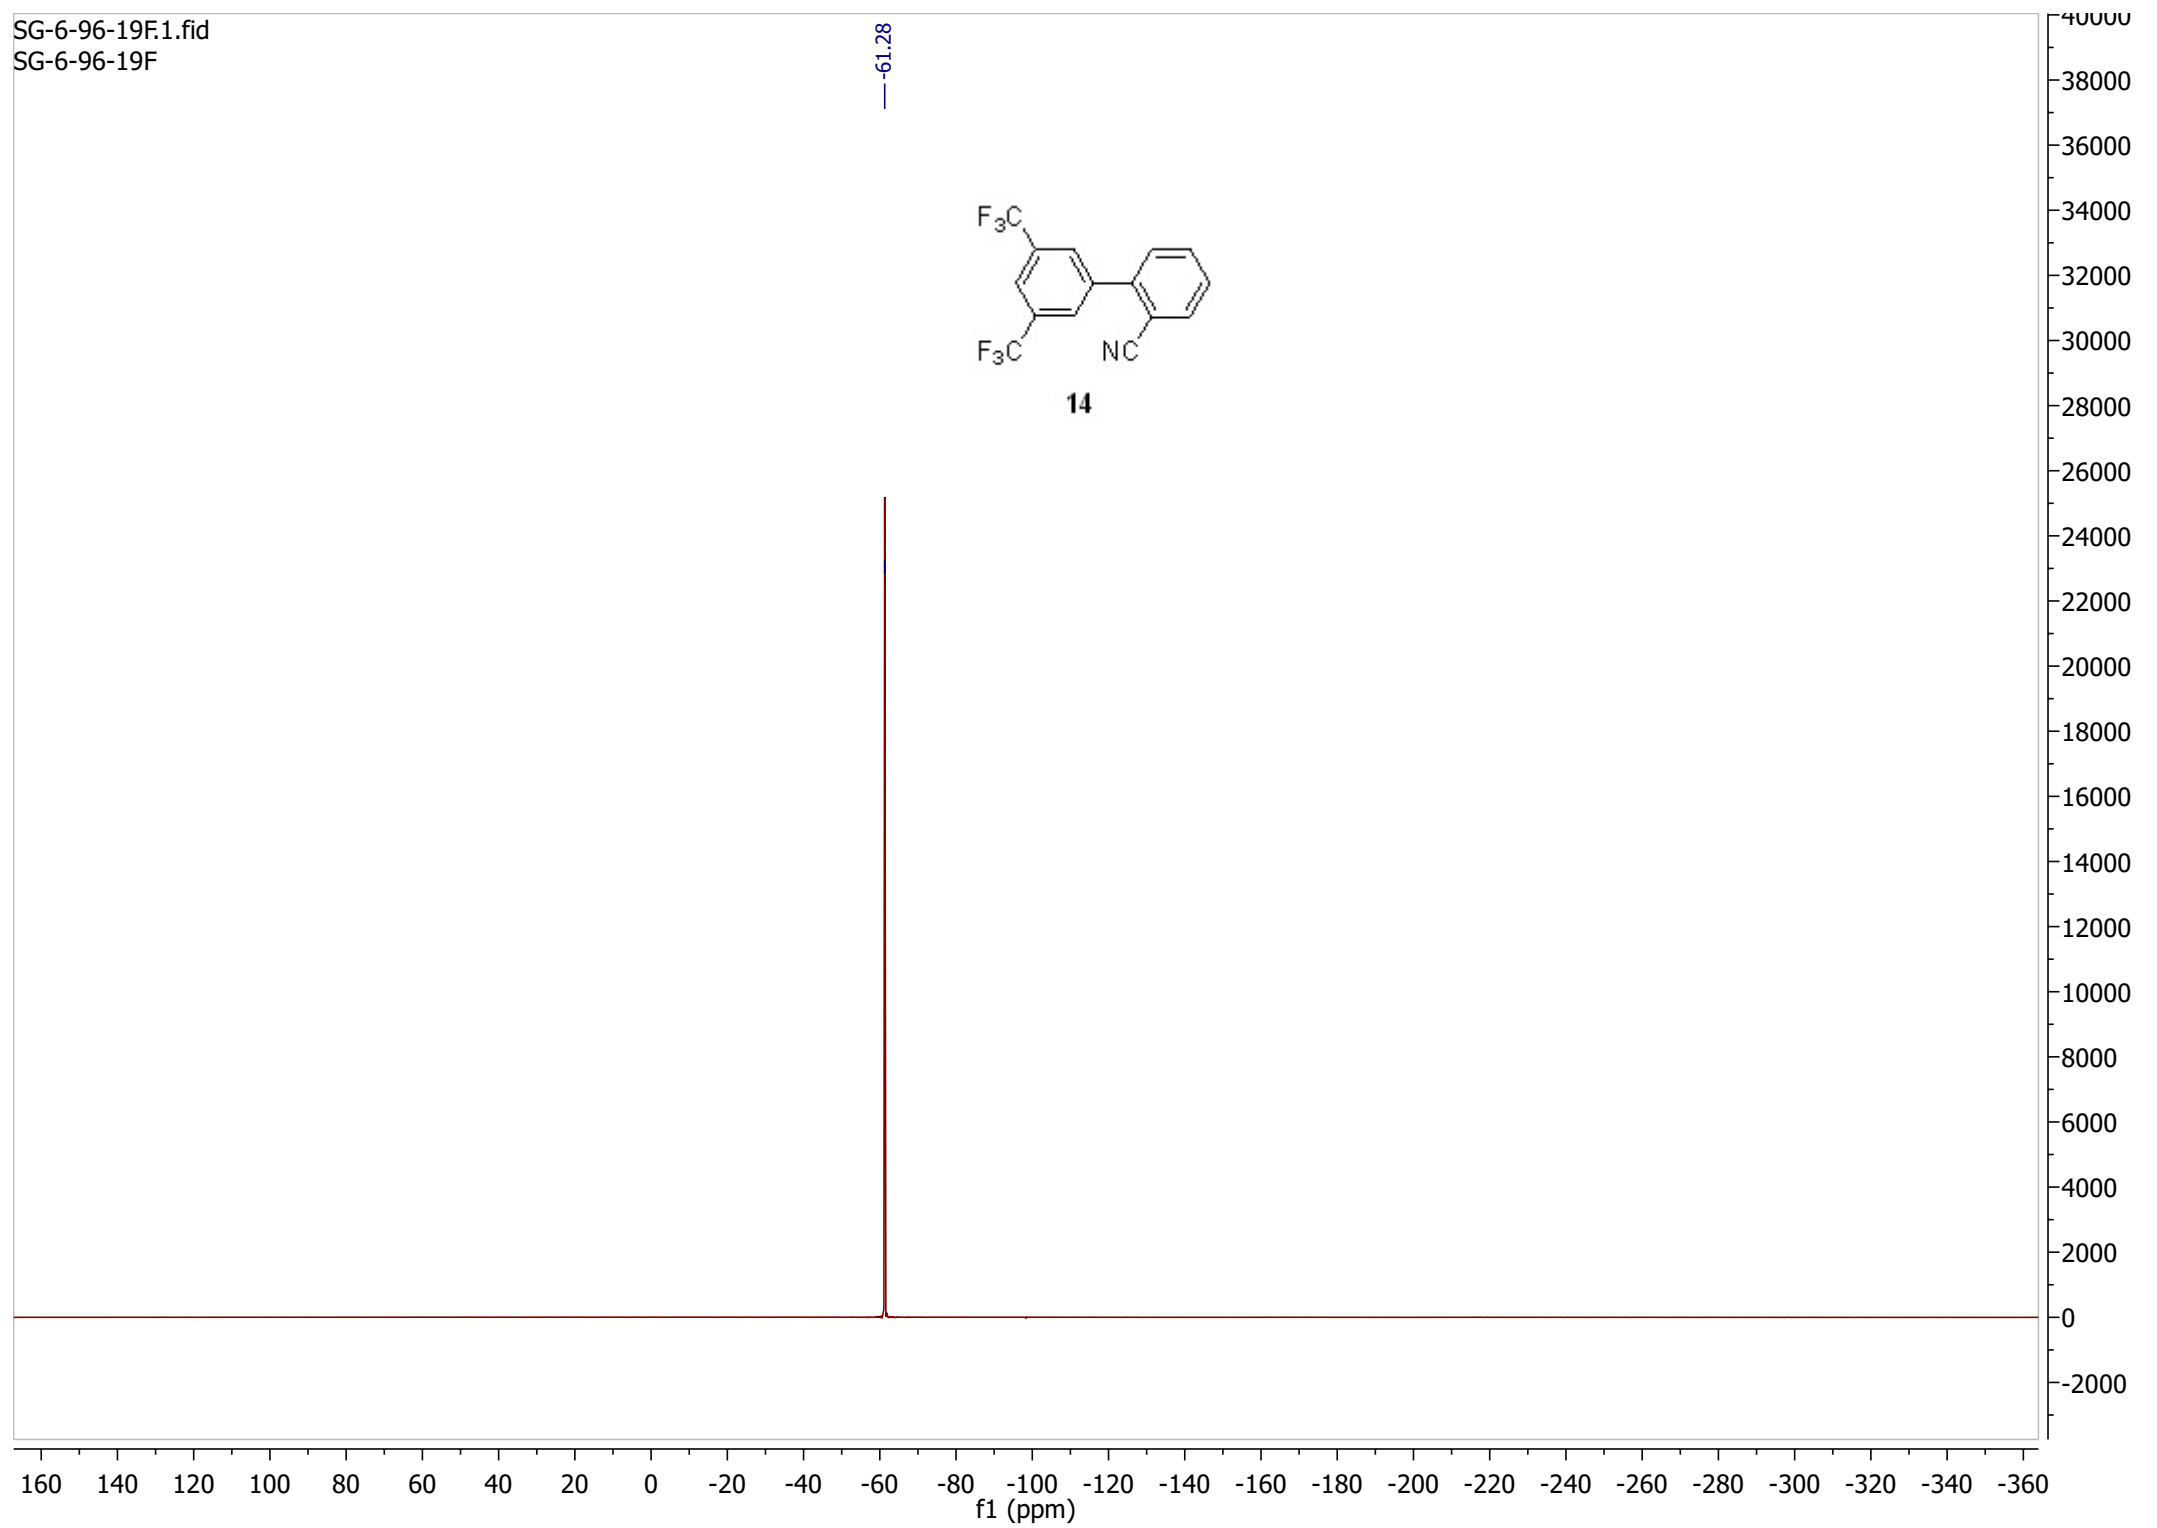



SG-6-69-1.1.fid  
SG-6-69-1

7.776 7.776 7.775 7.773 7.773 7.773 7.765 7.764 7.762 7.762 7.761 7.759 7.759 7.759 7.754 7.753 7.752 7.752 7.751 7.750 7.750 7.750 7.750 7.749 7.748 7.748 7.748 7.747 7.742 7.742 7.740 7.739 7.737 7.737 7.726 7.704 7.703 7.703 7.701 7.701 7.00 3.87

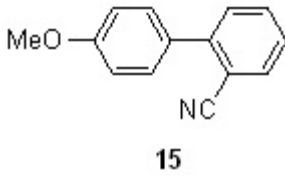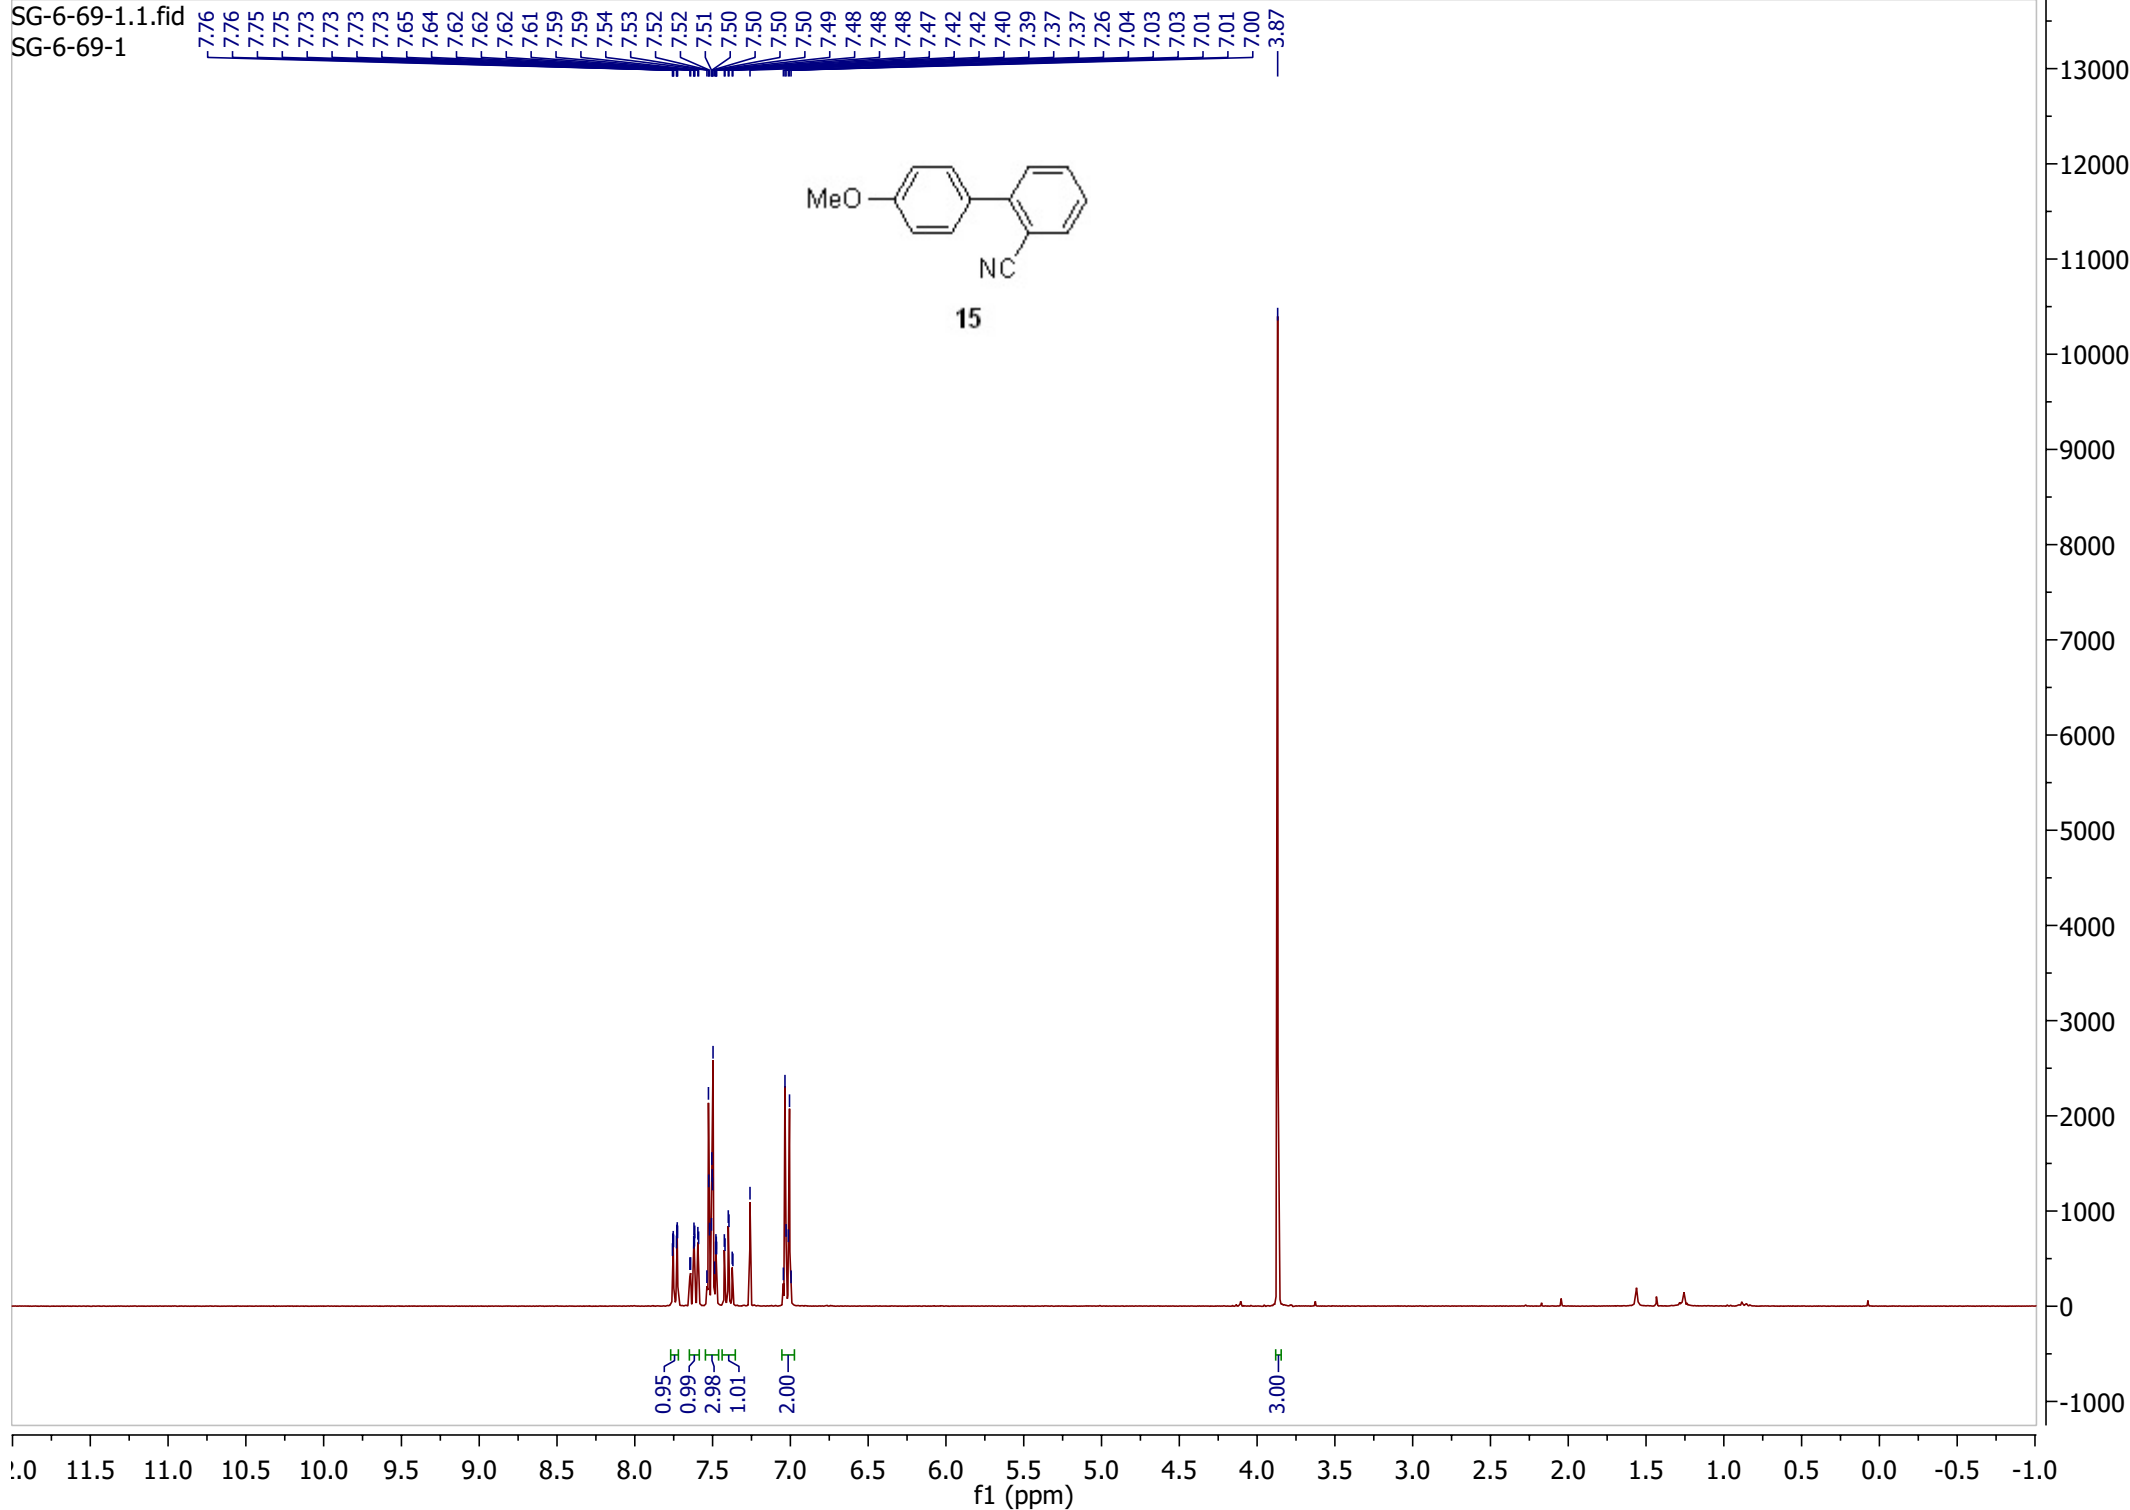

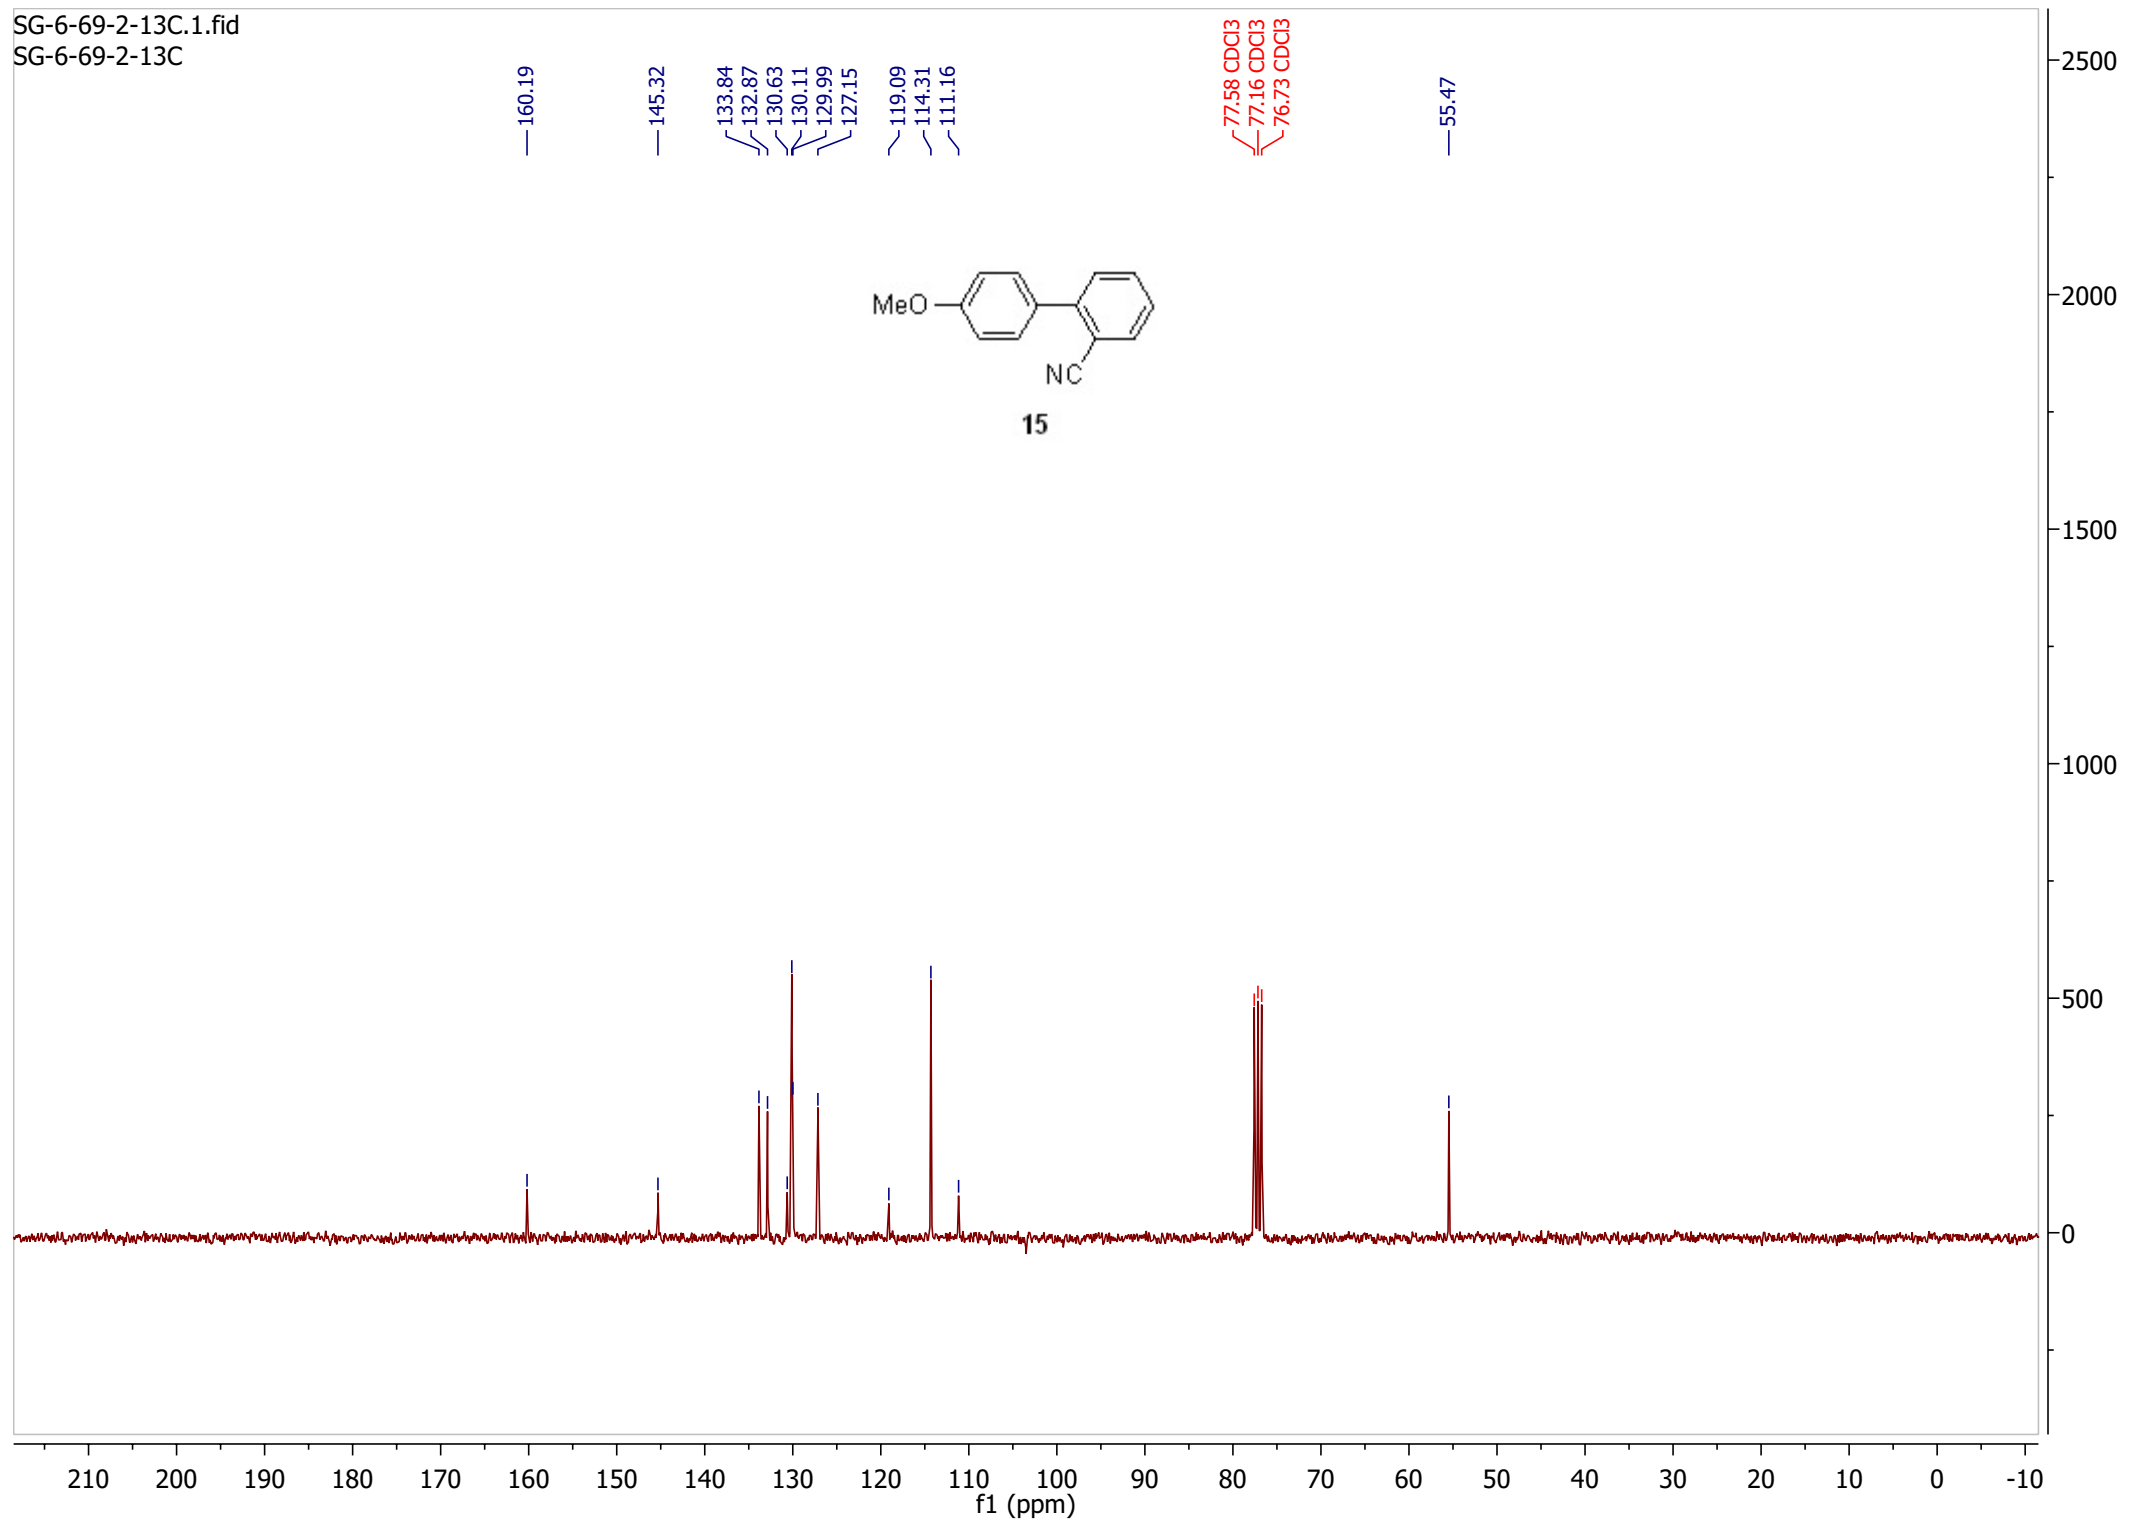

SG-6-79-Protom  
SG-6-79-Protom

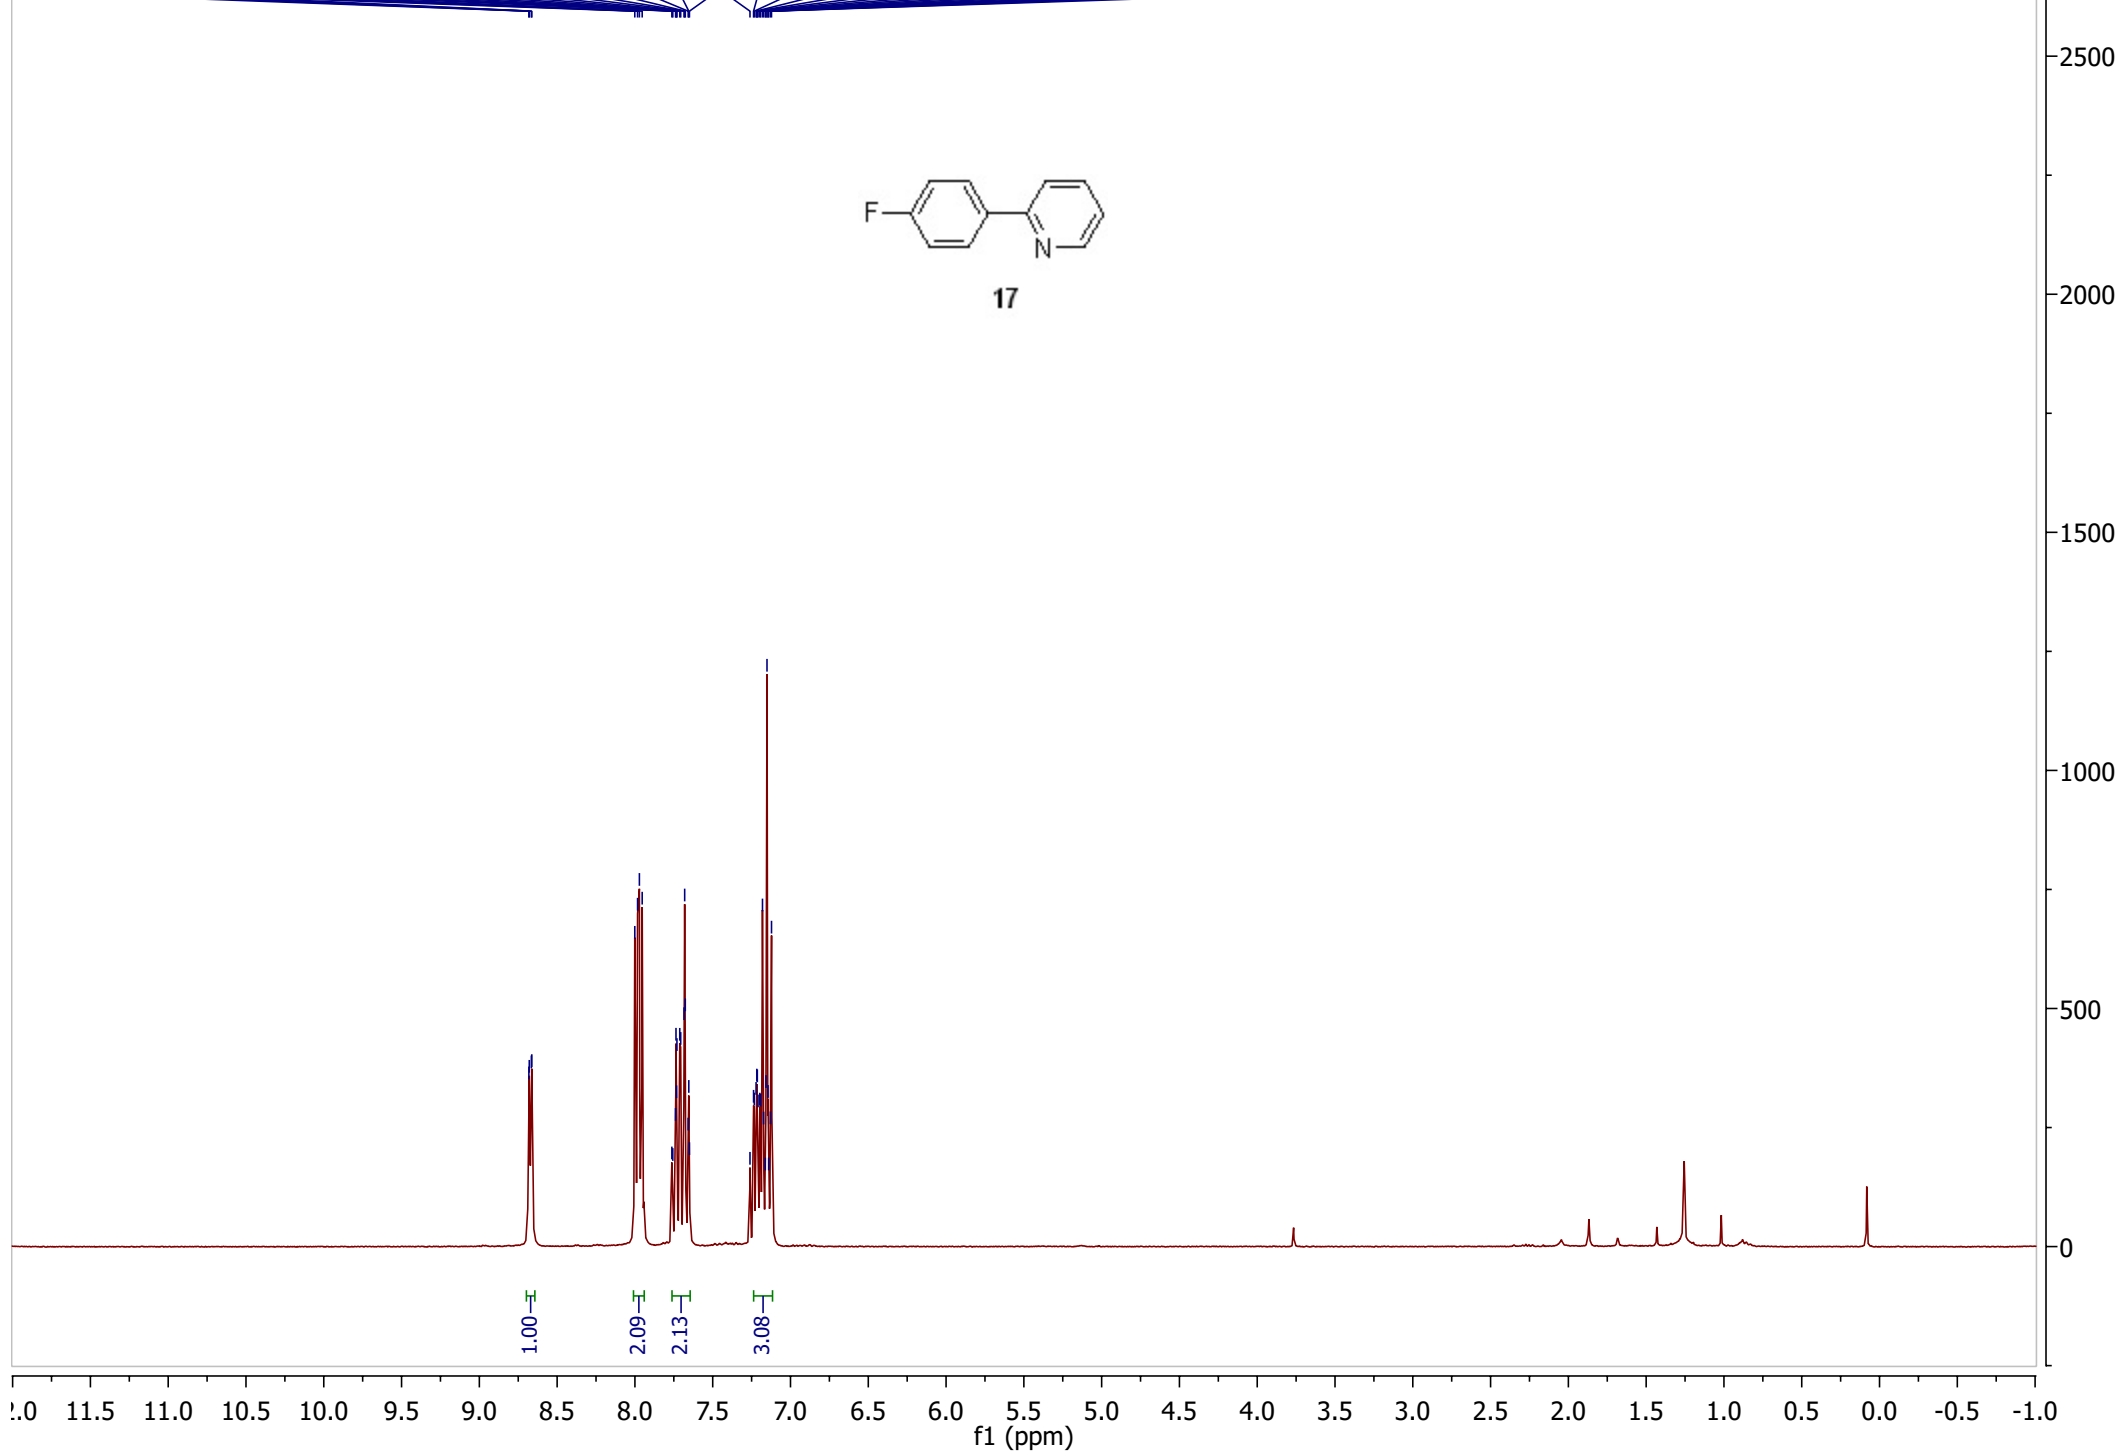

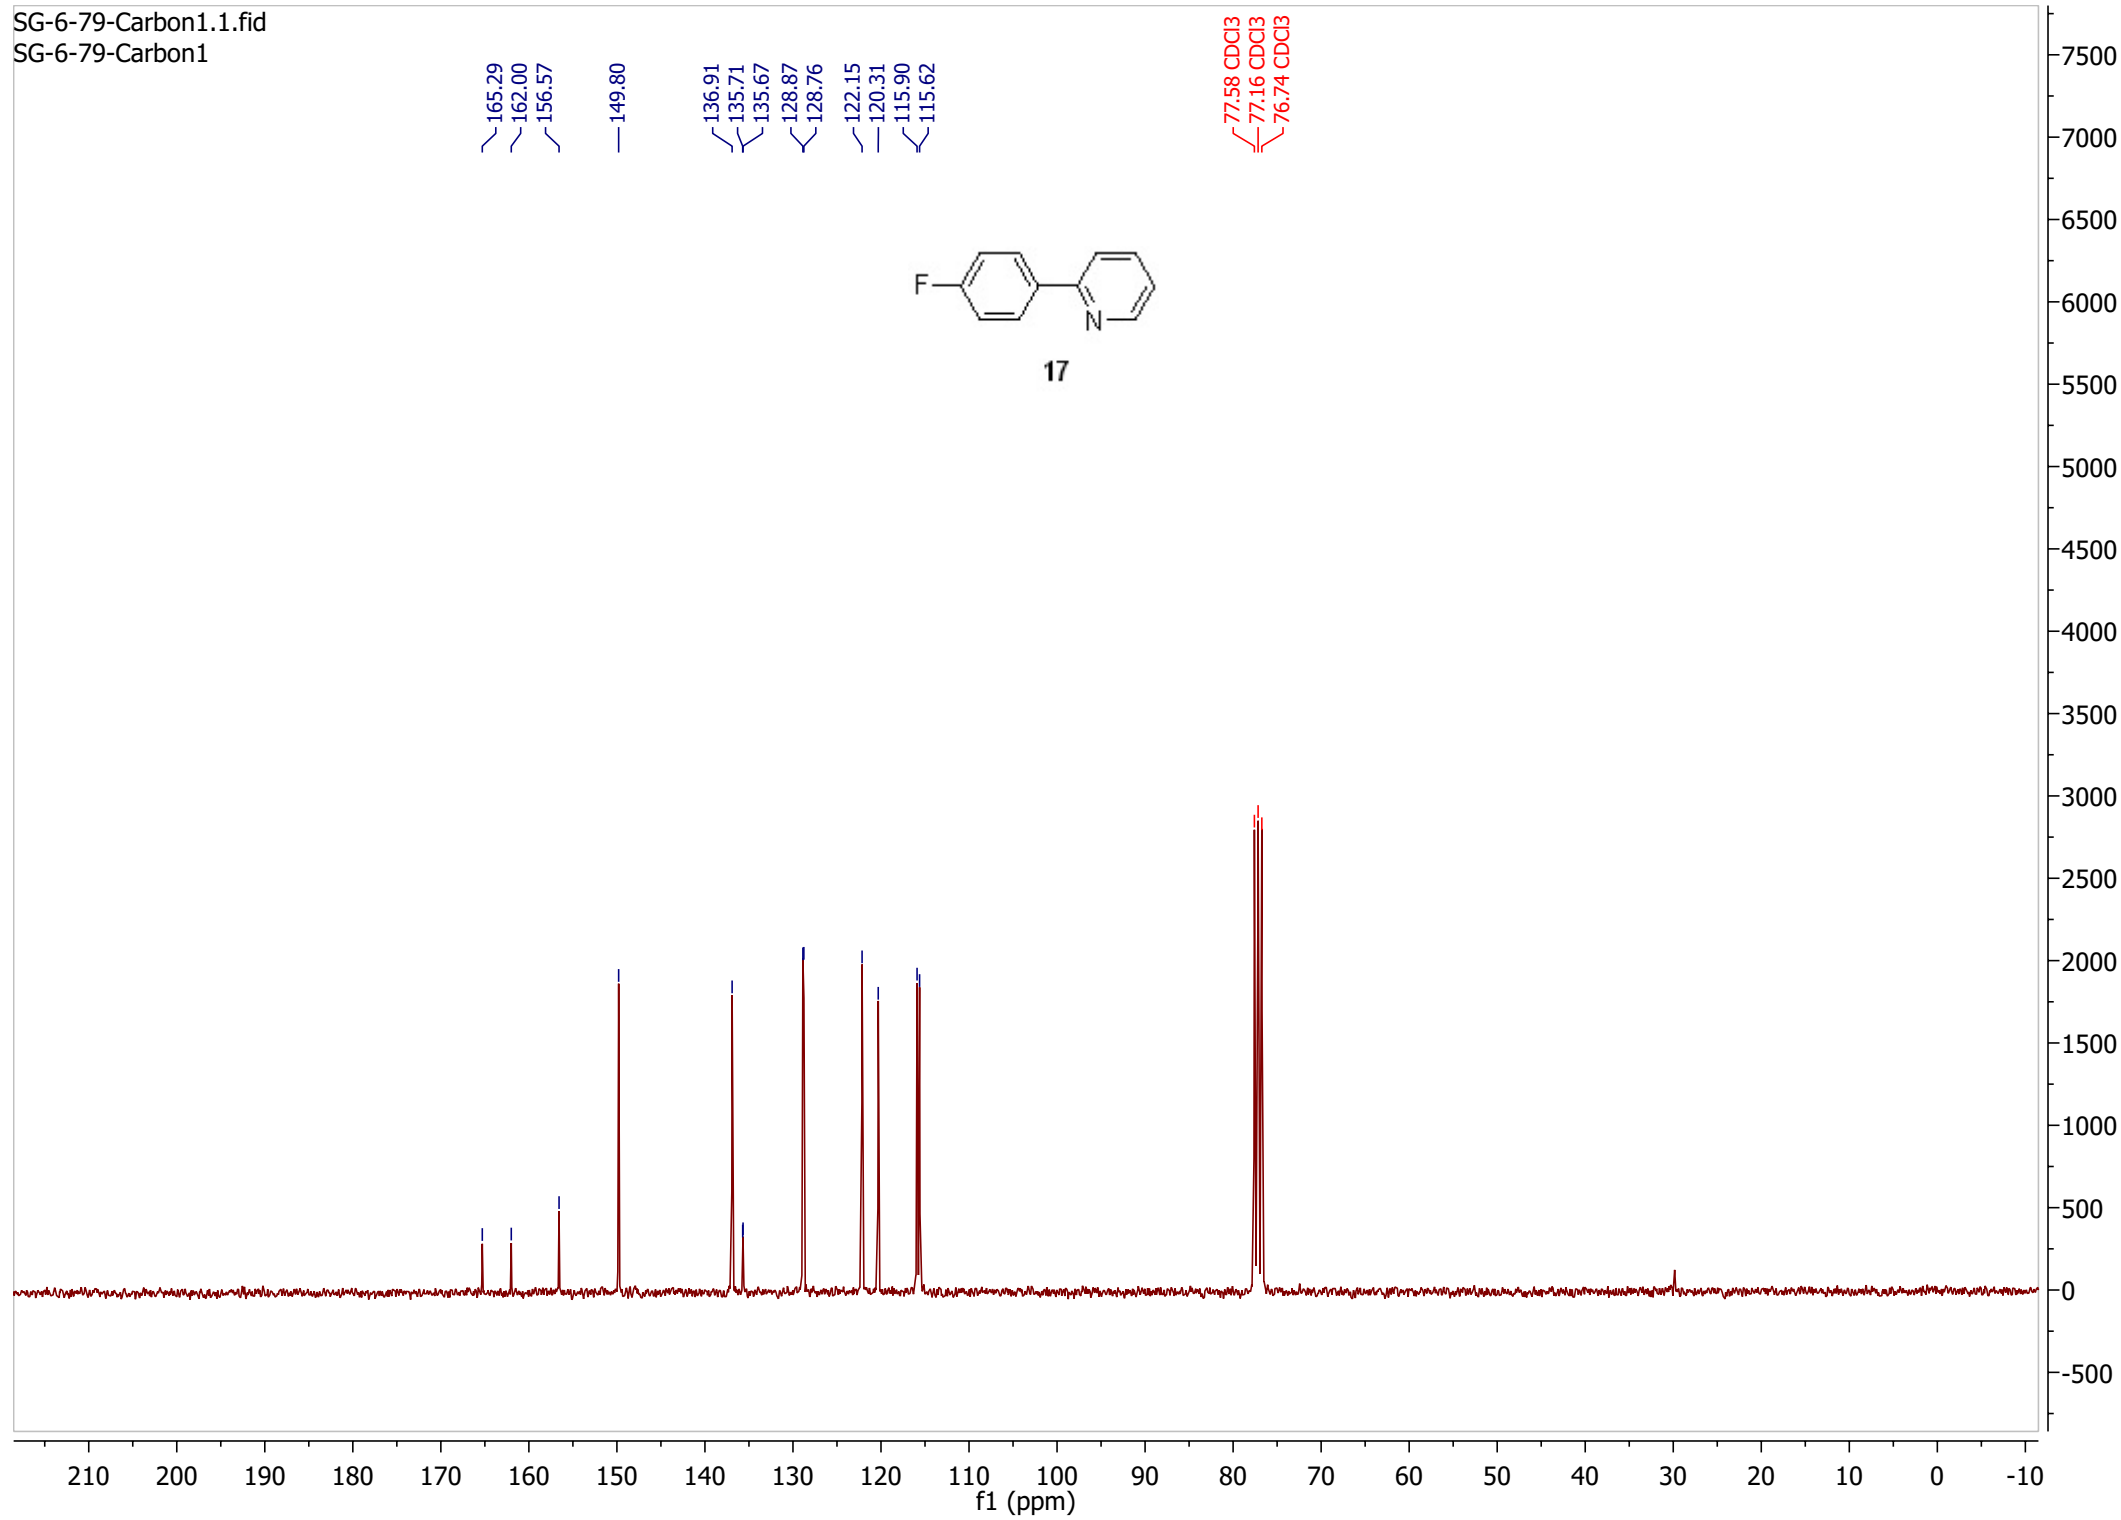

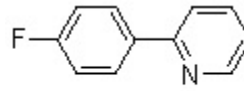

17

-111.56

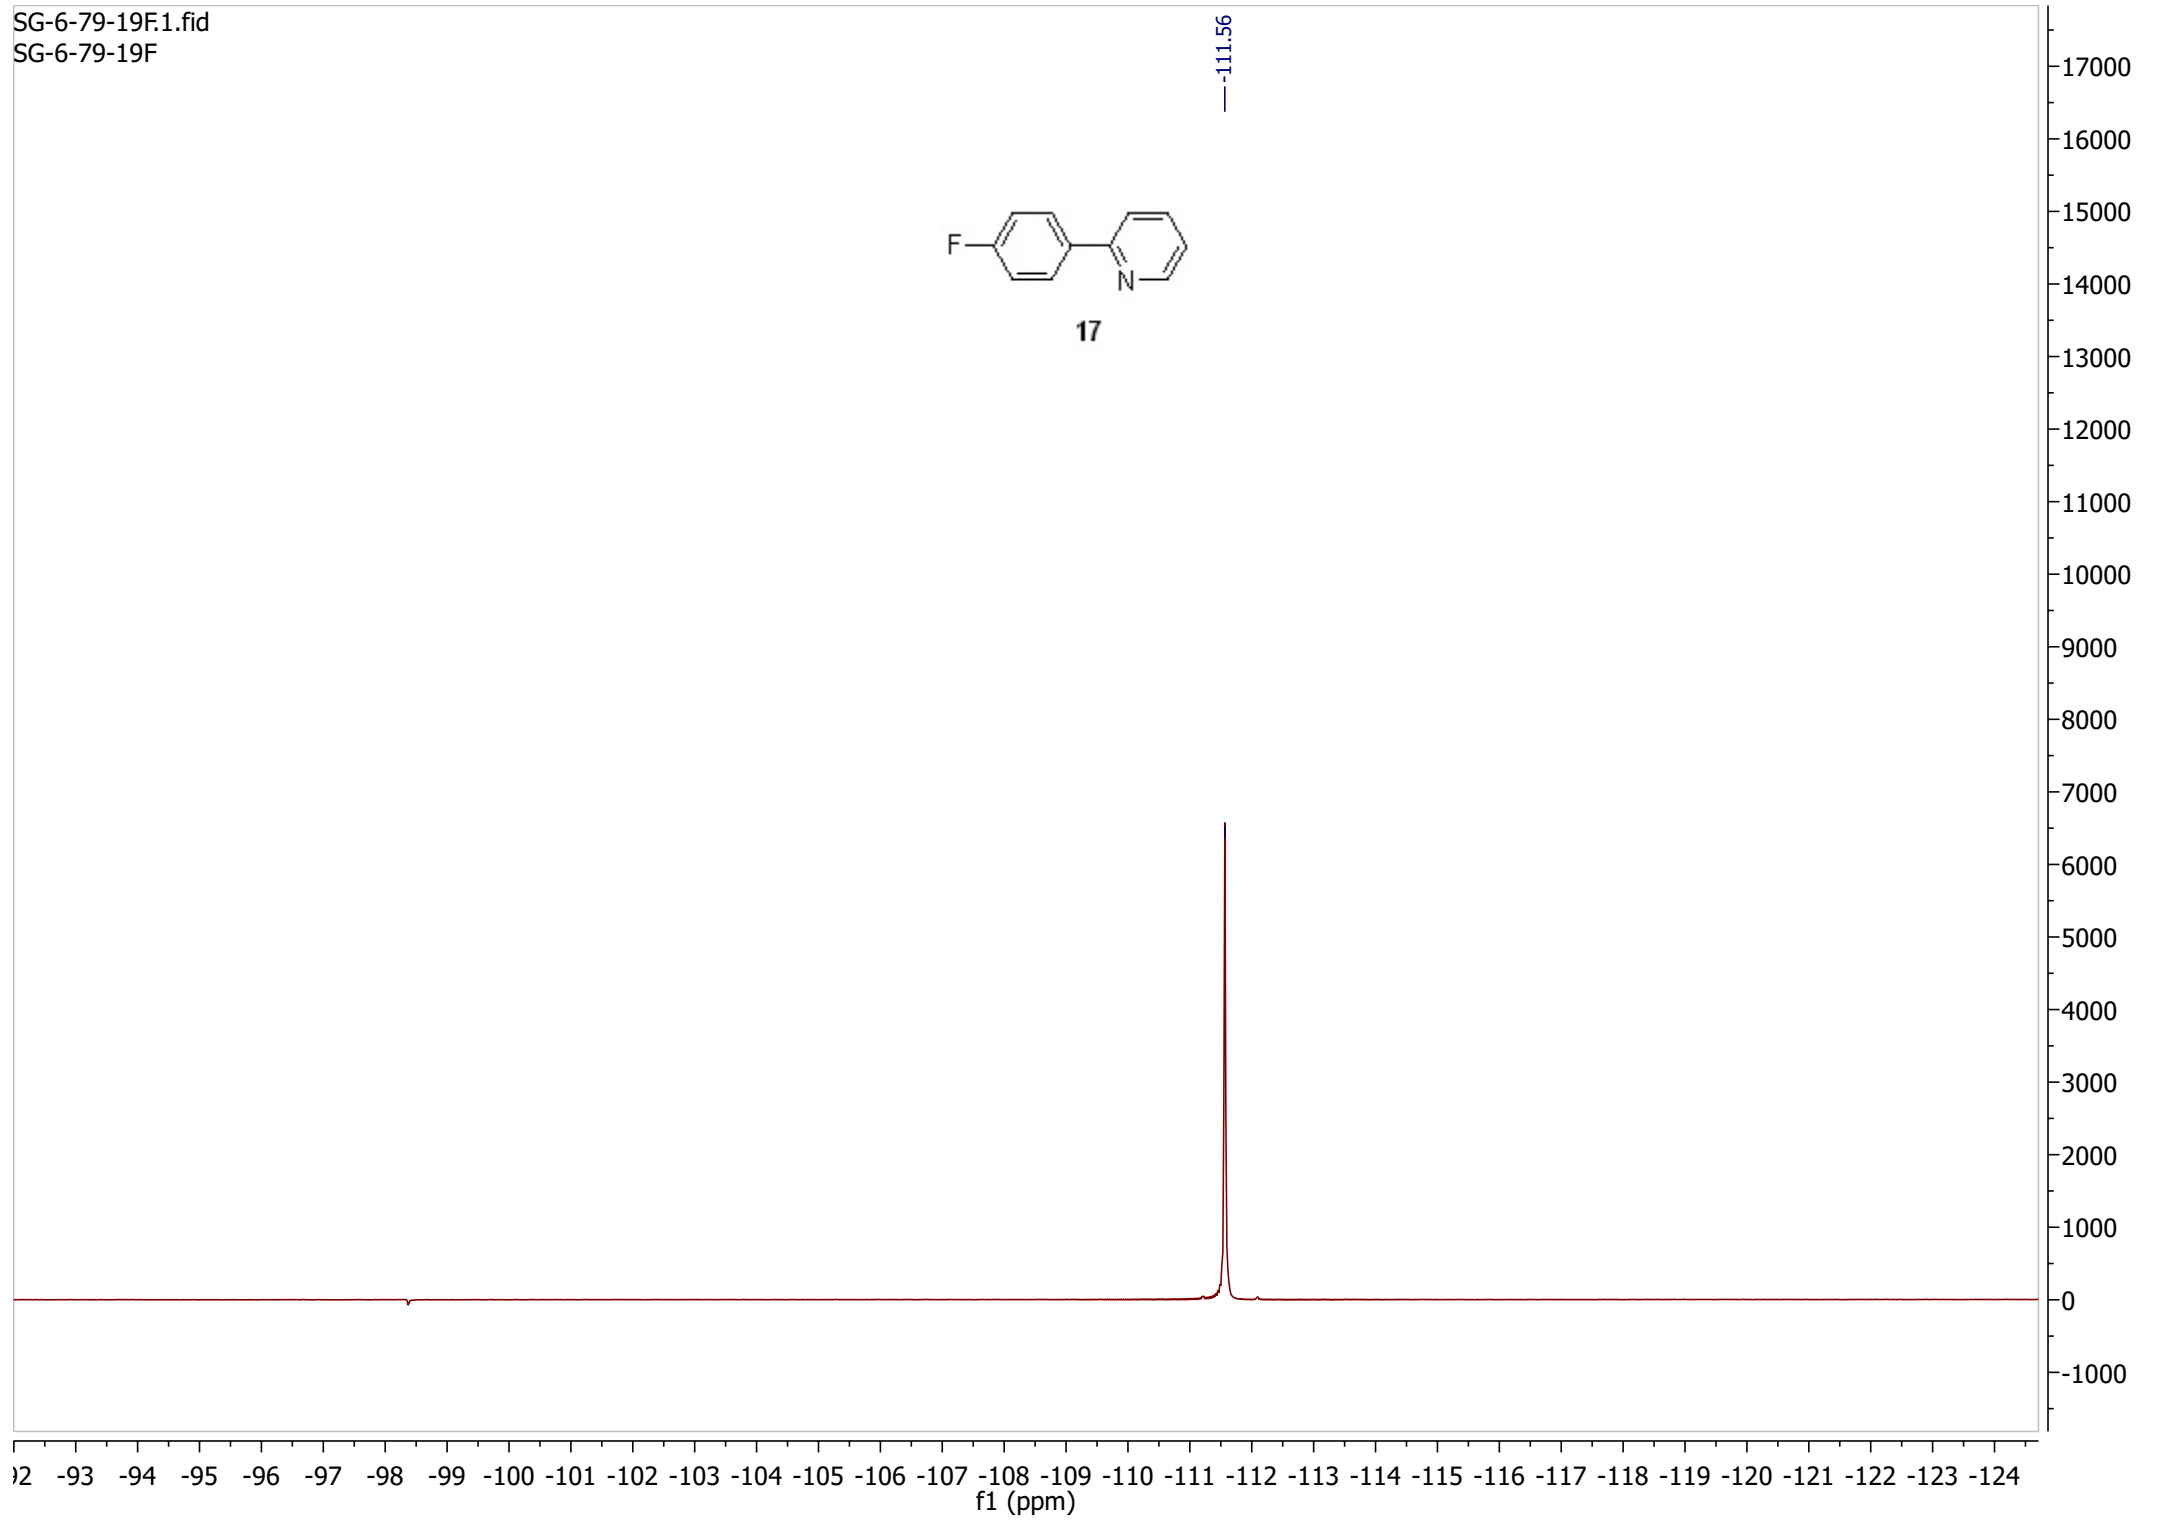

SG-6-64-re35.1.fid  
SG-6-64-re35

8.69  
8.69  
8.69  
8.68  
8.67  
8.67  
7.92  
7.91  
7.91  
7.89  
7.89  
7.88  
7.77  
7.77  
7.77  
7.71  
7.71  
7.70  
7.30  
7.30  
7.30  
7.29  
7.28  
7.27  
7.27  
7.27  
7.27  
7.26  
7.22  
7.21  
7.20  
7.20  
7.19  
7.19  
7.18  
7.17

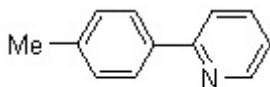

18

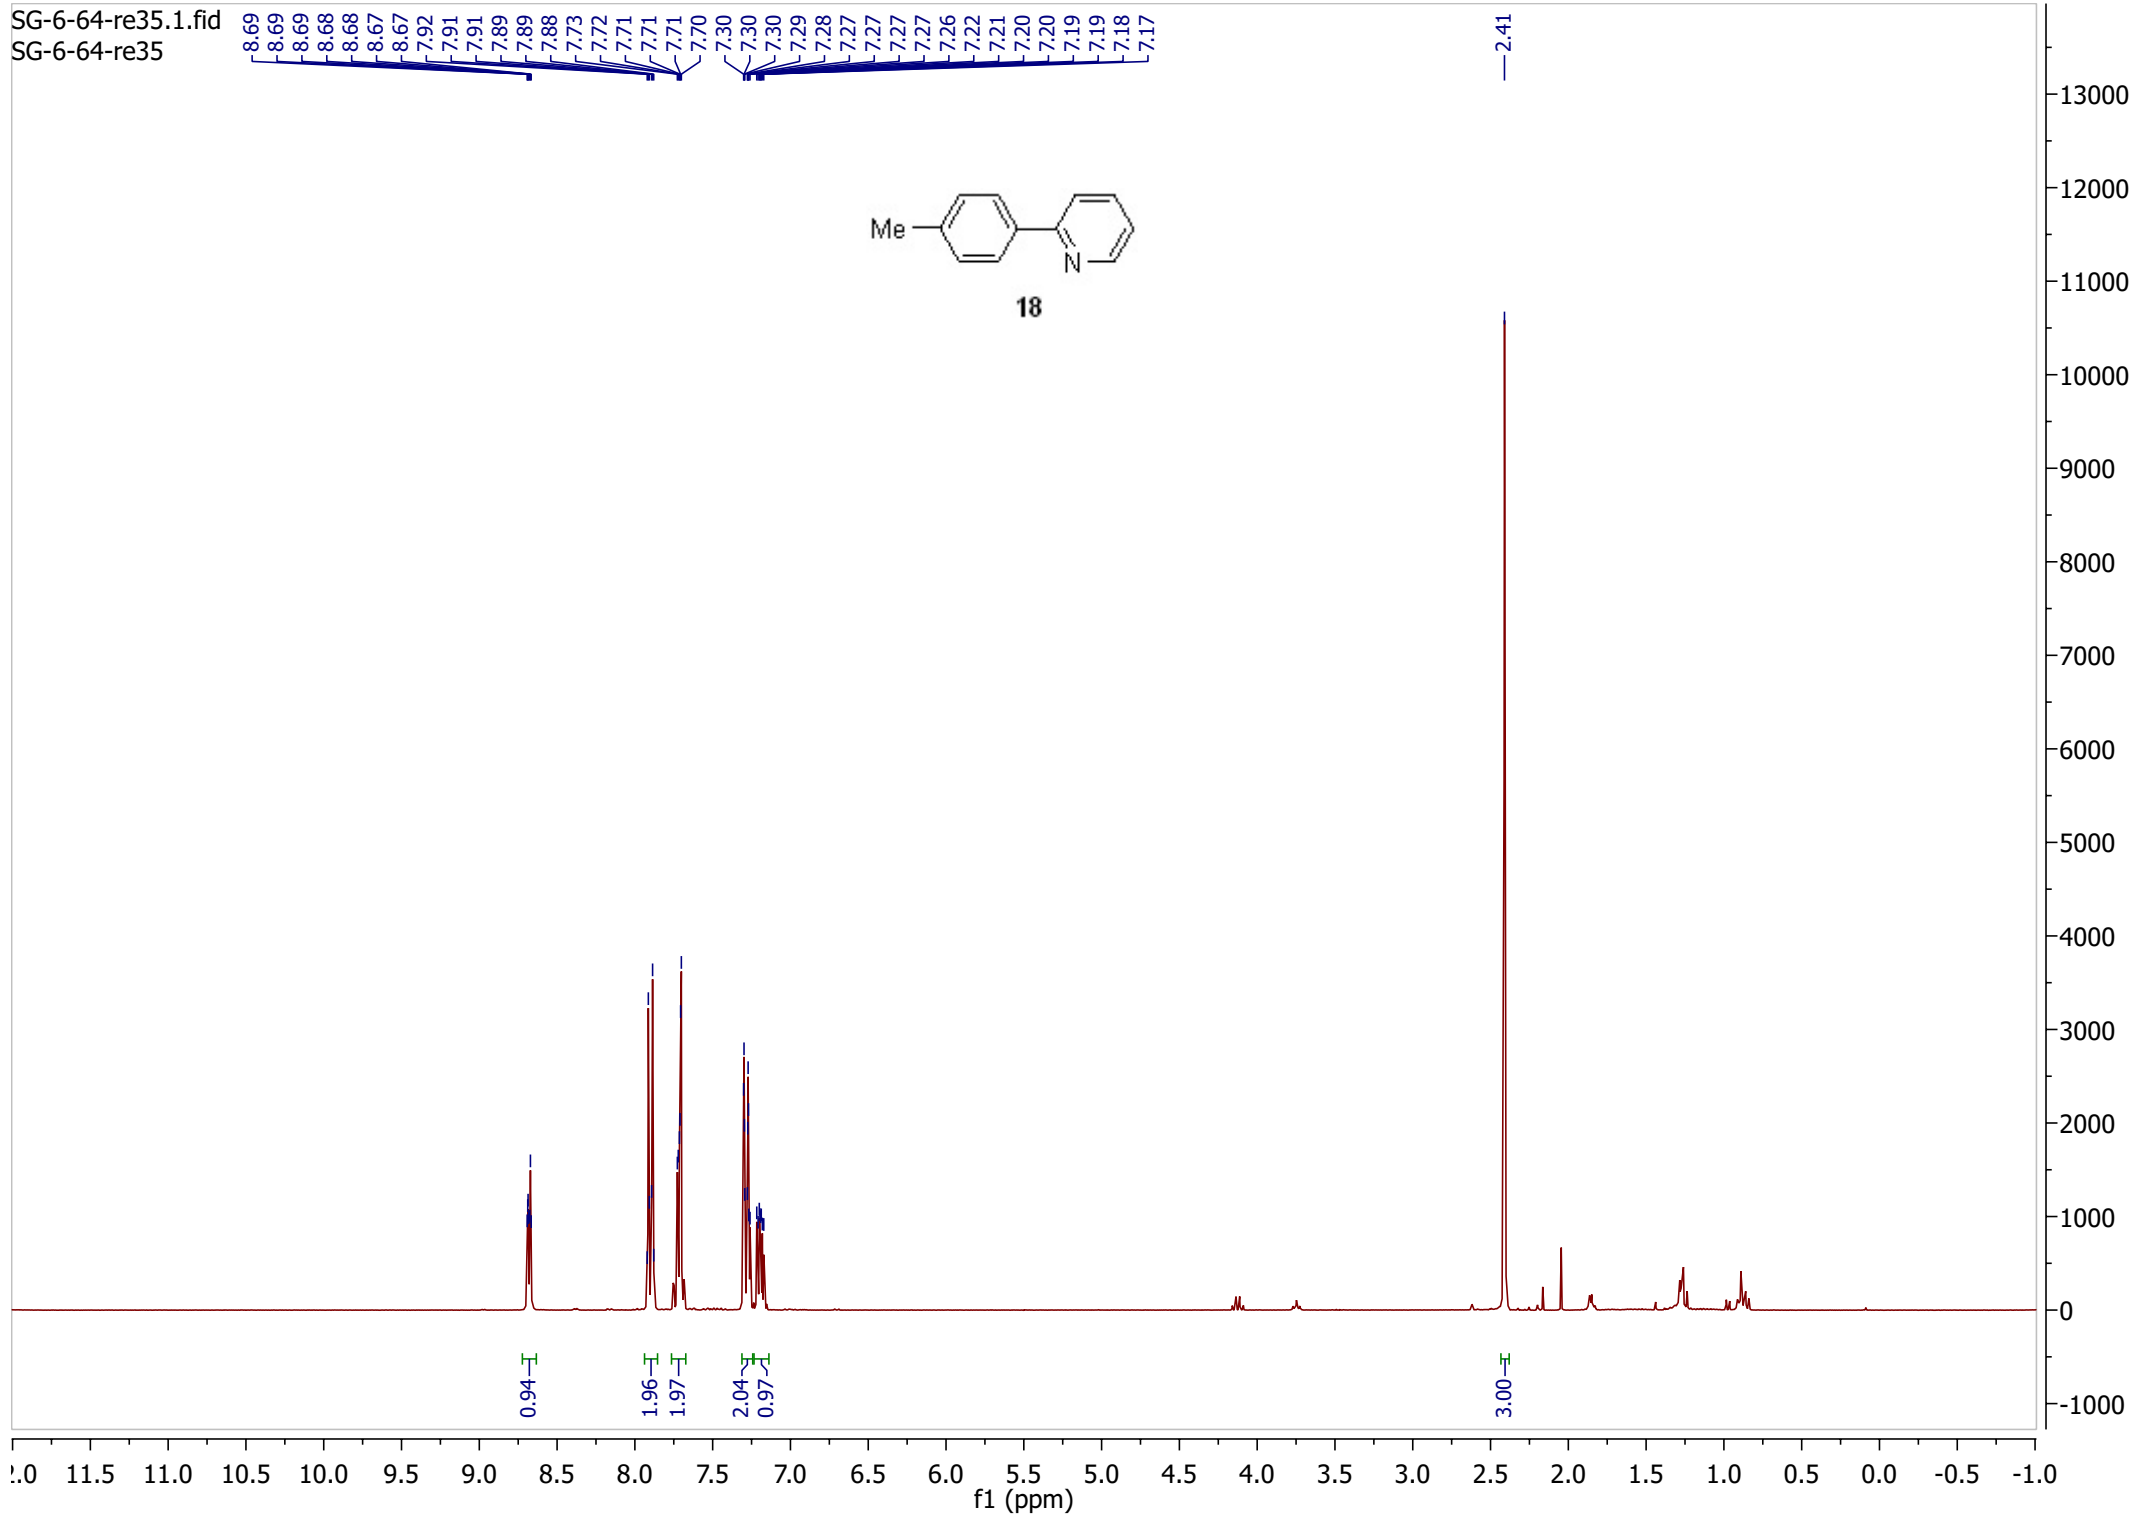

SG-6-64-13C.1.fid  
SG-6-64-13C

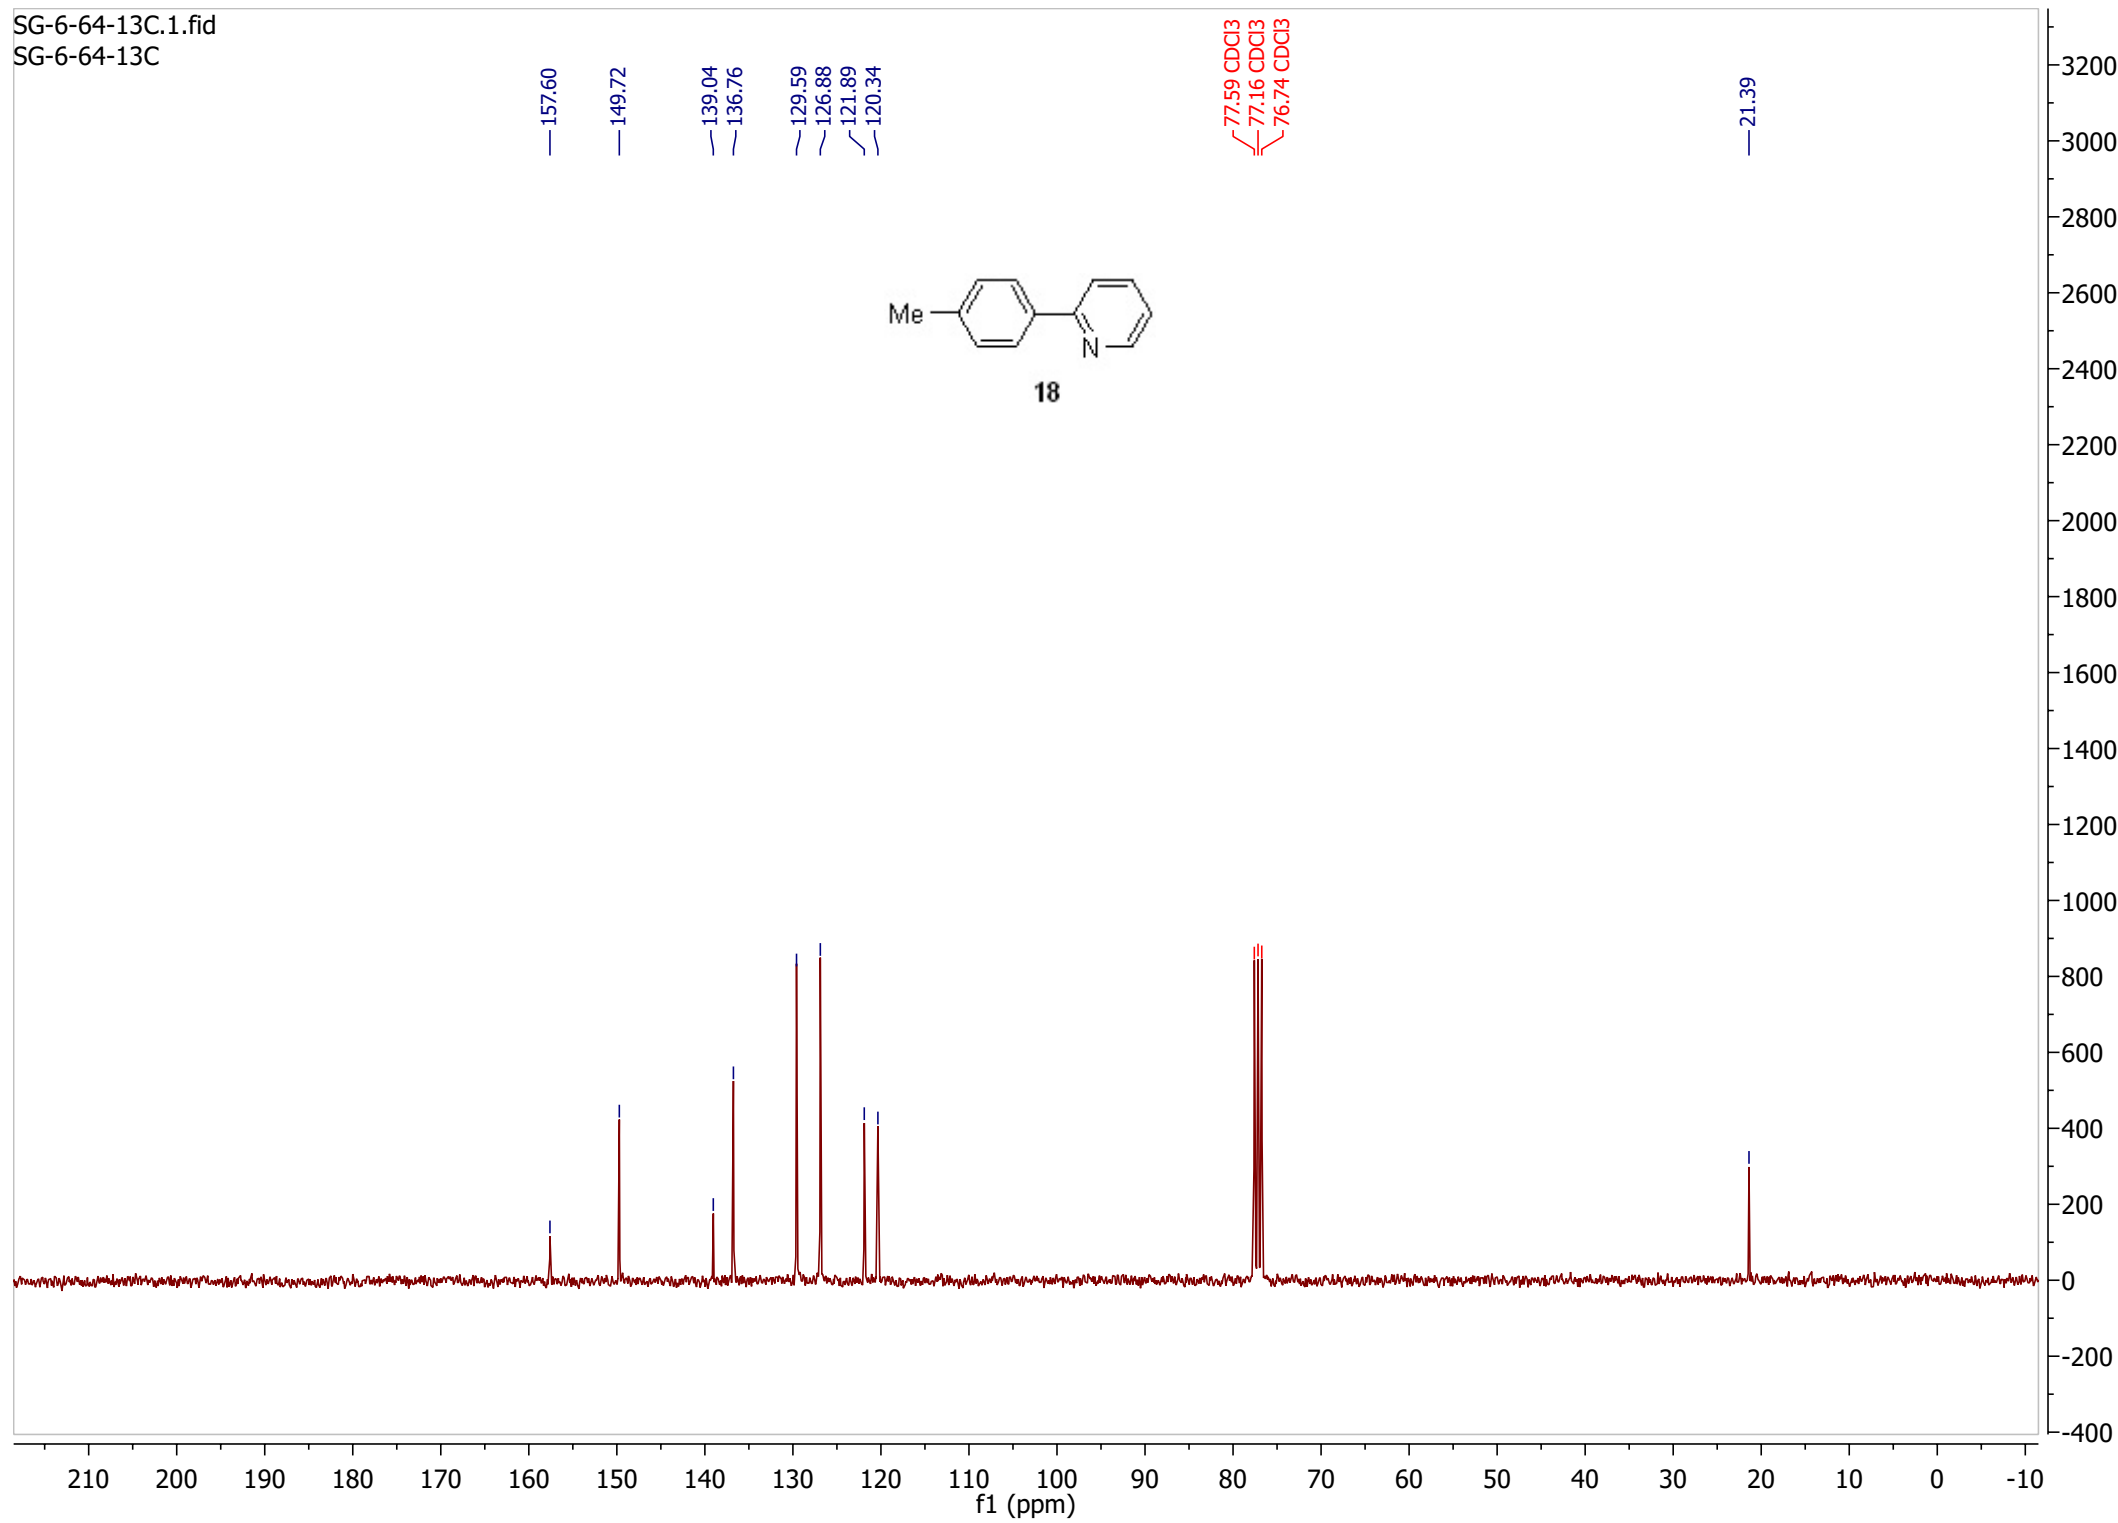

SG-6-75-1.1.fid  
SG-6-75-1

8.56  
8.56  
8.55  
8.55  
8.54  
8.54  
8.54  
7.93  
7.93  
7.93  
7.91  
7.91  
7.91  
7.61  
7.60  
7.60  
7.60  
7.59  
7.58  
7.57  
7.57  
7.56  
7.55  
7.54  
7.54  
7.51  
7.51  
7.49  
7.49  
7.48  
7.48  
7.33  
7.32  
7.32  
7.30  
7.30  
7.29  
7.28  
7.27  
7.27  
7.23  
7.23  
7.22  
7.21  
7.21  
7.20  
7.20  
7.19  
7.18  
7.18  
7.17  
7.17  
7.09  
7.09  
7.08  
7.07  
7.07  
7.07  
7.06  
7.05  
7.05

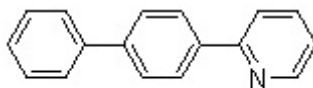

19

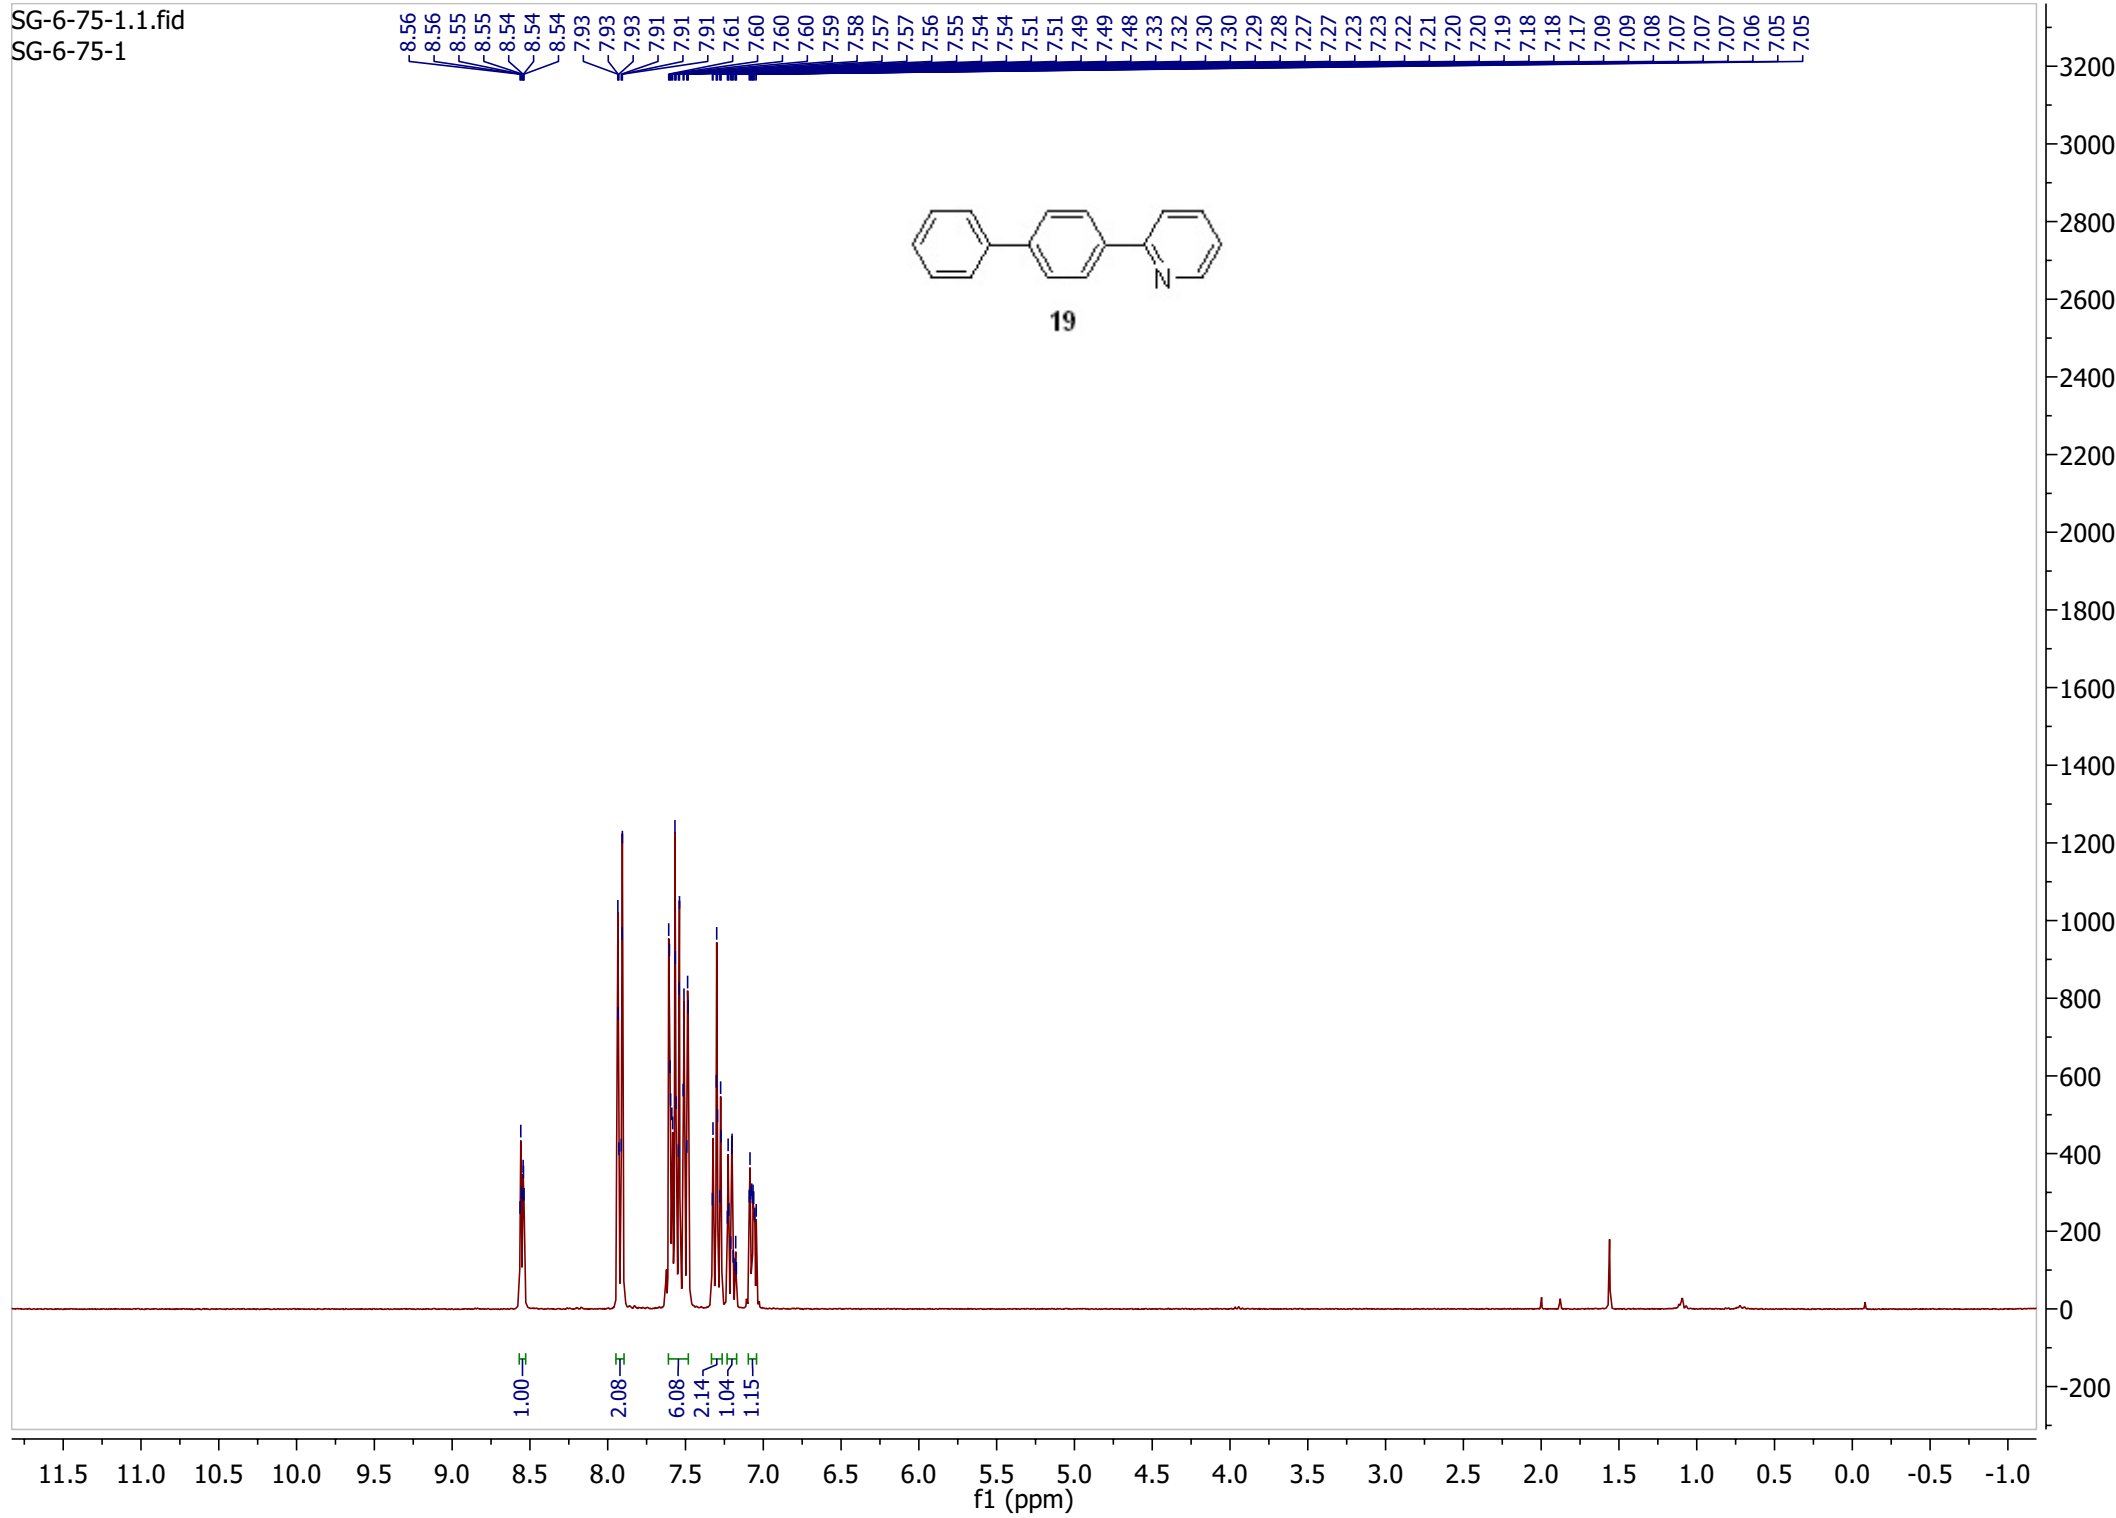



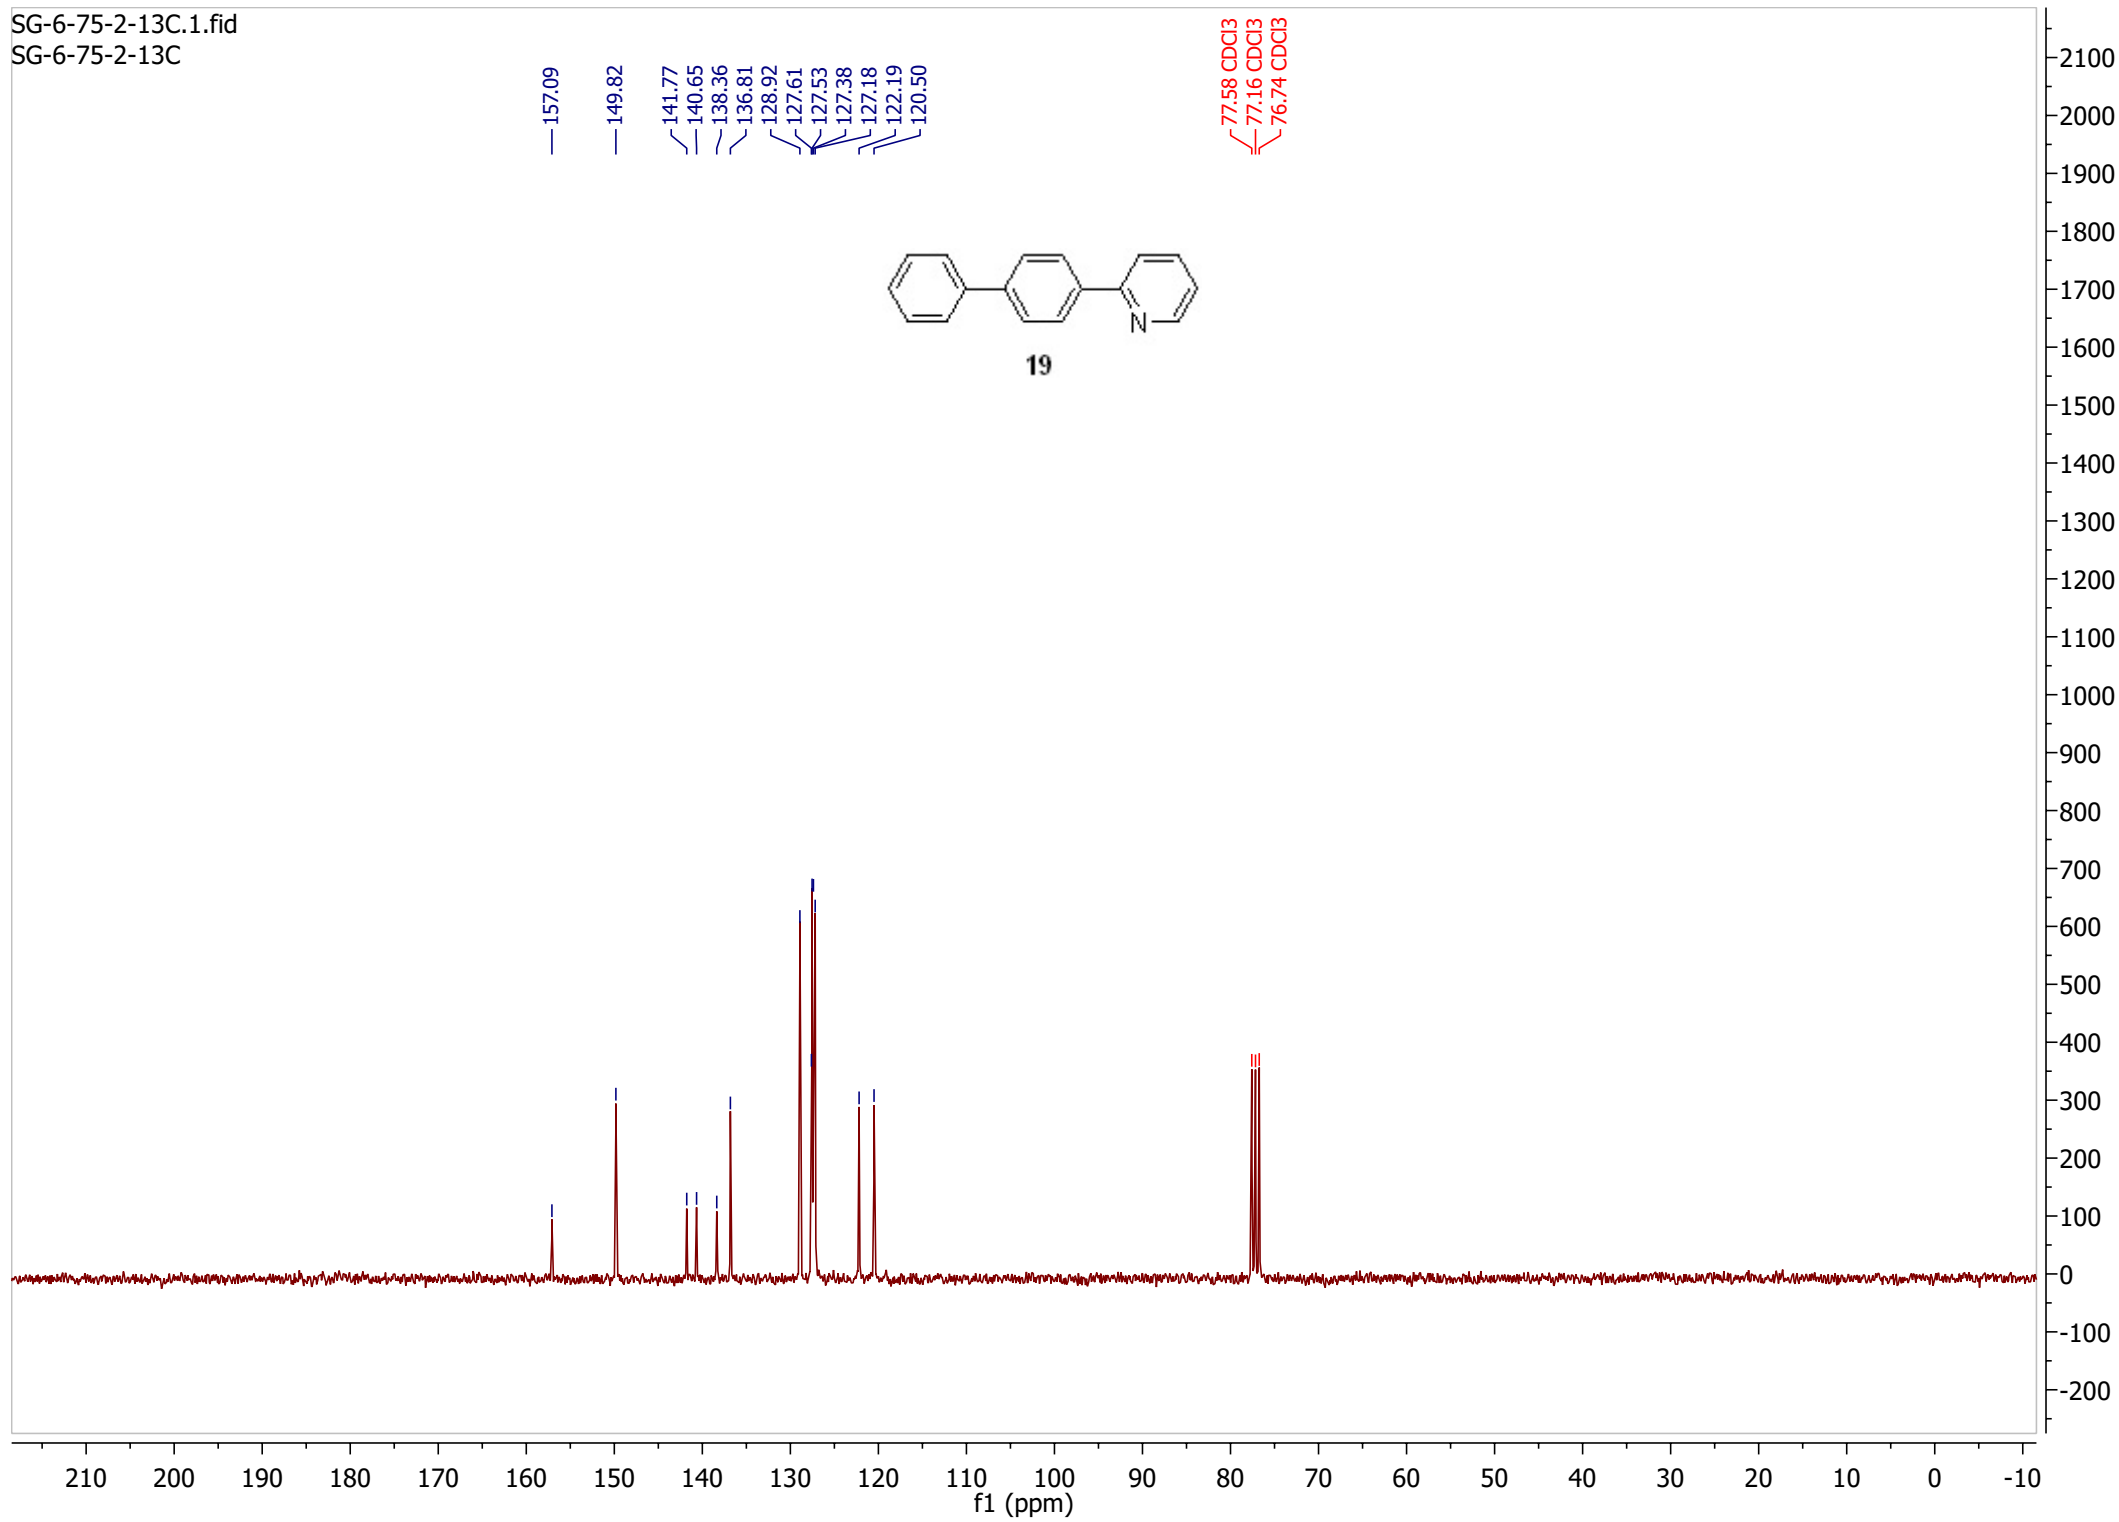

SG-6-92-80.1.fid  
SG-6-92-80

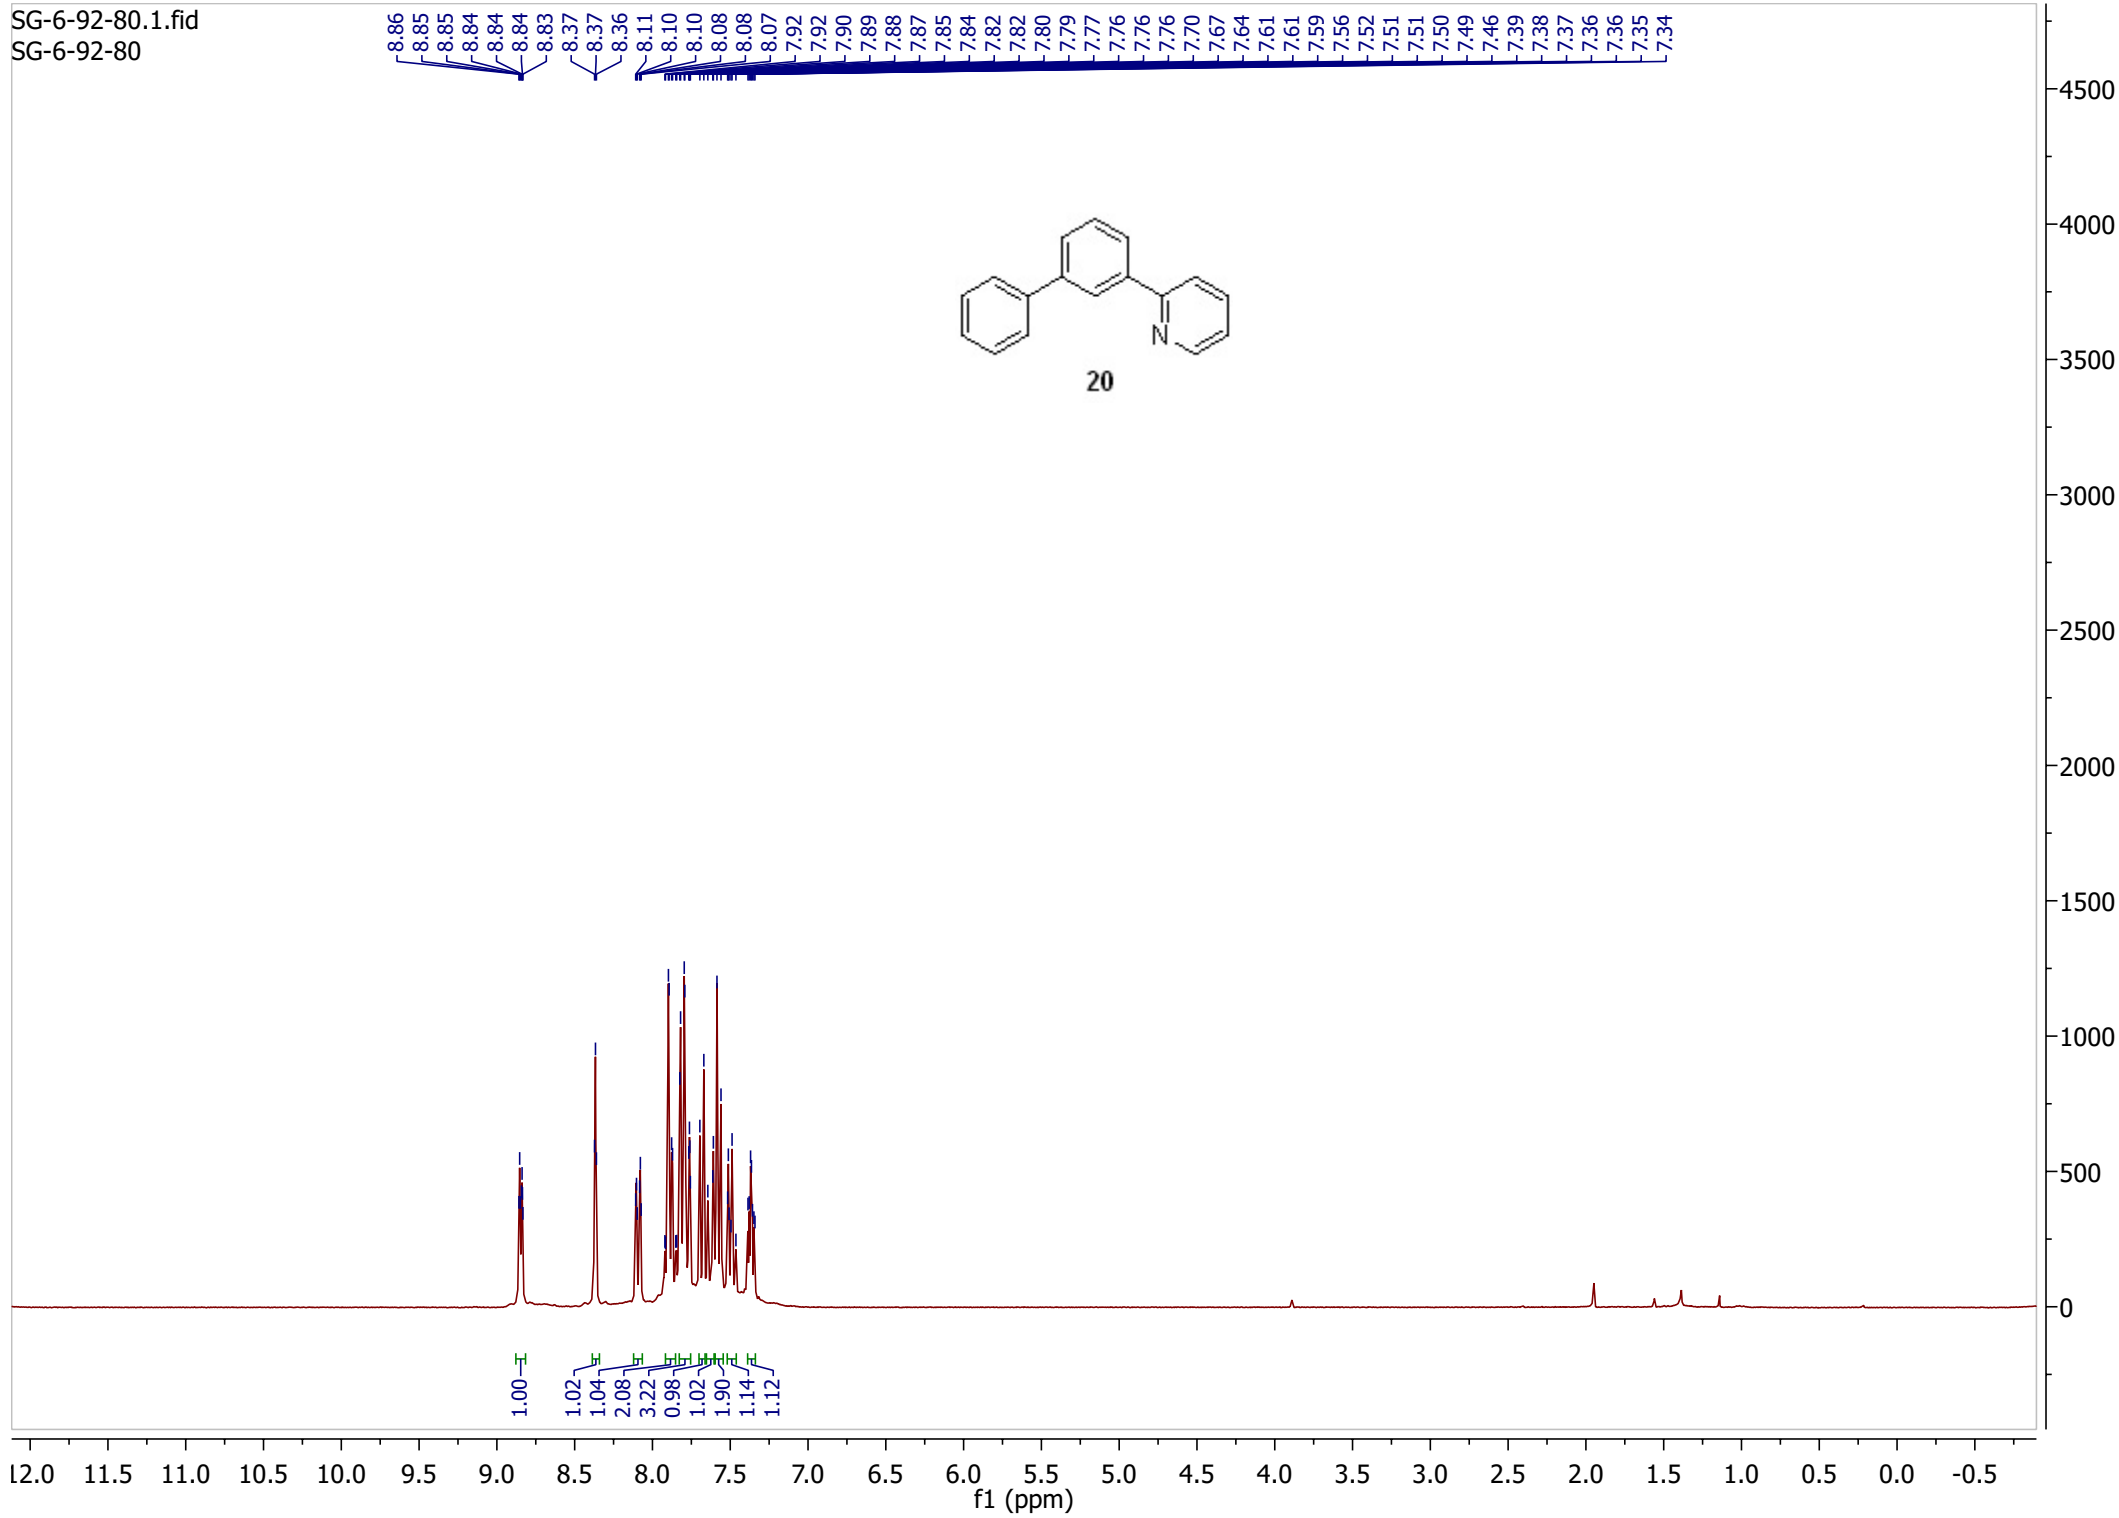

SG-6-92-80-13C.1.fid  
SG-6-92-80-13C

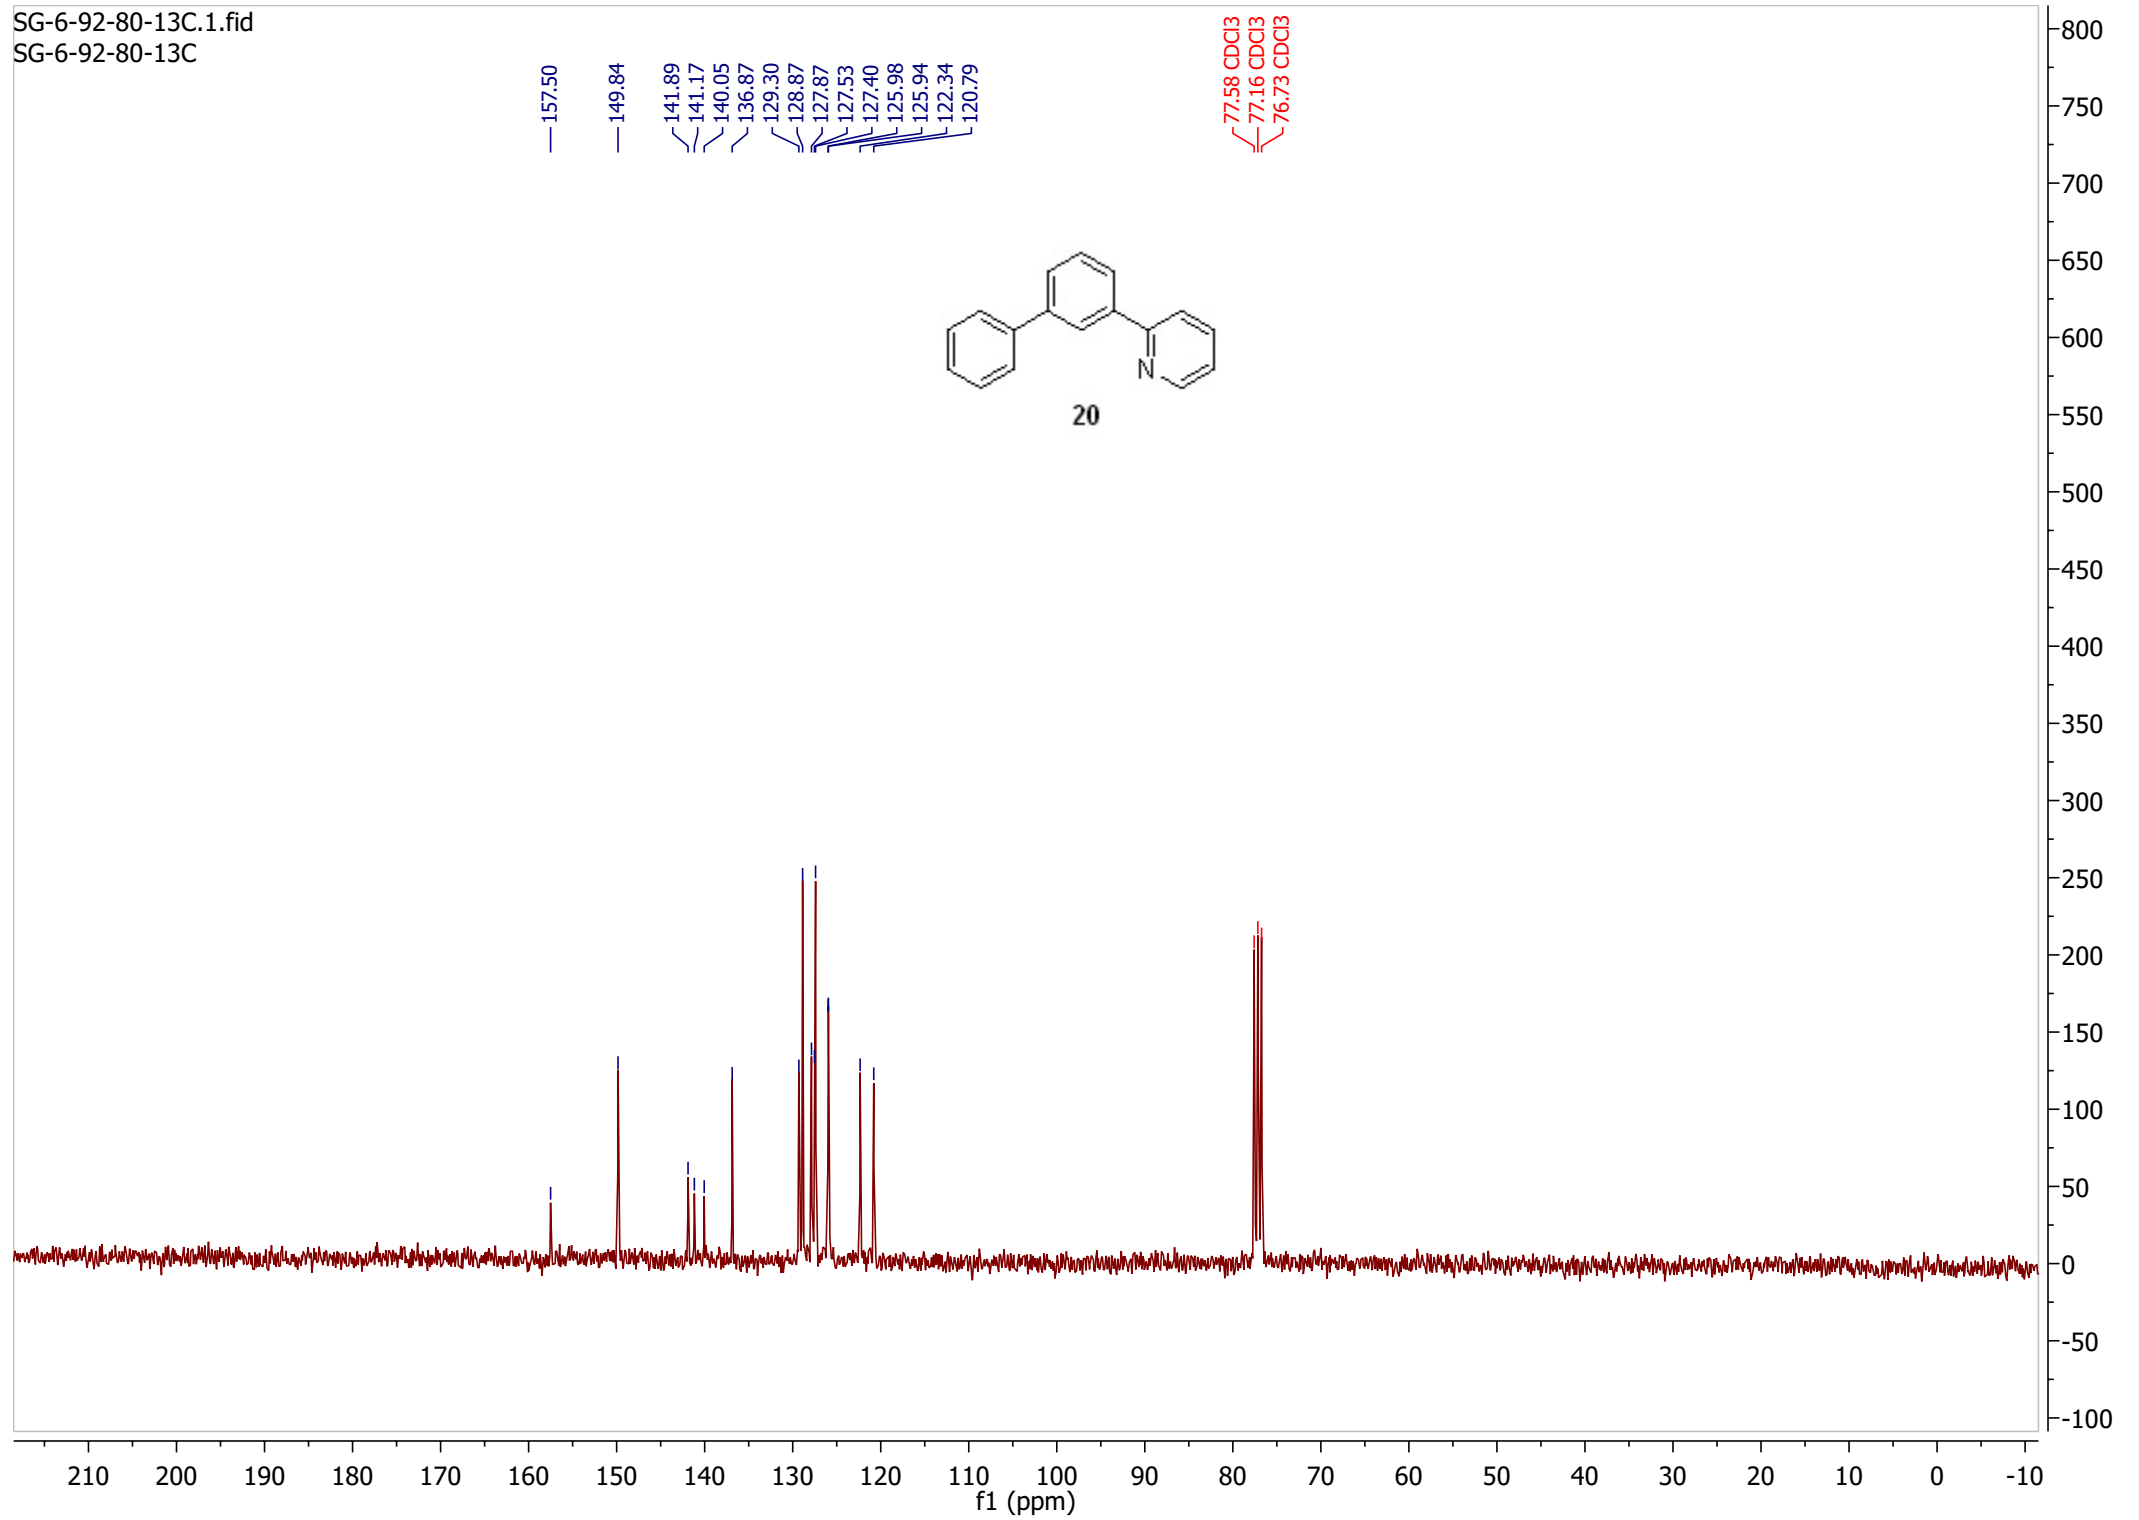

ST-4-228-1H.1.fid  
ST-4-228-1H

8.92  
8.91  
8.00  
7.26

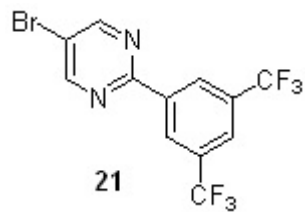

4.16  
1.00

12.0 11.5 11.0 10.5 10.0 9.5 9.0 8.5 8.0 7.5 7.0 6.5 6.0 5.5 5.0 4.5 4.0 3.5 3.0 2.5 2.0 1.5 1.0 0.5 0.0 -0.5 -1.0  
f1 (ppm)

2300  
2200  
2100  
2000  
1900  
1800  
1700  
1600  
1500  
1400  
1300  
1200  
1100  
1000  
900  
800  
700  
600  
500  
400  
300  
200  
100  
0  
-100  
-200

ST-4-228-13C-solid.3.fid  
ST-4-228-13C-solid

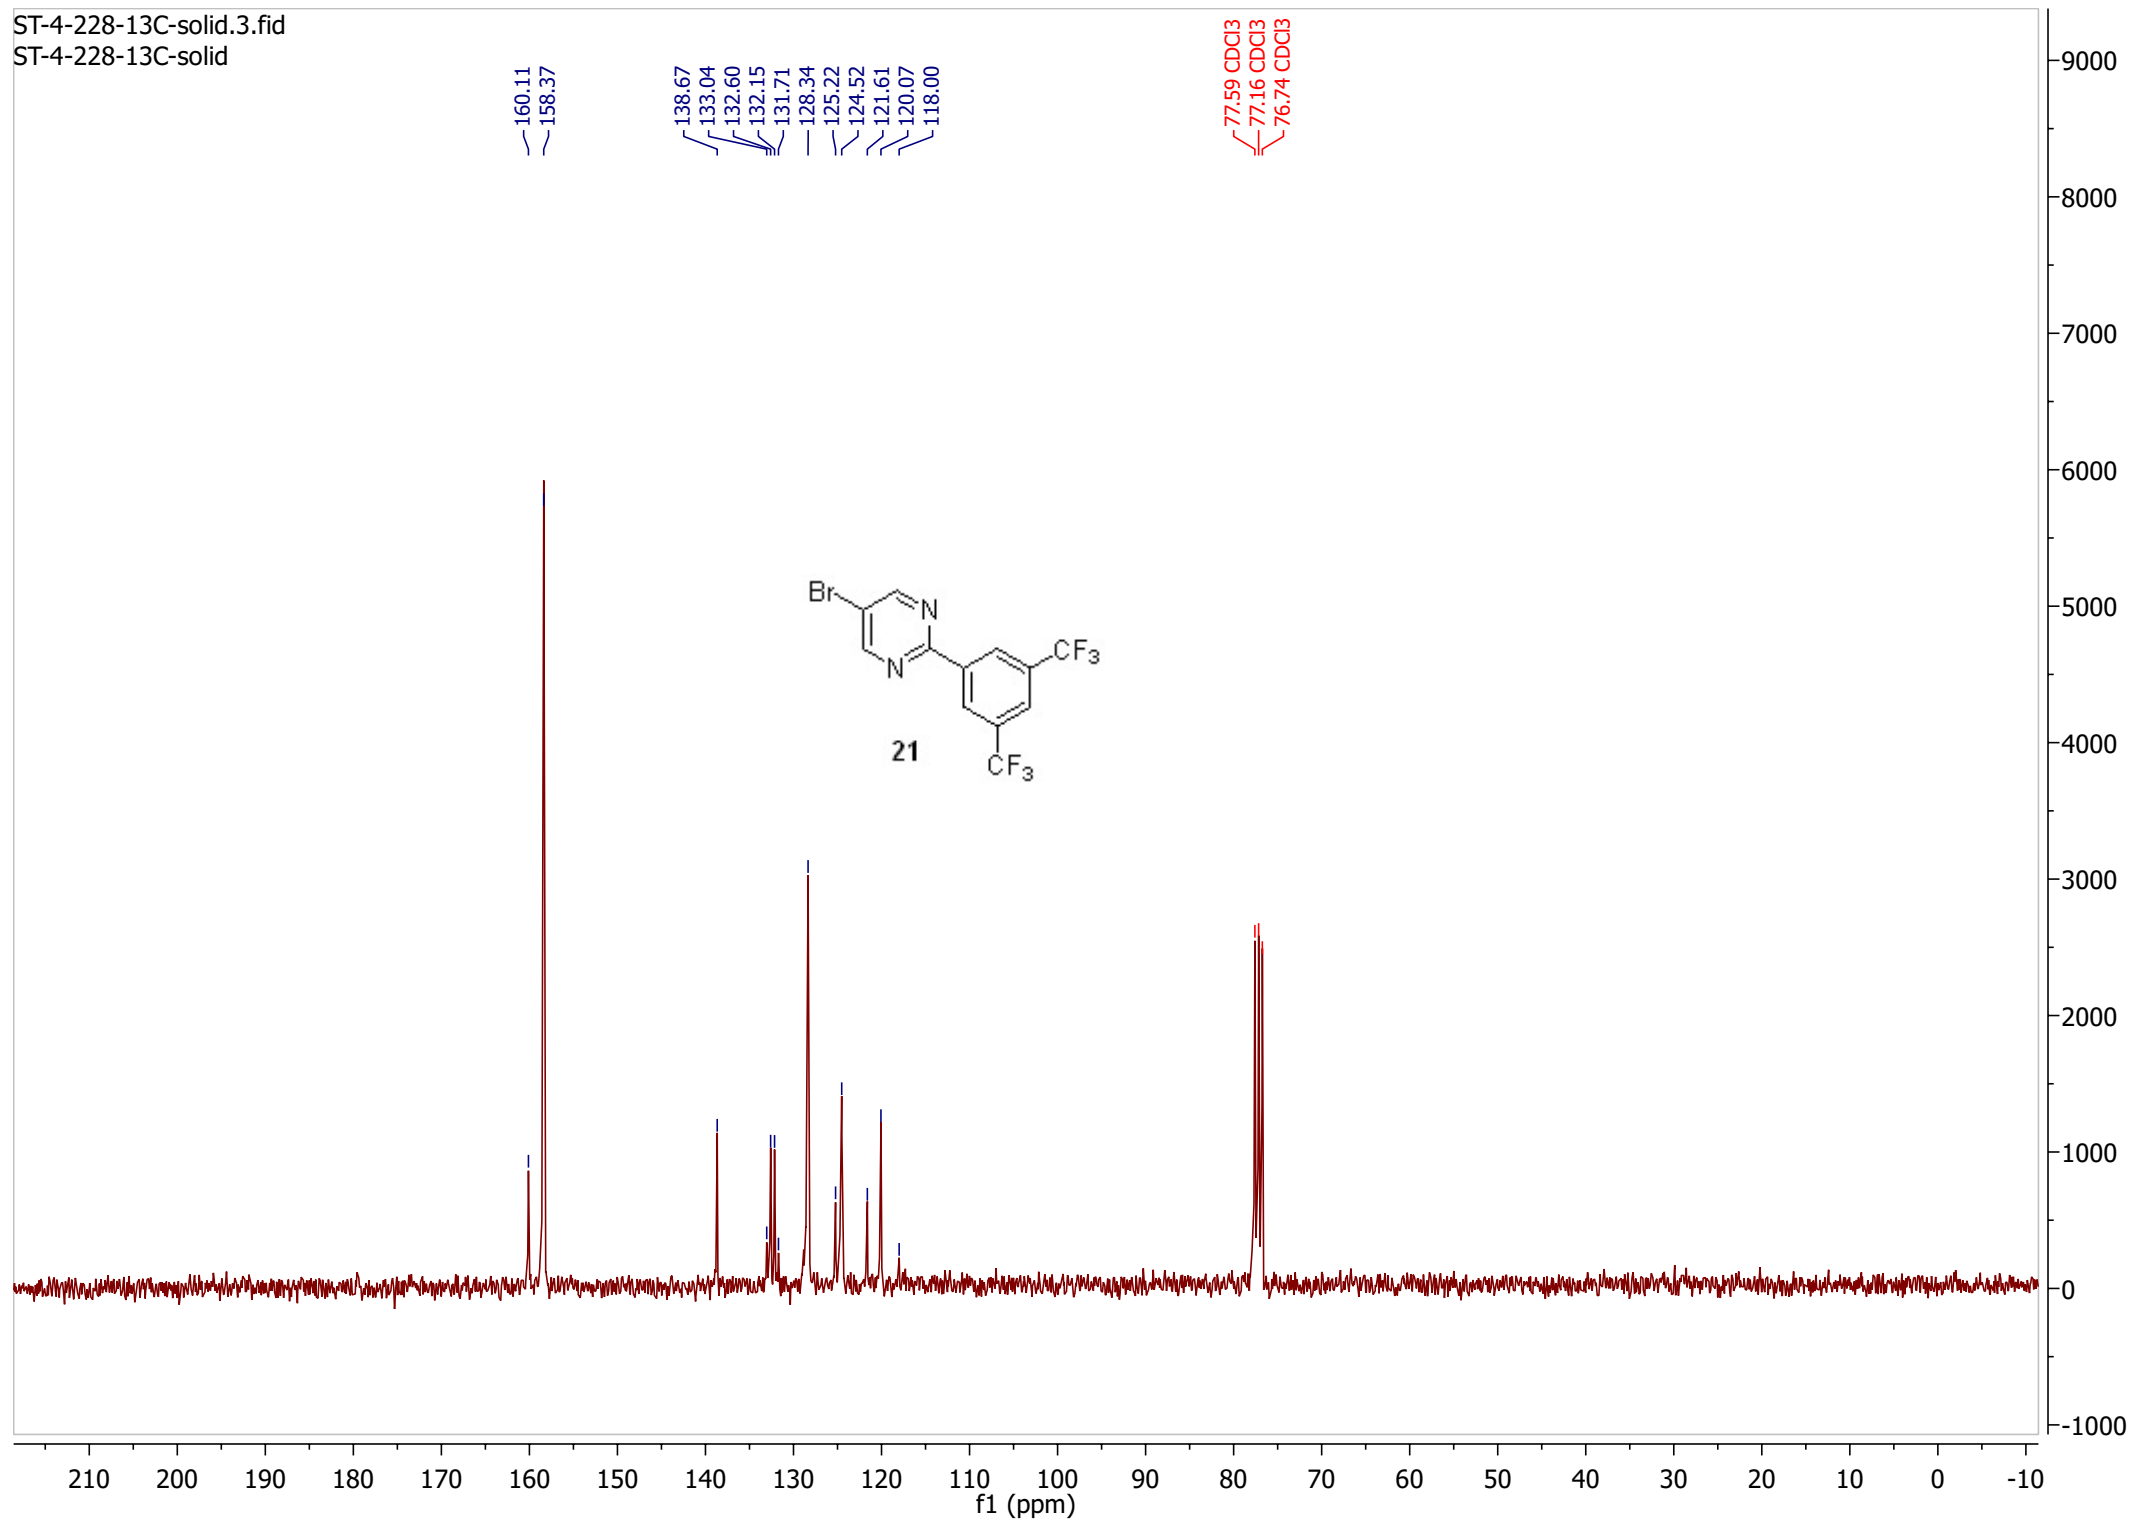

ST-4-228-19F1.fid  
ST-4-228-19F

—61.32

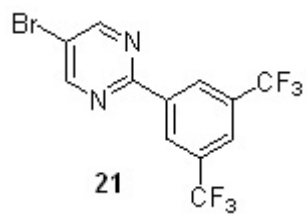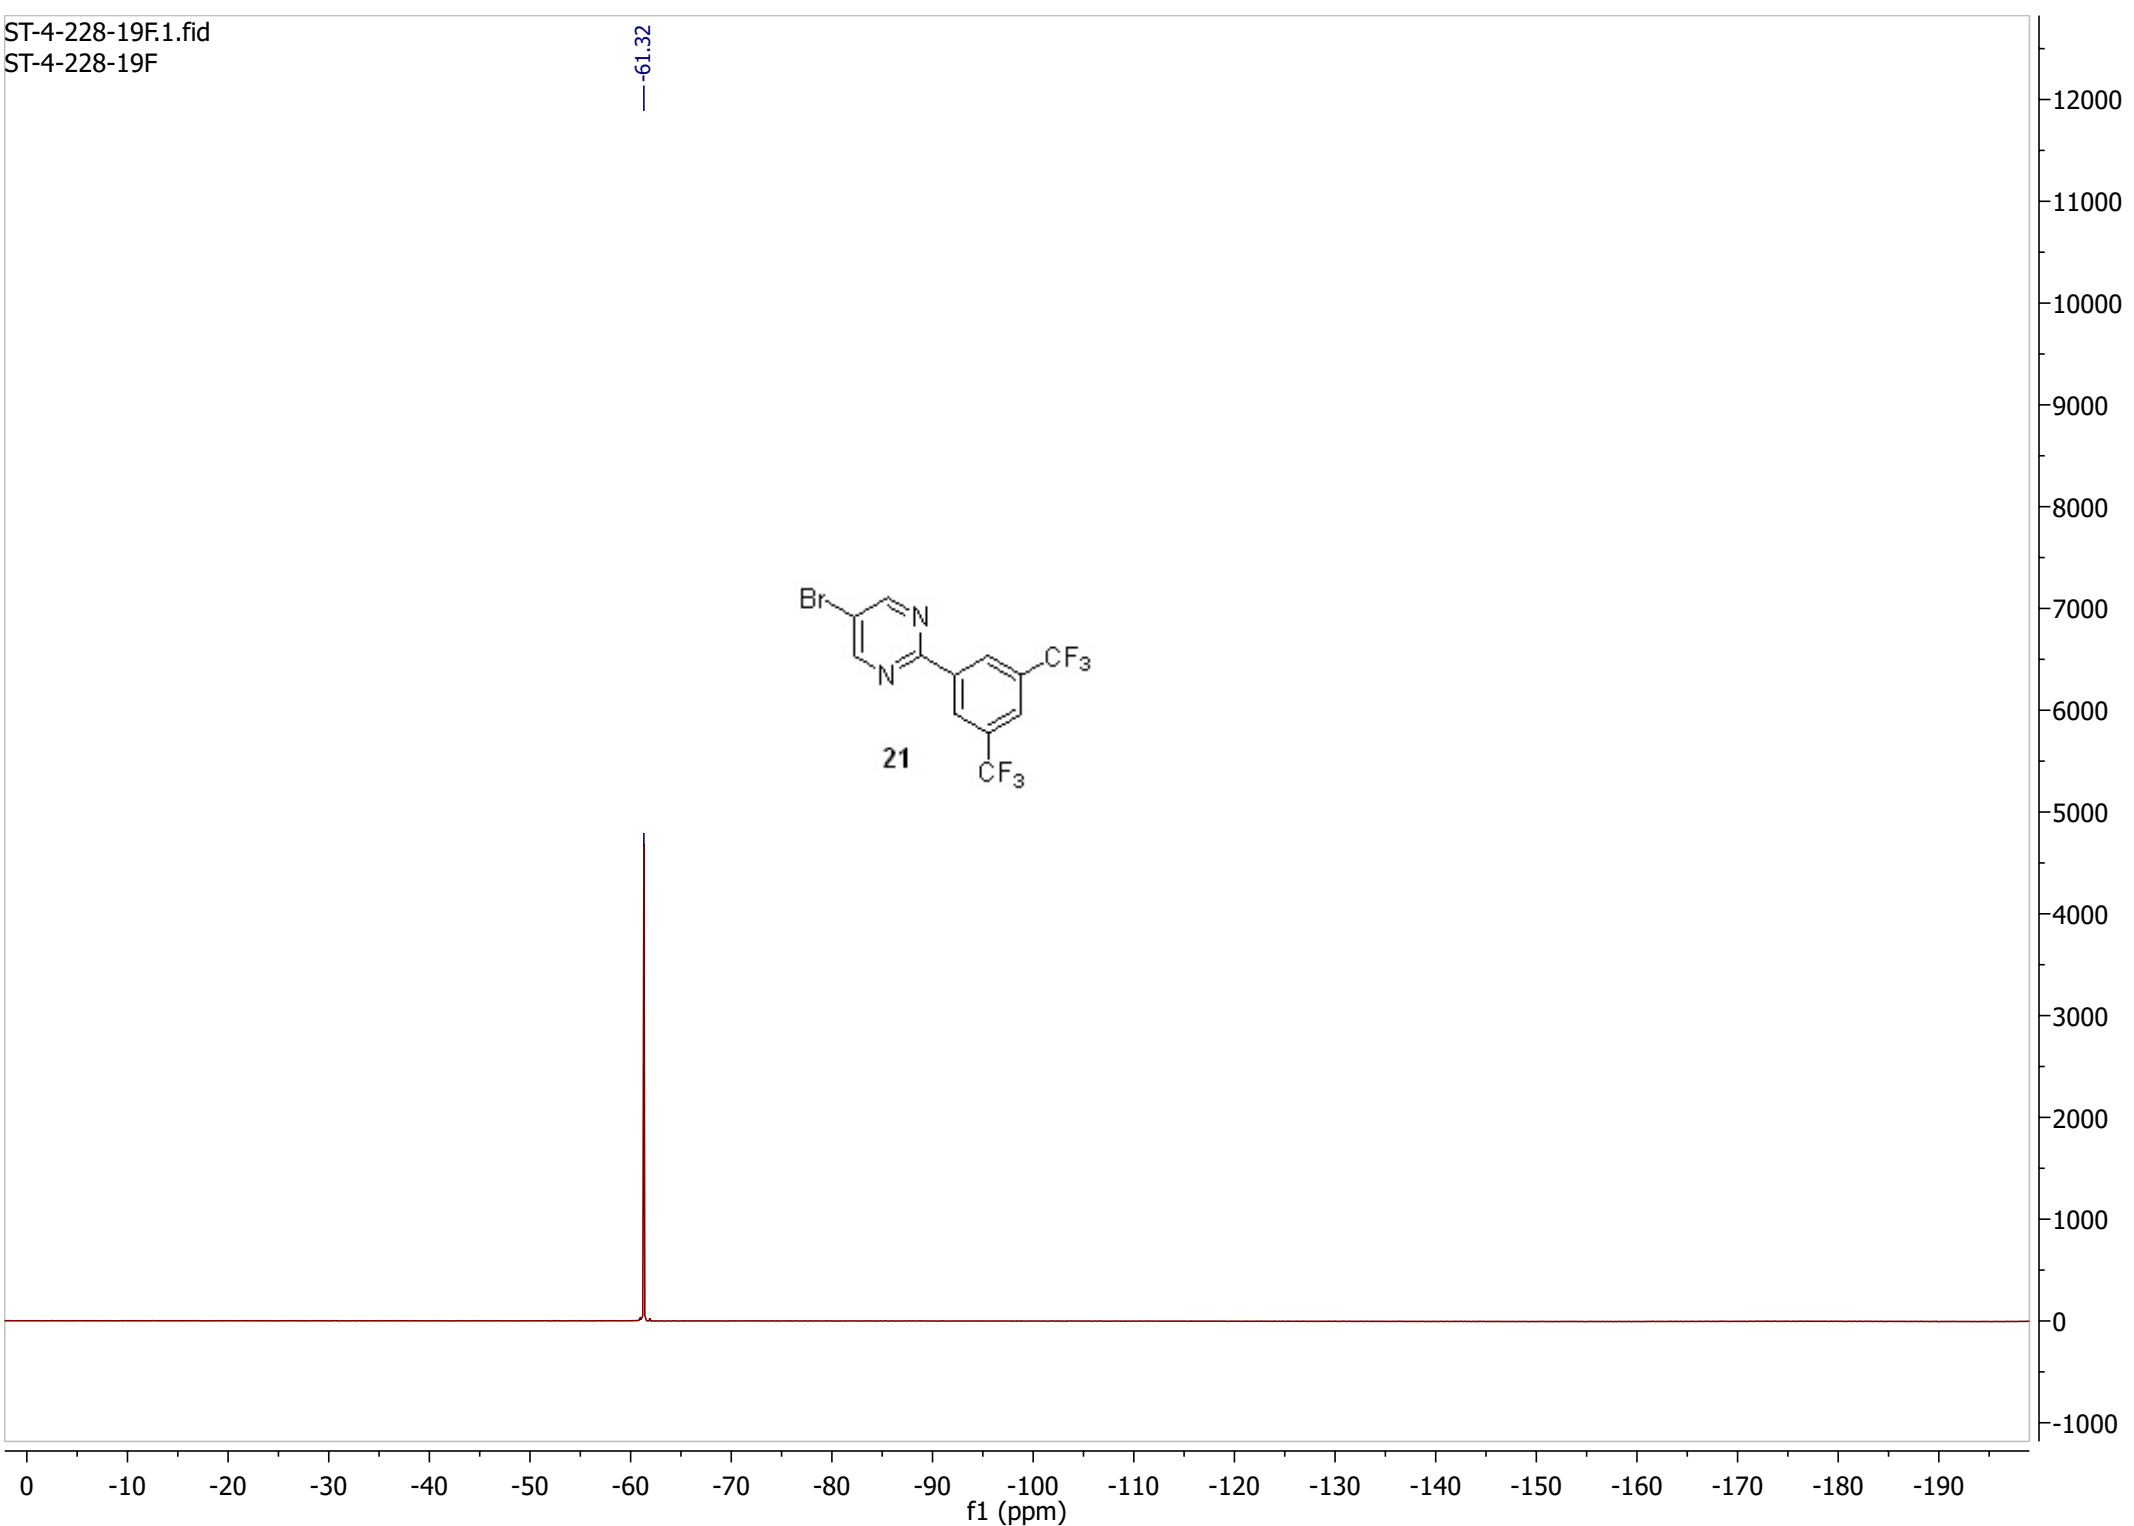

BJ-2-242-1H.1.fid  
BJ-2-242-1H

9.08  
9.01  
8.00  
7.67  
7.66  
7.65  
7.65  
7.64  
7.63  
7.59  
7.59  
7.58  
7.57  
7.57  
7.57  
7.56  
7.55  
7.54  
7.54  
7.53  
7.53  
7.52  
7.51  
7.50

28000  
26000  
24000  
22000  
20000  
18000  
16000  
14000  
12000  
10000  
8000  
6000  
4000  
2000  
0  
-2000

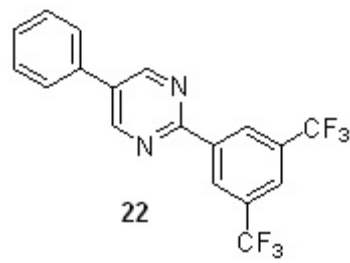

2.02  
2.03  
1.00  
1.96  
3.07  
f1 (ppm)

12.0 11.5 11.0 10.5 10.0 9.5 9.0 8.5 8.0 7.5 7.0 6.5 6.0 5.5 5.0 4.5 4.0 3.5 3.0 2.5 2.0 1.5 1.0 0.5 0.0 -0.5 -1.0

BJ-2-242-13C.1.fid  
BJ-2-242-13C

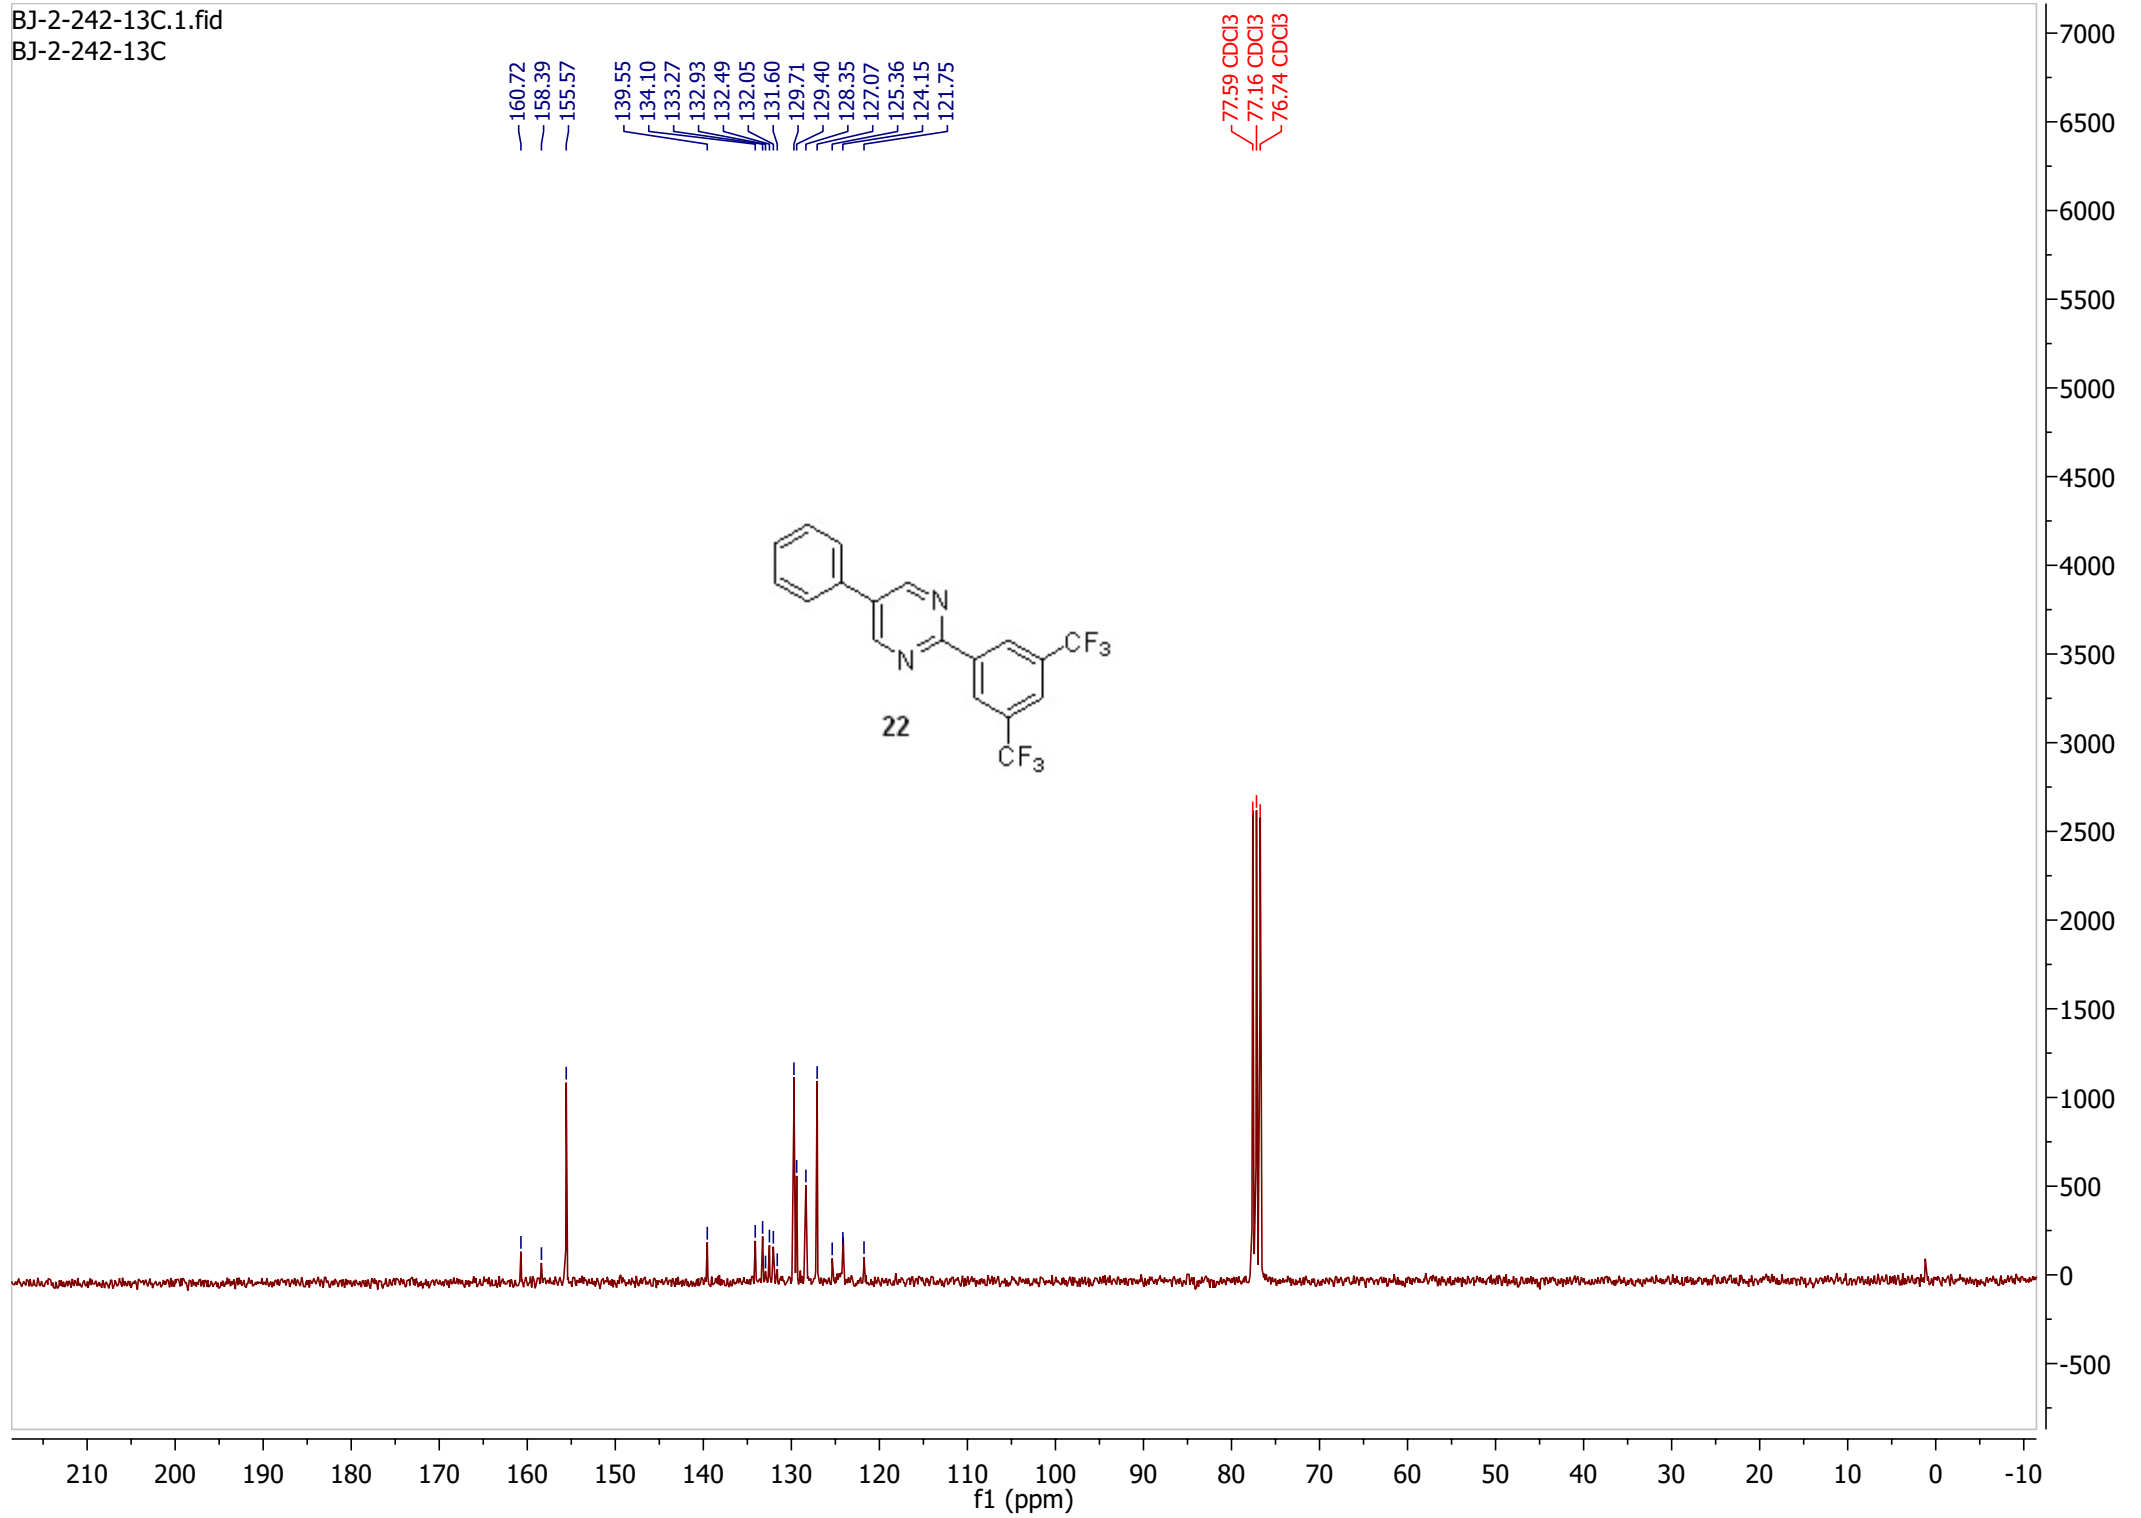



BJ-2-242-19F.1.fid  
BJ-2-242-19F

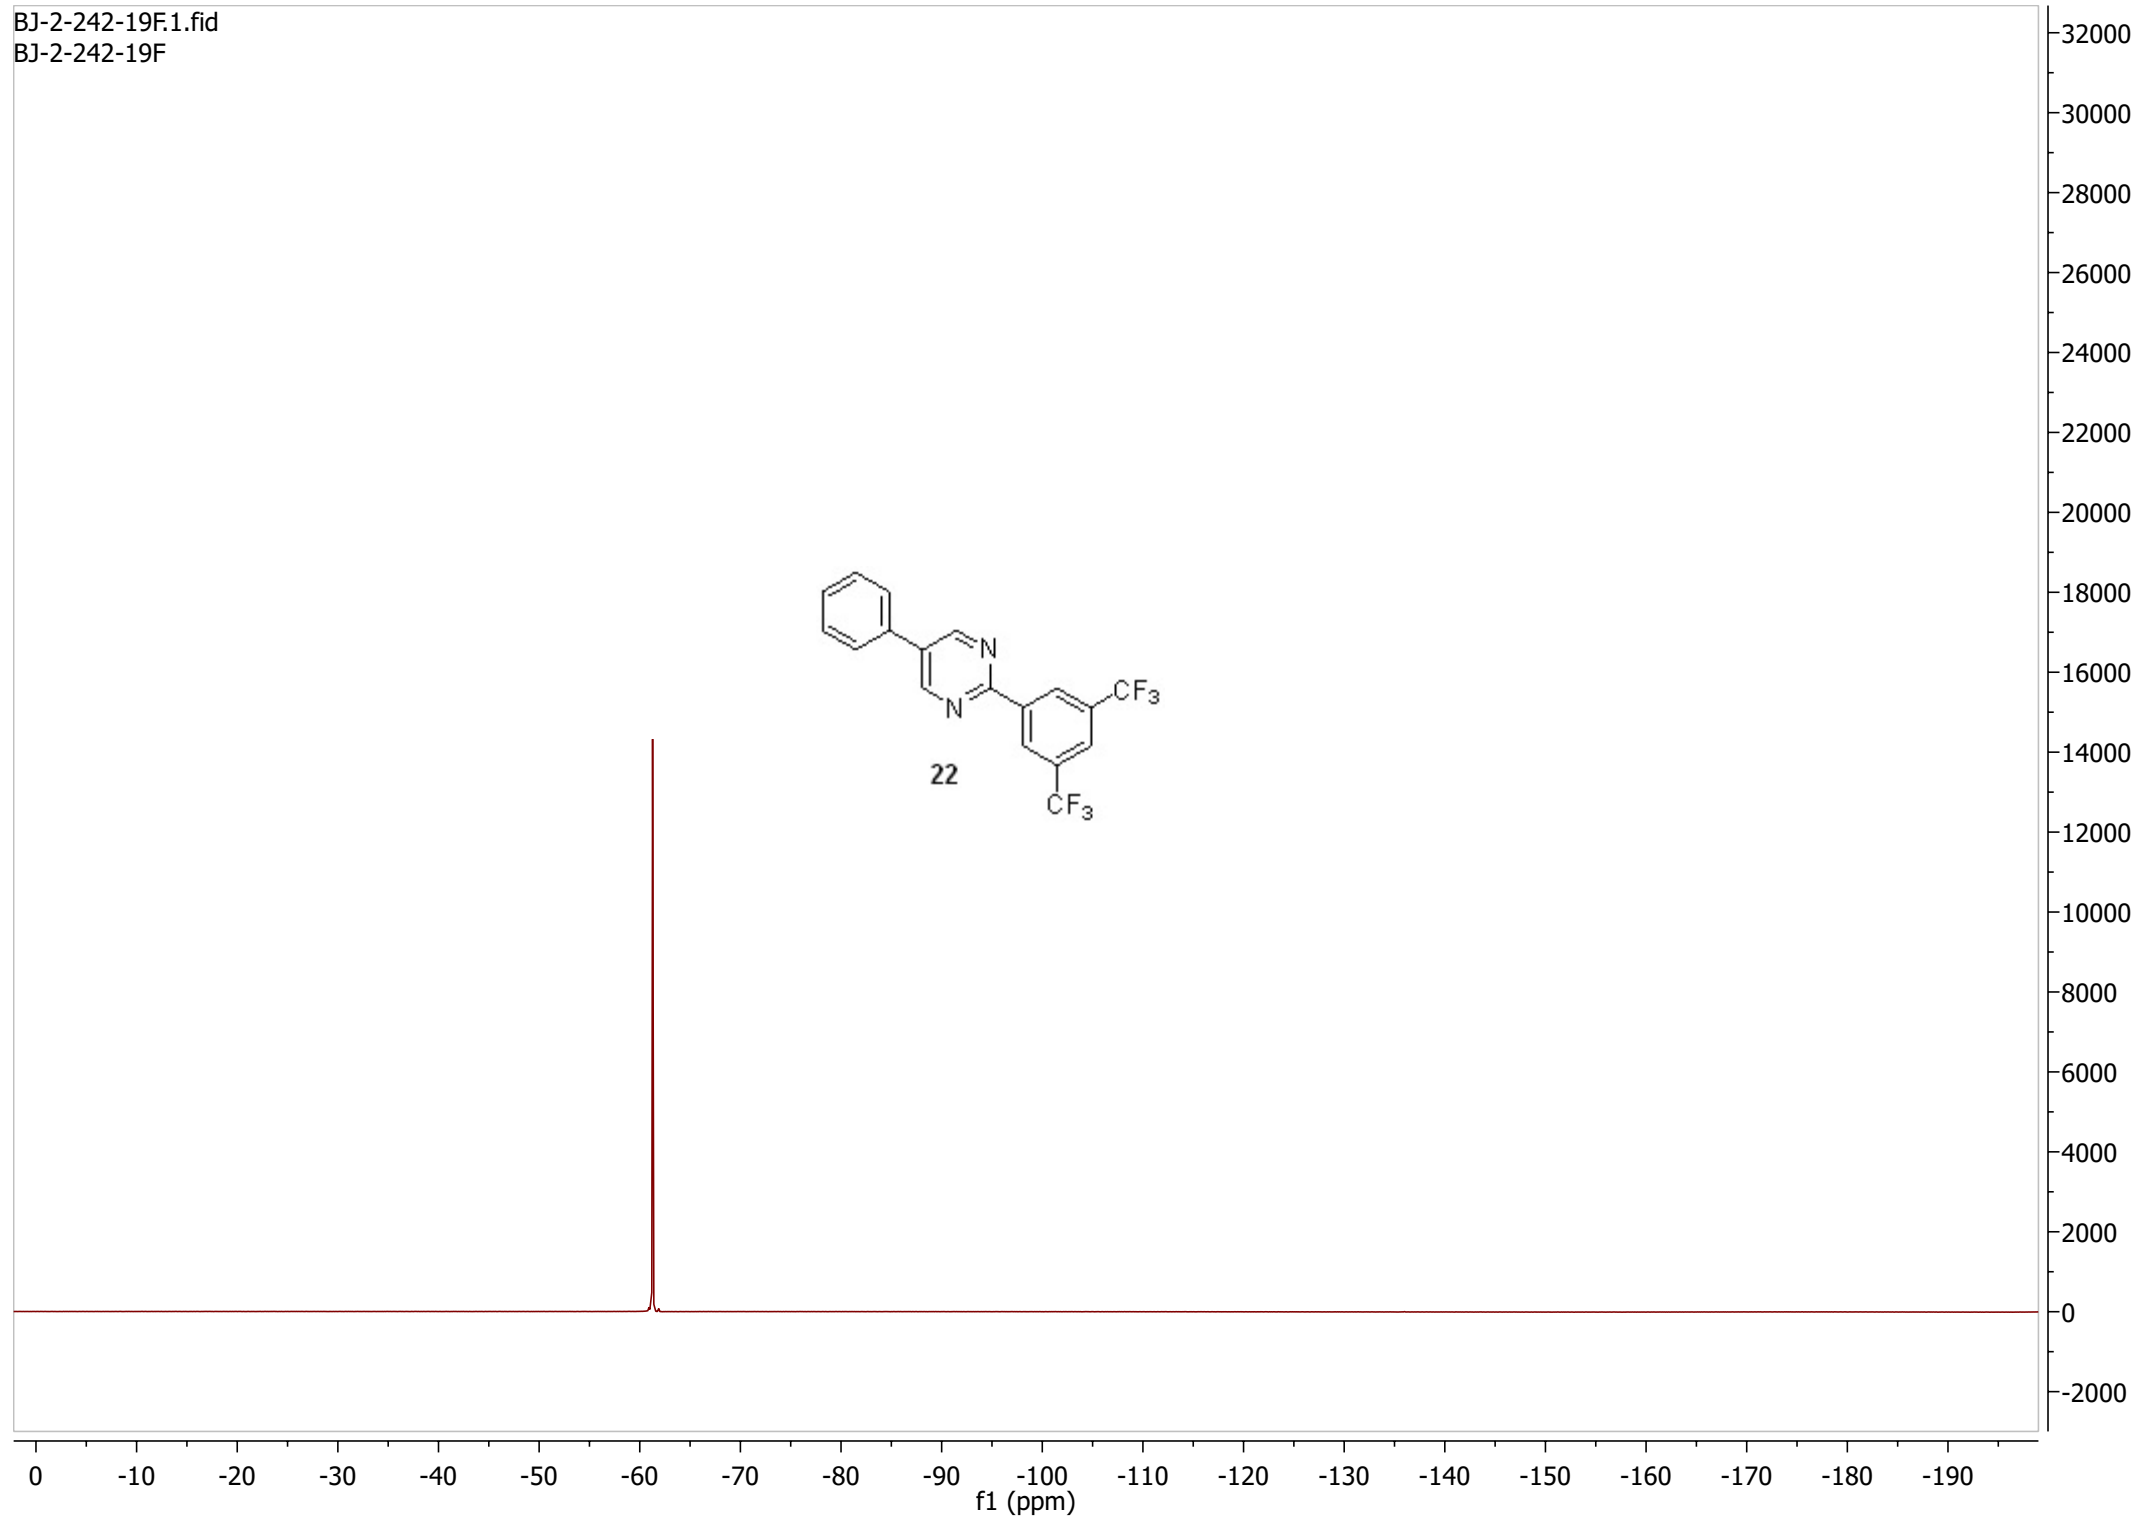

Supplement: c4qo00331d1.pdf [file c4qo00331d1.pdf]
